# Supplementary material for: p38 MAPK orchestrates cross-tissue potassium homeostasis for survival
Source: Research Square preprint supplement (doi:10.21203/rs.3.rs-7350614/v1), 2025-09-12
Supplement: Supplementary file 1 [file 3a32640e47d7104121545df8.xlsx]

## Sheet: Info
Sheet	Description	N	Differential expression	Related Figure	Notes
1	Genes downregulated by 100 mM NaCl	998	FC: 100 mM NaCl/NGM	Fig. 3a	padj < 0.05 cutoff
2	Genes upregulated by 100 mM NaCl	1241	FC: 100 mM NaCl/NGM	Fig. 3a	padj < 0.05 cutoff
3	Genes downregulated by 100 mM KCl	137	FC: 100 mM KCl/NGM	Fig. 3b	padj < 0.05 cutoff
4	Genes upregulated by 100 mM KCl	133	FC: 100 mM KCl/NGM	Fig. 3b	padj < 0.05 cutoff
5	Genes downregulated by 100 mM NaCl	1028	FC: 100 mM NaCl/100 mM KCl	Fig. 3c	padj < 0.05 cutoff
6	Genes upregulated by 100 mM NaCl	1340	FC: 100 mM NaCl/100 mM KCl	Fig. 3c	padj < 0.05 cutoff
7	Genes upregulated by PD	892		Fig. 3d	overlap between the 1241 genes and the 1340 genes
8	Genes downregulated by PD	636		Fig. 3d	overlap between the 998 genes and the 1028 genes
9	Genes upregulated by DM	2345	FC: DM(WT)/GM(WT)	Fig. 7d	padj < 0.05 cutoff
10	Genes upregulated by p38 in GM	1337	FC: GM(Mapk14)/GM(WT)	Fig. 7d	padj < 0.05 cutoff
11	Genes upregulated by p38 in DM	2157	FC: DM(Mapk14)/DM(WT)	Fig. 7d	padj < 0.05 cutoff
12	Genes upregulated by DM and p38	371		Fig. 7e	overlap between the 2345 genes, the 1337 gens and the 2157 genes
13	TFs in mouse	1473		Fig. 7f	https://tflink.net/
14	Atf2 targets in mouse	7511		Fig. 7f	https://tflink.net/
15	Atf7 targets in mouse	5641		Fig. 7f	https://tflink.net/

## Sheet: 1
gene	log2FoldChange	lfcSE	pvalue	padj
F33H12.7	-7.01246	1.2675	3.15686e-08	8.49142e-07
T26E4.4	-4.64686	1.49793	0.00192102	0.0160696
F45D11.1	-4.62551	1.21799	0.000146063	0.00182521
C10C5.5	-3.93197	0.298799	1.50623e-39	2.86846e-37
K09F6.5	-3.88272	1.3668	0.00450095	0.0325504
B0244.4	-3.47041	1.27892	0.0066566	0.044366
F54D8.10	-3.08609	0.333877	2.39291e-20	1.8277e-18
F57B1.1	-3.08189	1.02204	0.00256607	0.0205214
D1022.3	-3.0634	0.497898	7.61946e-10	2.56672e-08
C25F9.11	-3.03061	0.74373	4.60374e-05	0.000655586
Y48E1B.8	-3.01824	0.341955	1.08078e-18	7.4215e-17
T20D4.3	-2.93492	0.897033	0.00106864	0.0100351
cyp-29A3	-2.88279	0.604766	1.87179e-06	3.75489e-05
lon-1	-2.8388	0.175642	9.28244e-59	3.39951e-56
K12B6.11	-2.78907	0.623684	7.75204e-06	0.000135358
C10C5.3	-2.75447	0.111694	2.8133e-134	4.4647e-131
irg-1	-2.68576	0.531577	4.36204e-07	9.88937e-06
Y47D7A.6	-2.54639	0.309458	1.89477e-16	1.1922e-14
linc-5	-2.53674	0.59437	1.97283e-05	0.000309648
Y51B9A.6	-2.48548	0.683783	0.000278089	0.0031852
cyp-14A1	-2.44391	0.459072	1.01744e-07	2.58119e-06
drd-10	-2.43437	0.497923	1.01325e-06	2.12826e-05
ZK154.1	-2.43056	0.332456	2.65314e-13	1.2548e-11
T10B5.8	-2.41539	0.558008	1.50068e-05	0.000241376
Y71F9AM.9	-2.40638	0.444544	6.19273e-08	1.62295e-06
C18A11.4	-2.35691	0.806961	0.00349226	0.0262803
ugt-36	-2.3447	0.756337	0.00193479	0.0161511
ZK616.1	-2.33997	0.786679	0.00293472	0.0228056
twk-16	-2.33815	0.668978	0.000473864	0.00509654
F23D12.11	-2.31004	0.148217	9.11984e-55	3.02927e-52
gpx-4	-2.27056	0.730096	0.00187118	0.0157676
rpl-37	-2.25978	0.23388	4.36765e-22	3.69131e-20
F01G10.9	-2.21745	0.322051	5.76227e-12	2.38558e-10
B0205.13	-2.20877	0.289881	2.5449e-14	1.3266e-12
ncx-6	-2.18881	0.443248	7.88817e-07	1.70191e-05
Y82E9BL.18	-2.18708	0.693082	0.00160175	0.01407
T13F3.6	-2.12676	0.0910305	1.01333e-120	1.20612e-117
nhr-74	-2.11799	0.78673	0.00709944	0.0466288
Y94H6A.10	-2.1139	0.111908	1.39044e-79	8.27483e-77
Y47D7A.7	-2.07126	0.634788	0.00110272	0.0103077
F08G2.5	-2.05262	0.43535	2.41855e-06	4.71272e-05
R08E5.1	-2.05021	0.225138	8.511e-20	6.29128e-18
asp-17	-2.04856	0.388237	1.31629e-07	3.29256e-06
T05H4.4	-1.99789	0.572703	0.000485678	0.00519232
acdh-2	-1.99418	0.106813	8.72526e-78	4.98492e-75
his-24	-1.99037	0.233309	1.45034e-17	9.50241e-16
K10D3.6	-1.97544	0.216937	8.54518e-20	6.29128e-18
clec-245	-1.96942	0.637799	0.00201621	0.0166845
ZC250.4	-1.95402	0.220517	7.92336e-19	5.46712e-17
nkat-1	-1.94141	0.727416	0.0076096	0.0490727
chil-23	-1.93034	0.718385	0.00720852	0.0471425
T24D3.2	-1.92321	0.443158	1.42621e-05	0.000231155
Y52B11A.11	-1.91519	0.693783	0.00577121	0.0396872
gst-38	-1.90397	0.48119	7.59586e-05	0.00102641
pud-1.2	-1.89681	0.471121	5.66916e-05	0.000786906
nlp-26	-1.85786	0.622281	0.0028306	0.0221531
acsd-1	-1.82203	0.322297	1.57433e-08	4.47042e-07
chil-19	-1.82121	0.453703	5.96737e-05	0.000823497
VB0395L.1	-1.79947	0.354198	3.76641e-07	8.64882e-06
C17G10.7	-1.78512	0.544236	0.00103788	0.00979776
Y69A2AR.12	-1.78434	0.34903	3.18309e-07	7.38054e-06
C08F11.1	-1.7725	0.422063	2.67364e-05	0.000407118
T19D7.6	-1.75165	0.628292	0.00530408	0.0372093
ZK512.7	-1.74739	0.105496	1.27596e-61	5.207e-59
vglu-3	-1.72024	0.242943	1.43299e-12	6.31712e-11
DC2.5	-1.71106	0.257158	2.85769e-11	1.08554e-09
R07E5.4	-1.70233	0.256064	2.97e-11	1.12521e-09
F35F10.1	-1.67643	0.566339	0.00307523	0.0236912
C44C10.3	-1.67145	0.281156	2.76563e-09	8.6626e-08
T01G5.1	-1.67094	0.215302	8.43065e-15	4.54396e-13
M01G12.9	-1.6709	0.186768	3.67287e-19	2.58421e-17
F33E2.4	-1.66743	0.531499	0.00170551	0.0147012
hrg-6	-1.64728	0.546068	0.00255608	0.0204644
F22F7.8	-1.64117	0.213438	1.48043e-14	7.80256e-13
Y69A2AR.25	-1.62248	0.344589	2.49606e-06	4.84392e-05
C01H6.8	-1.61834	0.28922	2.19965e-08	6.07901e-07
arf-1.1	-1.60722	0.343576	2.89803e-06	5.53376e-05
sqrd-1	-1.60368	0.2013	1.63068e-15	9.46788e-14
T20D4.5	-1.60292	0.539594	0.0029721	0.0229835
arrd-20	-1.57668	0.585258	0.0070602	0.0464276
B0280.2	-1.56926	0.539069	0.00360217	0.0270148
C13F10.1	-1.5617	0.552329	0.00469165	0.0337246
clec-1	-1.55487	0.100214	2.72208e-54	8.27224e-52
cln-3.3	-1.55356	0.271123	1.0037e-08	2.92569e-07
fbxa-216	-1.54546	0.35228	1.14918e-05	0.000191084
col-101	-1.53848	0.117946	6.88383e-39	1.24458e-36
nhr-210	-1.51153	0.365177	3.48545e-05	0.000513224
clec-67	-1.49513	0.240133	4.77709e-10	1.64412e-08
clec-47	-1.49457	0.317092	2.43668e-06	4.74156e-05
his-38	-1.49229	0.297732	5.38124e-07	1.19534e-05
C34H4.1	-1.47854	0.237448	4.76119e-10	1.64261e-08
nduo-3	-1.47094	0.225478	6.86154e-11	2.51291e-09
ugt-32	-1.47094	0.536848	0.00614466	0.0417328
M153.2	-1.44882	0.305347	2.08689e-06	4.1284e-05
fipr-11	-1.44787	0.287692	4.83579e-07	1.08429e-05
C31H2.4	-1.44096	0.224624	1.40834e-10	5.04143e-09
Y41C4A.32	-1.43701	0.370137	0.000103444	0.00135301
spp-17	-1.43654	0.115182	1.06215e-35	1.68564e-33
Y50D4B.4	-1.41869	0.128996	3.9098e-28	4.85597e-26
afmd-1	-1.40594	0.30208	3.25245e-06	6.1448e-05
R193.2	-1.40462	0.151845	2.23785e-20	1.72774e-18
C18H7.11	-1.39731	0.391603	0.000359462	0.00400484
asm-3	-1.39029	0.226588	8.47528e-10	2.84597e-08
ugt-21	-1.36049	0.226525	1.90266e-09	6.06599e-08
cyp-33C8	-1.35403	0.19337	2.51889e-12	1.0804e-10
C42D4.2	-1.34666	0.159898	3.70182e-17	2.38167e-15
cyp-35C1	-1.34262	0.416619	0.0012701	0.0116139
his-40	-1.33562	0.379517	0.000432749	0.00470035
R05A10.3	-1.32785	0.442952	0.00272008	0.0214646
K01C8.1	-1.31697	0.0905027	5.69815e-48	1.47976e-45
cyp-36A1	-1.30516	0.242075	6.98477e-08	1.79754e-06
C49G7.12	-1.3015	0.43588	0.00282724	0.022139
F58B4.5	-1.29401	0.122627	4.95049e-26	5.35665e-24
C05D11.5	-1.29383	0.25869	5.68949e-07	1.25794e-05
ugt-16	-1.29093	0.342505	0.000163845	0.00200703
R04A9.6	-1.28583	0.378415	0.000678999	0.00686837
C26G2.2	-1.2788	0.181851	2.03427e-12	8.83147e-11
F45D3.3	-1.27484	0.133754	1.55448e-21	1.25438e-19
F55G11.2	-1.26566	0.213624	3.12909e-09	9.65289e-08
vit-3	-1.25933	0.0797407	3.48798e-56	1.18616e-53
Y51H4A.7	-1.2488	0.127893	1.60007e-22	1.41073e-20
kynu-1	-1.2278	0.0940061	5.51321e-39	1.02266e-36
ugt-62	-1.22661	0.0802826	1.06162e-52	2.97315e-50
F58G6.9	-1.21003	0.184652	5.6377e-11	2.09151e-09
col-110	-1.20186	0.362107	0.000903198	0.00876385
vit-4	-1.18718	0.0721636	8.21451e-61	3.25911e-58
C33A12.19	-1.18558	0.171721	5.05273e-12	2.12259e-10
dod-17	-1.18047	0.161973	3.14437e-13	1.47733e-11
fpn-1.2	-1.16236	0.347473	0.00082232	0.00810013
haao-1	-1.15648	0.123792	9.44325e-21	7.37038e-19
zipt-2.3	-1.15323	0.271446	2.15219e-05	0.000334128
elo-5	-1.15313	0.0823052	1.3462e-44	3.15209e-42
lgc-4	-1.15153	0.367012	0.00170355	0.0147009
W02B3.4	-1.15048	0.316445	0.000277295	0.00317866
C33G8.2	-1.14881	0.145301	2.64912e-15	1.50148e-13
nhr-115	-1.14569	0.357983	0.00137238	0.0123437
rhy-1	-1.14447	0.163935	2.92653e-12	1.24775e-10
fbxa-72	-1.14173	0.113885	1.1809e-23	1.1024e-21
nhr-43	-1.1389	0.243917	3.02365e-06	5.75824e-05
F19B2.5	-1.13878	0.141064	6.86976e-16	4.10547e-14
haly-1	-1.13793	0.0845157	2.5419e-41	5.26172e-39
R10E8.3	-1.13083	0.423105	0.00752428	0.0486915
D1081.6	-1.12634	0.354661	0.00149421	0.0132641
T13C2.3	-1.11865	0.333916	0.00080789	0.00799106
mltn-10	-1.11858	0.356242	0.00168976	0.0146335
K02E7.6	-1.11805	0.234386	1.84094e-06	3.70863e-05
cysl-2	-1.11501	0.10882	1.22875e-24	1.21877e-22
R08E5.3	-1.11356	0.106093	9.00602e-26	9.67165e-24
C50D2.6	-1.10719	0.346396	0.00139193	0.0124958
K02E11.6	-1.1054	0.404305	0.00625577	0.0422864
nmat-1	-1.10026	0.28974	0.000146227	0.00182566
R11D1.3	-1.09888	0.295843	0.000203678	0.00242025
gpdh-1	-1.09532	0.161878	1.32105e-11	5.25586e-10
acp-6	-1.09447	0.0768503	5.05259e-46	1.22316e-43
W10G11.3	-1.08328	0.168604	1.3186e-10	4.75595e-09
T07A9.15	-1.08145	0.284751	0.000145932	0.00182517
F42A8.1	-1.08087	0.101933	2.86396e-26	3.24651e-24
E01G6.3	-1.08052	0.315402	0.000612877	0.00626976
ugt-4	-1.07757	0.190134	1.44943e-08	4.12396e-07
D1054.8	-1.06843	0.13906	1.55152e-14	8.14718e-13
C09B8.4	-1.06472	0.173571	8.55829e-10	2.85603e-08
M04C9.1	-1.06283	0.362311	0.00335206	0.0254397
F36G9.3	-1.06085	0.253771	2.91088e-05	0.000440425
C34C12.7	-1.06078	0.159381	2.82139e-11	1.07748e-09
gst-4	-1.05285	0.146511	6.66362e-13	3.05053e-11
R13D7.2	-1.04925	0.237244	9.74832e-06	0.000167551
ZC449.7	-1.04452	0.348346	0.002713	0.0214326
T12B5.14	-1.03868	0.298793	0.000508478	0.00539568
K08B12.3	-1.03836	0.313681	0.000932161	0.00898991
kmo-1	-1.03807	0.197751	1.5259e-07	3.73833e-06
plep-1	-1.03748	0.24163	1.75751e-05	0.000279227
ugt-53	-1.03578	0.221851	3.02959e-06	5.76188e-05
Y37H2A.14	-1.0292	0.354767	0.0037189	0.0277519
calm-1	-1.02775	0.327912	0.00172302	0.0148163
cbl-1	-1.02706	0.135163	2.99182e-14	1.54268e-12
F41E6.15	-1.0269	0.209493	9.49408e-07	2.01193e-05
col-143	-1.01504	0.123897	2.5548e-16	1.58653e-14
F56A8.9	-1.01337	0.326674	0.00192165	0.0160696
lap-1	-1.01125	0.074203	2.72569e-42	5.72516e-40
C45E5.4	-1.00738	0.278085	0.000291716	0.00332794
rpl-29	-1.00207	0.245768	4.55633e-05	0.000650905
nhr-114	-1.00081	0.0776269	4.95628e-38	8.73958e-36
R06C1.4	-1.00066	0.0895037	5.10342e-29	6.63277e-27
folt-1	-0.998645	0.297713	0.000795389	0.00787833
smd-1	-0.998576	0.0859676	3.42854e-31	4.70864e-29
T16G12.8	-0.990365	0.328959	0.00260731	0.0207672
C12D5.9	-0.989777	0.303437	0.00110674	0.0103318
F29C6.1	-0.986672	0.137085	6.13163e-13	2.8251e-11
hpd-1	-0.98476	0.077683	7.966e-37	1.33857e-34
pgph-2	-0.984227	0.133489	1.66698e-13	7.96304e-12
nekl-2	-0.977752	0.217961	7.26029e-06	0.000127394
lact-1	-0.977544	0.220404	9.19677e-06	0.000159028
dhs-20	-0.977219	0.188146	2.05884e-07	4.92479e-06
gfrp-1	-0.968976	0.310725	0.0018181	0.0154914
gst-24	-0.968057	0.299235	0.00121596	0.0111794
ugt-39	-0.96571	0.261668	0.000223733	0.00263662
M02H5.8	-0.960187	0.317738	0.00251151	0.0201415
tag-96	-0.95758	0.252499	0.000149189	0.00185454
F55D12.2	-0.957465	0.140573	9.68169e-12	3.92851e-10
slc-17.5	-0.949738	0.219008	1.44737e-05	0.000233738
C16E9.1	-0.944288	0.142689	3.6459e-11	1.36678e-09
Y39B6A.27	-0.943363	0.210855	7.6769e-06	0.00013421
F46C5.10	-0.940156	0.167918	2.15712e-08	5.98255e-07
abhd-3.2	-0.94014	0.098206	1.03704e-21	8.56185e-20
oatr-1	-0.934557	0.0748786	9.48358e-36	1.52196e-33
F53F1.2	-0.932318	0.107693	4.8363e-18	3.22789e-16
C44C10.11	-0.932199	0.259435	0.000326658	0.00368535
anmt-1	-0.906526	0.298353	0.00237812	0.0192337
fard-1	-0.905027	0.0876474	5.38841e-25	5.49733e-23
F14H3.4	-0.901033	0.266361	0.000717643	0.00722067
F20D6.5	-0.897875	0.182971	9.23925e-07	1.96668e-05
col-8	-0.896528	0.189059	2.11562e-06	4.17368e-05
T05B11.1	-0.893458	0.203061	1.08275e-05	0.000182368
pgp-9	-0.891643	0.13206	1.4604e-11	5.77808e-10
F49E7.2	-0.890797	0.332378	0.00736067	0.04794
C15A11.7	-0.885614	0.134406	4.42464e-11	1.65437e-09
ncx-7	-0.885473	0.167436	1.23381e-07	3.10254e-06
pcbd-1	-0.884113	0.225663	8.9343e-05	0.00118816
T03F1.11	-0.874385	0.27482	0.00146433	0.0130705
F07A11.5	-0.871951	0.143212	1.13952e-09	3.74155e-08
poml-3	-0.871233	0.165794	1.48084e-07	3.63539e-06
F45D3.4	-0.866683	0.13656	2.20217e-10	7.76632e-09
dhhc-9	-0.865774	0.251724	0.000583065	0.00601989
F58G6.7	-0.865063	0.149925	7.92905e-09	2.33506e-07
srp-2	-0.861843	0.16066	8.12169e-08	2.07517e-06
scav-4	-0.860903	0.154667	2.60392e-08	7.09768e-07
ech-7	-0.860847	0.139836	7.4553e-10	2.51735e-08
ZK742.3	-0.860555	0.194717	9.89192e-06	0.000169611
F59B10.4	-0.859323	0.274954	0.00177603	0.0151898
rft-1	-0.857848	0.20914	4.09977e-05	0.000593282
C52G5.2	-0.854961	0.162241	1.36656e-07	3.40044e-06
mtp-18	-0.849692	0.228547	0.000200962	0.00239594
poml-2	-0.849043	0.22105	0.000122557	0.00155705
gst-39	-0.838437	0.233234	0.000324595	0.00366497
T02B11.4	-0.837765	0.254825	0.00101042	0.00957656
cdr-7	-0.832386	0.222948	0.000188804	0.00227185
tmem-135	-0.828449	0.220711	0.000174353	0.00212481
T24C12.3	-0.822916	0.136809	1.79807e-09	5.74537e-08
lgc-45	-0.822365	0.147947	2.72088e-08	7.34638e-07
hmit-1.2	-0.822053	0.177327	3.55557e-06	6.68213e-05
gei-13	-0.821343	0.304464	0.00698271	0.0460107
scav-5	-0.810226	0.20377	7.00334e-05	0.000954473
pah-1	-0.809993	0.0890349	9.24527e-20	6.7718e-18
H06H21.8	-0.809607	0.0983075	1.78871e-16	1.13045e-14
cuc-1	-0.808355	0.139023	6.08077e-09	1.81698e-07
gcsh-1	-0.807229	0.188805	1.90734e-05	0.000300689
acs-7	-0.803258	0.293493	0.00620223	0.0420239
B0410.3	-0.802512	0.137596	5.46449e-09	1.63626e-07
F43C9.1	-0.802487	0.240849	0.000862517	0.00842636
F10E9.11	-0.801657	0.185064	1.47914e-05	0.000238181
ugt-61	-0.800529	0.190769	2.71292e-05	0.000412658
sec-22	-0.799997	0.206855	0.00010999	0.00142171
cyp-34A8	-0.798748	0.147836	6.55635e-08	1.70263e-06
far-5	-0.798523	0.241391	0.000939614	0.00904346
ugt-60	-0.798445	0.179452	8.61265e-06	0.000149471
ZK742.4	-0.795719	0.206413	0.000115734	0.00148121
W09G12.9	-0.791017	0.229958	0.000582081	0.00601989
Y11D7A.3	-0.788231	0.112776	2.76163e-12	1.18097e-10
Y73B3A.18	-0.787346	0.190429	3.55603e-05	0.000522539
best-24	-0.787055	0.174286	6.30512e-06	0.00011257
cln-3.1	-0.785958	0.24962	0.00164044	0.0142955
Y106G6D.6	-0.785314	0.211228	0.000200924	0.00239594
F54E2.1	-0.785104	0.105376	9.29602e-14	4.57845e-12
math-22	-0.780248	0.270702	0.00394765	0.0292298
C35C5.10	-0.778661	0.131481	3.17571e-09	9.77558e-08
spds-1	-0.777026	0.168996	4.26772e-06	7.89584e-05
ucr-11	-0.776865	0.196917	7.97553e-05	0.00106962
jmjc-1	-0.775475	0.236691	0.0010517	0.00990859
T14G8.3	-0.772473	0.100146	1.2243e-14	6.50061e-13
upb-1	-0.77149	0.0723253	1.4532e-26	1.67388e-24
sqst-2	-0.770384	0.247837	0.00188082	0.0158155
F53H8.3	-0.763143	0.258261	0.00312735	0.0239706
Y22D7AL.11	-0.760457	0.269767	0.00481825	0.0344096
sur-5	-0.756952	0.0824962	4.49117e-20	3.37618e-18
glp-4	-0.753994	0.0697769	3.23168e-27	3.84651e-25
nspc-17	-0.753765	0.244216	0.00202553	0.0167423
C34C12.8	-0.751092	0.101643	1.4737e-13	7.08715e-12
vit-1	-0.744264	0.0684132	1.45233e-27	1.74316e-25
tatn-1	-0.743892	0.0869666	1.19136e-17	7.84157e-16
prmt-6	-0.739597	0.184999	6.39228e-05	0.000876209
sams-1	-0.738931	0.0757407	1.73779e-22	1.52275e-20
C29E4.13	-0.738276	0.164136	6.86088e-06	0.00012098
C08F11.12	-0.736937	0.242876	0.00241166	0.0194682
C52B11.5	-0.728882	0.150772	1.33587e-06	2.75797e-05
T04B2.3	-0.72779	0.232361	0.00173531	0.0148951
tomm-7	-0.727457	0.178244	4.47955e-05	0.000641739
ampd-1	-0.724258	0.0800643	1.48359e-19	1.06483e-17
nhr-14	-0.72199	0.178046	5.01195e-05	0.000705973
fitm-2	-0.720839	0.115748	4.73533e-10	1.63764e-08
R07E3.4	-0.71978	0.169642	2.20614e-05	0.000341761
W06A7.4	-0.71948	0.143782	5.61601e-07	1.24555e-05
cpin-1	-0.71942	0.187279	0.000122318	0.00155705
F07A11.4	-0.715675	0.115533	5.84481e-10	1.99716e-08
acox-1.2	-0.711124	0.195474	0.000274822	0.00315791
pho-13	-0.709938	0.140154	4.07547e-07	9.32852e-06
T28C12.2	-0.709281	0.256009	0.00559653	0.0388412
erv-46	-0.706369	0.158198	8.00377e-06	0.000139242
F42H10.2	-0.702486	0.234162	0.00269977	0.0213515
B0507.3	-0.70181	0.258111	0.00654745	0.0437755
D1086.8	-0.695513	0.226116	0.00209858	0.0172761
hprt-1	-0.694829	0.104293	2.69594e-11	1.03511e-09
mpc-2	-0.69479	0.111078	3.97625e-10	1.38182e-08
pdi-6	-0.689528	0.0935509	1.69842e-13	8.08617e-12
ztf-26	-0.689042	0.229356	0.00266242	0.0210939
elo-2	-0.687609	0.0743582	2.30345e-20	1.76883e-18
T11G6.3	-0.686638	0.167535	4.1587e-05	0.000599382
suox-1	-0.683966	0.168446	4.89789e-05	0.000691954
C11E4.7	-0.683464	0.184051	0.000204458	0.00242469
ugt-46	-0.680708	0.102792	3.53976e-11	1.33048e-09
F46C5.6	-0.677927	0.22186	0.00224575	0.0183056
C29G2.6	-0.675133	0.162549	3.27556e-05	0.000486329
F19H6.4	-0.674539	0.204278	0.000959787	0.00919426
ras-2	-0.673681	0.132064	3.37535e-07	7.77583e-06
elo-6	-0.66599	0.087314	2.39288e-14	1.25192e-12
mis-12	-0.6635	0.203454	0.00110951	0.0103509
C53H9.3	-0.663318	0.24877	0.00766711	0.0493227
T09B4.8	-0.661278	0.0982696	1.70575e-11	6.69318e-10
B0222.5	-0.656931	0.151357	1.42298e-05	0.00023096
tin-9.1	-0.656756	0.206915	0.00150336	0.0133286
ckc-1	-0.653827	0.136355	1.62654e-06	3.32793e-05
C06A6.4	-0.650264	0.0768501	2.64059e-17	1.71434e-15
K01A11.1	-0.649424	0.233776	0.00546978	0.038054
hmit-1.3	-0.64821	0.136423	2.01932e-06	4.00582e-05
dhp-1	-0.646683	0.147954	1.23771e-05	0.000203198
C32E8.9	-0.646024	0.17754	0.000273955	0.00315048
T04G9.4	-0.643284	0.179313	0.000333871	0.00374896
R08F11.1	-0.642683	0.194757	0.00096712	0.00924415
Y66D12A.9	-0.638852	0.10752	2.82123e-09	8.81741e-08
sec-3	-0.638675	0.182849	0.000477782	0.00512324
acly-1	-0.637052	0.106282	2.04762e-09	6.51361e-08
ZK822.4	-0.636805	0.119789	1.06033e-07	2.68048e-06
pmt-2	-0.636585	0.0615133	4.24041e-25	4.35725e-23
trpp-4	-0.635726	0.181508	0.000460973	0.00498794
col-141	-0.632694	0.232679	0.00654448	0.0437755
K11G12.6	-0.63114	0.162276	0.000100537	0.00131861
C03B1.13	-0.630578	0.210481	0.0027365	0.0215347
cth-2	-0.628995	0.083307	4.34163e-14	2.22263e-12
Y47G6A.19	-0.626705	0.0917384	8.40653e-12	3.42081e-10
F59E12.6	-0.625936	0.197785	0.00155227	0.0136859
fut-8	-0.625486	0.192908	0.00118523	0.0109288
vab-8	-0.623714	0.13258	2.54588e-06	4.91389e-05
coa-4	-0.620926	0.108721	1.12192e-08	3.25438e-07
mboa-7	-0.616919	0.184394	0.000820889	0.00809162
F52H2.6	-0.616061	0.13694	6.83465e-06	0.000120667
F32A5.8	-0.615077	0.147758	3.14471e-05	0.00046885
C35A11.4	-0.61257	0.151084	5.02451e-05	0.000707045
aqp-8	-0.60962	0.0855084	1.00839e-12	4.52921e-11
dhs-25	-0.607719	0.120688	4.76673e-07	1.07049e-05
sodh-1	-0.607583	0.0939327	9.91253e-11	3.62099e-09
tre-2	-0.604595	0.0888461	1.01066e-11	4.07776e-10
che-10	-0.604358	0.174734	0.000542734	0.00566147
ZK6.8	-0.603527	0.149569	5.45752e-05	0.000761229
tomm-70	-0.600533	0.0848998	1.51154e-12	6.6225e-11
tin-13	-0.599189	0.140972	2.13385e-05	0.000331641
ssp-19	-0.598966	0.213503	0.00502508	0.0356371
lam-3	-0.597028	0.189751	0.00165306	0.0143968
Y34B4A.7	-0.5954	0.17846	0.000848938	0.0083132
coq-8	-0.592915	0.0966365	8.4883e-10	2.84597e-08
F40A3.2	-0.592758	0.13319	8.56884e-06	0.000148891
fkb-5	-0.592119	0.209209	0.00465076	0.0334644
F10E9.4	-0.591891	0.109633	6.70754e-08	1.73244e-06
aass-1	-0.588323	0.0779291	4.37037e-14	2.22936e-12
F44B9.2	-0.588294	0.124098	2.13136e-06	4.19893e-05
dnpp-1	-0.588032	0.0744843	2.91003e-15	1.62996e-13
pcyt-1	-0.587841	0.109499	7.94013e-08	2.03607e-06
ldp-1	-0.586785	0.0623076	4.61764e-21	3.68457e-19
F27B3.7	-0.585573	0.190636	0.00212857	0.0174545
mct-3	-0.584441	0.0822567	1.20251e-12	5.33397e-11
aat-2	-0.58408	0.188899	0.00198792	0.0165259
acy-3	-0.582123	0.208387	0.00521451	0.0367979
F27D4.4	-0.582109	0.0843558	5.17697e-12	2.16841e-10
F02H6.2	-0.580908	0.210394	0.00576155	0.0396589
K09C4.10	-0.580467	0.215937	0.00718533	0.047038
R10E8.7	-0.580339	0.212164	0.00623173	0.0421838
mrpl-41	-0.57816	0.115041	5.0162e-07	1.12123e-05
tdo-2	-0.578153	0.095345	1.32945e-09	4.30579e-08
C46C2.2	-0.574372	0.103239	2.64368e-08	7.16503e-07
pept-1	-0.573684	0.0721957	1.92257e-15	1.10281e-13
C01B10.11	-0.573682	0.158478	0.000294654	0.00335075
ugt-41	-0.573559	0.14614	8.68333e-05	0.0011591
acl-1	-0.573095	0.124602	4.23735e-06	7.87024e-05
K02F3.9	-0.573089	0.137238	2.96854e-05	0.000447726
idh-1	-0.571525	0.0562552	3.00608e-24	2.92081e-22
dnj-7	-0.569024	0.112749	4.49184e-07	1.01514e-05
tbc-6	-0.568636	0.157454	0.000304498	0.00345259
T20G5.8	-0.568097	0.191647	0.00303377	0.0234223
C10G8.4	-0.567381	0.197493	0.00406701	0.0299583
tlp-1	-0.567191	0.210021	0.00692051	0.0456993
Y32F6A.4	-0.566678	0.128011	9.56397e-06	0.000164979
prpf-4	-0.566572	0.084951	2.5687e-11	9.88917e-10
F26H9.5	-0.565782	0.0867193	6.83233e-11	2.50864e-09
xdh-1	-0.565241	0.115713	1.0351e-06	2.16954e-05
T05G5.1	-0.564774	0.156616	0.000310837	0.00352077
coq-1	-0.561863	0.0994261	1.59461e-08	4.51902e-07
gut-2	-0.56079	0.14983	0.000181949	0.00220049
cnnm-2	-0.5605	0.168048	0.00085188	0.00833384
K07A1.10	-0.560394	0.107838	2.02944e-07	4.87167e-06
Y53C10A.6	-0.560326	0.148511	0.000161324	0.00197955
T20D3.14	-0.560196	0.181863	0.00206786	0.017033
cbs-1	-0.559696	0.138646	5.41707e-05	0.000756324
C15F1.1	-0.559648	0.132885	2.53665e-05	0.000387727
K10B2.4	-0.558783	0.1303	1.79939e-05	0.000284614
atad-3	-0.558677	0.0805152	3.95513e-12	1.67134e-10
F37A4.2	-0.558094	0.160666	0.000513464	0.00544455
mrps-15	-0.557177	0.114352	1.10223e-06	2.30164e-05
baz-2	-0.556962	0.190259	0.00341827	0.025846
set-27	-0.556675	0.165078	0.000745732	0.00745367
clec-51	-0.556617	0.154129	0.000304577	0.00345259
C34B2.10	-0.556369	0.107167	2.08499e-07	4.96333e-06
D2092.4	-0.553197	0.112472	8.71904e-07	1.86428e-05
C49F5.7	-0.551487	0.170559	0.00122322	0.0112211
Y71H2AM.11	-0.548552	0.0930817	3.78719e-09	1.1583e-07
sfxn-2	-0.54743	0.198707	0.00586987	0.0401914
F55F8.3	-0.545339	0.103242	1.27669e-07	3.19911e-06
F54D10.7	-0.545023	0.197516	0.00579108	0.0398046
dpyd-1	-0.543079	0.076045	9.22861e-13	4.17127e-11
C29F7.3	-0.542258	0.0922293	4.11607e-09	1.25085e-07
dhs-19	-0.540487	0.132424	4.4748e-05	0.000641703
T26A5.8	-0.539277	0.152373	0.000401357	0.00441111
lnp-1	-0.537911	0.188848	0.00439431	0.0320174
dmd-7	-0.537264	0.120222	7.86076e-06	0.000136921
pfd-3	-0.534728	0.107224	6.13217e-07	1.3454e-05
F25B4.4	-0.53168	0.184075	0.00387227	0.0287911
C39D10.8	-0.529165	0.123848	1.93114e-05	0.000303771
erfa-1	-0.524873	0.065295	9.09566e-16	5.41305e-14
clu-1	-0.524747	0.091884	1.1233e-08	3.25438e-07
nspc-15	-0.523266	0.138143	0.000151946	0.00188226
B0252.3	-0.52297	0.143149	0.000258853	0.00299854
pcp-4	-0.520535	0.165821	0.00169445	0.0146589
ifd-2	-0.519029	0.163694	0.00152055	0.0134505
F57B10.8	-0.518011	0.146375	0.000401747	0.00441111
pro-3	-0.516279	0.105357	9.56962e-07	2.02194e-05
vit-5	-0.515401	0.0788656	6.35316e-11	2.34476e-09
alh-12	-0.514735	0.101103	3.55825e-07	8.18398e-06
crt-1	-0.514539	0.0843543	1.06247e-09	3.50467e-08
ncx-1	-0.513752	0.0904872	1.36577e-08	3.91712e-07
T25B9.9	-0.513038	0.0744473	5.52903e-12	2.30237e-10
catp-5	-0.512808	0.156998	0.0010895	0.0102041
C04E12.4	-0.512629	0.189058	0.00669819	0.0445372
eif-2Bbeta	-0.512502	0.125765	4.60009e-05	0.000655586
C18B12.6	-0.511826	0.177716	0.00397648	0.0293671
F17A9.5	-0.511523	0.153661	0.000871874	0.00850613
T28D6.7	-0.510684	0.1649	0.00195531	0.0162843
F13H10.8	-0.508294	0.125658	5.23086e-05	0.000732474
ule-4	-0.505361	0.126006	6.05583e-05	0.000834093
cee-1	-0.504542	0.106068	1.96716e-06	3.91868e-05
H40L08.1	-0.503598	0.162946	0.00199766	0.0165791
C35D10.5	-0.503563	0.144542	0.000494258	0.00526621
C43E11.9	-0.503535	0.102219	8.39025e-07	1.79937e-05
fipr-2	-0.503098	0.11458	1.12929e-05	0.000188651
F14B8.4	-0.502661	0.18611	0.00691569	0.0456993
msrp-3	-0.501541	0.177494	0.00471795	0.0338286
F09B12.3	-0.501357	0.106517	2.51618e-06	4.86972e-05
ZK512.2	-0.500511	0.0894496	2.20041e-08	6.07901e-07
ccdc-55	-0.496866	0.127269	9.4593e-05	0.00124868
eif-3.J	-0.496764	0.102197	1.16891e-06	2.4373e-05
slc-17.4	-0.496735	0.128478	0.000110497	0.00142568
erd-2	-0.496015	0.119168	3.15036e-05	0.000469204
ZK686.2	-0.495563	0.104573	2.14847e-06	4.22098e-05
D1022.4	-0.495513	0.162195	0.00225024	0.0183207
txdc-12.2	-0.495058	0.150845	0.0010311	0.00975307
lron-3	-0.494981	0.120932	4.25737e-05	0.000612366
tin-44	-0.492874	0.0954197	2.4001e-07	5.66622e-06
dct-6	-0.490915	0.12195	5.68437e-05	0.000788251
C34E10.10	-0.490337	0.139804	0.000452655	0.00490537
avr-15	-0.488405	0.174805	0.00520591	0.0367553
C03H5.5	-0.488228	0.180001	0.00668063	0.0444639
ugt-48	-0.487897	0.15043	0.0011813	0.0109095
C06G3.5	-0.486359	0.0935026	1.97623e-07	4.76798e-06
C44B7.5	-0.483333	0.0863015	2.13706e-08	5.93844e-07
F14B8.6	-0.480933	0.177546	0.00675299	0.0447785
egal-1	-0.480896	0.147752	0.00113495	0.0105606
C52D10.3	-0.480638	0.171977	0.0051935	0.0367026
pcp-3	-0.480569	0.0853055	1.76581e-08	4.97457e-07
let-268	-0.480198	0.148068	0.00118238	0.0109095
rpoa-2	-0.478926	0.0856002	2.20723e-08	6.08608e-07
C18E9.2	-0.478645	0.10128	2.29058e-06	4.4817e-05
pam-1	-0.478531	0.0753589	2.15273e-10	7.61075e-09
gop-2	-0.477592	0.116442	4.10406e-05	0.000593302
rpn-12	-0.476739	0.0849915	2.03203e-08	5.69088e-07
B0035.15	-0.476594	0.143384	0.000887701	0.00864283
mfap-1	-0.476531	0.0895427	1.02726e-07	2.60148e-06
C29E4.12	-0.473694	0.16628	0.00438876	0.0319983
gspd-1	-0.473418	0.0913686	2.20214e-07	5.22479e-06
mrps-9	-0.47319	0.10818	1.21938e-05	0.00020065
Y23H5B.5	-0.471495	0.0907443	2.0377e-07	4.88329e-06
C45E5.1	-0.470863	0.147393	0.00140019	0.0125463
drd-1	-0.470141	0.155798	0.00254761	0.020408
mnat-1	-0.469758	0.112141	2.80176e-05	0.000424815
C26B2.7	-0.468455	0.156672	0.00278951	0.0219036
R12C12.7	-0.468155	0.129256	0.000292435	0.00333082
gtl-1	-0.467437	0.134749	0.000522508	0.00553186
dpy-11	-0.467074	0.0878832	1.06824e-07	2.69569e-06
dnj-10	-0.467026	0.0982111	1.98125e-06	3.94125e-05
C48B4.9	-0.467012	0.150122	0.00186528	0.0157676
hyl-1	-0.466184	0.132448	0.000431955	0.00469529
dis-3	-0.464283	0.0943462	8.60775e-07	1.84325e-05
mrpl-4	-0.463717	0.12704	0.000262079	0.00302609
nep-22	-0.463495	0.0987568	2.6884e-06	5.16107e-05
dnj-20	-0.463259	0.062657	1.42942e-13	6.89744e-12
D1054.3	-0.462708	0.122295	0.000154605	0.00190693
fubl-4	-0.462448	0.138342	0.000829395	0.00815296
nhr-68	-0.461873	0.113632	4.81036e-05	0.00068161
apa-2	-0.459221	0.125318	0.000247885	0.00287849
ZC21.3	-0.45886	0.118232	0.000104025	0.00135689
chp-1	-0.458204	0.101115	5.85678e-06	0.000105755
F11C1.5	-0.456638	0.0764596	2.33964e-09	7.40956e-08
elo-1	-0.456463	0.0809052	1.68143e-08	4.74622e-07
C44H4.4	-0.456429	0.159567	0.00423086	0.0309735
set-18	-0.456077	0.141831	0.00130161	0.0118489
cpd-1	-0.455925	0.143738	0.00151434	0.0134177
C03H12.1	-0.455904	0.156188	0.00351219	0.0264163
enpl-1	-0.455318	0.0678622	1.9537e-11	7.62423e-10
K07F5.14	-0.45418	0.104616	1.41566e-05	0.000230295
F18C12.3	-0.453431	0.107963	2.67089e-05	0.000407118
Y18D10A.23	-0.45188	0.143081	0.00158741	0.0139612
F32B6.3	-0.450379	0.160627	0.00504913	0.03579
prx-19	-0.45017	0.115598	9.84908e-05	0.00129415
R04D3.3	-0.449521	0.110151	4.48517e-05	0.000641901
F18E3.13	-0.448171	0.148935	0.00261955	0.0207951
B0464.6	-0.448079	0.0926997	1.34044e-06	2.7627e-05
H06I04.3	-0.447945	0.0780281	9.42205e-09	2.76335e-07
Y39E4B.5	-0.44713	0.11629	0.000120571	0.00153623
C49H3.3	-0.446948	0.134399	0.000882484	0.00860377
dbt-1	-0.446862	0.085002	1.46359e-07	3.60422e-06
K11D9.3	-0.446754	0.129572	0.000564896	0.00586793
hsp-3	-0.445598	0.0593407	5.95153e-14	2.98265e-12
C27D8.3	-0.44485	0.145735	0.00226972	0.0184405
cnnm-3	-0.443854	0.142384	0.00182508	0.0155164
F59A3.2	-0.44381	0.137667	0.0012651	0.0115756
sars-1	-0.44331	0.0732201	1.40874e-09	4.55226e-08
T26G10.1	-0.44328	0.0929097	1.83238e-06	3.69659e-05
acs-14	-0.441922	0.0923807	1.72092e-06	3.49566e-05
alh-9	-0.441065	0.0719023	8.55709e-10	2.85603e-08
VF13D12L.3	-0.440686	0.121715	0.000293861	0.00334439
C17G10.1	-0.440645	0.10317	1.9454e-05	0.000305679
Y62H9A.3	-0.438463	0.102517	1.89454e-05	0.000299333
wdr-12	-0.43734	0.0995289	1.11232e-05	0.00018647
gldc-1	-0.436743	0.0741793	3.91704e-09	1.1929e-07
T04F8.2	-0.43663	0.125889	0.000523622	0.00553186
F13H8.2	-0.436247	0.108203	5.53671e-05	0.000770769
vglu-2	-0.436012	0.120373	0.000292147	0.0033302
mppa-1	-0.435371	0.104189	2.93244e-05	0.000443217
imb-3	-0.435258	0.0838723	2.10821e-07	5.01025e-06
Y11D7A.10	-0.434499	0.142887	0.00235908	0.0190905
R11H6.5	-0.432823	0.124248	0.000494802	0.00526621
his-41	-0.431936	0.142549	0.00244479	0.0196837
let-391	-0.431856	0.153568	0.00492122	0.0350223
K07H8.10	-0.425544	0.0761326	2.27702e-08	6.25437e-07
F43G9.12	-0.425038	0.122609	0.000527071	0.00553541
F42A9.6	-0.424947	0.113244	0.000175093	0.00213202
mrpl-9	-0.423645	0.110702	0.000129774	0.00164177
col-20	-0.423527	0.104531	5.08505e-05	0.000714832
cri-3	-0.422846	0.0806846	1.59947e-07	3.90517e-06
far-8	-0.422713	0.0988409	1.89687e-05	0.000299371
F56H9.2	-0.42225	0.148268	0.00440106	0.0320389
Y43F8C.13	-0.422031	0.120801	0.000476532	0.00511368
F47B7.2	-0.421448	0.128741	0.00106179	0.00998392
aco-1	-0.420343	0.0711786	3.51662e-09	1.08017e-07
adsl-1	-0.419816	0.0970298	1.51384e-05	0.000242673
sqv-3	-0.419381	0.141823	0.00310579	0.0238495
K11H12.7	-0.417013	0.110502	0.000160787	0.00197465
inf-1	-0.416224	0.0756008	3.68007e-08	9.84315e-07
C18E9.4	-0.415848	0.123294	0.000744057	0.00744213
mrps-31	-0.414843	0.12634	0.0010251	0.00970283
rnh-2	-0.414685	0.132999	0.00182104	0.0155006
ZK686.3	-0.413293	0.0986519	2.79686e-05	0.000424522
Y44F5A.1	-0.413041	0.135303	0.00226789	0.0184362
mrpl-34	-0.412905	0.131554	0.00169719	0.014669
bre-1	-0.412537	0.12088	0.000643035	0.00654164
C08B11.8	-0.411981	0.140883	0.00345256	0.0260364
C01B10.8	-0.411917	0.0984471	2.86241e-05	0.00043355
F13G3.10	-0.411805	0.151326	0.00650222	0.0435402
mct-6	-0.411045	0.0680104	1.50485e-09	4.84416e-08
Y49E10.18	-0.410179	0.135423	0.00245467	0.0197521
C37H5.13	-0.409351	0.132122	0.00194642	0.0162198
ncbp-1	-0.409344	0.100857	4.93509e-05	0.000696521
C18E3.9	-0.408832	0.135015	0.00246132	0.0197834
uri-1	-0.408012	0.110704	0.00022814	0.00267312
C44C1.1	-0.407888	0.127134	0.00133503	0.0120866
C56A3.5	-0.407838	0.113283	0.000317999	0.00359334
Y95D11A.1	-0.407245	0.152797	0.00769289	0.0494111
sna-1	-0.406803	0.114566	0.000384022	0.00425193
B0336.13	-0.406734	0.152787	0.00776565	0.0496939
F17E9.4	-0.405825	0.105073	0.000112325	0.00144275
catp-6	-0.40579	0.0943931	1.71619e-05	0.000272965
pcp-2	-0.404767	0.10696	0.000154154	0.00190301
act-5	-0.404229	0.0600754	1.71193e-11	6.69904e-10
Y57A10A.29	-0.403918	0.1511	0.0075136	0.0486915
F44G4.1	-0.40343	0.0891935	6.09437e-06	0.000109217
txl-1	-0.403322	0.087215	3.75585e-06	7.03077e-05
dnj-18	-0.402862	0.149218	0.00693768	0.0457906
tsfm-1	-0.402474	0.103906	0.000107305	0.0013927
hut-1	-0.402152	0.105708	0.000142162	0.0017827
uggt-1	-0.400687	0.10237	9.07453e-05	0.00120569
nrfl-1	-0.400554	0.0918659	1.2994e-05	0.00021277
ttr-31	-0.40022	0.119747	0.000831101	0.00816411
F02E8.4	-0.400055	0.109995	0.000275809	0.0031667
T06E6.1	-0.39994	0.126114	0.00151786	0.0134405
nap-1	-0.399649	0.0597946	2.32987e-11	9.01831e-10
Y106G6H.1	-0.399295	0.140852	0.00458476	0.0330394
kars-1	-0.398986	0.0821111	1.17919e-06	2.45158e-05
cnnm-1	-0.397128	0.130907	0.0024161	0.0194843
C50E3.5	-0.396864	0.134207	0.00310538	0.0238495
Y57A10A.27	-0.396308	0.115978	0.000632937	0.0064527
nid-1	-0.395748	0.0936189	2.36588e-05	0.000363745
W06A7.2	-0.39561	0.132153	0.00275718	0.0216736
bcas-2	-0.39524	0.111319	0.000384458	0.00425346
cra-1	-0.395233	0.0893862	9.79569e-06	0.000168163
cmt-1	-0.394952	0.124942	0.00157184	0.0138499
ech-2	-0.392742	0.113552	0.000542819	0.00566147
D2030.3	-0.392628	0.122601	0.00136245	0.0122775
ugt-47	-0.392536	0.110969	0.000404166	0.00443372
DY3.8	-0.392074	0.138727	0.00470994	0.0337881
C29H12.2	-0.391511	0.0911988	1.76324e-05	0.000279827
ddx-52	-0.390925	0.125113	0.00178058	0.0152197
B0564.7	-0.390431	0.115008	0.000686785	0.00694221
clik-1	-0.390373	0.0645913	1.50585e-09	4.84416e-08
T23F2.5	-0.38999	0.118944	0.00104266	0.00982991
rpn-8	-0.389301	0.0835159	3.14073e-06	5.96529e-05
nrf-6	-0.388672	0.0922856	2.53544e-05	0.000387727
pign-1	-0.387737	0.136415	0.00447832	0.0324196
Y47G6A.22	-0.386928	0.105393	0.000241326	0.00281146
Y76B12C.3	-0.386808	0.130175	0.00296403	0.0229459
gcst-1	-0.386271	0.0805659	1.631e-06	3.32793e-05
tofu-5	-0.386188	0.109119	0.000401415	0.00441111
cept-1	-0.386178	0.0966144	6.4122e-05	0.000878096
rpc-1	-0.385998	0.0987513	9.27603e-05	0.00123017
ZK1236.5	-0.385265	0.132349	0.00360311	0.0270148
let-767	-0.385258	0.0692349	2.62907e-08	7.13899e-07
C04E6.11	-0.385	0.108189	0.000372846	0.00414102
mrps-27	-0.384794	0.0944685	4.63602e-05	0.000659525
drh-2	-0.382474	0.136944	0.00522338	0.0368361
rpn-7	-0.380469	0.0867603	1.15829e-05	0.000192147
B0041.8	-0.380145	0.13169	0.00389352	0.028934
tut-2	-0.379885	0.132285	0.00408255	0.0300252
eif-2beta	-0.379029	0.0760026	6.13082e-07	1.3454e-05
cyn-16	-0.378679	0.133979	0.00470745	0.0337872
C18A3.3	-0.378226	0.0791745	1.77818e-06	3.59742e-05
T27E9.2	-0.378096	0.135696	0.00533058	0.0372853
C26F1.3	-0.377613	0.130887	0.00391372	0.0290546
B0361.6	-0.377014	0.119518	0.00160801	0.0140757
sams-3	-0.376713	0.0948495	7.13645e-05	0.000971687
rbm-34	-0.376453	0.0974176	0.000111399	0.00143602
ent-1	-0.375909	0.0924701	4.79925e-05	0.000680712
C48B4.11	-0.373153	0.125034	0.00284129	0.0222003
Y54E10A.6	-0.373068	0.136792	0.00638621	0.0428638
C35A5.3	-0.372628	0.114484	0.00113452	0.0105606
nhr-31	-0.372254	0.106597	0.000479149	0.00513019
col-140	-0.372	0.111071	0.000810418	0.00800526
cisd-3.1	-0.371752	0.127225	0.00347783	0.0261855
tag-335	-0.37163	0.106174	0.000464905	0.00502207
syx-5	-0.370493	0.109336	0.000702595	0.00708197
B0218.7	-0.369517	0.117312	0.00163349	0.0142523
paxt-1	-0.368288	0.122343	0.00261004	0.0207684
T19A6.1	-0.367905	0.123129	0.00280849	0.0220163
skih-2	-0.367783	0.128033	0.00407161	0.0299767
mans-2	-0.366705	0.0924533	7.29736e-05	0.000991705
F41E6.12	-0.365985	0.131045	0.00522509	0.0368361
W04A4.5	-0.365913	0.105018	0.000493462	0.00526372
hpo-29	-0.365754	0.099001	0.000220367	0.0026034
D1086.11	-0.365108	0.0857926	2.08385e-05	0.000325641
sbds-1	-0.36502	0.103876	0.000441442	0.00479112
chd-1	-0.364246	0.113683	0.00135514	0.0122271
pges-2	-0.363576	0.0901741	5.53199e-05	0.000770769
tin-9.2	-0.363479	0.111999	0.00117298	0.0108633
folt-2	-0.362621	0.0649267	2.33578e-08	6.40344e-07
C16C10.8	-0.361081	0.129639	0.00534828	0.0373908
C06H5.6	-0.360859	0.104524	0.000555589	0.00577967
R02F2.7	-0.3606	0.121376	0.00296887	0.022971
ska-3	-0.360227	0.116747	0.00203193	0.0167855
tald-1	-0.360187	0.0724271	6.58914e-07	1.43903e-05
dohh-1	-0.358258	0.11263	0.00146854	0.0130767
ilcr-2	-0.358153	0.116692	0.00214627	0.0175574
ctc-3	-0.356977	0.084765	2.53816e-05	0.000387727
gly-6	-0.356432	0.105647	0.000741387	0.00742583
Y41C4A.9	-0.356299	0.12942	0.00590453	0.0403321
F32A5.3	-0.35629	0.0861333	3.52644e-05	0.000518724
cct-3	-0.355984	0.0796168	7.77762e-06	0.000135638
scpl-4	-0.355175	0.10289	0.000556464	0.00578456
Y53C12B.1	-0.354373	0.107316	0.000959479	0.00919426
C46G7.2	-0.353482	0.0893634	7.63572e-05	0.00103082
F58B3.4	-0.353469	0.0998249	0.000398774	0.00439482
C35A5.8	-0.353141	0.0932056	0.000151351	0.00187652
swt-3	-0.35247	0.112485	0.00172739	0.0148449
tpp-2	-0.352308	0.0848688	3.30733e-05	0.000490536
ngp-1	-0.352206	0.0752488	2.86099e-06	5.47769e-05
rpb-5	-0.351818	0.0985195	0.000355549	0.00396742
mrps-35	-0.350908	0.0913615	0.000122598	0.00155705
T23D8.3	-0.350407	0.0839311	2.98077e-05	0.000449096
unc-97	-0.350312	0.0991234	0.000409165	0.00447824
qdpr-1	-0.349803	0.10089	0.000525996	0.00553186
rpn-3	-0.349652	0.0910366	0.000122641	0.00155705
K08E4.6	-0.349542	0.116163	0.00262056	0.0207951
ZC116.1	-0.349459	0.128124	0.00638148	0.0428522
eif-3.C	-0.34907	0.071226	9.5412e-07	2.01892e-05
ahcy-1	-0.348835	0.0524212	2.8433e-11	1.08296e-09
dnj-9	-0.348281	0.109555	0.00147762	0.0131494
asp-14	-0.347606	0.0841517	3.61655e-05	0.000529254
cct-4	-0.347605	0.0807018	1.65275e-05	0.000263565
T24B1.1	-0.34753	0.117351	0.00306198	0.0236146
Y54H5A.1	-0.34681	0.0884773	8.86385e-05	0.00118099
yars-1	-0.346755	0.0773164	7.29557e-06	0.000127856
T28C6.7	-0.346744	0.094684	0.00025014	0.00290231
ltah-1.2	-0.34636	0.0854024	5.00013e-05	0.000705003
F35A5.1	-0.345728	0.103392	0.000826242	0.00812756
tba-4	-0.345624	0.0936115	0.0002224	0.00262523
atgp-2	-0.345527	0.107317	0.00128329	0.0117194
F26B1.8	-0.344999	0.0883992	9.51108e-05	0.00125204
fars-3	-0.344809	0.089514	0.000117151	0.001498
ddx-17	-0.34469	0.0655397	1.44643e-07	3.57428e-06
dnj-11	-0.344559	0.0726916	2.13711e-06	4.20446e-05
timm-17B.1	-0.344242	0.109741	0.00170765	0.0147107
inx-8	-0.343559	0.101289	0.000694142	0.00701162
stl-1	-0.343364	0.112298	0.00223113	0.0182099
pro-2	-0.343195	0.0880843	9.77085e-05	0.00128506
pabp-2	-0.342801	0.0995175	0.000571849	0.00592722
tag-123	-0.342054	0.102888	0.000885665	0.00862889
nas-37	-0.341832	0.125075	0.00627565	0.0423606
ribo-1	-0.341509	0.0899863	0.000147568	0.00183599
ooc-5	-0.341085	0.11048	0.00201986	0.016705
pho-1	-0.340704	0.0869618	8.93377e-05	0.00118816
gars-1	-0.338167	0.0788429	1.79375e-05	0.000284036
mog-5	-0.337836	0.0893079	0.000155055	0.00191083
mrpl-47	-0.337279	0.104867	0.0012988	0.0118383
R08D7.4	-0.336127	0.122674	0.00614392	0.0417328
C39E9.11	-0.335961	0.11711	0.00412063	0.0302286
aagr-2	-0.335577	0.0766015	1.18238e-05	0.000195463
puf-12	-0.334944	0.0721436	3.43825e-06	6.4787e-05
C05C10.3	-0.334914	0.07283	4.25396e-06	7.89083e-05
dys-1	-0.334477	0.11332	0.00316121	0.0241937
cpsf-4	-0.334472	0.122546	0.00634572	0.0426835
daf-31	-0.334432	0.109388	0.0022334	0.0182179
emb-5	-0.334409	0.0772647	1.50406e-05	0.000241648
teg-4	-0.334221	0.0895322	0.000189237	0.00227515
cif-1	-0.332655	0.08421	7.80534e-05	0.00104778
rrp-1	-0.332506	0.106708	0.00183301	0.0155653
eif-3.L	-0.331955	0.0839303	7.64918e-05	0.00103124
rbpl-1	-0.331892	0.108699	0.00226328	0.0184091
H35B03.2	-0.331855	0.124206	0.00754452	0.0487614
rnf-121	-0.331283	0.122668	0.00692065	0.0456993
unc-112	-0.331182	0.105559	0.00170445	0.0147009
rars-1	-0.330881	0.0822935	5.80158e-05	0.000802169
pbs-7	-0.330376	0.0820443	5.65427e-05	0.000786368
aqp-7	-0.33016	0.0654593	4.56513e-07	1.03008e-05
gkow-1	-0.32987	0.104625	0.00161677	0.0141324
ZK546.14	-0.32913	0.0814543	5.32989e-05	0.00074561
del-6	-0.328948	0.0801548	4.06233e-05	0.000589657
ccdc-47	-0.328709	0.0718527	4.76769e-06	8.76408e-05
pmp-5	-0.328048	0.0810188	5.14291e-05	0.000721574
abcf-3	-0.327975	0.0815255	5.74686e-05	0.000795678
C14B1.9	-0.327119	0.105169	0.0018682	0.0157676
T20D3.5	-0.326751	0.114162	0.00420745	0.0308338
grd-3	-0.326078	0.100819	0.00121941	0.0111934
T14G10.5	-0.325958	0.101415	0.0013085	0.0119041
thoc-7	-0.325174	0.110591	0.00327879	0.0249765
ctc-1	-0.325108	0.0860003	0.000156627	0.00192854
iars-2	-0.324402	0.10339	0.00170308	0.0147009
F15B9.10	-0.323692	0.117126	0.00571638	0.039367
pyk-1	-0.3233	0.0628537	2.69378e-07	6.32818e-06
pas-2	-0.321628	0.0770707	3.00416e-05	0.000452144
crn-3	-0.321532	0.107594	0.00280451	0.0219979
hsp-1	-0.321257	0.0609112	1.33348e-07	3.32393e-06
mrps-14	-0.321134	0.1166	0.0058843	0.0402342
F55F8.2	-0.320924	0.103492	0.00192894	0.0161167
T15B7.1	-0.320919	0.0893809	0.000330096	0.00371826
F13B9.1	-0.320359	0.102865	0.00184347	0.0156263
pas-4	-0.320252	0.0752687	2.09247e-05	0.000326274
let-630	-0.319795	0.0946223	0.000725656	0.00728871
F21C10.7	-0.319773	0.118804	0.00711119	0.0466555
otub-3	-0.319557	0.0904183	0.000409004	0.00447824
dct-18	-0.319326	0.113076	0.0047428	0.0339726
nol-58	-0.318439	0.068971	3.89334e-06	7.26909e-05
mct-4	-0.317721	0.0864085	0.000236026	0.00275422
cir-1	-0.317398	0.100801	0.00163958	0.0142955
unc-52	-0.317299	0.0792883	6.28513e-05	0.000864009
ears-1	-0.316013	0.0703515	7.05883e-06	0.000124164
snx-1	-0.315933	0.117199	0.00702384	0.0462098
pat-10	-0.315929	0.0616023	2.92015e-07	6.83746e-06
pmp-1	-0.315733	0.100723	0.00172052	0.0148038
ZK1127.6	-0.315412	0.103949	0.00241104	0.0194682
nath-10	-0.315141	0.0877358	0.000328242	0.0037003
hpo-21	-0.314997	0.101914	0.00199601	0.016575
ndg-4	-0.314964	0.0909039	0.00053062	0.0055645
H43I07.3	-0.314923	0.118113	0.00766966	0.0493227
praf-3	-0.314606	0.108515	0.00374137	0.0278759
R106.8	-0.314401	0.105344	0.00284018	0.0222003
mspn-1	-0.313735	0.104155	0.00259365	0.0206785
col-178	-0.313046	0.11768	0.00781084	0.0498663
F57F5.1	-0.31279	0.0650461	1.51888e-06	3.11697e-05
epi-1	-0.31176	0.0793377	8.51092e-05	0.00113715
mma-1	-0.311748	0.0944533	0.000964951	0.00923753
T26E3.4	-0.31171	0.104749	0.00292245	0.022735
acl-7	-0.31073	0.099764	0.00184162	0.0156199
plrg-1	-0.309595	0.0943417	0.00103206	0.00975577
rnp-7	-0.309524	0.108856	0.00446321	0.0323594
Y45F10B.13	-0.309472	0.0995941	0.00188786	0.0158613
abcf-1	-0.30858	0.0795646	0.000105163	0.0013684
Y71H10B.1	-0.308563	0.0799178	0.000112919	0.00144908
lonp-1	-0.307957	0.105359	0.00346758	0.026122
let-504	-0.307348	0.0972481	0.00157526	0.0138714
mpst-1	-0.307344	0.112503	0.00629763	0.0424488
mrp-1	-0.307156	0.0958359	0.00135051	0.012193
F26G1.1	-0.307071	0.112228	0.00621648	0.0421005
elo-3	-0.306236	0.0822598	0.000197034	0.00236292
rpia-1	-0.305833	0.0909809	0.000775188	0.00771032
npl-4.2	-0.305503	0.0938409	0.00113177	0.0105447
sand-1	-0.304925	0.112436	0.00668815	0.0444932
csn-2	-0.304727	0.0941975	0.0012165	0.0111794
cogc-6	-0.303886	0.103331	0.00327249	0.0249551
lin-10	-0.303018	0.111935	0.0067876	0.0449663
mtr-4	-0.302374	0.101682	0.0029421	0.022838
nol-56	-0.302225	0.0599346	4.59289e-07	1.0347e-05
gna-2	-0.301849	0.107419	0.0049539	0.0352198
dao-5	-0.301361	0.0912432	0.000957123	0.00918105
art-1	-0.301063	0.082025	0.000242195	0.00281929
anat-1	-0.300657	0.100666	0.00282019	0.0220959
msi-1	-0.298953	0.10803	0.00565211	0.039094
xpo-3	-0.298923	0.104949	0.00439586	0.0320174
pafo-1	-0.29888	0.100729	0.00300543	0.0232287
cchl-1	-0.298864	0.0901532	0.000916201	0.00887795
rpb-3	-0.298744	0.0867213	0.000571327	0.00592611
F53H4.2	-0.297561	0.0950454	0.00174377	0.0149587
moma-1	-0.297169	0.086828	0.00062047	0.00633918
F49E2.2	-0.296957	0.102703	0.00383531	0.0285311
ugt-58	-0.296348	0.105814	0.00509981	0.0361313
T10B5.3	-0.29547	0.0893985	0.000949457	0.00911977
pat-2	-0.295446	0.101337	0.00355148	0.0266837
rpt-6	-0.295052	0.0909771	0.00118217	0.0109095
rbm-39	-0.294511	0.0937762	0.00168619	0.0146305
lam-1	-0.29437	0.0844622	0.000491716	0.00524901
C49H3.9	-0.294369	0.102206	0.00397472	0.0293671
rsp-7	-0.294133	0.08262	0.000370747	0.00412092
ubh-4	-0.294114	0.089475	0.00101222	0.00958725
smgl-1	-0.293854	0.105612	0.00539603	0.0376439
nra-4	-0.293571	0.0848609	0.000541302	0.00565633
ctc-2	-0.292544	0.0852194	0.000597306	0.00613322
nucb-1	-0.292307	0.109738	0.00772896	0.0495626
vpr-1	-0.291817	0.100468	0.00367759	0.0275155
dlc-1	-0.291794	0.082289	0.000391183	0.00431783
clic-1	-0.291739	0.0986108	0.00309153	0.0237783
oxa-1	-0.291156	0.0959615	0.00241257	0.0194682
pdi-3	-0.291018	0.0587265	7.21543e-07	1.56623e-05
F19B6.1	-0.290517	0.0774304	0.000175445	0.00213448
ile-1	-0.289645	0.0767112	0.000159507	0.00196062
Y45F10D.7	-0.289468	0.0890914	0.00115766	0.0107508
gfm-1	-0.288936	0.0730023	7.56096e-05	0.00102363
F07F6.4	-0.288279	0.0918137	0.00169049	0.0146335
bckd-1B	-0.287255	0.0751968	0.000133425	0.00168498
hsp-90	-0.286035	0.0565309	4.19683e-07	9.56034e-06
eif-3.F	-0.285121	0.0746965	0.000135054	0.00170074
T24H7.2	-0.284326	0.0772535	0.000232841	0.00271927
rpt-2	-0.283072	0.0690035	4.09081e-05	0.000592587
ZK1307.8	-0.282531	0.0791712	0.000358886	0.00400153
orc-1	-0.282092	0.105379	0.00742991	0.0483029
rbd-1	-0.282026	0.089515	0.00162934	0.0142335
ugt-22	-0.282024	0.0903209	0.0017934	0.0153018
pgam-5	-0.281991	0.085119	0.000923326	0.00892278
phb-2	-0.281573	0.0799952	0.000431748	0.00469529
mdf-1	-0.280596	0.0932253	0.00261359	0.020785
K04C2.2	-0.280235	0.0854298	0.00103696	0.0097956
edc-3	-0.280106	0.0939748	0.00287631	0.0224371
top-1	-0.280008	0.08448	0.000918126	0.00888455
exos-4.1	-0.279031	0.101615	0.00603314	0.0410927
ctps-1	-0.278952	0.0881331	0.00155016	0.0136757
Y62H9A.4	-0.278216	0.0889285	0.00175682	0.0150526
ZK792.5	-0.27806	0.10393	0.00746309	0.0484304
let-355	-0.27794	0.101152	0.0060007	0.0409108
hsp-110	-0.277312	0.0724022	0.000128058	0.0016215
Y39B6A.33	-0.277295	0.0925502	0.002734	0.0215347
mrps-18C	-0.276457	0.0958935	0.00393959	0.0291852
hpo-8	-0.276394	0.0818874	0.00073738	0.00739088
mig-22	-0.276316	0.0894536	0.00200878	0.0166424
C05D11.9	-0.275999	0.101815	0.00671248	0.0445908
lars-1	-0.275313	0.0624509	1.04104e-05	0.000176705
haf-9	-0.275227	0.10136	0.00662078	0.0441478
K05C4.5	-0.275048	0.0866548	0.0015032	0.0133286
pqn-22	-0.274821	0.0710806	0.000110486	0.00142568
K02F3.12	-0.274559	0.0969889	0.00464279	0.0334239
alh-6	-0.274531	0.0810677	0.000708054	0.00713197
C05D11.1	-0.273936	0.0839611	0.00110375	0.0103106
W08E12.7	-0.273832	0.0609128	6.94161e-06	0.000122253
mars-1	-0.273519	0.0683604	6.30397e-05	0.000864934
nol-2	-0.27277	0.077062	0.000400714	0.00441111
sin-3	-0.272473	0.0984008	0.00562268	0.038947
puf-5	-0.272417	0.078354	0.000507529	0.00538962
F56A8.3	-0.271041	0.0906983	0.0028046	0.0219979
ola-1	-0.271005	0.0693731	9.3649e-05	0.00124081
toe-1	-0.270899	0.0855241	0.00153745	0.0135887
ddx-27	-0.270291	0.0896947	0.00258286	0.020621
let-716	-0.269344	0.0804204	0.000810447	0.00800526
Y94H6A.5	-0.26931	0.0992818	0.00667621	0.0444551
T08B2.12	-0.269003	0.0754853	0.000365744	0.00406847
F41C3.5	-0.268952	0.0652004	3.70733e-05	0.000540877
pbs-6	-0.268722	0.0848932	0.00154862	0.0136706
F07H5.3	-0.268254	0.100459	0.00757894	0.0489531
rpt-4	-0.268233	0.0692667	0.000107737	0.00139638
Y61A9LA.10	-0.267648	0.082507	0.0011789	0.0108986
F19F10.9	-0.267387	0.0956476	0.00518126	0.0366537
larp-1	-0.266984	0.080914	0.000968232	0.00924415
nra-2	-0.266888	0.0790229	0.000731868	0.00734078
icd-1	-0.266604	0.0803704	0.000909274	0.00881681
kdin-1	-0.266125	0.0943615	0.00479837	0.0343019
F55B11.2	-0.266079	0.0715073	0.000198432	0.00237768
ctr-9	-0.265874	0.0961129	0.00567025	0.0391815
rpn-6.1	-0.265379	0.0950306	0.00522928	0.0368475
C16A3.6	-0.264646	0.0938896	0.00482198	0.0344189
tomm-40	-0.264028	0.0740619	0.000363904	0.00405116
dad-1	-0.263752	0.0989415	0.0076821	0.0493805
byn-1	-0.263372	0.0822642	0.00136696	0.0123104
eif-1	-0.262802	0.0787719	0.000849189	0.0083132
cct-1	-0.262756	0.0635568	3.56202e-05	0.000522881
F54B3.1	-0.26215	0.0974915	0.00716777	0.0470052
pfd-5	-0.261691	0.0945606	0.00564972	0.039094
ftn-2	-0.260486	0.0765586	0.000667862	0.0067653
wdr-46	-0.259033	0.0907112	0.00429586	0.031385
K12H4.3	-0.258493	0.0930425	0.00546572	0.0380443
F53E2.2	-0.258095	0.0668865	0.000113995	0.00146026
sart-3	-0.257715	0.0870729	0.00307882	0.0237061
C28H8.3	-0.257444	0.0850933	0.00248274	0.0199331
mrps-5	-0.256131	0.0918562	0.00529704	0.0371782
F27C1.6	-0.255417	0.0913563	0.00517663	0.0366392
ZK1058.9	-0.254188	0.0834785	0.00232716	0.0188643
eif-2alpha	-0.254046	0.0881933	0.00396973	0.0293476
dnj-29	-0.252609	0.0812391	0.00187434	0.0157849
gale-1	-0.251964	0.0945376	0.00769378	0.0494111
ubql-1	-0.25193	0.0837243	0.00262068	0.0207951
B0238.11	-0.251901	0.0913595	0.00582899	0.0400074
abce-1	-0.250831	0.0699482	0.000335849	0.00376525
fah-1	-0.25045	0.0815708	0.0021382	0.0175114
ran-4	-0.248014	0.090159	0.0059441	0.040583
him-17	-0.247969	0.0910088	0.00643668	0.043162
R166.2	-0.247148	0.0830272	0.00291361	0.0226909
deb-1	-0.246856	0.085132	0.00373539	0.0278604
mogs-1	-0.245481	0.0896677	0.00618762	0.0419648
ubc-18	-0.244168	0.0834605	0.00343845	0.0259711
hsp-60	-0.243722	0.0764025	0.00142285	0.0127255
sucg-1	-0.242758	0.0823037	0.00318243	0.0243203
nst-1	-0.240587	0.0783343	0.00213137	0.0174655
dars-1	-0.240203	0.0690023	0.00049938	0.00531098
imp-2	-0.238315	0.0811111	0.00330203	0.0251267
glt-1	-0.238292	0.0760151	0.0017197	0.0148038
ubc-13	-0.237385	0.0838273	0.00462821	0.0333357
skpo-3	-0.237082	0.0871532	0.00652244	0.0436551
ruvb-1	-0.236414	0.0855303	0.00570796	0.0393469
cct-5	-0.236302	0.0627945	0.000167818	0.00205218
rpt-5	-0.236096	0.0739543	0.00141069	0.0126325
Y18D10A.11	-0.235711	0.0877865	0.00725182	0.0473606
mtrr-1	-0.234653	0.084821	0.005667	0.039178
lbp-2	-0.234098	0.0675182	0.000525948	0.00553186
emb-8	-0.232239	0.0800447	0.00371537	0.02774
enol-1	-0.230688	0.0666842	0.000541357	0.00565633
gpi-1	-0.230644	0.0826737	0.00527399	0.0370893
rmd-1	-0.230542	0.0858302	0.00723082	0.0472451
ogdh-2	-0.23044	0.0787774	0.00344226	0.0259725
hpo-19	-0.229449	0.0771907	0.0029539	0.0229047
pdi-1	-0.228697	0.0764763	0.00278578	0.0218863
F44E7.4	-0.228185	0.0772241	0.00312828	0.0239706
act-2	-0.227684	0.0557599	4.44022e-05	0.000637383
rad-23	-0.227669	0.0692293	0.00100679	0.00955479
fasn-1	-0.227095	0.0830596	0.0062546	0.0422864
ZK809.8	-0.225952	0.0823905	0.00609814	0.0414958
ttr-14	-0.225546	0.0845647	0.00765005	0.0492692
hel-1	-0.225497	0.0692564	0.00113004	0.0105355
pdi-2	-0.224319	0.0690514	0.00115983	0.010764
pas-6	-0.22394	0.0751415	0.00288024	0.0224555
sao-1	-0.221382	0.0782851	0.0046855	0.0336974
sqd-1	-0.220632	0.0589063	0.000180055	0.00218127
uba-1	-0.216746	0.0717377	0.00251641	0.0201694
F53F4.11	-0.21522	0.0783166	0.00599448	0.0408882
sec-61	-0.213653	0.0627468	0.00066165	0.00671201
sgt-1	-0.212816	0.0694879	0.00219395	0.0179269
tbh-1	-0.212695	0.078228	0.00654963	0.0437755
cct-2	-0.212006	0.0629163	0.000752646	0.00750178
rpn-9	-0.21112	0.0675448	0.00177429	0.015184
gln-3	-0.210954	0.0685872	0.00210002	0.017278
rpl-32	-0.210789	0.0714769	0.00318746	0.0243458
nmt-1	-0.208791	0.0690407	0.00249319	0.0200058
arf-3	-0.208737	0.0764193	0.00630531	0.0424806
B0250.5	-0.208591	0.076351	0.006295	0.0424488
rpt-3	-0.206685	0.0745858	0.00558671	0.0387919
dhc-1	-0.206575	0.0661184	0.00178216	0.015224
tars-1	-0.206211	0.0762784	0.0068634	0.0454263
F23B12.7	-0.2054	0.0767425	0.00743996	0.0483242
rpt-1	-0.204296	0.0768016	0.00781309	0.0498663
anc-1	-0.203726	0.0724491	0.0049237	0.0350225
rpn-5	-0.202006	0.075041	0.00710386	0.0466288
myo-3	-0.201405	0.0756053	0.00772402	0.0495607
tkt-1	-0.2014	0.0646833	0.00184797	0.0156552
gsp-1	-0.200962	0.0679048	0.00308173	0.0237157
yop-1	-0.195486	0.0734227	0.007757	0.0496608
cdc-48.1	-0.192608	0.0722205	0.00765444	0.0492692
cct-6	-0.191649	0.0720636	0.00782696	0.0499296
copa-1	-0.185599	0.065894	0.00485294	0.0345881
R07H5.8	-0.184574	0.0662139	0.00531095	0.0372182
eif-2gamma	-0.171154	0.0637173	0.00722824	0.0472451
kat-1	-0.168133	0.0610474	0.00588456	0.0402342
eef-1G	-0.156653	0.0529661	0.00310028	0.0238328

## Sheet: 2
gene	log2FoldChange	lfcSE	pvalue	padj
catp-2	14.7473	1.18062	8.3471e-36	1.35479e-33
nhx-6	14.3707	1.18071	4.4262e-34	6.72547e-32
C02E7.10	11.9783	1.18439	4.81343e-24	4.61411e-22
ilys-3	9.03196	1.21382	9.99829e-14	4.87391e-12
F07C6.6	8.6392	1.20286	6.85946e-13	3.13015e-11
dod-3	8.16086	0.489675	2.32106e-62	1.03599e-59
F59A6.10	7.90783	1.25717	3.17087e-10	1.11004e-08
Y58A7A.4	7.6362	1.30603	5.00918e-09	1.50623e-07
fipr-26	7.53663	1.27939	3.84373e-09	1.17308e-07
C54F6.12	7.4752	1.29431	7.6761e-09	2.26993e-07
dct-19	7.22425	1.29578	2.47243e-08	6.75216e-07
B0563.10	7.17242	1.30012	3.4533e-08	9.27133e-07
Y49F6B.12	6.9709	1.32656	1.48134e-07	3.63539e-06
ZK970.7	6.90656	0.271017	2.97963e-143	5.31976e-140
nspe-6	6.66963	1.37704	1.27598e-06	2.64128e-05
T26H5.9	6.60291	0.886564	9.49389e-14	4.65984e-12
F14F9.3	6.49227	1.39371	3.18866e-06	6.04028e-05
K01A6.7	6.24796	1.42662	1.18913e-05	0.000196351
nas-10	6.18318	1.39104	8.78858e-06	0.000152154
F02H6.6	6.13931	1.45126	2.33357e-05	0.000359939
mltn-12	5.94518	0.920088	1.03647e-10	3.7669e-09
cnc-4	5.9283	0.886348	2.25533e-11	8.7535e-10
C50F7.5	5.62317	1.00264	2.04263e-08	5.70938e-07
H23N18.6	5.40503	1.2703	2.09104e-05	0.000326274
scl-2	5.12435	0.333389	2.58133e-53	7.52431e-51
catp-3	5.09404	0.0932906	0	0
str-144	5.0803	0.977227	2.00696e-07	4.82582e-06
clec-96	5.05966	1.43186	0.000409911	0.00448297
pitr-4	4.83369	0.983388	8.86267e-07	1.88934e-05
F26A1.8	4.80087	0.836377	9.46317e-09	2.76972e-07
mltn-9	4.75552	0.245916	2.57307e-83	1.67051e-80
grl-7	4.72865	0.664722	1.12951e-12	5.0415e-11
Y47H9C.1	4.72606	1.45366	0.00114936	0.0106808
dod-21	4.70214	1.63343	0.00399329	0.0294761
comt-4	4.61975	0.553414	6.95852e-17	4.41727e-15
fip-6	4.56763	0.332874	7.51713e-43	1.67761e-40
parg-2	4.32724	0.268902	2.89131e-58	1.03242e-55
C08F11.13	4.32199	0.146025	1.60648e-192	4.58906e-189
jud-4	4.26075	0.896867	2.02707e-06	4.01561e-05
R05H10.1	4.25436	0.332926	2.15682e-37	3.75681e-35
ZC239.22	4.15749	1.31762	0.00160326	0.0140746
C29F3.3	4.15401	0.840475	7.7145e-07	1.67111e-05
acdh-6	4.12569	1.28897	0.00137059	0.0123353
T22B7.3	4.12078	0.424106	2.56678e-22	2.2219e-20
T10C6.15	4.07664	0.925752	1.06472e-05	0.00017997
C06B3.7	4.00624	0.670938	2.35661e-09	7.4468e-08
cyp-37B1	3.89667	1.31494	0.00304276	0.023479
pitr-5	3.75025	0.163929	7.83822e-116	7.99666e-113
cyp-14A5	3.74495	0.111492	2.39245e-247	1.13904e-243
fipr-23	3.69572	1.28229	0.00394988	0.0292311
best-5	3.6041	0.438626	2.09e-16	1.30356e-14
his-13	3.57435	1.14992	0.00188129	0.0158155
his-9	3.57435	1.14992	0.00188129	0.0158155
cng-1	3.56808	0.368343	3.42969e-22	2.93331e-20
F01D5.6	3.49863	1.13435	0.0020406	0.0168324
cyp-32B1	3.45111	0.846653	4.57827e-05	0.000653262
trx-3	3.42543	0.43346	2.73292e-15	1.54286e-13
twk-45	3.41274	0.492433	4.19768e-12	1.7686e-10
M03A1.8	3.40118	0.827746	3.97446e-05	0.00057749
ilys-2	3.39623	0.461935	1.94997e-13	9.25294e-12
K02E11.10	3.39142	0.568031	2.36557e-09	7.45861e-08
Y34F4.2	3.38852	0.85403	7.25763e-05	0.000987245
far-3	3.37647	0.21761	2.69657e-54	8.27224e-52
str-31	3.357	1.18203	0.00451089	0.0325893
otpl-8	3.35016	1.1566	0.00377294	0.0280964
tag-297	3.31206	0.333731	3.26264e-23	3.00647e-21
F53A9.7	3.18181	0.358778	7.41607e-19	5.14193e-17
cpt-3	3.07671	0.828287	0.00020357	0.00242025
Y77E11A.14	3.02772	0.54993	3.67836e-08	9.84315e-07
col-79	3.01724	0.632856	1.86385e-06	3.74754e-05
pho-8	3.01108	0.230739	6.37646e-39	1.16763e-36
nlp-62	3.00213	0.709908	2.3484e-05	0.000361446
gst-13	2.96059	0.124339	2.59713e-125	3.37226e-122
Y45F10D.6	2.96011	0.245318	1.58847e-33	2.33898e-31
Y39A3A.4	2.93746	0.727506	5.39758e-05	0.000754341
col-113	2.90403	0.274285	3.40115e-26	3.70829e-24
ghi-1	2.89775	0.25743	2.15225e-29	2.87295e-27
oac-14	2.85403	0.360612	2.48467e-15	1.41954e-13
col-44	2.85036	0.751736	0.000149614	0.00185821
Y50D4A.6	2.84573	0.781372	0.000270559	0.00311644
F56D5.3	2.834	0.226178	5.11753e-36	8.40158e-34
C49G9.2	2.82219	0.381164	1.32006e-13	6.41305e-12
Y37E11B.7	2.81947	0.306314	3.43252e-20	2.594e-18
col-169	2.80872	0.198829	2.61563e-45	6.22651e-43
K01A12.4	2.80213	0.725493	0.000112285	0.00144275
T08G2.2	2.79204	0.903023	0.00198894	0.0165259
tts-1	2.77655	0.191942	1.99922e-47	5.00962e-45
Y69H2.3	2.77627	0.0797474	1.53043e-265	1.09295e-261
fipr-22	2.75092	0.264481	2.44879e-25	2.553e-23
C48D1.7	2.73385	0.94054	0.00365288	0.0273449
F57A8.7	2.72024	0.731583	0.000200576	0.00239535
C42D4.3	2.71312	0.137154	4.2957e-87	3.40864e-84
F38B7.2	2.71112	0.223108	5.62274e-34	8.45365e-32
T12B3.1	2.67377	0.692748	0.000113549	0.00145585
Y94H6A.2	2.64332	0.989055	0.00752719	0.0486915
mec-10	2.62037	0.385105	1.01553e-11	4.08588e-10
F33D4.6	2.60882	0.69623	0.000178918	0.00217303
daao-1	2.60658	0.417932	4.46446e-10	1.54772e-08
nhr-119	2.60205	0.154846	2.27584e-63	1.04858e-60
col-109	2.57233	0.267222	6.19954e-22	5.20871e-20
K08F9.1	2.56575	0.949616	0.00689489	0.0455925
col-173	2.5636	0.855679	0.00273558	0.0215347
T23B12.5	2.56036	0.824649	0.00190415	0.0159795
ora-1	2.55212	0.535905	1.91437e-06	3.82955e-05
T24C2.5	2.5174	0.286648	1.60312e-18	1.09035e-16
Y41G9A.10	2.50515	0.298186	4.41565e-17	2.81557e-15
kcc-2	2.494	0.0939156	2.20255e-155	4.49415e-152
F53A9.8	2.48105	0.359837	5.38851e-12	2.25041e-10
smf-3	2.48058	0.227655	1.2011e-27	1.45384e-25
Y39B6A.1	2.46226	0.0780936	3.41715e-218	1.22018e-214
clec-52	2.45137	0.16988	3.35147e-47	8.25329e-45
T06D8.10	2.43623	0.481131	4.11527e-07	9.38952e-06
K01D12.5	2.43074	0.684375	0.000382654	0.00424336
lpr-3	2.42578	0.723951	0.000805915	0.00797705
col-104	2.41298	0.239994	8.79348e-24	8.3177e-22
F53F1.6	2.41215	0.393477	8.76854e-10	2.91937e-08
M03A1.3	2.39498	0.394784	1.30692e-09	4.24245e-08
Y36E3A.2	2.39282	0.836436	0.00422659	0.0309582
lys-7	2.38705	0.108726	7.81764e-107	6.97871e-104
F14F9.4	2.37874	0.244992	2.7471e-22	2.36366e-20
fat-5	2.36702	0.171068	1.53145e-43	3.47202e-41
T24B8.5	2.35632	0.415575	1.42787e-08	4.0707e-07
adt-1	2.34976	0.759252	0.00196925	0.0163826
ZC513.14	2.34043	0.72873	0.00131973	0.0119833
T19B10.2	2.33003	0.141752	1.03215e-60	3.98438e-58
D1086.3	2.32408	0.208554	7.68086e-29	9.8834e-27
F57H12.6	2.31872	0.208273	8.65546e-29	1.1038e-26
ttr-26	2.30608	0.221485	2.18743e-25	2.29729e-23
T12D8.5	2.29814	0.358086	1.38225e-10	4.97298e-09
oac-20	2.29772	0.168377	2.12386e-42	4.52763e-40
ZK637.15	2.28915	0.838837	0.00635357	0.0427049
D2045.8	2.26984	0.344795	4.60523e-11	1.7174e-09
C45B2.2	2.25654	0.54272	3.21286e-05	0.000478014
str-7	2.25402	0.758488	0.00296134	0.0229375
H42K12.3	2.25237	0.787504	0.00423458	0.0309849
K11G9.1	2.23853	0.496674	6.57369e-06	0.000117072
ctl-1	2.23133	0.113057	1.05041e-86	7.89633e-84
F59E11.7	2.21885	0.391118	1.40246e-08	4.01431e-07
grl-22	2.21325	0.619154	0.000350708	0.00391647
col-97	2.20344	0.173428	5.53045e-37	9.40375e-35
M03F4.6	2.20331	0.424308	2.07259e-07	4.94203e-06
VZK822L.2	2.20288	0.732646	0.00264066	0.020942
clec-7	2.20255	0.20766	2.77786e-26	3.17409e-24
clh-2	2.19558	0.293155	6.91434e-14	3.42908e-12
grl-21	2.19246	0.168721	1.31388e-38	2.34576e-36
Y46H3A.4	2.18817	0.729944	0.00272001	0.0214646
F44E2.4	2.18726	0.354722	6.99792e-10	2.38547e-08
R12A1.3	2.18576	0.784156	0.00531316	0.0372182
Y54G2A.11	2.18458	0.117499	3.70194e-77	2.03365e-74
mlt-8	2.17805	0.361867	1.75583e-09	5.623e-08
ttr-38	2.176	0.742726	0.00339242	0.0256777
lgc-21	2.17179	0.396638	4.36293e-08	1.16044e-06
F21C10.10	2.16497	0.195951	2.22924e-28	2.81772e-26
col-14	2.15856	0.182494	2.79285e-32	3.98902e-30
catp-1	2.14601	0.129539	1.21629e-61	5.10948e-59
ugt-29	2.13835	0.109716	1.33884e-84	9.10602e-82
H20E11.2	2.13231	0.749129	0.0044218	0.0321244
Y58A7A.3	2.12035	0.136549	2.23962e-54	7.10854e-52
F41F3.3	2.1187	0.433126	1.00002e-06	2.10358e-05
F56C3.9	2.11393	0.647824	0.0011019	0.0103068
F13H8.5	2.10691	0.37595	2.09174e-08	5.83521e-07
abu-12	2.08912	0.78394	0.00770107	0.0494357
drd-50	2.08825	0.648108	0.00127268	0.01163
F13A7.11	2.07068	0.468684	9.95843e-06	0.000170547
rol-6	2.06727	0.548566	0.000164232	0.00201005
cut-2	2.05715	0.251704	3.01132e-16	1.85391e-14
nspe-7	2.05647	0.408263	4.72606e-07	1.06303e-05
F26G1.5	2.05561	0.193945	3.01332e-26	3.38892e-24
F35B3.4	2.04906	0.259105	2.61022e-15	1.48533e-13
ZK180.5	2.03795	0.224617	1.15811e-19	8.43946e-18
nas-30	2.03243	0.49256	3.68719e-05	0.000538489
lec-7	2.0321	0.736843	0.00581824	0.0399528
F25E5.2	2.02786	0.655246	0.0019694	0.0163826
col-115	2.02679	0.746064	0.00659473	0.0439946
T08B1.1	2.02087	0.084583	3.69644e-126	5.27962e-123
ptr-4	2.01381	0.422052	1.82876e-06	3.69451e-05
trhr-1	2.01144	0.390012	2.50452e-07	5.90297e-06
grl-5	2.01061	0.722645	0.00539766	0.0376439
F54B8.4	2.00292	0.52655	0.000142466	0.00178495
T19A5.3	2.00195	0.515696	0.000103583	0.00135359
Y38E10A.14	1.99832	0.166262	2.81963e-33	4.10947e-31
kin-15	1.99081	0.202531	8.38919e-23	7.48893e-21
pqn-32	1.98943	0.569377	0.000475744	0.00510906
W09G12.7	1.98165	0.456644	1.42742e-05	0.000231155
Y45G12C.1	1.98023	0.292319	1.25097e-11	4.99097e-10
Y47D7A.13	1.97762	0.16724	2.89662e-32	4.09628e-30
K04H4.2	1.97727	0.565279	0.00046898	0.00505161
bli-2	1.97456	0.604593	0.00109104	0.0102119
E01G4.6	1.97098	0.261733	5.05541e-14	2.55146e-12
F15E6.3	1.96814	0.373533	1.37178e-07	3.4075e-06
F45E4.5	1.96754	0.226409	3.61802e-18	2.43755e-16
C04A11.5	1.96514	0.56409	0.00049447	0.00526621
F17C11.11	1.95989	0.14062	3.75203e-44	8.64359e-42
F35E12.9	1.94796	0.211262	2.95569e-20	2.24554e-18
F11E6.11	1.92701	0.581338	0.000917129	0.00888091
cpr-1	1.92065	0.0719128	3.79533e-157	9.03479e-154
Y69H2.9	1.91553	0.47726	5.9797e-05	0.000824402
dpy-4	1.91012	0.235298	4.74391e-16	2.87107e-14
lys-2	1.9074	0.120071	7.97827e-57	2.77936e-54
argk-1	1.88141	0.15098	1.21251e-35	1.9031e-33
clec-41	1.86797	0.101982	6.09522e-75	3.22437e-72
R12E2.7	1.86653	0.348013	8.16764e-08	2.08319e-06
nnt-1	1.85046	0.508353	0.000272525	0.00313656
hsp-12.3	1.8494	0.361251	3.06485e-07	7.15282e-06
col-48	1.84377	0.231888	1.84803e-15	1.06433e-13
Y95B8A.2	1.84182	0.237155	8.08094e-15	4.3886e-13
F59B10.5	1.83792	0.549625	0.000825956	0.00812756
Y38E10A.28	1.83458	0.512902	0.00034775	0.00388648
F25E5.4	1.8333	0.345166	1.08808e-07	2.74092e-06
C26F1.1	1.8294	0.293966	4.8727e-10	1.673e-08
col-17	1.82098	0.34978	1.92866e-07	4.66108e-06
tbb-6	1.81862	0.366367	6.90781e-07	1.50174e-05
tre-5	1.81855	0.430852	2.43405e-05	0.000373823
F44A6.5	1.81565	0.259206	2.47573e-12	1.06509e-10
abu-13	1.8089	0.558542	0.00120111	0.0110609
Y57A10A.14	1.80212	0.407274	9.6518e-06	0.000166092
clec-54	1.79833	0.342046	1.45966e-07	3.60074e-06
K09C4.1	1.77805	0.590623	0.00260844	0.0207672
srr-4	1.77556	0.158815	5.1082e-29	6.63277e-27
clec-150	1.77149	0.0778267	1.09308e-114	1.04083e-111
nhx-4	1.77073	0.150223	4.53737e-32	6.35365e-30
Y43C5A.3	1.76627	0.160388	3.32711e-28	4.16852e-26
dpy-13	1.75721	0.227947	1.26971e-14	6.71677e-13
ZK1307.2	1.74448	0.586822	0.00295133	0.0228972
rol-8	1.74434	0.37936	4.2634e-06	7.89584e-05
lipl-2	1.74434	0.379485	4.29454e-06	7.92492e-05
cpr-4	1.73864	0.0747933	1.56383e-119	1.71817e-116
EGAP9.3	1.73859	0.626204	0.00549639	0.0382205
ttr-23	1.73834	0.453579	0.000126855	0.00160769
asns-2	1.72628	0.0883891	6.05357e-85	4.32315e-82
F22H10.2	1.72621	0.580178	0.00292689	0.0227571
ctl-2	1.7236	0.0899051	6.42794e-82	3.99175e-79
F13D11.4	1.72068	0.301087	1.09767e-08	3.19309e-07
col-71	1.71888	0.201541	1.48018e-17	9.65364e-16
F15E6.4	1.6988	0.518613	0.00105413	0.00992496
K04F1.9	1.69409	0.222689	2.7965e-14	1.45245e-12
thn-2	1.69176	0.123509	1.05114e-42	2.30975e-40
sqt-1	1.68888	0.383309	1.05269e-05	0.000178146
B0403.5	1.68443	0.232529	4.35689e-13	2.02044e-11
F28F5.6	1.68268	0.322922	1.88042e-07	4.55221e-06
T21C9.9	1.68135	0.239338	2.14043e-12	9.26416e-11
C42D4.1	1.67992	0.0810121	1.61919e-95	1.36041e-92
F21A3.11	1.67931	0.252158	2.74295e-11	1.05034e-09
ugt-5	1.67424	0.333073	4.99168e-07	1.1175e-05
clec-43	1.66931	0.322705	2.30511e-07	5.46e-06
F49F1.12	1.66083	0.517272	0.00132389	0.0120134
fmo-1	1.64963	0.271043	1.15597e-09	3.78686e-08
dao-2	1.64471	0.604286	0.00649389	0.0435048
clec-218	1.64377	0.106873	2.21068e-53	6.57815e-51
nas-9	1.64021	0.121925	2.9732e-41	6.0666e-39
Y32G9B.1	1.64001	0.572941	0.00420383	0.030823
K06A9.2	1.63198	0.356028	4.56483e-06	8.402e-05
M162.5	1.63068	0.210309	8.92258e-15	4.79102e-13
col-58	1.62828	0.588965	0.00569844	0.0393192
tep-1	1.62709	0.0915363	1.09679e-70	5.59481e-68
F22B7.9	1.61044	0.136149	2.77912e-32	3.98902e-30
Y54G11A.4	1.60536	0.516102	0.00186745	0.0157676
lon-3	1.60521	0.580828	0.00571582	0.039367
C06B3.6	1.60084	0.148632	4.74439e-27	5.50928e-25
alh-13	1.59757	0.204419	5.48836e-15	3.02665e-13
nas-38	1.59672	0.335433	1.93426e-06	3.85853e-05
dhs-5	1.59465	0.174592	6.62627e-20	4.95513e-18
F53B1.4	1.5934	0.444501	0.000337466	0.00378042
F01D5.5	1.58885	0.20405	6.88404e-15	3.78172e-13
hpo-26	1.58495	0.249295	2.04774e-10	7.25754e-09
ZK84.1	1.58478	0.166222	1.51173e-21	1.22682e-19
F23F12.12	1.58458	0.203845	7.63757e-15	4.17959e-13
F25A2.1	1.5837	0.566694	0.00519588	0.0367026
F17C11.13	1.58238	0.588778	0.00719766	0.047093
T27D12.1	1.57929	0.103648	2.00706e-52	5.51284e-50
T05E12.3	1.57476	0.345197	5.06907e-06	9.22312e-05
C27B7.9	1.57437	0.150445	1.25336e-25	1.32605e-23
R08F11.4	1.57312	0.423644	0.000204562	0.00242469
pho-9	1.57203	0.22984	7.93796e-12	3.24865e-10
T24C4.4	1.57194	0.435099	0.000302865	0.00343865
sqt-2	1.5709	0.405567	0.000107356	0.0013927
str-146	1.57024	0.513903	0.0022467	0.0183056
col-63	1.56823	0.270759	6.95588e-09	2.06981e-07
C06H2.7	1.56377	0.28096	2.60933e-08	7.09886e-07
rol-1	1.56104	0.198972	4.3122e-15	2.39654e-13
W01F3.2	1.55992	0.116572	7.74452e-41	1.53632e-38
ttr-37	1.55471	0.36853	2.45726e-05	0.000376983
tyr-6	1.55394	0.161697	7.24185e-22	6.04885e-20
hmbx-1	1.55296	0.269553	8.34895e-09	2.45366e-07
ttr-29	1.54734	0.31622	9.91818e-07	2.0894e-05
oac-32	1.54542	0.352076	1.13631e-05	0.00018938
Y58A7A.5	1.5389	0.312934	8.75885e-07	1.86999e-05
C04E6.7	1.53649	0.225935	1.04202e-11	4.16897e-10
Y43F8B.9	1.53621	0.399429	0.000120061	0.0015311
C25D7.2	1.53072	0.41902	0.000259113	0.00299912
grl-16	1.52922	0.189015	5.94311e-16	3.58166e-14
fbxa-51	1.5246	0.437289	0.0004894	0.00522819
tts-2	1.52376	0.221246	5.69023e-12	2.3626e-10
C28C12.4	1.52359	0.422831	0.000314208	0.00355613
dpy-5	1.52109	0.248413	9.17019e-10	3.03893e-08
F58E6.13	1.52083	0.539938	0.00485242	0.0345881
F42G4.5	1.52021	0.161782	5.63459e-21	4.47104e-19
col-111	1.51638	0.367193	3.63321e-05	0.000531148
F59B1.8	1.5157	0.254309	2.52086e-09	7.91329e-08
Y69H2.10	1.50854	0.472177	0.00139895	0.0125432
ZK909.3	1.50433	0.167517	2.70306e-19	1.92079e-17
ZK180.6	1.50369	0.27609	5.14084e-08	1.35724e-06
swt-6	1.50165	0.369079	4.72878e-05	0.000671384
fbxa-37	1.49723	0.42179	0.00038565	0.00426335
col-157	1.49634	0.369859	5.21633e-05	0.000731157
Y44A6C.1	1.49622	0.183289	3.26333e-16	2.00044e-14
oac-6	1.49515	0.378466	7.79699e-05	0.00104778
F55G1.15	1.49327	0.317491	2.55917e-06	4.93287e-05
ifc-1	1.49209	0.111674	1.02052e-40	1.99673e-38
Y51A2D.13	1.48162	0.112092	6.91427e-40	1.33455e-37
hlh-33	1.47772	0.314018	2.52805e-06	4.88608e-05
mlt-9	1.47644	0.516329	0.00424302	0.0310149
F47E1.2	1.4764	0.474708	0.00187004	0.0157676
Y48A6B.7	1.47376	0.447069	0.000978976	0.00931559
C04G2.14	1.47348	0.38914	0.000152781	0.00189096
C18H9.6	1.4719	0.184426	1.45173e-15	8.56818e-14
F41E7.1	1.47117	0.235032	3.86342e-10	1.34588e-08
C15A11.4	1.46919	0.273718	7.98174e-08	2.04307e-06
F31F7.1	1.46906	0.097286	1.6089e-51	4.33584e-49
lrp-1	1.46786	0.107458	1.76337e-42	3.8161e-40
col-138	1.46525	0.204815	8.42807e-13	3.82153e-11
C32H11.4	1.46363	0.188439	8.02936e-15	4.37723e-13
clec-48	1.46071	0.115545	1.24009e-36	2.05955e-34
col-73	1.45806	0.14762	5.2288e-23	4.78736e-21
sqt-3	1.45527	0.245092	2.89104e-09	8.99623e-08
F10E9.12	1.45323	0.272138	9.29252e-08	2.36165e-06
srd-14	1.44908	0.455949	0.00148206	0.0131725
E04F6.8	1.44034	0.180843	1.65777e-15	9.58619e-14
pqn-71	1.42853	0.52362	0.00636846	0.0427849
H06I04.6	1.42785	0.471837	0.00247692	0.0198976
C49G7.10	1.42651	0.279233	3.24428e-07	7.49806e-06
che-12	1.42553	0.411095	0.000525037	0.00553186
col-65	1.42441	0.273911	1.99006e-07	4.79326e-06
col-89	1.42223	0.342718	3.32709e-05	0.000492219
col-49	1.41382	0.248421	1.26121e-08	3.63916e-07
F32D8.7	1.40616	0.332072	2.29068e-05	0.000354089
F53E10.1	1.40527	0.252633	2.65965e-08	7.19464e-07
pqn-36	1.39042	0.301569	4.01441e-06	7.4756e-05
E04F6.15	1.38966	0.237668	5.00367e-09	1.50623e-07
acs-22	1.3837	0.130614	3.18355e-26	3.52485e-24
C16D9.4	1.3819	0.317935	1.38345e-05	0.000225569
T12A7.6	1.38111	0.318164	1.41911e-05	0.000230593
F01D5.1	1.37451	0.193295	1.15239e-12	5.12758e-11
nas-11	1.37191	0.0883336	2.14106e-54	6.95018e-52
dpy-6	1.37172	0.308456	8.70547e-06	0.000150898
cup-16	1.37054	0.366405	0.000183645	0.00221724
C04C11.23	1.36674	0.511546	0.00754482	0.0487614
erp-44.3	1.36593	0.315846	1.5277e-05	0.000244621
F53A9.9	1.35682	0.419861	0.00123098	0.011285
mlt-10	1.35481	0.427295	0.00152087	0.0134505
best-8	1.35394	0.489563	0.00568166	0.0392414
dhc-4	1.34951	0.257236	1.55277e-07	3.79764e-06
E01G4.5	1.34839	0.347465	0.000104174	0.00135759
abf-5	1.34527	0.31236	1.65643e-05	0.000263754
nhr-156	1.34109	0.291739	4.28878e-06	7.92452e-05
linc-82	1.33784	0.411264	0.00114193	0.0106186
acox-1.5	1.33437	0.109429	3.34978e-34	5.14461e-32
cth-1	1.33348	0.0802655	5.58181e-62	2.41591e-59
F13B12.3	1.33245	0.287563	3.5939e-06	6.74528e-05
H10E21.4	1.33204	0.323964	3.92779e-05	0.000571974
C25H3.10	1.33104	0.202892	5.3676e-11	1.9965e-09
endu-2	1.32894	0.0785396	3.17145e-64	1.50993e-61
ugt-51	1.32785	0.38353	0.000535821	0.00560669
cutl-24	1.32733	0.367106	0.000299578	0.00340404
F53F8.4	1.32658	0.134613	6.53815e-23	5.94805e-21
col-175	1.32116	0.216865	1.11439e-09	3.66748e-08
T06E4.8	1.32043	0.453712	0.00361092	0.0270592
tyr-1	1.3201	0.130957	6.74705e-24	6.42454e-22
Y71F9B.9	1.31668	0.342327	0.000119928	0.00153077
clec-265	1.31515	0.128331	1.20665e-24	1.20522e-22
F53F1.4	1.31499	0.370479	0.000386047	0.00426443
Y47D3B.6	1.31451	0.278372	2.33384e-06	4.5601e-05
fozi-1	1.31113	0.271214	1.33622e-06	2.75797e-05
col-91	1.3098	0.207835	2.93611e-10	1.03038e-08
max-1	1.30763	0.286002	4.82863e-06	8.84196e-05
ins-7	1.30658	0.458097	0.00434182	0.0316807
ztf-22	1.30625	0.175526	9.92453e-14	4.85452e-12
ttr-30	1.29864	0.213754	1.23683e-09	4.04248e-08
msp-42	1.28871	0.341759	0.000162723	0.001995
F59A7.2	1.2886	0.287773	7.54036e-06	0.000131984
Y51A2D.21	1.28427	0.285409	6.8037e-06	0.000120269
F56D2.5	1.28069	0.244389	1.60237e-07	3.90556e-06
C34E7.4	1.27901	0.156185	2.63265e-16	1.6278e-14
F25E2.3	1.27235	0.367198	0.000530162	0.00556378
math-38	1.27228	0.477958	0.0077701	0.0497001
col-167	1.2689	0.262873	1.3857e-06	2.85187e-05
Y105C5B.15	1.26683	0.0964193	1.97294e-39	3.70783e-37
R09A1.3	1.25563	0.45739	0.00604734	0.0411698
C34F11.8	1.25208	0.262727	1.88187e-06	3.76981e-05
nspc-5	1.24746	0.434374	0.00408074	0.0300252
M163.1	1.24724	0.17471	9.40639e-13	4.23822e-11
kqt-3	1.24487	0.272572	4.94476e-06	9.03147e-05
col-126	1.24257	0.155872	1.56516e-15	9.12457e-14
col-127	1.24257	0.155872	1.56516e-15	9.12457e-14
nhr-180	1.24131	0.328662	0.000158823	0.0019539
R07E3.7	1.23789	0.435276	0.00445634	0.0323425
best-7	1.23516	0.158001	5.39196e-15	2.98502e-13
F26F12.3	1.23411	0.107687	2.09118e-30	2.8446e-28
nas-4	1.23403	0.384155	0.00131669	0.0119633
F49F1.5	1.2334	0.463069	0.00773275	0.0495626
C06E7.4	1.22891	0.322786	0.000140544	0.00176396
W03F8.6	1.22744	0.437264	0.00499915	0.0354709
crh-1	1.22615	0.175693	2.97448e-12	1.26442e-10
M7.12	1.22555	0.317245	0.00011195	0.00144182
igeg-2	1.22419	0.459013	0.00765294	0.0492692
T07F12.4	1.22151	0.264983	4.03119e-06	7.49708e-05
dct-1	1.22082	0.230872	1.23744e-07	3.10622e-06
C14C6.5	1.2171	0.123513	6.58485e-23	5.95262e-21
nhr-96	1.21403	0.381667	0.0014684	0.0130767
nhr-58	1.21186	0.367349	0.000970532	0.00925375
cnc-10	1.21141	0.337444	0.000330748	0.00372267
Y66D12A.13	1.20956	0.207044	5.15688e-09	1.54739e-07
lys-4	1.20297	0.0829897	1.29582e-47	3.30502e-45
lys-1	1.20078	0.0802288	1.20642e-50	3.19099e-48
asp-13	1.19948	0.0690012	1.10008e-67	5.4181e-65
M7.8	1.19871	0.432967	0.0056298	0.0389774
C17H12.8	1.19672	0.115241	2.91757e-25	3.01969e-23
F13H10.6	1.19586	0.272132	1.11073e-05	0.00018647
T17H7.7	1.19444	0.372225	0.00133242	0.0120755
cbp-2	1.18834	0.238093	6.00527e-07	1.32162e-05
acl-12	1.18828	0.158642	6.8703e-14	3.41911e-12
nlp-42	1.18815	0.430745	0.00580937	0.0399111
F27D9.7	1.17901	0.404626	0.00357023	0.0268105
skr-3	1.17441	0.121297	3.59289e-22	3.0546e-20
gst-9	1.16739	0.410531	0.0044606	0.0323569
cebp-1	1.16546	0.244786	1.92496e-06	3.84535e-05
suro-1	1.1654	0.236291	8.1372e-07	1.75036e-05
lin-42	1.16175	0.423666	0.00610415	0.0415169
best-1	1.16097	0.338633	0.000607134	0.00621627
E04F6.6	1.15879	0.159032	3.18087e-13	1.48958e-11
col-98	1.15852	0.292924	7.65329e-05	0.00103124
C02E7.7	1.15167	0.421352	0.00627101	0.0423493
pqn-60	1.15091	0.207424	2.88036e-08	7.76231e-07
T15H9.4	1.14986	0.421829	0.00641291	0.0430228
F41C3.2	1.14349	0.192905	3.07173e-09	9.49643e-08
abu-15	1.1431	0.274359	3.09379e-05	0.000463271
pbo-4	1.14175	0.151334	4.53724e-14	2.30624e-12
col-186	1.14011	0.225121	4.0959e-07	9.36027e-06
T05A7.1	1.13838	0.161499	1.80394e-12	7.8554e-11
zip-2	1.12947	0.0840657	3.74187e-41	7.52748e-39
F08B12.4	1.12864	0.14296	2.90922e-15	1.62996e-13
clec-10	1.12781	0.100682	4.00366e-29	5.29483e-27
C44H9.5	1.12563	0.276557	4.69836e-05	0.000667729
T28H10.3	1.1251	0.138385	4.28465e-16	2.60416e-14
snt-6	1.12471	0.331888	0.00070191	0.00708007
abu-11	1.11248	0.303516	0.000247029	0.00287088
F55B11.4	1.10857	0.156618	1.46007e-12	6.41666e-11
nspb-1	1.10818	0.279714	7.43756e-05	0.0010098
acox-1.3	1.10747	0.292563	0.000153467	0.00189619
T22F7.1	1.10731	0.216686	3.21783e-07	7.44898e-06
F13D12.3	1.10687	0.147348	5.82366e-14	2.92885e-12
K08B5.1	1.10544	0.327689	0.000742343	0.00743019
B0281.3	1.10541	0.231376	1.77462e-06	3.59531e-05
Y69A2AL.2	1.10526	0.204242	6.24848e-08	1.63171e-06
Y54G2A.36	1.09628	0.308412	0.000378551	0.00420112
R05G6.10	1.09453	0.214018	3.15067e-07	7.32915e-06
nlp-31	1.09411	0.332412	0.000996821	0.00946649
dcar-1	1.09384	0.115865	3.70564e-21	2.97347e-19
ugt-66	1.09372	0.25683	2.05771e-05	0.000322261
E03H4.8	1.08895	0.227126	1.63089e-06	3.32793e-05
icl-1	1.08639	0.0665018	5.45659e-60	2.05096e-57
Y37E11AM.4	1.08594	0.163705	3.27698e-11	1.23496e-09
F47B8.2	1.08588	0.25502	2.06266e-05	0.000322684
acs-2	1.08265	0.115721	8.30455e-21	6.51725e-19
W01B11.6	1.08057	0.123574	2.24348e-18	1.51865e-16
nhr-202	1.08047	0.40598	0.0077816	0.0497514
T01D1.4	1.07896	0.143812	6.25818e-14	3.12537e-12
ttc-36	1.06879	0.137993	9.53782e-15	5.1022e-13
let-653	1.06676	0.275058	0.000105195	0.0013684
glc-1	1.06451	0.269007	7.58403e-05	0.00102578
grl-4	1.06179	0.108228	1.0132e-22	8.98852e-21
ZK550.6	1.05825	0.166917	2.29735e-10	8.08204e-09
F25E5.5	1.05645	0.254584	3.32902e-05	0.000492219
ugt-7	1.05147	0.241162	1.30048e-05	0.00021277
B0034.1	1.05083	0.239249	1.12215e-05	0.000187678
ZC443.3	1.04391	0.221973	2.56518e-06	4.93781e-05
C45E1.4	1.04286	0.318641	0.00106468	0.0100045
hrg-1	1.03895	0.326835	0.00147873	0.0131511
Y37E11AM.3	1.03824	0.106696	2.2277e-22	1.94014e-20
scl-5	1.03808	0.340421	0.00229304	0.0186194
col-107	1.03589	0.207057	5.64712e-07	1.25051e-05
T19C4.5	1.03582	0.301304	0.000586464	0.00604536
W02D9.10	1.03319	0.18388	1.92276e-08	5.39544e-07
ZC123.4	1.03164	0.251631	4.135e-05	0.000596568
cpr-3	1.03039	0.233441	1.01512e-05	0.000173432
clec-84	1.02919	0.150415	7.78985e-12	3.1972e-10
W05H9.1	1.02914	0.100341	1.1071e-24	1.12146e-22
gtl-2	1.02904	0.240739	1.91555e-05	0.000301651
M153.1	1.02822	0.383984	0.00741175	0.0482287
ift-43	1.02768	0.263219	9.45068e-05	0.00124868
F09F7.6	1.02734	0.384352	0.00751933	0.0486915
F43C11.7	1.0262	0.269149	0.000137425	0.00172689
hic-1	1.02598	0.380436	0.00700006	0.0460746
col-42	1.02452	0.273437	0.000179103	0.00217343
clec-173	1.02252	0.205947	6.8708e-07	1.49597e-05
epg-9	1.0191	0.15597	6.40536e-11	2.35793e-09
col-170	1.01877	0.223685	5.25188e-06	9.53147e-05
F13D11.3	1.01725	0.273472	0.00019942	0.00238701
K01A2.10	1.01334	0.371259	0.00634385	0.0426835
cah-3	1.01261	0.0965128	9.40736e-26	1.00273e-23
clec-4	1.01208	0.28245	0.000339401	0.00379911
C44E12.1	1.01145	0.333749	0.00244093	0.0196637
Y57G11C.42	1.01073	0.314222	0.00129707	0.0118301
C18E9.5	1.00873	0.119985	4.20086e-17	2.69062e-15
srsx-34	1.00872	0.180696	2.37194e-08	6.49012e-07
mef-2	1.00568	0.135836	1.32488e-13	6.41468e-12
nhr-11	1.00566	0.361652	0.00542354	0.0377875
Y39B6A.31	1.00309	0.352338	0.0044138	0.0321153
pqm-1	0.995514	0.120991	1.90399e-16	1.19275e-14
ubc-8	0.994608	0.226914	1.1695e-05	0.000193781
C16D9.1	0.994251	0.22635	1.12032e-05	0.00018759
F37A8.5	0.992546	0.3249	0.00225112	0.0183207
F49B2.6	0.989064	0.262958	0.00016903	0.00206523
hsp-43	0.988917	0.0813991	5.80758e-34	8.64059e-32
ZC204.12	0.986176	0.280855	0.00044587	0.00483551
F32A5.4	0.983586	0.109839	3.40468e-19	2.40738e-17
Y37A1A.2	0.982832	0.180896	5.53737e-08	1.45654e-06
B0303.11	0.981704	0.105526	1.36633e-20	1.06062e-18
lec-6	0.981561	0.113979	7.19404e-18	4.75706e-16
T10B5.2	0.980992	0.302287	0.00117356	0.0108633
col-154	0.980291	0.156254	3.52565e-10	1.23122e-08
B0416.7	0.972949	0.231237	2.5812e-05	0.00039388
DH11.2	0.97242	0.133603	3.37699e-13	1.57626e-11
ctl-3	0.972123	0.196797	7.82341e-07	1.6905e-05
tyr-2	0.972029	0.109147	5.30387e-19	3.71349e-17
asp-6	0.970418	0.0635078	1.03472e-52	2.95577e-50
lgc-22	0.970146	0.16108	1.71469e-09	5.50357e-08
tir-1	0.969954	0.156437	5.63659e-10	1.93063e-08
C38C3.8	0.968013	0.301024	0.0013011	0.0118489
M04C3.1	0.964769	0.18497	1.82998e-07	4.44518e-06
cdf-2	0.964538	0.285142	0.000717871	0.00722067
F41E7.2	0.963229	0.35946	0.00736985	0.0479779
sul-3	0.962706	0.20669	3.19715e-06	6.04832e-05
T10B10.8	0.961077	0.296245	0.0011778	0.0108954
ugt-54	0.959185	0.271921	0.0004196	0.00458542
ZK596.1	0.95496	0.20228	2.34714e-06	4.57981e-05
F53B2.8	0.953564	0.334995	0.00442027	0.0321244
F59B1.2	0.952138	0.130639	3.13868e-13	1.47733e-11
zipt-2.1	0.950803	0.156561	1.2551e-09	4.09282e-08
twk-34	0.950579	0.154392	7.41836e-10	2.51082e-08
D2030.2	0.950332	0.0948644	1.27314e-23	1.18079e-21
gbh-2	0.947281	0.1817	1.85375e-07	4.49527e-06
vap-2	0.946216	0.109791	6.79259e-18	4.51249e-16
F53A9.6	0.944426	0.287244	0.0010094	0.00957323
clec-49	0.941287	0.139496	1.5014e-11	5.9239e-10
F56C11.6	0.938171	0.290606	0.00124516	0.0114077
cpg-8	0.936314	0.136479	6.86263e-12	2.83292e-10
F35B3.7	0.934733	0.276732	0.000730805	0.00733527
F13H6.3	0.931375	0.164251	1.42445e-08	4.06907e-07
col-38	0.929058	0.153057	1.27887e-09	4.16084e-08
ZK593.3	0.927472	0.14407	1.21338e-10	4.38752e-09
ptr-12	0.926887	0.249342	0.000201335	0.00239839
ttr-18	0.925423	0.0857894	3.95907e-27	4.67334e-25
ivns-1	0.922223	0.0744263	2.92008e-35	4.53343e-33
F43G6.8	0.914739	0.24102	0.000147476	0.00183599
alh-4	0.914437	0.0718018	3.75104e-37	6.45496e-35
npa-1	0.914136	0.0954587	1.00639e-21	8.35712e-20
F36H12.10	0.913347	0.223662	4.43415e-05	0.000637152
clec-85	0.907202	0.171975	1.3262e-07	3.31155e-06
C09E9.1	0.904189	0.256523	0.000423829	0.00462456
zipt-16	0.903477	0.273836	0.000969139	0.00924664
K10H10.4	0.90101	0.313589	0.00406313	0.0299452
clec-62	0.9	0.155618	7.31996e-09	2.16911e-07
R06C1.6	0.899231	0.265332	0.000701281	0.00707872
Y54G2A.45	0.897523	0.233113	0.000118039	0.00150801
daf-5	0.895978	0.113632	3.14782e-15	1.75626e-13
ugt-24	0.894908	0.329857	0.00666734	0.0444168
F38E9.1	0.894668	0.149291	2.06308e-09	6.54822e-08
acox-1.6	0.893668	0.183911	1.17844e-06	2.45158e-05
gst-28	0.893561	0.176909	4.39578e-07	9.95006e-06
sago-2	0.892866	0.214403	3.12136e-05	0.000466831
C25E10.8	0.892745	0.234152	0.000137469	0.00172689
F20D1.3	0.889976	0.086834	1.19362e-24	1.20059e-22
C02D5.4	0.88956	0.117767	4.23587e-14	2.17629e-12
hsp-70	0.882472	0.326954	0.00695332	0.0458515
T28B8.1	0.880318	0.110384	1.5232e-15	8.95301e-14
K08C7.1	0.877355	0.199331	1.0751e-05	0.000181294
pgp-10	0.874578	0.254443	0.000587709	0.00604773
ZK822.2	0.873492	0.147268	3.00529e-09	9.31118e-08
C01B4.7	0.872487	0.267081	0.00108791	0.0101959
Y19D10A.4	0.872487	0.267081	0.00108791	0.0101959
T03D8.6	0.870502	0.183901	2.20647e-06	4.32305e-05
unc-17	0.867376	0.250117	0.000524586	0.00553186
lys-8	0.866342	0.0741299	1.4887e-31	2.06438e-29
C39E9.8	0.864758	0.0955713	1.45208e-19	1.04748e-17
spp-23	0.864367	0.180489	1.6759e-06	3.40982e-05
rgs-7	0.861748	0.177633	1.22663e-06	2.54282e-05
clec-117	0.86152	0.298635	0.00391585	0.0290546
timp-1	0.860569	0.198397	1.44033e-05	0.000232981
Y39D8A.1	0.860526	0.280132	0.0021273	0.0174545
clec-5	0.859659	0.125802	8.29079e-12	3.38335e-10
fmo-4	0.856574	0.116045	1.5666e-13	7.50862e-12
Y39G8C.2	0.856305	0.30731	0.00532879	0.0372853
W03D8.10	0.855773	0.212544	5.66543e-05	0.000786906
T20B3.1	0.852646	0.297002	0.00409376	0.0300623
nhr-41	0.852462	0.250357	0.000661661	0.00671201
C36F7.5	0.851914	0.162955	1.71441e-07	4.17154e-06
hpo-15	0.851424	0.0865559	7.82409e-23	7.0284e-21
ins-17	0.848828	0.270252	0.00168442	0.0146305
lin-1	0.848594	0.176418	1.50827e-06	3.09966e-05
Y57G11B.2	0.848311	0.312219	0.00658689	0.0439628
T01D3.6	0.843091	0.0825621	1.75947e-24	1.73314e-22
C35C5.8	0.840161	0.279176	0.00261736	0.0207951
cal-2	0.840043	0.261918	0.00134	0.0121182
F53C11.3	0.83867	0.124095	1.39604e-11	5.5388e-10
Y53F4B.45	0.83754	0.168241	6.4177e-07	1.40374e-05
M05B5.4	0.833484	0.168644	7.72199e-07	1.67111e-05
acn-1	0.831774	0.271481	0.00218512	0.017865
nhr-97	0.830553	0.098182	2.68951e-17	1.7382e-15
sod-4	0.829953	0.212157	9.15454e-05	0.00121519
F14H12.3	0.82863	0.263875	0.0016881	0.0146305
C09F12.2	0.828174	0.306817	0.00694971	0.0458488
C33D9.3	0.82478	0.182131	5.94054e-06	0.000106997
F54C9.3	0.822226	0.237125	0.000525353	0.00553186
acdh-7	0.8209	0.127263	1.11538e-10	4.0434e-09
dhs-21	0.819542	0.12676	1.01081e-10	3.68302e-09
col-77	0.817239	0.165729	8.17385e-07	1.7556e-05
nhx-9	0.817063	0.185856	1.10159e-05	0.000185323
ugt-26	0.816941	0.0909132	2.56535e-19	1.83204e-17
acox-3	0.81569	0.152232	8.40523e-08	2.13996e-06
ZK1073.1	0.812858	0.118608	7.21613e-12	2.97026e-10
Y43F8C.3	0.811903	0.25851	0.00168543	0.0146305
F37B12.1	0.811374	0.267471	0.0024173	0.0194843
vpat-1	0.810928	0.166014	1.03593e-06	2.16954e-05
F48D6.4	0.810499	0.113717	1.02317e-12	4.58119e-11
Y59C2A.1	0.809872	0.186761	1.44828e-05	0.000233738
pqn-54	0.809091	0.26932	0.00266276	0.0210939
F18G5.6	0.808979	0.149698	6.51434e-08	1.6948e-06
B0546.4	0.806799	0.174781	3.91101e-06	7.29255e-05
Y32F6B.1	0.80649	0.157598	3.09812e-07	7.21866e-06
lec-8	0.805884	0.119534	1.5633e-11	6.15112e-10
Y95B8A.6	0.805483	0.294176	0.00617946	0.0419294
H06A10.1	0.80539	0.172097	2.87075e-06	5.48901e-05
E04F6.9	0.80433	0.163952	9.30096e-07	1.97687e-05
C48E7.1	0.803377	0.0793647	4.38632e-24	4.23309e-22
nspc-2	0.802593	0.240221	0.000834591	0.00818713
nspc-6	0.802593	0.240221	0.000834591	0.00818713
col-13	0.801057	0.125034	1.48703e-10	5.3098e-09
cnp-3	0.801051	0.194825	3.92849e-05	0.000571974
C02F12.5	0.79836	0.210312	0.00014701	0.00183224
flp-5	0.797463	0.263321	0.00245783	0.0197664
nhr-88	0.796399	0.11423	3.12713e-12	1.32536e-10
Y51H4A.24	0.796211	0.179591	9.27278e-06	0.000160149
F45E1.4	0.795688	0.144994	4.07162e-08	1.08701e-06
cpt-1	0.795033	0.0727553	8.51778e-28	1.03982e-25
prk-2	0.793624	0.174242	5.24536e-06	9.53147e-05
msp-71	0.793204	0.270421	0.00335466	0.0254459
abu-14	0.792808	0.269095	0.00321707	0.0245587
Y43F8B.2	0.791137	0.116216	9.93095e-12	4.01824e-10
camt-1	0.79094	0.119146	3.17141e-11	1.19834e-09
pbo-1	0.790857	0.137007	7.81621e-09	2.30659e-07
nlp-9	0.788004	0.249657	0.00159759	0.0140421
pqn-72	0.787846	0.151694	2.06191e-07	4.92479e-06
C39D10.11	0.787057	0.27665	0.00444182	0.0322535
spp-1	0.786886	0.198797	7.55032e-05	0.00102316
sut-1	0.783966	0.20173	0.00010182	0.001333
mlk-1	0.780766	0.160847	1.20933e-06	2.51059e-05
R05D7.5	0.780281	0.184421	2.32671e-05	0.000359268
Y45G5AM.3	0.780052	0.183397	2.10594e-05	0.000328017
jmjd-3.1	0.778562	0.203888	0.000134224	0.00169356
tpra-1	0.778229	0.176416	1.02738e-05	0.0001749
F28H1.1	0.778162	0.268031	0.00369302	0.0276165
Y39G10AR.11	0.777896	0.122012	1.82253e-10	6.47542e-09
F42G4.6	0.775752	0.154573	5.20299e-07	1.15935e-05
mop-25.1	0.775664	0.0970222	1.29876e-15	7.6972e-14
nhr-117	0.773526	0.283407	0.00634532	0.0426835
T27E4.7	0.771956	0.258988	0.0028762	0.0224371
B0310.2	0.770999	0.267247	0.00391446	0.0290546
grd-6	0.769725	0.240685	0.00138352	0.012436
daf-7	0.768857	0.272796	0.00482592	0.0344299
Y57G11A.4	0.764631	0.153546	6.36424e-07	1.39418e-05
spch-2	0.763952	0.128109	2.47235e-09	7.7781e-08
srj-14	0.761895	0.275606	0.00570211	0.0393256
C31C9.2	0.76122	0.140833	6.47703e-08	1.68817e-06
T21H3.1	0.760358	0.0794762	1.09928e-21	9.02357e-20
T10G3.3	0.758665	0.162325	2.95766e-06	5.64009e-05
K10D6.2	0.758085	0.234329	0.00121586	0.0111794
brp-1	0.757949	0.0666413	5.66272e-30	7.63025e-28
col-166	0.756659	0.220007	0.000583317	0.00601989
T28F4.5	0.754238	0.083306	1.38034e-19	1.00078e-17
cyn-6	0.752843	0.167133	6.6542e-06	0.000118065
F37C4.5	0.749068	0.0694473	4.00275e-27	4.68617e-25
spp-2	0.748486	0.273731	0.00624976	0.0422858
Y4C6B.2	0.748317	0.226277	0.000942758	0.00906762
ptr-8	0.746779	0.146055	3.17109e-07	7.36467e-06
Y8A9A.2	0.745953	0.21346	0.000474805	0.00510282
abf-6	0.744741	0.214747	0.000524362	0.00553186
sip-1	0.74454	0.127269	4.91188e-09	1.48322e-07
F10D11.6	0.744216	0.178751	3.13496e-05	0.000468375
Y45F3A.9	0.742034	0.212062	0.000466777	0.00503443
ugt-25	0.742004	0.236832	0.00173003	0.0148587
ddo-1	0.740059	0.234635	0.00161002	0.014082
T28F3.8	0.739848	0.13103	1.63848e-08	4.63414e-07
drd-5	0.738287	0.170912	1.56255e-05	0.00024992
clec-186	0.737321	0.110412	2.42359e-11	9.35572e-10
Y62F5A.10	0.734229	0.270159	0.00657236	0.0438864
C17F4.7	0.733321	0.0667216	4.23311e-28	5.2122e-26
ZK616.65	0.732309	0.234964	0.00182894	0.01554
nep-1	0.72912	0.192344	0.000150214	0.00186404
sod-1	0.72759	0.102552	1.2951e-12	5.72691e-11
atg-2	0.727146	0.135103	7.35948e-08	1.89057e-06
wago-10	0.726928	0.230438	0.0016075	0.0140757
F58H1.7	0.726734	0.271417	0.00741616	0.0482355
Y37D8A.6	0.726724	0.236357	0.00210728	0.0173177
mnk-1	0.726462	0.094034	1.11394e-14	5.93674e-13
K08A2.4	0.725759	0.223882	0.0011882	0.010949
ZK673.1	0.725509	0.165102	1.11122e-05	0.00018647
aex-5	0.721304	0.164934	1.22392e-05	0.000201165
sbp-1	0.719535	0.109859	5.76784e-11	2.13425e-09
clec-63	0.716692	0.0676574	3.21268e-26	3.52975e-24
col-145	0.715996	0.116171	7.12458e-10	2.42287e-08
tos-1	0.711818	0.08803	6.1614e-16	3.69762e-14
sulp-4	0.711183	0.267245	0.00778701	0.0497637
pqn-75	0.710982	0.170785	3.14055e-05	0.000468719
C30G4.4	0.709975	0.189955	0.000185789	0.00224124
Y17G7B.8	0.709791	0.209949	0.000722822	0.00726535
spl-2	0.708099	0.259142	0.0062861	0.0424111
M05D6.1	0.708097	0.205665	0.000575386	0.00595956
unc-51	0.707121	0.124437	1.327e-08	3.81359e-07
F19C7.2	0.706934	0.253468	0.00528636	0.0371397
C34D10.2	0.706321	0.13966	4.24974e-07	9.65008e-06
col-10	0.706129	0.110067	1.40425e-10	5.03942e-09
F38B6.4	0.705274	0.118904	3.00223e-09	9.31118e-08
rhr-1	0.705249	0.0665689	3.16825e-26	3.52485e-24
col-60	0.703469	0.159767	1.06723e-05	0.000180181
Y77E11A.2	0.701634	0.161036	1.31853e-05	0.000215476
asp-12	0.698831	0.153119	5.01961e-06	9.15645e-05
dod-19	0.698645	0.0975877	8.11796e-13	3.69264e-11
ttr-27	0.694061	0.21918	0.00154222	0.0136225
sqst-1	0.693963	0.127089	4.74934e-08	1.2562e-06
T27F6.8	0.688052	0.246898	0.0053234	0.0372716
tyr-4	0.687265	0.0772894	5.99622e-19	4.17776e-17
sea-2	0.686665	0.111442	7.20085e-10	2.44299e-08
col-95	0.686558	0.177091	0.000105814	0.0013752
col-168	0.68616	0.158242	1.4501e-05	0.000233767
F54F7.2	0.686053	0.186135	0.000227999	0.00267312
cpi-2	0.685157	0.157281	1.32301e-05	0.00021596
ttr-51	0.684442	0.140219	1.05419e-06	2.20453e-05
F52E1.14	0.683815	0.0789317	4.57998e-18	3.07117e-16
aqp-9	0.683719	0.248112	0.00585681	0.0401405
mua-6	0.68365	0.0775973	1.2489e-18	8.53494e-17
add-2	0.68363	0.168299	4.86551e-05	0.00068806
ZK1037.6	0.683223	0.205589	0.000889755	0.00865104
F21D12.3	0.682491	0.150629	5.87237e-06	0.000105903
cysl-1	0.679675	0.117346	6.9526e-09	2.06981e-07
pes-4	0.678512	0.157396	1.62628e-05	0.000259823
tps-1	0.676622	0.138253	9.87612e-07	2.08361e-05
ztf-28	0.676284	0.173262	9.49142e-05	0.00125176
ipla-2	0.675575	0.196841	0.000598958	0.00614577
gba-1	0.674789	0.174377	0.000108965	0.00140974
Y38H8A.3	0.67292	0.122817	4.27626e-08	1.13951e-06
klp-20	0.672665	0.231752	0.00370168	0.0276522
col-34	0.669229	0.199207	0.000780915	0.00775647
sma-4	0.668867	0.151752	1.04508e-05	0.000177069
irg-5	0.668805	0.236748	0.00472865	0.0338882
Y37A1A.3	0.668072	0.226017	0.00311805	0.0239179
toh-1	0.667729	0.147075	5.62363e-06	0.000101803
Y48A6B.9	0.667719	0.241085	0.00561173	0.03889
B0454.6	0.667419	0.143672	3.39359e-06	6.40299e-05
sym-1	0.665488	0.231287	0.00401057	0.0295883
Y15E3A.4	0.662308	0.0945184	2.43163e-12	1.04927e-10
faah-2	0.661372	0.11824	2.22563e-08	6.12499e-07
endu-1	0.660988	0.152094	1.38685e-05	0.000225865
maoc-1	0.656338	0.141391	3.4505e-06	6.49321e-05
lea-1	0.653083	0.0650622	1.03946e-23	9.76752e-22
lgg-2	0.652437	0.0959118	1.0284e-11	4.12602e-10
dgat-2	0.65236	0.186443	0.000467032	0.00503443
acs-17	0.648664	0.110482	4.3257e-09	1.31176e-07
F11A5.9	0.646876	0.142657	5.77433e-06	0.000104398
F32B5.6	0.646675	0.0964917	2.05762e-11	8.0079e-10
Y52B11A.8	0.646639	0.157673	4.11141e-05	0.000593764
Y50D4B.1	0.644598	0.21921	0.00327628	0.0249707
col-130	0.644057	0.219656	0.00336664	0.0255224
col-88	0.643739	0.172008	0.000182205	0.00220172
nlp-77	0.643426	0.223338	0.00396469	0.0293256
lgg-1	0.64078	0.0701754	6.77961e-20	5.04339e-18
Y37D8A.16	0.640765	0.203131	0.00160808	0.0140757
Y20F4.4	0.640079	0.202916	0.00160831	0.0140757
C53D6.7	0.639661	0.14851	1.65339e-05	0.000263565
ttr-32	0.639407	0.190379	0.000783385	0.0077756
rimb-1	0.637925	0.163448	9.50399e-05	0.00125204
msp-63	0.637786	0.237577	0.00726296	0.0473917
C05D10.4	0.637701	0.153466	3.24827e-05	0.000482779
dhrs-4	0.63709	0.185771	0.000604851	0.00619734
cpl-1	0.636293	0.0624772	2.32762e-24	2.27708e-22
soc-2	0.635666	0.133695	1.98839e-06	3.94995e-05
sup-26	0.63316	0.129081	9.33638e-07	1.98145e-05
Y119D3B.13	0.632203	0.134222	2.47566e-06	4.81086e-05
F56D5.6	0.63166	0.147151	1.76596e-05	0.000279946
tbc-7	0.629809	0.139177	6.03303e-06	0.00010839
col-3	0.628601	0.0872947	5.98137e-13	2.76479e-11
col-120	0.628299	0.191563	0.00103862	0.00979829
cri-2	0.627217	0.174903	0.000335691	0.00376525
sulp-8	0.62645	0.234624	0.00758477	0.0489531
icmt-1	0.620744	0.207017	0.00271303	0.0214326
memo-1	0.617491	0.158819	0.00010107	0.00132439
col-125	0.615789	0.129847	2.1118e-06	4.1719e-05
msp-45	0.61576	0.121558	4.07202e-07	9.32852e-06
asp-5	0.614643	0.0643886	1.35014e-21	1.10195e-19
wht-4	0.612791	0.21721	0.00478454	0.0342373
Y53H1B.2	0.612021	0.127624	1.62272e-06	3.3253e-05
dlk-1	0.610621	0.105432	6.97228e-09	2.07037e-07
C30E1.9	0.609346	0.0807756	4.56879e-14	2.31404e-12
sta-2	0.609122	0.204246	0.0028609	0.0223413
lec-4	0.607826	0.112595	6.72629e-08	1.73415e-06
dod-23	0.607119	0.133059	5.04825e-06	9.19695e-05
rga-9	0.606847	0.181223	0.000812166	0.0080167
pqn-83	0.606838	0.0990167	8.86311e-10	2.944e-08
C25E10.5	0.606582	0.189807	0.00139448	0.0125109
Y48G1BR.1	0.602928	0.164389	0.000244745	0.00284666
ttr-44	0.601539	0.219515	0.00613816	0.0417284
clec-80	0.600889	0.174702	0.000582784	0.00601989
43252	0.600382	0.146345	4.08705e-05	0.000592587
cpg-7	0.6002	0.178888	0.000793167	0.00786176
B0334.3	0.597678	0.0786286	2.93221e-14	1.51742e-12
cbs-2	0.59704	0.191969	0.00187035	0.0157676
F09C3.2	0.595752	0.196123	0.00238438	0.0192734
ttr-6	0.595642	0.177274	0.000779412	0.00774693
sms-3	0.595195	0.190132	0.00174548	0.0149644
vab-19	0.595129	0.174156	0.000632655	0.0064527
ZK1225.4	0.594527	0.158703	0.000179557	0.0021771
C25A8.5	0.594205	0.179603	0.000938185	0.0090358
nkb-3	0.593163	0.0792523	7.18235e-14	3.54967e-12
ptr-23	0.592777	0.131106	6.14443e-06	0.000109976
gpa-12	0.592531	0.188108	0.00163296	0.0142523
mca-2	0.591743	0.100339	3.69187e-09	1.13157e-07
dao-3	0.591301	0.189622	0.00181888	0.0154914
Y92H12A.2	0.589331	0.127328	3.68385e-06	6.90504e-05
pfas-1	0.588359	0.11721	5.17492e-07	1.1549e-05
T16G1.7	0.587916	0.217119	0.00677292	0.0448899
F36A2.11	0.587721	0.220663	0.00773472	0.0495626
col-76	0.586322	0.203935	0.00403976	0.0297883
scrm-5	0.586159	0.165368	0.000393234	0.00433711
pho-7	0.584979	0.175126	0.000836762	0.0082028
C55A6.7	0.58462	0.210169	0.00540811	0.0376984
M176.4	0.584456	0.146388	6.53774e-05	0.000894431
F55D12.6	0.583971	0.21365	0.00627011	0.0423493
acdh-10	0.58242	0.127334	4.78603e-06	8.78648e-05
C05C8.7	0.582106	0.107806	6.6804e-08	1.72855e-06
Y53F4B.18	0.58112	0.125733	3.80301e-06	7.10973e-05
ZK6.11	0.578407	0.074516	8.34811e-15	4.51652e-13
C49C3.9	0.578336	0.163625	0.000408532	0.00447817
F26A3.4	0.577673	0.101542	1.278e-08	3.68017e-07
feh-1	0.577119	0.193825	0.00290592	0.0226434
lem-3	0.574053	0.122222	2.64246e-06	5.07972e-05
ges-1	0.573263	0.15695	0.000259686	0.00300331
zmp-3	0.573138	0.111234	2.56969e-07	6.0466e-06
atic-1	0.572752	0.110853	2.3818e-07	5.63233e-06
F19C7.1	0.572735	0.10461	4.37645e-08	1.16187e-06
nep-23	0.571914	0.189673	0.00256755	0.0205217
Y71G12B.30	0.571581	0.19906	0.0040866	0.0300252
ugt-44	0.57069	0.17642	0.00121711	0.0111794
tag-260	0.569279	0.128647	9.63914e-06	0.000166075
Y55B1BR.2	0.568802	0.186675	0.00231118	0.0187454
igcm-3	0.567167	0.152097	0.000192251	0.00230944
nex-2	0.567059	0.12853	1.02468e-05	0.000174649
crtc-1	0.563792	0.172156	0.00105703	0.00994573
B0304.4	0.563646	0.200683	0.0049752	0.0353536
W06B4.2	0.561609	0.160906	0.0004825	0.00516221
C52A10.1	0.561366	0.164418	0.000639535	0.00651068
tub-2	0.561352	0.14945	0.000172563	0.00210659
unc-49	0.561079	0.146703	0.000130989	0.00165568
pho-11	0.559621	0.0877308	1.78428e-10	6.35534e-09
M117.4	0.559443	0.183575	0.00230757	0.0187267
Y66D12A.11	0.558331	0.194435	0.00408451	0.0300252
rcan-1	0.556835	0.149856	0.000202558	0.00241095
hda-4	0.556636	0.145807	0.000134747	0.00169867
flp-18	0.55635	0.208158	0.00752357	0.0486915
C18B12.4	0.556036	0.138963	6.2989e-05	0.000864934
F17H10.2	0.554812	0.126474	1.15054e-05	0.000191084
W09D6.1	0.554372	0.187733	0.00314725	0.0241031
D2045.5	0.553989	0.204786	0.00682611	0.0452005
B0454.5	0.553509	0.195165	0.00456672	0.0329261
cdc-37	0.55123	0.0979067	1.80048e-08	5.06225e-07
Y48G9A.9	0.551144	0.115605	1.86551e-06	3.74754e-05
Y73F4A.3	0.549137	0.193406	0.00452133	0.0326152
F15A4.6	0.548072	0.162614	0.000750629	0.00748765
H34I24.2	0.544772	0.0956577	1.23362e-08	3.56676e-07
hlh-30	0.544689	0.109603	6.70699e-07	1.46253e-05
akt-2	0.544686	0.176321	0.00200712	0.0166386
asp-3	0.544274	0.0581235	7.67019e-21	6.05267e-19
R09E10.1	0.542597	0.201538	0.00709664	0.0466288
hmit-1.1	0.541309	0.177832	0.00233501	0.0189097
W09D6.5	0.540659	0.122477	1.01304e-05	0.000173284
spp-10	0.5405	0.0998794	6.249e-08	1.63171e-06
pqn-74	0.540194	0.144577	0.0001867	0.00225033
C05D12.3	0.538448	0.0985489	4.6615e-08	1.23526e-06
asp-1	0.537676	0.0659863	3.6908e-16	2.25281e-14
nep-17	0.535487	0.0738575	4.15934e-13	1.93511e-11
T12B3.3	0.535296	0.0901268	2.8614e-09	8.92345e-08
fbxl-1	0.534878	0.135398	7.80211e-05	0.00104778
ida-1	0.533506	0.128826	3.45362e-05	0.000509062
ZK484.7	0.533048	0.171318	0.00186163	0.0157521
T27C4.1	0.531363	0.146487	0.000286309	0.00326887
ced-1	0.528058	0.117711	7.25586e-06	0.000127394
Y1A5A.1	0.526613	0.185473	0.00452128	0.0326152
Y54E2A.9	0.52574	0.169255	0.0018951	0.0159128
dhs-18	0.525135	0.166227	0.00158235	0.0139252
rop-1	0.524603	0.0894059	4.42e-09	1.33752e-07
fkh-7	0.524432	0.185488	0.00469422	0.0337261
snt-5	0.523755	0.177455	0.00316247	0.0241937
afd-1	0.522716	0.104659	5.89938e-07	1.30233e-05
ztf-16	0.521903	0.194642	0.00733252	0.0477784
Y25C1A.13	0.520742	0.141183	0.000225646	0.00265259
elb-1	0.520612	0.187103	0.00539442	0.0376439
tppp-1	0.520314	0.167713	0.00191956	0.0160696
F17C11.26	0.519674	0.144845	0.000333476	0.00374747
F18C5.10	0.519422	0.140899	0.000227363	0.00266838
ced-6	0.518098	0.111191	3.16925e-06	6.01148e-05
efhd-1	0.516731	0.155482	0.000889217	0.00865104
col-39	0.512934	0.126255	4.85147e-05	0.000686755
atg-9	0.511348	0.122028	2.78464e-05	0.000423118
set-26	0.510369	0.111599	4.80276e-06	8.80588e-05
tth-1	0.50785	0.187375	0.00672156	0.0445908
swm-1	0.507442	0.188108	0.00698391	0.0460107
asah-1	0.50255	0.10506	1.72299e-06	3.49566e-05
F46G10.2	0.502392	0.180068	0.00527064	0.037084
R148.5	0.501746	0.169436	0.00306366	0.0236149
Y47G6A.21	0.501466	0.134817	0.000199545	0.00238701
F17C11.4	0.500542	0.122765	4.5572e-05	0.000650905
Y66H1A.5	0.499502	0.144045	0.000524972	0.00553186
hlh-11	0.497318	0.091325	5.16361e-08	1.36073e-06
mboa-4	0.496265	0.177914	0.00528137	0.037123
CC8.2	0.496065	0.1443	0.000586632	0.00604536
F36A4.4	0.495409	0.185088	0.00743693	0.0483242
Y51H1A.3	0.495227	0.110033	6.77235e-06	0.000119863
ZK673.2	0.494528	0.091278	6.03277e-08	1.58394e-06
daf-22	0.493194	0.126286	9.40809e-05	0.00124422
ttr-34	0.492548	0.132678	0.000205349	0.002432
pho-4	0.492469	0.139731	0.000424446	0.00462776
pghm-1	0.492287	0.159805	0.00206614	0.0170287
gst-36	0.48728	0.111575	1.25804e-05	0.000206298
srap-1	0.485174	0.107168	5.97655e-06	0.00010751
T02E1.6	0.484634	0.146604	0.000947245	0.00910464
aqp-1	0.483732	0.116601	3.34512e-05	0.000494089
K07C11.7	0.483678	0.113795	2.13378e-05	0.000331641
F22B8.7	0.483197	0.147787	0.00107721	0.010109
F55G11.4	0.482685	0.154401	0.00177098	0.0151648
tbc-14	0.482393	0.119066	5.08985e-05	0.000714832
F35E12.6	0.481472	0.116557	3.615e-05	0.000529254
oac-46	0.481467	0.139924	0.000579747	0.00600038
Y70G10A.3	0.477871	0.129048	0.000213021	0.00252078
metr-1	0.477088	0.0675537	1.63709e-12	7.15061e-11
col-144	0.475707	0.126673	0.000173067	0.00211094
fat-6	0.474802	0.0660261	6.42599e-13	2.9512e-11
Y73C8B.3	0.474568	0.147717	0.00131504	0.0119559
msp-31	0.474423	0.127239	0.000192544	0.00231102
C55C3.3	0.472133	0.134841	0.000462802	0.00500394
ZK228.4	0.470538	0.124304	0.000153469	0.00189619
abts-1	0.469514	0.0913225	2.72889e-07	6.40011e-06
M01H9.3	0.469352	0.089171	1.41335e-07	3.50466e-06
F54D5.3	0.468693	0.106949	1.17377e-05	0.000194264
C18D11.1	0.468605	0.133101	0.000430449	0.00468963
F53H2.3	0.468164	0.122115	0.000126183	0.0016006
tiar-2	0.468006	0.167181	0.0051199	0.0362556
kin-20	0.467595	0.124929	0.000181927	0.00220049
clec-119	0.466478	0.153251	0.00233541	0.0189097
tag-196	0.465995	0.11017	2.33933e-05	0.000360438
cat-4	0.465137	0.10127	4.36872e-06	8.05141e-05
M60.4	0.464192	0.121616	0.000135149	0.00170074
C26B9.1	0.46412	0.171177	0.006701	0.0445372
F40G12.10	0.463985	0.158165	0.00335107	0.0254397
ZK1320.2	0.463783	0.0985142	2.50429e-06	4.8533e-05
W09D10.4	0.462077	0.0925438	5.9428e-07	1.30989e-05
nac-3	0.460974	0.119341	0.000112162	0.00144275
col-150	0.459224	0.157883	0.00363009	0.0271885
far-6	0.459035	0.104072	1.03015e-05	0.000175162
snt-4	0.458618	0.133418	0.000587185	0.0060467
atp-4	0.458255	0.10797	2.193e-05	0.000340094
F16A11.1	0.457327	0.108472	2.48598e-05	0.000380979
C02B10.6	0.456563	0.158355	0.00393716	0.0291824
lit-1	0.45643	0.109294	2.96484e-05	0.000447641
rbg-1	0.451546	0.161928	0.0052943	0.0371772
C17H11.6	0.451521	0.144625	0.00179614	0.0153159
mlp-1	0.45141	0.108345	3.09431e-05	0.000463271
C18E9.8	0.451144	0.153363	0.00326437	0.0249065
F42A10.7	0.450363	0.102582	1.13214e-05	0.000188906
K12C11.1	0.450004	0.0994898	6.0937e-06	0.000109217
plc-3	0.449393	0.142925	0.00166513	0.014493
F22F7.7	0.448723	0.168131	0.00761016	0.0490727
phat-4	0.44791	0.123383	0.000283169	0.0032356
gei-4	0.447792	0.099319	6.52505e-06	0.000116351
mrp-3	0.447692	0.153781	0.00360011	0.0270148
W02B12.12	0.447215	0.102237	1.2182e-05	0.00020065
ttr-59	0.446416	0.0990935	6.63724e-06	0.000117921
clec-83	0.446072	0.11728	0.000142685	0.00178613
pod-1	0.445118	0.0726979	9.19192e-10	3.03908e-08
dlg-1	0.445039	0.139883	0.00146508	0.0130705
irg-4	0.444288	0.139855	0.00148926	0.0132283
F10D7.5	0.444263	0.134156	0.000927859	0.00895447
ard-1	0.443553	0.127893	0.000524046	0.00553186
C34D4.2	0.442565	0.164638	0.00718595	0.047038
sipa-1	0.442212	0.155665	0.00450021	0.0325504
ebp-2	0.44085	0.106228	3.32415e-05	0.000492219
smp-1	0.440703	0.137412	0.00134052	0.0121182
msp-38	0.43778	0.101166	1.5091e-05	0.000242184
ttr-41	0.437218	0.14882	0.0033044	0.0251314
Y17G7B.10	0.436217	0.0988417	1.01811e-05	0.000173735
ZK632.4	0.436203	0.0854388	3.3002e-07	7.61499e-06
clp-4	0.435895	0.127759	0.000645218	0.00655918
kel-20	0.435351	0.136822	0.00146322	0.0130701
pqn-94	0.435178	0.150089	0.00373799	0.0278652
cTel55X.1	0.432598	0.159608	0.0067207	0.0445908
taf-13	0.429898	0.155932	0.00583421	0.040024
F49C12.12	0.429821	0.15404	0.00526558	0.0370667
vhp-1	0.429157	0.146372	0.00336839	0.0255224
R10F2.6	0.427861	0.154449	0.00560131	0.0388555
ZK550.2	0.427115	0.144468	0.00311195	0.0238839
ZC477.7	0.427004	0.123276	0.000532596	0.00557703
scav-2	0.426996	0.0973373	1.15048e-05	0.000191084
C16B8.3	0.426895	0.137513	0.00190666	0.0159845
hil-5	0.426739	0.121924	0.000465182	0.00502207
K09E4.1	0.425729	0.128864	0.000954159	0.00915877
swsn-1	0.425161	0.114489	0.000204358	0.00242469
dod-24	0.424718	0.114759	0.000214781	0.0025395
aak-2	0.424353	0.117815	0.000315949	0.003573
Y49E10.10	0.423723	0.142558	0.00295591	0.0229079
mpst-4	0.422545	0.14863	0.00446995	0.0323754
T13F2.9	0.422263	0.10769	8.81483e-05	0.00117556
Y34B4A.9	0.420967	0.106816	8.11321e-05	0.00108706
hil-4	0.419459	0.107401	9.40092e-05	0.00124422
F36A2.10	0.418097	0.140578	0.0029382	0.0228202
ZK899.2	0.416861	0.141299	0.00317559	0.024281
mob-2	0.414019	0.125453	0.000966193	0.00924322
tac-1	0.413501	0.120513	0.000600976	0.00616205
dgk-2	0.413425	0.12844	0.00128717	0.0117474
cgp-1	0.413098	0.0816634	4.22455e-07	9.60816e-06
aakb-2	0.411803	0.154017	0.00750069	0.0486302
F58G1.3	0.410369	0.136219	0.0025904	0.0206697
ttr-46	0.410074	0.118606	0.000545302	0.00568092
pqn-41	0.409955	0.111329	0.00023109	0.00270325
W10C8.5	0.409701	0.0713843	9.50325e-09	2.77577e-07
F21F3.6	0.407712	0.0902	6.18145e-06	0.0001105
yap-1	0.407202	0.14503	0.00498963	0.0354209
egl-8	0.407178	0.113441	0.000331517	0.0037284
pqn-52	0.406807	0.0890432	4.90879e-06	8.97724e-05
cnp-2	0.406386	0.12263	0.000920015	0.0088968
C05D2.8	0.405386	0.111006	0.00026027	0.00300764
atm-1	0.404447	0.130963	0.0020133	0.0166701
C53B7.3	0.403384	0.109415	0.000227143	0.00266799
abts-4	0.403188	0.144638	0.0053104	0.0372182
slrp-1	0.402735	0.0972176	3.43377e-05	0.000506658
F01D5.8	0.402661	0.140804	0.00423994	0.0310082
nduo-6	0.402082	0.129764	0.00194463	0.0162143
col-155	0.401756	0.141302	0.00446567	0.0323608
rpl-25.1	0.401486	0.123604	0.0011615	0.0107725
asp-2	0.401397	0.0716385	2.10566e-08	5.8626e-07
obr-2	0.401184	0.116826	0.00059465	0.00611035
sup-1	0.401001	0.137147	0.00345714	0.0260572
T08B6.9	0.400711	0.129081	0.001907	0.0159845
rsr-1	0.399533	0.102644	9.9254e-05	0.00130298
alh-7	0.398731	0.113061	0.000420806	0.00459509
Y51A2D.18	0.397955	0.109539	0.000280133	0.00320604
clec-123	0.397487	0.10241	0.000103889	0.00135635
mib-1	0.395239	0.120033	0.000992103	0.00942795
ant-1.4	0.39346	0.142857	0.00588325	0.0402342
apx-1	0.392502	0.109705	0.000346494	0.00387547
let-2	0.389578	0.125635	0.00192953	0.0161167
clp-7	0.38901	0.135533	0.00410192	0.0301067
Y62E10A.13	0.388915	0.106971	0.000277234	0.00317866
osm-7	0.38891	0.132288	0.00328355	0.0249995
set-9	0.386219	0.104622	0.00022288	0.00262873
C36H8.1	0.385507	0.113144	0.000656284	0.00666693
xbp-1	0.381372	0.0772482	7.93434e-07	1.70929e-05
aman-1	0.380217	0.104008	0.000256542	0.00297418
anmt-2	0.379552	0.110138	0.000568644	0.00590258
jac-1	0.379209	0.12913	0.00331792	0.0252074
msp-64	0.379101	0.0889772	2.03834e-05	0.000319579
tat-4	0.378761	0.109217	0.00052442	0.00553186
K02D7.1	0.378122	0.0806047	2.71782e-06	5.21056e-05
fshr-1	0.377251	0.137823	0.00619614	0.0420026
ant-1.3	0.375355	0.101868	0.000228948	0.00268038
vha-1	0.375344	0.0899612	3.01559e-05	0.000453387
mesp-1	0.374071	0.0910248	3.96425e-05	0.000576593
F35E12.10	0.37319	0.107641	0.000526346	0.00553186
mca-3	0.37217	0.0726954	3.06212e-07	7.15282e-06
T08B6.4	0.370263	0.0839916	1.0417e-05	0.000176705
F01G4.4	0.367461	0.114491	0.00132952	0.0120569
ing-3	0.367381	0.109254	0.000772068	0.00768463
ppw-2	0.364851	0.0809883	6.63783e-06	0.000117921
spe-26	0.36437	0.130912	0.00538058	0.0375799
C35B1.5	0.362563	0.127093	0.00433458	0.0316517
ifb-2	0.362509	0.067123	6.63955e-08	1.7211e-06
mml-1	0.359226	0.131873	0.00644921	0.0432257
pgrn-1	0.359132	0.133779	0.00726321	0.0473917
spsb-1	0.358434	0.104844	0.00062912	0.00642296
F02D8.4	0.358307	0.0971266	0.000225071	0.00264801
vnut-1	0.357086	0.132649	0.00710328	0.0466288
F13D12.6	0.356666	0.0677796	1.42384e-07	3.52455e-06
pgal-1	0.355919	0.132387	0.00717776	0.0470275
maph-1.2	0.35556	0.0893404	6.8962e-05	0.000940768
cnt-1	0.352616	0.117427	0.00267461	0.021176
K03B4.2	0.351845	0.108396	0.00117073	0.0108511
Y32F6A.5	0.350863	0.077267	5.60101e-06	0.000101522
mvk-1	0.350617	0.0826975	2.23767e-05	0.000346269
ccg-1	0.349389	0.105215	0.000897872	0.00871809
pcyt-2.1	0.34836	0.113411	0.00212881	0.0174545
myo-2	0.346573	0.0691071	5.3031e-07	1.17982e-05
wwp-1	0.345927	0.0730221	2.16587e-06	4.24932e-05
unc-71	0.345302	0.115079	0.00269489	0.0213247
par-3	0.345235	0.0788444	1.19396e-05	0.000196921
R11D1.1	0.344649	0.129566	0.00781354	0.0498663
LLC1.2	0.343123	0.103586	0.000924873	0.00893169
lim-8	0.340153	0.123397	0.00584112	0.0400522
T22C1.8	0.33821	0.118582	0.00434298	0.0316807
pezo-1	0.337316	0.102318	0.000978093	0.0093134
C08F8.3	0.337273	0.0992408	0.000677503	0.00685809
lact-3	0.33672	0.120621	0.00524575	0.0369453
Y119D3B.14	0.336427	0.113399	0.00300973	0.0232493
gln-2	0.334506	0.0950197	0.000430923	0.00469122
fat-7	0.334348	0.108405	0.00204065	0.0168324
T04H1.2	0.334321	0.0906086	0.000224499	0.00264346
R08E3.1	0.333596	0.0990364	0.000756013	0.00753008
F42A10.6	0.333588	0.11136	0.00273917	0.0215438
frl-1	0.333559	0.113773	0.0033701	0.0255224
dot-1.1	0.332139	0.113522	0.00343622	0.025968
eppl-1	0.331449	0.0843074	8.444e-05	0.00112927
Y59E9AL.3	0.331363	0.105521	0.00168796	0.0146305
zig-11	0.33032	0.0833856	7.4527e-05	0.00101089
miz-1	0.330103	0.113217	0.00354935	0.0266818
rga-4	0.330066	0.0963503	0.000613236	0.00626976
emb-9	0.329994	0.119849	0.00589758	0.0403039
wdr-23	0.327583	0.104226	0.00167218	0.0145455
hmr-1	0.32744	0.092526	0.000401796	0.00441111
taf-2	0.32733	0.113058	0.00378887	0.0282003
hrpl-1	0.324842	0.118243	0.00600999	0.0409545
F56A11.6	0.324157	0.114968	0.00480912	0.0343615
lipl-5	0.324141	0.111662	0.00369758	0.027636
ncx-2	0.323995	0.0777107	3.05607e-05	0.000458506
uda-1	0.322168	0.0884358	0.000269527	0.00310707
lbp-9	0.321382	0.107684	0.00284055	0.0222003
K08C9.2	0.319859	0.10888	0.00330646	0.0251337
F34D10.4	0.319636	0.101776	0.00168616	0.0146305
allo-1	0.319544	0.0969405	0.000979697	0.00931626
F17H10.1	0.318084	0.0994786	0.00138617	0.012452
K06G5.1	0.317777	0.0946663	0.00078846	0.00782054
tbc-17	0.316958	0.119044	0.00775581	0.0496608
lec-1	0.315972	0.0792263	6.65724e-05	0.000909907
snf-3	0.315686	0.0918615	0.000589197	0.00605868
egl-21	0.315682	0.101255	0.00182263	0.0155049
klp-7	0.314092	0.086514	0.000282829	0.00323431
mlt-7	0.31304	0.110204	0.00450367	0.0325536
C01B10.6	0.311828	0.100164	0.0018509	0.0156707
Y59E9AL.2	0.311491	0.0972573	0.00136122	0.0122741
msp-40	0.309783	0.10909	0.00451576	0.032608
spch-3	0.30891	0.0991607	0.0018379	0.0155976
cpn-1	0.308497	0.0746734	3.60741e-05	0.000529
nipa-1	0.308124	0.114239	0.00699277	0.0460479
dhs-28	0.307864	0.0772921	6.80164e-05	0.000928756
C05D2.10	0.307776	0.100575	0.00221208	0.0180647
dhs-6	0.306561	0.112779	0.006563	0.0438444
tnt-3	0.305379	0.0817824	0.000188429	0.00226925
zyg-8	0.303119	0.107222	0.00469847	0.0337397
apl-1	0.301192	0.081943	0.000237262	0.00276638
chat-1	0.30098	0.0871782	0.000555475	0.00577967
tfg-1	0.300794	0.0868253	0.000531508	0.00556972
F33E11.2	0.299975	0.112443	0.00763517	0.0492117
ech-4	0.29875	0.102129	0.00344197	0.0259725
ZK829.7	0.298392	0.0741738	5.74907e-05	0.000795678
svh-2	0.296953	0.108058	0.00599453	0.0408882
ape-1	0.294622	0.0943379	0.00178989	0.0152809
pyc-1	0.292643	0.0770784	0.000146636	0.00182917
Y54G2A.18	0.292642	0.0976644	0.00273186	0.0215337
sago-1	0.291625	0.109022	0.00747449	0.0484823
F58D2.2	0.291403	0.105201	0.00560617	0.0388704
ule-1	0.290961	0.103616	0.00498376	0.0353969
ntl-3	0.290541	0.0945359	0.00211674	0.0173855
Y34B4A.6	0.290473	0.086806	0.000819181	0.00808036
W03D8.9	0.289658	0.087536	0.000936255	0.0090233
vha-19	0.288086	0.0719151	6.17758e-05	0.000850042
lron-7	0.288084	0.086432	0.000858933	0.00839708
fat-2	0.287001	0.0598984	1.65564e-06	3.3734e-05
spch-1	0.286616	0.0819586	0.000470373	0.0050628
F23C8.5	0.286297	0.0907408	0.00160439	0.0140757
kin-1	0.286232	0.0816825	0.000457986	0.00495938
inos-1	0.285522	0.102754	0.00545777	0.0380075
T16A9.5	0.285446	0.0846931	0.000750705	0.00748765
C50E10.1	0.28539	0.106359	0.00729032	0.0475469
dpf-2	0.285204	0.104498	0.00634738	0.0426835
rps-4	0.283879	0.0916051	0.00194213	0.0162029
dbn-1	0.282258	0.0907341	0.00186568	0.0157676
acdh-12	0.28208	0.088541	0.00144321	0.0128995
snb-1	0.279515	0.102033	0.00615413	0.0417773
rpl-4	0.279435	0.0821073	0.000665799	0.00674919
ipla-3	0.278558	0.104323	0.00758162	0.0489531
T04C9.1	0.277237	0.0925182	0.00273035	0.0215337
hphd-1	0.27668	0.0614642	6.74822e-06	0.000119584
cah-4	0.274979	0.0684854	5.94103e-05	0.000820655
nurf-1	0.271503	0.0846788	0.00134467	0.012148
F46H5.3	0.27005	0.0896547	0.0025944	0.0206785
tps-2	0.269706	0.0976952	0.00576799	0.0396841
rps-2	0.26951	0.073925	0.000266645	0.00307632
F58F12.1	0.268955	0.0683525	8.32568e-05	0.00111449
icp-1	0.268798	0.100192	0.00730047	0.0475913
K07E3.4	0.266054	0.0865203	0.00210472	0.0173067
hmg-1.1	0.265636	0.095394	0.00535901	0.0374475
W06H8.6	0.26405	0.0800914	0.000977727	0.0093134
mig-6	0.263761	0.0681528	0.000108773	0.00140852
catp-7	0.263683	0.0980761	0.00717621	0.0470275
vha-6	0.263601	0.0667051	7.7588e-05	0.00104448
vha-20	0.26069	0.0746473	0.000478895	0.00513019
dpf-5	0.260051	0.0761269	0.000635433	0.00647353
fln-1	0.25797	0.0629953	4.22052e-05	0.000607678
hxk-3	0.257672	0.0953493	0.00688418	0.0455427
ost-1	0.256137	0.0829144	0.00200717	0.0166386
unc-54	0.255962	0.0682344	0.000175981	0.00213919
pgk-1	0.255493	0.0847137	0.00256171	0.020498
gsp-4	0.254188	0.0843226	0.00257427	0.0205639
F22D6.2	0.253522	0.0786242	0.00126203	0.0115549
ZK370.4	0.253119	0.0899537	0.00489476	0.0348688
sms-1	0.253099	0.0918657	0.00586739	0.0401914
nex-1	0.252177	0.0684874	0.000231322	0.00270374
F32A11.3	0.250328	0.0895559	0.00518647	0.0366725
F53F4.10	0.249753	0.0866014	0.00392739	0.0291251
Y69E1A.1	0.248967	0.0738364	0.000746583	0.00745696
myo-1	0.247433	0.0744886	0.000894522	0.00869147
unc-108	0.247151	0.0776973	0.00146796	0.0130767
F28B4.3	0.245691	0.0839221	0.00341581	0.0258411
vha-14	0.245646	0.0870302	0.00476448	0.0341108
vha-13	0.240895	0.0730053	0.000967921	0.00924415
alh-8	0.239767	0.0574736	3.02245e-05	0.00045394
cyk-4	0.239766	0.0777407	0.00204115	0.0168324
ifc-2	0.23951	0.0644059	0.000200209	0.00239295
plin-1	0.238999	0.0744946	0.00133534	0.0120866
vha-4	0.237557	0.0756892	0.00169767	0.014669
R04F11.2	0.236693	0.0762982	0.00192083	0.0160696
C04G2.9	0.235546	0.068105	0.000543039	0.00566147
nhr-49	0.233384	0.0841662	0.00555607	0.0385979
vha-15	0.231211	0.0753289	0.00214527	0.0175574
prg-1	0.228896	0.0769117	0.00291948	0.0227242
vha-5	0.227765	0.0713854	0.00141959	0.0127043
F21H7.5	0.219921	0.079525	0.0056848	0.039244
lec-2	0.216375	0.0649645	0.000866382	0.00845833
top-2	0.202832	0.0712509	0.00441708	0.0321228
mex-3	0.200641	0.074027	0.00672069	0.0445908
pck-2	0.193786	0.0545656	0.000383153	0.0042456
eef-1A.1	0.193112	0.0555183	0.00050452	0.00536165
pfk-1.1	0.192948	0.0685746	0.00489761	0.0348717
F25B5.3	0.191595	0.067929	0.00479466	0.0342925
bcat-1	0.187719	0.067686	0.00554767	0.0385583
gdh-1	0.149526	0.0558792	0.00745349	0.0483901

## Sheet: 3
Name	gene	log2FoldChange	lfcSE	pvalue	padj
C54C8.12	dos-1	-2.24564	0.243477	2.88304e-20	4.0723e-17
nlp-39	rpl-37	-1.94758	0.22989	2.416e-17	2.73008e-14
C17H12.8	hmit-1.1	-1.93084	0.211592	7.15324e-20	8.98129e-17
fipr-26	his-24	-1.76101	0.23139	2.72886e-14	2.56967e-11
C08F11.12	C06E8.5	-1.75877	0.352959	6.26256e-07	0.000141534
F01D5.1	amt-1	-1.66314	0.251823	3.99154e-11	1.80418e-08
Y45F10C.2	abu-1	-1.64706	0.332425	7.24476e-07	0.000157434
clec-209	pgph-2	-1.55782	0.137729	1.16039e-29	3.27809e-26
dod-24	hil-3	-1.54052	0.322404	1.76852e-06	0.000338717
catp-3	F22B5.6	-1.41471	0.406788	0.00050565	0.0278724
F56A4.2	argk-1	-1.3581	0.184023	1.58227e-13	1.11748e-10
C32H11.4	slc-25A29	-1.34191	0.376044	0.000359054	0.0209139
T24B8.5	fipr-6	-1.33978	0.293194	4.88629e-06	0.000736201
lys-2	pqn-2	-1.29471	0.327633	7.75997e-05	0.006643
F59A7.2	ugt-53	-1.25929	0.227951	3.30574e-08	9.33871e-06
clec-47	abu-8	-1.2478	0.279525	8.04472e-06	0.00108221
oac-32	fipr-8	-1.24258	0.308807	5.72626e-05	0.00537571
tyr-3	C42D4.3	-1.22495	0.174489	2.21536e-12	1.25168e-09
K08D8.5	fipr-11	-1.22286	0.285605	1.85514e-05	0.00216115
C17H12.6	grd-6	-1.21534	0.275283	1.01071e-05	0.00131276
K07A1.6	T21C9.9	-1.20481	0.302694	6.8832e-05	0.00602947
F35E12.5	ttr-49	-1.14098	0.288908	7.8381e-05	0.00665944
str-144	pgph-3	-1.12799	0.094545	8.19095e-33	3.08526e-29
dod-17	gpdh-1	-1.09369	0.162574	1.72761e-11	8.87364e-09
fipr-22	gst-4	-1.07171	0.147493	3.69844e-13	2.45838e-10
E02H4.8	abu-14	-1.07037	0.297464	0.00032028	0.019149
comt-4	aqp-8	-1.06867	0.0873274	1.95982e-34	1.1073e-30
scl-19	ugt-17	-1.02055	0.178228	1.02775e-08	3.51925e-06
K08D8.4	nhr-3	-1.01737	0.233224	1.28766e-05	0.00163489
T02B5.1	cth-1	-0.980906	0.0893107	4.60951e-28	1.04175e-24
asp-18	col-175	-0.961559	0.253119	0.000145372	0.0107366
K10D11.2	K11G9.5	-0.949351	0.253973	0.000185487	0.0127805
fipr-23	C33A12.19	-0.926115	0.170121	5.214e-08	1.43703e-05
K04F1.9	fipr-10	-0.916797	0.235768	0.000100843	0.00796873
F55G11.8	fipr-7	-0.914578	0.240924	0.000146976	0.0107846
col-183	col-120	-0.912417	0.211896	1.66261e-05	0.00195703
F15E6.10	fipr-4	-0.884512	0.261749	0.000726867	0.0354034
F55G11.2	F22F7.8	-0.879169	0.20196	1.3417e-05	0.00168458
grsp-1	B0205.13	-0.875549	0.264498	0.000932187	0.0421348
clec-67	col-145	-0.863179	0.128481	1.83818e-11	9.03106e-09
R09E10.13	nduo-3	-0.851759	0.225115	0.000154539	0.0112664
C02F12.5	math-20	-0.840607	0.258043	0.00112348	0.0471946
Y9C9A.16	ugt-30	-0.829543	0.199255	3.1379e-05	0.00325305
far-3	col-60	-0.826149	0.1765	2.85851e-06	0.000468133
F53H4.2	poml-3	-0.820525	0.166269	8.01837e-07	0.000170958
dod-22	grl-21	-0.809477	0.203174	6.77178e-05	0.00600512
C05C12.1	thn-2	-0.798952	0.137011	5.50022e-09	2.07175e-06
clec-3	col-162	-0.796872	0.197656	5.53965e-05	0.00530492
cnc-4	col-38	-0.778807	0.172359	6.22768e-06	0.000890795
Y39G8B.7	F44A2.3	-0.761321	0.229889	0.000927319	0.0420832
F49F1.1	F58B4.5	-0.757765	0.119648	2.39969e-10	1.02926e-07
ZK970.7	ZC190.4	-0.719594	0.213169	0.000736289	0.0356333
K11H12.4	col-107	-0.716944	0.219183	0.00107172	0.0459827
swt-6	irx-1	-0.710112	0.20885	0.000673603	0.0342714
Y110A2AL.3	col-88	-0.698872	0.182654	0.000130132	0.00986909
H39E23.3	T20G5.8	-0.698769	0.193807	0.000311565	0.0189284
clec-85	col-77	-0.695553	0.173302	5.98174e-05	0.0054511
Y45F10D.6	sst-20	-0.691832	0.167229	3.51817e-05	0.00356266
scl-20	ZC21.3	-0.682725	0.120592	1.50093e-08	4.71126e-06
T20G5.8	F17E9.4	-0.676062	0.106811	2.4593e-10	1.02926e-07
F01D5.3	col-126	-0.674954	0.1727	9.29656e-05	0.00748855
F15E6.4	col-127	-0.674954	0.1727	9.29656e-05	0.00748855
H29C22.1	K10D3.6	-0.635127	0.192683	0.0009799	0.0435891
fipr-24	sodh-1	-0.631114	0.0945512	2.47514e-11	1.16538e-08
pud-3	F41E6.12	-0.623291	0.134085	3.34394e-06	0.000532204
H25K10.4	fipr-2	-0.614707	0.115391	9.97511e-08	2.56179e-05
F54D5.4	osm-7	-0.604605	0.139362	1.43537e-05	0.00175128
F01D5.2	F21D5.3	-0.602284	0.110862	5.54935e-08	1.49304e-05
F41E7.1	tre-3	-0.601476	0.14776	4.6887e-05	0.00456744
clec-70	C53D6.10	-0.591122	0.166945	0.000398901	0.0226511
F17E9.2	cpr-4	-0.590131	0.0787079	6.4927e-14	4.89117e-11
dct-7	F37C12.18	-0.579886	0.17414	0.000868491	0.0403433
Y54G2A.49	best-24	-0.575132	0.173061	0.000889634	0.0408653
F35E8.10	col-150	-0.561467	0.165998	0.000718605	0.0353054
mltn-9	gstk-1	-0.553946	0.161673	0.00061178	0.0320052
T05E12.6	C35A5.3	-0.551723	0.116347	2.11568e-06	0.000389936
C08F11.13	F46C5.10	-0.548622	0.16485	0.0008747	0.0403433
F35E8.13	F26A3.5	-0.546783	0.141283	0.000108781	0.0084774
dod-6	C15F1.1	-0.536625	0.133403	5.75629e-05	0.00537571
olrn-1	ule-4	-0.521516	0.126086	3.53113e-05	0.00356266
C37A5.5	F53F1.2	-0.5145	0.1064	1.32805e-06	0.000271432
ttr-26	col-144	-0.512278	0.128312	6.53976e-05	0.00586502
col-50	B0218.7	-0.505827	0.118564	1.98761e-05	0.00226869
F56D6.8	T08B6.9	-0.499875	0.135526	0.000225656	0.015269
fbxa-127	T19H5.4	-0.495933	0.151238	0.00104115	0.0456007
ugt-63	W06A7.4	-0.491115	0.143078	0.000598043	0.0317148
C37A5.3	F59E11.5	-0.490897	0.141787	0.00053575	0.0291056
clec-265	ttr-17	-0.488197	0.148578	0.00101695	0.0447142
F36G9.7	ttr-14	-0.485816	0.0857697	1.47721e-08	4.71126e-06
M199.9	tyr-2	-0.48323	0.116611	3.41385e-05	0.00350695
oac-6	C33G8.2	-0.47351	0.139948	0.000715746	0.0353054
fip-6	ZC116.1	-0.47204	0.129916	0.00027967	0.0176051
Y51H7C.1	Y37A1B.5	-0.463094	0.0819341	1.58564e-08	4.84263e-06
nlp-33	gtl-1	-0.45039	0.135299	0.00087206	0.0403433
dct-8	tatn-1	-0.445101	0.0863757	2.56243e-07	5.90927e-05
pud-1.1	F41H10.1	-0.444657	0.0949428	2.8212e-06	0.000468133
asp-5	ugt-47	-0.444517	0.111601	6.80226e-05	0.00600512
F01D5.5	col-39	-0.434433	0.126843	0.000614851	0.0320176
K10C2.8	F52E1.14	-0.431983	0.082054	1.40479e-07	3.37748e-05
cpi-1	K10B2.4	-0.43022	0.130155	0.000948227	0.0426891
col-70	fkh-9	-0.425603	0.118801	0.000340328	0.0201346
fbxa-105	Y73F4A.2	-0.419937	0.123683	0.000685588	0.0342794
lips-14	C41G7.6	-0.419106	0.107317	9.41039e-05	0.00748855
pud-2.1	pqn-31	-0.412808	0.126166	0.00106815	0.0459827
F56C3.9	acs-2	-0.405299	0.123933	0.00107429	0.0459827
pud-2.2	F07H5.3	-0.397232	0.101087	8.5091e-05	0.00712243
folt-2	mtrr-1	-0.396005	0.08552	3.64688e-06	0.000572357
clec-65	Y97E10C.1	-0.388356	0.118188	0.00101648	0.0447142
oac-14	rig-6	-0.387467	0.103091	0.000170931	0.0120858
F35E12.8	F18C12.3	-0.385445	0.108166	0.000366013	0.02121
tag-244	C56A3.5	-0.383661	0.113714	0.000741046	0.0356333
pud-1.2	fbxa-72	-0.378426	0.110319	0.000602928	0.0317148
C08F11.11	R13H4.2	-0.377276	0.10343	0.000264653	0.0168959
col-116	ZK822.5	-0.37129	0.110149	0.000749528	0.0358884
asp-12	T05E12.6	-0.364719	0.0968161	0.000165135	0.0118103
lys-8	aagr-2	-0.361492	0.076834	2.54058e-06	0.00044167
clec-186	gpdh-2	-0.359237	0.0927717	0.000107825	0.0084613
F07G6.10	F26B1.8	-0.357021	0.0886813	5.67614e-05	0.00537571
asp-14	C04F12.7	-0.352536	0.084297	2.88863e-05	0.00305061
Y73F4A.3	ugt-62	-0.351346	0.0779147	6.50201e-06	0.00091841
Y110A2AL.9	ZK1058.9	-0.351284	0.084093	2.94945e-05	0.003086
F52H3.6	cth-2	-0.350266	0.0831518	2.52713e-05	0.00277248
F56D6.9	F53H4.2	-0.34813	0.0953749	0.000262119	0.0168292
cyp-35B1	C14F11.4	-0.336355	0.102014	0.000976755	0.0435891
clec-11	clec-1	-0.321826	0.0959053	0.000791759	0.0375919
F38B7.2	R06C1.4	-0.319359	0.0882258	0.000294841	0.0182383
C15A11.4	lys-4	-0.318117	0.085197	0.000188537	0.0129119
F15E6.3	F32D8.12	-0.316508	0.0930871	0.000673539	0.0342714
F55G11.4	icl-1	-0.306006	0.0679123	6.6094e-06	0.000922052
ugt-14	skpo-3	-0.299911	0.0874357	0.000603423	0.0317148
Y22D7AR.10	cpr-1	-0.291923	0.073534	7.19023e-05	0.00624997
D2024.1	F57F5.1	-0.286739	0.0650977	1.05904e-05	0.00135991
Y6E2A.4	C33F10.1	-0.282767	0.0832511	0.000682395	0.0342714
ZK1320.3	vha-17	-0.260597	0.0795857	0.00105878	0.0459827
F52H3.5	mup-4	-0.259688	0.0731891	0.000387916	0.0222337
hpo-6	ifb-2	-0.223091	0.0680726	0.00104822	0.0457332
Y38H6C.19	hphd-1	-0.200988	0.0618215	0.00114959	0.0481124
F13G11.3
npa-1
col-98
nlp-9
gst-13
col-85
C41G11.1
nas-20
cyp-34A2
klp-15
btb-16
dhs-2
Y39G10AR.7
Y32F6A.5
F53C3.7
K06G5.1
Y105C5B.9
swah-1
M02D8.5
col-81
C14B1.7
gsy-1
T15B7.1
ttr-37
F48D6.4
gfat-2
clc-1
F59C6.16
mppa-1
fshr-1
F43G6.3
klp-16
fbf-2
skpo-1
nlp-18
C24B9.3
tofu-7
F15A4.6
F59A6.12
Y111B2A.21
Y25C1A.14
C49G7.7
Y43F8B.2
egg-5
chs-1
egg-4
T22F3.3
F35C11.5
C01G8.1
cpg-3
Y62E10A.14
kca-1
duo-1
K11D12.13
egg-3
T24C4.2
F35A5.2
M01E11.3
him-6
M04B2.4
T04A8.7
perm-1
F23F12.12
C04E6.11
T03E6.8
cpg-4
gyg-2
Y18H1A.11
R160.3
cyp-35A2
cyp-31A5
K11H3.4
cpg-1
ins-27
Y54G2A.36
egg-1
tdc-1
F19C7.1
T09B4.2
him-14
pgl-3
cosa-1
W05H9.1
M04F3.6
M28.10
cey-2
puf-11
fbf-1
acdh-13
lab-1
H05L14.2
Y105C5B.5
atad-3
F54D5.2
gln-5
msh-5
hmit-1.2
syp-4
Y54E5B.2
W03F11.1
best-3
smz-1
ego-1
R07B7.2
dhs-20
F36H12.2
car-1
nos-1
T01C3.3
Y37E11B.7
Y48G1C.13
LLC1.2
egg-2
C06A1.4
T22D1.5
ZC317.1
wdr-5.3
rme-2
puf-3
Y45G5AM.2
mut-14
Y71A12B.19
klp-10
coh-4
flp-18
C46A5.5
puf-5
C27D9.1
Y52E8A.2
vars-1
mei-2
F56F10.1
chk-2
C36A4.4
K06B9.2
K07C11.7
T12C9.7
T08D2.7
wago-2
Y39A3CL.4
D1081.7
ptr-22
F55G1.5
ZK1320.2
csr-1
C55C3.3
Y8A9A.2
Y62H9A.4
wago-4
rga-3
Y53C12A.11
H02I12.5
T07G12.5
snt-2
tbh-1
lea-1
Y38F1A.6
H34I24.2
ZK616.5
F42A6.3
cey-3
phat-6
clu-1
M01F1.8
T20D3.2
sdha-2
C38D4.4
piga-1
best-15
K11H3.8
gla-3
Y41D4B.17
aman-3
K08E3.5
skpt-1
T05F1.2
C14C11.2
glh-4
Y66D12A.16
clec-63
wago-1
xnd-1
T21B4.21
T24D1.3
egg-6
gei-14
ani-2
mut-2
C31H1.8
Y4C6B.2
szy-4
kat-1
H31G24.3
cbd-1
D1054.10
C32F10.8
F33E11.2
Y54E10A.12
plk-3
vps-33.2
W02D7.11
hrde-1
E02H4.6
B0238.9
sucg-1
CC8.2
hpo-40
ZC395.5
Y43E12A.3
cpg-2
pmp-5
F21F3.4
T24C4.5
F56D2.2
tag-63
wht-7
cyp-25A2
prom-1
rad-54
cgh-1
C23G10.7
F25D7.4
twk-5
K08F4.3
cec-9
W10C8.5
tkt-1
C24F3.2
C36A4.5
F59A3.2
snpc-3.1
K01C8.7
pms-2
F14D2.2
madf-8
C06A5.8
perm-2
Y39B6A.16
plk-2
col-118
mrpl-16
dgtr-1
T01C3.9
K08H2.10
K06A5.1
cyp-31A2
cpar-1
mrp-4
tat-3
F32A11.5
Y17G7B.8
rskn-1
C16A11.5
R03D7.3
acs-13
cyp-31A3
tofu-3
ftn-1
C34H4.1
K06A4.7
D2023.8
F55A12.10
F34D10.8
42066
W05F2.3
F55G1.6
htp-1
T05A7.1
R05F9.11
F52B5.3
sqv-1
R05F9.6
puf-10
mpst-1
sqv-4
Y39E4B.5
C27A7.6
wago-5
rpl-7A
Y110A7A.15
nhr-86
polq-1
sip-1
F52H3.4
him-3
fbxa-212
stdh-1
F56C9.11
C16C10.1
retr-1
R03G8.6
Y51F10.2
C09H10.10
F54D5.9
Y18D10A.11
R10H10.7
bcs-1
T07C4.3
rrf-3
spsb-2
B0304.2
Y54G9A.7
lin-41
rpoa-2
C16A3.2
gfat-1
pssy-2
F54E12.2
Y17G9B.9
him-19
such-1
pges-2
C13B4.1
C41G7.3
Y17G7B.12
Y32B12B.2
C01B10.6
F25H8.1
cyb-2.2
C48B4.11
mop-25.3
puf-7
pgl-1
hpo-9
C14B1.2
Y53F4B.4
puf-6
C49H3.6
gyg-3
daz-1
nnt-1
ZK1236.1
trcs-1
mrpl-11
C53A3.2
W06B4.1
W02D9.4
dna-2
R05H5.4
F21A3.11
B0207.6
Y111B2A.1
Y37B11A.2
snet-1
ZC477.3
linc-81
spg-7
mrps-30
gln-6
zyg-11
F55A11.7
C29A12.1
cyn-1
oma-2
mppb-1
ech-5
klc-1
F23H11.2
cdr-2
D1054.11
lbp-9
ZK809.5
cyb-2.1
K07H8.9
tofu-4
let-99
Y54F10AM.11
ugt-12
clec-62
ZK813.7
vha-18
klp-18
zwl-1
Y53F4B.9
42248
ZC373.2
D2023.6
K12D12.5
C30F12.4
C47D12.2
ipla-1
coq-5
Y53C12B.1
grl-10
umps-1
pgk-1
lact-6
R09F10.8
ndk-1
inx-22
acl-3
C39B5.6
mdh-1
sls-1.9
Y48G1A.2
Y110A7A.19
M116.5
gpd-1
tsn-1
vha-7
F53G12.9
gpd-4
R02F2.4
dph-2
F10B5.8
inx-21
har-2
spe-39
F46B6.6
glp-1
C47E12.3
Y73B3A.18
syp-2
puf-8
oma-1
B0001.2
T01B11.2
cyn-9
his-63
C14B1.12
ZK973.1
try-1
T05H10.1
R08D7.4
C28A5.6
F34D10.9
nduf-2.2
sqv-5
hmg-3
Y69H2.3
orc-1
cyn-7
C28A5.1
nhr-6
sls-1.8
Y41D4B.4
Y41D4A.6
C53A5.16
ZK813.3
ndx-7
ima-2
Y47A7.1
ppw-2
klp-7
tufm-2
his-45
wrn-1
D1046.3
tufm-1
btb-19
Y22D7AL.10
snpc-3.2
ctps-1
hcp-4
pzf-1
F13D12.5
hsp-6
CD4.8
tag-124
set-31
Y48B6A.13
F58G11.3
sqv-6
hpr-9
D2030.7
mrpl-45
C18D11.3
enol-1
pgl-2
F52E1.14
mrpl-51
his-55
mtss-1
Y37D8A.19
apc-10
acl-8
tbck-1
fars-2
C14B1.9
daf-18
btb-20
ocrl-1
dvc-1
pfkb-1.2
Y75B12B.1
mlcd-1
F56C9.7
C48B4.10
gss-1
gna-2
T23G4.3
phf-14
acl-6
W03G9.2
hpr-17
W02D9.6
spd-1
cpn-1
cogc-2
B0393.6
exo-3
ztf-1
cra-1
C50F4.16
ZK287.7
W03F8.3
hop-1
rnp-8
Y47G6A.25
F57C9.1
F55A11.4
pst-2
polk-1
F25G6.9
zbp-1
mars-1
K01D12.6
F34D10.4
F28B3.5
F56C9.6
Y57A10A.1
F32A7.4
mrpl-39
Y46E12BL.2
neg-1
hcp-3
zhit-3
M04F3.5
mom-2
Y54G2A.73
fem-1
perm-4
mrps-22
moc-3
vps-54
K09E4.3
ife-3
nkcc-1
cyp-34A8
Y54E10BR.2
D1044.6
Y18D10A.9
skr-17
F55A11.8
ZK858.7
Y43D4A.4
F18A1.7
tag-335
flp-22
C17G1.2
F22G12.4
hda-6
F33G12.3
F13H8.2
trpp-10
ufd-2
Y57A10A.31
hint-3
scrm-4
nol-10
cdc-7
Y82E9BR.19
cdkr-3
mspn-1
spe-44
W05F2.6
T13F2.6
T21C9.13
pup-2
mtx-1
dhhc-6
rund-1
mce-1
Y69A2AR.32
Y32B12B.4
vig-1
hpo-24
W01A11.1
Y45F10D.7
ivd-1
mrps-9
C14B9.8
lsl-1
F20C5.3
F18A11.6
flad-1
R07E5.1
Y73B3A.16
dsb-1
Y59A8B.21
wee-1.3
K07E8.7
Y108F1.1
Y57A10A.2
W02B12.10
C51E3.6
C08F8.3
vps-33.1
dro-1
T20B12.1
smg-8
C32D5.10
phb-2
ZK1010.2
ppgn-1
vars-2
tag-146
F19F10.11
ptr-2
ima-1
oxi-1
C08H9.16
BE0003N10.1
Y97E10AR.4
Y32H12A.7
abi-1
Y50D4C.5
haf-6
K09H11.7
T08D2.3
ZK546.2
gfm-1
klp-19
T14B4.1
elpc-2
ceh-92
F54C9.9
mrpl-17
ipgm-1
K11H12.9
htp-3
zip-11
C32D5.3
Y39G10AR.9
scav-2
set-14
F56C9.3
Y43D4A.3
ZK1320.9
mtcu-2
F26B1.2
F54D10.5
F35E12.6
F09F7.4
mrpl-12
dnj-18
ZK550.3
B0564.7
C33B4.4
aptf-3
fln-1
clk-2
mdh-2
F22E5.17
chk-1
F55G1.9
C50D2.9
pdp-1
C08H9.3
R04D3.3
chin-1
cpb-1
rpc-25
sqv-7
C06A8.3
eri-3
ZC376.3
cdc-48.2
cyp-43A1
rfc-2
knl-3
zim-3
C48B4.6
F28F8.9
set-24
F55C12.5
B0035.12
fan-1
set-21
farl-11
ztf-15
F12A10.8
C01G10.7
rft-2
Y51H7C.3
C17G10.1
F14B4.2
ZK20.4
C13G5.2
cab-1
M4.1
F52C6.2
his-66
sqv-2
R02F2.7
F25B5.5
lars-2
C46A5.6
ddo-3
F41G3.10
ZK829.7
let-754
wah-1
D1086.6
C28C12.12
F35G12.12
T27F7.4
R06B9.5
zim-1
nol-9
aco-2
C10H11.8
tag-232
C53B4.4
mogs-1
T28A8.4
zif-1
T09F3.5
T27A3.6
cdc-48.1
T08B2.11
cul-3
gras-1
Y57G11C.43
phb-1
C56G2.3
F30F8.1
sec-16
B0432.7
F07H5.10
C24H12.5
Y48A6B.10
pdhb-1
spn-4
C27F2.7
K04C2.2
rpom-1
nhr-66
apc-17
R74.8
erfa-3
lin-3
polh-1
T04A8.8
F54A3.6
T07E3.3
ubxn-1
nos-2
R06F6.8
xpo-3
msh-6
Y106G6D.7
mmaa-1
tag-179
F53F4.12
fbxc-45
mccc-1
npl-4.1
Y71G12B.10
nhr-274
ZC395.10
ZK1067.3
F08D12.3
ZK686.2
T10E9.2
rpl-1
R119.3
B0336.5
Y55B1AR.2
nra-2
F52A8.6
pme-1
W03C9.2
Y49F6B.9
ZC434.8
nmt-1
dog-1
tomm-40
gpdh-2
gtbp-1
C06G4.1
rpl-3
Y6D1A.1
hke-4.1
F56A11.5
F28B3.10
kup-1
ccnk-1
gdh-1
npl-4.2
mig-5
dnj-9
D2005.4
F40F8.5
T12G3.7
ced-3
R08E3.1
rog-1
hmg-12
tdpt-1
cyp-25A1
dnj-17
pdhk-2
sec-31
F48C1.6
kars-1
C35E7.8
B0024.10
rnf-1
tbce-1
C55A6.1
Y67D2.4
gon-14
Y71F9AL.8
pme-6
R01B10.6
C53A5.17
bir-2
K02C4.3
dpf-5
msh-2
cep-1
csn-5
C14C10.4
spr-1
spd-2
cye-1
F44E7.9
D2030.2
T23H2.3
pak-2
aho-3
B0261.7
F02E8.4
tgt-1
gly-7
Y111B2A.9
bcmo-2
sars-2
nstp-2
F56D1.1
exos-2
deps-1
gcst-1
C39E9.12
Y54H5A.1
nud-1
rab-6.1
F44B9.8
alh-9
T05G5.9
Y52B11A.3
C53A5.6
F42A8.3
B0511.13
C06A5.3
wht-2
Y106G6H.14
ehs-1
nars-1
R31.2
lip-1
aakg-5
mes-6
mrpl-28
T08G11.1
apn-1
C01B10.8
T26A5.4
cyk-7
age-1
Y43F11A.6
glh-1
tbcd-1
dnj-10
F17C11.7
mett-10
acl-11
C28A5.2
F56D1.2
Y54E2A.8
gly-20
tre-1
usp-46
xpf-1
gex-3
C17H12.2
C17G10.2
F13E9.1
kin-4
T11G6.5
parn-1
F26E4.4
D2096.11
Y39A1A.22
F21D5.1
rtel-1
F44E7.2
M01H9.3
pyc-1
Y50D4C.6
B0524.6
W02B12.11
pas-2
srf-3
asfl-1
metr-1
acly-2
tofu-6
tars-1
R10E4.11
ctns-1
mtm-9
swp-1
mex-5
zim-2
vps-51
kdin-1
C24D10.6
ric-7
uba-5
tbc-3
ndx-9
orc-4
sax-2
spas-1
fars-1
nxf-2
mrpl-38
T06D8.9
tofu-1
mdt-6
R06F6.12
T24H10.1
W08E12.7
Y105E8A.8
ani-3
AC8.9
C16A3.1
exos-8
snpc-1.2
nol-6
mrps-31
C42C1.8
ZK813.1
W09C5.7
C05C10.3
C25H3.4
rpl-11.1
chl-1
asb-1
C30G12.2
osta-3
D1069.3
mex-6
F31C3.4
obr-4
K09H9.2
ech-4
pie-1
C34C12.8
gld-3
copa-1
rec-8
F35D11.4
F35G12.5
K07A12.4
mafr-1
T10F2.2
C45G9.2
H14A12.3
sand-1
F44E7.5
scpl-1
C47G2.4
nos-3
E01A2.1
F09E5.3
ing-3
exo-1
F29G9.2
vps-15
F41G3.6
cdk-2
R07G3.7
hpo-35
H21P03.2
T04A8.6
ppm-1
R12E2.2
fbxa-215
lin-23
cit-1.1
cdt-2
T25G3.4
sec-61
skih-2
B0336.7
Y39A1A.14
hyls-1
lin-45
F52B5.2
F53H1.3
gpcp-2
ran-3
R144.10
ppw-1
dld-1
M01F1.9
hsp-70
ptc-2
cdk-8
B0024.11
exoc-7
sumv-1
larp-1
atg-3
hmg-20
F40F8.11
coq-8
D2030.3
syx-4
sec-10
F33H2.2
F17A9.2
sec-23
T20G5.9
agl-1
qns-1
brc-1
agt-1
B0432.8
Y57G11C.3
F01G4.4
nars-2
elpc-1
ZK973.11
Y71H2AM.2
dhps-1
C50E3.5
C47G2.7
unc-132
hyl-1
zyg-1
pri-1
hcp-1
D2096.12
eat-6
F26A1.14
brap-2
Y110A7A.9
C50E3.13
C14A4.3
Y73E7A.2
spat-1
emb-27
gly-10
F11A3.2
dhod-1
mmcm-1
his-74
mdf-1
secs-1
rbd-1
F08D12.1
F55F8.3
mpk-1
F20H11.1
C37A5.7
F44E7.4
orc-5
arrd-13
T28A8.6
C37C3.9
prx-10
wip-1
him-18
R151.7
vps-35
Y73B6BL.23
wrm-1
C44B7.12
ucp-4
disl-2
ubl-1
cri-3
syx-16
rde-1
aakg-4
nlp-14
B0280.9
ZK795.3
cas-2
btf-1
math-43
let-716
clh-5
pif-1
F52C12.1
F11A10.5
F44E2.8
F58G1.2
apc-2
dhhc-7
mcu-1
Y111B2A.3
coh-3
par-2
ZK546.14
F26F2.7
pkc-1
Y37E11B.3
hmgr-1
iars-2
H22K11.2
atx-3
ZC376.6
B0432.6
R02D3.7
ptc-1
ntp-1
T14G10.5
ZC434.4
F13G3.6
drap-1
ced-5
brc-2
rga-1
rad-51
F43G9.3
F26A1.1
pal-1
cdc-25.1
rpb-3
ZK370.4
rbg-3
C48B4.7
prp-4
pptr-2
ech-2
apx-1
dsb-2
M01F1.4
R08D7.2
Y50D4A.1
F59A6.5
cpb-3
scc-3
patr-1
dhs-11
B0513.4
rict-1
W04D2.4
C02B10.5
F13B12.6
T23B12.6
csc-1
tbc-9
got-2.1
unc-85
Y67D8A.2
Y75B8A.14
T12G3.4
mrpl-4
npp-23
W03F9.1
Y65A5A.2
ubxn-2
Y51H7C.7
xpg-1
Y71F9B.2
F33H2.5
H25P19.1
Y39A3CL.1
mans-4
Y75B8A.24
Y50D4A.4
Y54G9A.5
K02F3.12
toca-2
Y23H5A.3
mat-1
spd-5
rpc-2
eri-1
hpo-12
Y53F4B.18
T21B10.3
unc-59
T26A5.2
fkb-2
flap-1
H27A22.1
F17C11.10
rabn-5
F48A11.4
unc-71
vps-36
sygl-1
F54D5.3
xpc-1
F55D12.5
ZK370.8
nasp-1
smg-9
Y73F8A.27
him-1
tbb-1
sago-2
let-49
air-2
H25P06.1
mop-25.2
plst-1
lap-2
R05G6.4
aka-1
rbr-2
his-68
K07F5.14
H20J04.4
smc-6
C14C11.7
Y37E11B.5
ifet-1
sas-5
T27F6.6
H34C03.2
unc-11
C42C1.4
pbs-6
Y119D3B.14
evl-18
app-1
cogc-6
adsl-1
cul-2
nth-1
dnj-28
C30G12.6
ptp-2
sar-1
F57B9.1
mdt-4
pas-6
slx-1
Y41E3.7
snpc-1.1
par-3
C05D11.9
cash-1
aak-1
mrps-14
mrps-18B
prde-1
sti-1
rbbp-5
eea-1
crn-5
C25A1.5
ddl-3
srgp-1
skat-1
inft-2
F31C3.2
mig-22
cup-2
hip-1
rpn-12
F38A5.2
rab-33
dkf-2
catp-6
nath-10
imp-1
ZK430.5
lat-1
sel-10
F48E3.4
trm-1
spl-1
perm-3
morc-1
set-4
num-1
adbp-1
mei-1
cyk-4
rlbp-1
rde-4
rpoa-1
tag-65
ufl-1
syx-5
B0361.3
syx-18
F35G2.1
C01F1.6
T09F3.2
fncm-1
F33H1.3
mnk-1
usp-48
atm-1
wdr-48
hpo-27
mex-1
T02G5.7
B0432.13
T26A8.4
C47G2.3
lin-5
mboa-2
pas-7
T27A3.7
Y54G11A.3
C56E6.9
acs-4
sel-11
C32E8.5
itsn-1
ced-6
M01A10.1
upp-1
mbtr-1
nspc-9
tbc-20
T26A8.1
prmt-5
inx-14
dom-3
C34C12.2
hpo-5
cox-15
Y54E5A.6
nfx-1
lst-4
fkb-6
cyn-3
dab-1
C12D8.1
C08F8.2
smgl-1
szy-20
nrde-1
viln-1
ztf-8
lid-1
R01H10.7
rfl-1
pcaf-1
jmjd-5
R05D3.2
nstp-10
Y67D2.2
cchl-1
ufd-1
B0205.6
T24D1.2
ZC477.5
K01G5.9
grld-1
Y43F8C.6
ile-1
cht-3
fzo-1
cct-6
T19B4.5
brf-1
Y48A6C.4
ehbp-1
lin-54
sptl-1
pot-2
mon-2
B0361.8
fut-3
madf-11
C27B7.5
W09D6.1
pyk-1
ran-5
jhdm-1
F23H11.4
fntb-1
fem-2
F22F7.1
mat-2
R11H6.2
wdr-20
pitr-1
nop-1
F11A10.6
mecr-1
T05H4.10
T28D9.4
reps-1
gck-1
Y66D12A.6
sec-24.1
ufbp-1
hpo-31
lin-37
mut-7
tut-1
sec-12
pch-2
dbn-1
eif-3.H
ruvb-2
gtl-1
W03F9.2
gmps-1
F55A12.5
rpl-20
sac-1
tra-1
Y56A3A.31
hpo-32
pxf-1
stim-1
bath-44
F32E10.5
Y87G2A.13
T25D3.4
nprl-3
ucr-2.3
mrck-1
taf-2
acl-9
C18H9.3
snx-13
hpo-19
dct-16
C34B7.2
dpf-7
F25H5.5
Y102A5C.6
exoc-8
3R5.2
hda-2
mage-1
brd-1
T19A5.1
ZK632.5
gld-2
mes-2
D1007.5
plc-4
tag-184
K02F6.7
snx-14
taf-6.2
rsks-1
F25H2.6
slr-2
dhs-22
sas-4
smg-2
alh-6
clh-3
pro-1
fic-1
scc-1
gld-4
csnk-1
Y23H5B.6
Y17G7B.13
C16A11.2
elpc-4
ZK1248.13
gpr-2
Y48A5A.1
C14C10.5
ears-1
hrdl-1
Y110A2AR.1
Y54G11A.1
magu-1
F46C5.9
F54D5.12
F33H1.4
ZK669.4
ztf-18
Y48C3A.20
vacl-14
Y106G6H.6
odr-8
Y48G8AL.10
F45F2.11
wdr-46
npp-15
K03B4.1
F49E8.7
Y42H9B.3
ufd-3
B0001.8
unc-101
knl-2
apr-1
arp-6
htp-2
Y92H12BR.7
ifg-1
K07H8.2
hsp-4
glrx-3
mrp-7
cku-80
duo-3
ZK177.8
athp-1
tpp-2
hil-5
nsf-1
rskd-1
san-1
rpn-8
F07F6.4
C30B5.2
Y71F9AL.1
inf-1
C07H6.4
gap-3
tag-51
C09H10.5
rars-2
copb-2
tag-345
zyg-8
larp-5
mtrr-1
com-1
T10C6.6
dis-3
aspm-1
mrps-18C
vps-18
ZK632.11
T22F3.2
him-10
gcn-2
C37H5.5
rab-35
Y54G11A.2
gpr-1
Y55F3BL.2
uri-1
rpt-3
F27B3.7
sun-1
sams-3
cgt-3
F16A11.1
ztf-23
Y24F12A.1
sco-1
cin-4
VF13D12L.3
B0513.7
C01G5.6
F58B3.7
C05C10.5
lin-7
crls-1
ril-2
Y47G6A.9
ZK1307.9
emb-8
acdh-12
Y60A3A.8
rpt-5
cec-6
Y53F4B.21
dhs-24
B0393.3
set-5
Y50D4C.3
air-1
T04H1.2
ppfr-4
C34C6.4
C44B7.5
mdt-27
rpl-26
T13C2.6
lin-9
K05C4.5
T23B12.4
T26C5.3
drp-1
pnc-1
rpl-31
F48E8.2
tag-153
Y56A3A.16
pqn-20
T24H10.4
R148.3
cka-1
rod-1
gcn-1
F26F4.5
hda-1
F46F11.1
Y47D3A.14
emc-5
M18.3
C09D4.4
ndc-80
Y48B6A.1
spr-2
ect-2
T20B12.3
pisy-1
lin-36
ruvb-1
lin-49
unc-57
cks-1
Y45G5AM.9
C33A12.3
F56G4.6
atfs-1
rfc-4
gen-1
eri-9
M01B12.4
alfa-1
mut-15
ZK1067.2
xpb-1
Y18H1A.7
iffb-1
rpt-4
dcaf-1
symk-1
unc-61
W09D10.1
H14E04.2
mdt-28
rab-7
clh-6
E02H9.3
cfim-1
ZK632.4
T06E6.1
parn-2
Y54E2A.4
Y54G2A.17
T23B3.1
F09E8.2
mel-28
stl-1
fars-3
Y34D9A.3
F54D5.7
angl-1
odr-4
Y43F4B.5
mdt-8
ebp-2
mct-5
B0019.2
ced-9
B0035.6
M106.3
alh-1
R151.8
bre-3
Y47G6A.18
F08F3.6
C56G2.7
ceh-91
Y97E10AL.2
C17C3.1
Y48C3A.18
C36C9.1
atp-2
gly-9
rha-2
Y6B3B.4
fre-1
gon-4
hil-4
wapl-1
C04G6.4
eat-3
C35D10.7
samp-1
Y35H6.3
mdt-29
Y56A3A.2
zyg-9
T05E7.3
etr-1
pkc-3
acs-19
dbr-1
fcd-2
tiar-1
H35B03.2
ercc-1
tag-340
sdhb-1
hda-10
C06A6.4
tftc-3
F58B3.4
R04F11.3
Y54F10AL.1
F55F8.2
inx-7
coq-6
kin-18
R11H6.5
tac-1
Y38C1AA.1
ekl-6
eif-3.C
cyld-1
dhs-1
dcs-1
pph-4.2
Y50D7A.8
mdt-30
Y14H12B.1
mtch-1
Y76B12C.6
F14H3.6
mec-15
npp-18
mel-32
mcrs-1
Y46G5A.18
Y4C6B.1
rsa-1
W02D3.4
Y40B1B.8
aipl-1
C27A12.2
trr-1
sydn-1
F55F8.9
F58B3.6
bath-40
Y38C9A.1
R11A8.7
wsp-1
R12E2.1
F26A1.13
T24B8.7
sinh-1
lig-1
C01B10.9
F26H9.2
F30A10.3
C44B7.2
ZK688.5
scp-1
R12E2.11
Y24D9A.8
seld-1
dagl-2
strd-1
pdr-1
F37A4.1
F59H5.1
C34H4.5
dcr-1
Y92H12BL.5
Y54E10BR.3
cdc-6
ucr-1
Y60A3A.19
mms-19
thoc-3
F36A2.9
figl-1
B0495.5
tftc-1
T22H9.1
gly-3
F10C2.4
hmp-2
Y37H2A.1
E04A4.5
cul-4
Y66D12A.19
D1037.1
C05D2.10
D2030.8
rpc-1
rpn-9
ulp-1
Y55F3AM.9
yars-1
czw-1
glh-3
K12H4.3
cars-1
tpxl-1
btbd-10
F28C1.1
C27F2.8
F23B12.7
cdk-7
T12E12.3
set-3
miro-1
Y47D9A.1
prmt-3
acl-14
npp-7
rin-1
Y23H5B.5
C32D5.11
Y42H9AR.4
Y73B3A.1
raga-1
cil-1
copd-1
ksr-2
mcm-6
pas-1
ula-1
Y75B8A.13
hpo-29
dnj-25
B0001.7
eif-3.D
K07C5.6
ddx-19
uda-1
madf-3
efa-6
cdc-37
letm-1
K02F3.2
F33A8.4
met-1
npp-22
maco-1
K11H3.3
Y69A2AR.1
pcf-11
lst-6
ogdh-1
spat-2
Y62E10A.13
dsh-2
ZK524.4
micu-1
nhl-2
gcs-1
C44B9.3
pis-1
B0495.2
tag-353
unc-26
arf-6
unc-94
[truncated: 252 more rows]

## Sheet: 4
gene	log2FoldChange	lfcSE	pvalue	padj
dod-22	2.26744	0.319244	1.22489e-12	7.28489e-10
dod-3	1.88668	0.519355	0.000280435	0.0176051
C32H11.4	1.76931	0.187137	3.24189e-21	5.23333e-18
nspc-5	1.72314	0.428767	5.84908e-05	0.00541759
fat-7	1.33232	0.105081	7.73578e-37	8.74144e-33
K08D8.5	1.3256	0.278938	2.01107e-06	0.000378751
dod-24	1.21158	0.112339	4.04888e-27	7.62538e-24
clec-3	1.16129	0.350022	0.000907409	0.041513
F17C11.11	1.1002	0.144945	3.18657e-14	2.76987e-11
F41C3.2	1.02684	0.194339	1.26574e-07	3.1784e-05
nspc-2	1.00295	0.239247	2.764e-05	0.00297459
nspc-6	1.00295	0.239247	2.764e-05	0.00297459
kin-15	0.969301	0.211371	4.52292e-06	0.000690663
cdr-7	0.959753	0.20057	1.7088e-06	0.000332921
gst-13	0.921611	0.129454	1.08564e-12	6.81538e-10
glb-1	0.888886	0.159316	2.41377e-08	6.99375e-06
srp-2	0.884756	0.145103	1.07799e-09	4.20045e-07
col-101	0.876919	0.116147	4.35091e-14	3.5118e-11
fat-5	0.858805	0.182353	2.48218e-06	0.000438259
F55G11.8	0.833777	0.231514	0.000316495	0.0190234
ugt-63	0.757656	0.16177	2.81972e-06	0.000468133
F21C10.10	0.725474	0.20784	0.000482046	0.026966
F31F7.1	0.682294	0.0999462	8.69413e-12	4.67827e-09
asp-14	0.672164	0.0822812	3.1066e-16	3.19132e-13
elb-1	0.668154	0.186899	0.00035029	0.0205685
F55G11.2	0.664503	0.190745	0.00049449	0.0273909
acl-12	0.649698	0.16265	6.48453e-05	0.00586201
msp-45	0.63039	0.121764	2.25333e-07	5.30472e-05
Y43C5A.3	0.63019	0.168167	0.000178674	0.0125405
Y43F8B.2	0.61802	0.117225	1.34886e-07	3.3135e-05
F42G4.5	0.614061	0.169609	0.000294079	0.0182383
dct-17	0.610942	0.175339	0.000493339	0.0273909
F31C3.14	0.607825	0.125766	1.34515e-06	0.000271432
rab-35	0.606751	0.142909	2.17905e-05	0.00246233
sam-10	0.601497	0.124887	1.46222e-06	0.000289878
C04H5.1	0.594591	0.133694	8.6921e-06	0.00115554
catp-3	0.563318	0.10485	7.75961e-08	2.03915e-05
C06B3.6	0.559411	0.154748	0.000300364	0.0183465
atic-1	0.544656	0.111327	9.96161e-07	0.000208456
F38B6.4	0.544369	0.120357	6.09797e-06	0.000883423
snx-3	0.540957	0.144584	0.000182938	0.0127605
rrn-3.1	0.534892	0.0923438	6.93886e-09	2.45028e-06
Y57G11C.1147	0.524966	0.112258	2.91912e-06	0.000471229
tub-2	0.520804	0.150024	0.000517628	0.0283941
Y69H2.3	0.518065	0.0820673	2.74229e-10	1.10671e-07
F01G4.4	0.513249	0.114372	7.20454e-06	0.000980859
C17H12.8	0.511447	0.117555	1.35696e-05	0.00168501
Y54G2A.11	0.511391	0.1243	3.88558e-05	0.00388558
T28B8.1	0.50907	0.112028	5.51581e-06	0.000820114
tfg-1	0.503926	0.0866724	6.09432e-09	2.22148e-06
col-143	0.498539	0.123299	5.26999e-05	0.00508982
C31C9.2	0.488908	0.142163	0.000583732	0.031114
dod-17	0.482082	0.147348	0.00106898	0.0459827
Y51A2D.18	0.469075	0.109703	1.90411e-05	0.00219556
tra-1	0.467809	0.139367	0.000788836	0.0375919
rsr-1	0.465867	0.102763	5.80404e-06	0.000851762
cysl-2	0.462277	0.102986	7.16456e-06	0.000980859
cpg-8	0.462047	0.139401	0.000918047	0.0418304
ule-1	0.459114	0.103458	9.09246e-06	0.00119471
hil-4	0.45404	0.107474	2.3932e-05	0.00265129
daf-5	0.452745	0.115722	9.14014e-05	0.00748431
T22B7.7	0.452733	0.121094	0.000184981	0.0127805
mnk-1	0.442849	0.0945981	2.84965e-06	0.000468133
aqp-11	0.44221	0.0932975	2.13947e-06	0.000389936
F53H2.3	0.440787	0.122642	0.000325504	0.0193589
unc-71	0.438067	0.115132	0.000141851	0.0105455
swsn-1	0.432415	0.114685	0.000162952	0.0117284
lec-6	0.432369	0.114658	0.000162636	0.0117284
sip-1	0.430786	0.127425	0.00072302	0.0353685
Y51H1A.3	0.430601	0.11024	9.38236e-05	0.00748855
Y45G12B.2	0.428121	0.111964	0.000131436	0.00988927
cysl-3	0.418015	0.105894	7.89733e-05	0.00665969
acly-1	0.407524	0.104004	8.91526e-05	0.00735347
alg-2	0.406908	0.110109	0.000219452	0.0149386
athp-1	0.406789	0.101346	5.97279e-05	0.0054511
atp-4	0.406193	0.108081	0.000171126	0.0120858
abhd-3.2	0.402751	0.0932368	1.56274e-05	0.00185884
R08E5.3	0.400496	0.1045	0.00012684	0.00968437
F37C4.5	0.397113	0.0699494	1.36965e-08	4.55206e-06
Y39A1A.22	0.396724	0.118405	0.000806449	0.0381292
set-16	0.39633	0.114428	0.000533049	0.0290988
nhr-88	0.395054	0.116564	0.000701073	0.0348993
pph-4.2	0.39088	0.106674	0.000248063	0.0161917
rpl-4	0.387637	0.082107	2.3455e-06	0.000420701
T27D12.1	0.386712	0.108195	0.000351303	0.0205685
C07D8.6	0.381534	0.0766744	6.48995e-07	0.000143797
BE0003N10.1	0.374262	0.110111	0.000676477	0.0342714
fat-6	0.371606	0.0662415	2.02485e-08	6.02128e-06
maph-1.2	0.367499	0.089487	4.01293e-05	0.00397773
cdc-37	0.362187	0.0985232	0.000236771	0.0156463
ntl-3	0.361538	0.0945835	0.000132149	0.00988927
Y51H7C.1	0.359014	0.101065	0.00038188	0.0220166
hmr-1	0.357272	0.0927308	0.00011678	0.00903845
Y41D4B.4	0.357229	0.109442	0.00109811	0.0466491
pck-1	0.351748	0.0832587	2.39197e-05	0.00265129
acp-6	0.348392	0.0755135	3.95672e-06	0.000612478
F26H9.5	0.342954	0.0841208	4.56346e-05	0.00448409
dhs-13	0.33224	0.0941771	0.000419002	0.0236736
rpl-11.2	0.324456	0.0914723	0.000389582	0.0222337
Y51F10.2	0.323413	0.0921612	0.000449443	0.0252672
wwp-1	0.317532	0.0732066	1.44132e-05	0.00175128
rps-4	0.316128	0.0916127	0.000559129	0.0302304
nurf-1	0.312143	0.0847754	0.000231408	0.0154729
cul-3	0.312138	0.0937121	0.000865907	0.0403433
pcca-1	0.310352	0.0861361	0.000314513	0.0190053
C30E1.9	0.295359	0.0816378	0.000296978	0.0182383
mex-3	0.290755	0.0740497	8.61944e-05	0.00716174
rpl-2	0.289578	0.0791067	0.00025163	0.0162481
cpt-1	0.284251	0.0739339	0.00012072	0.00927985
cox-6A	0.279335	0.0822237	0.000680666	0.0342714
ldh-1	0.277561	0.0806834	0.000581445	0.031114
pccb-1	0.277455	0.0842008	0.000983648	0.0435891
asp-6	0.275846	0.0637723	1.52203e-05	0.00182968
K08D12.6	0.274556	0.0753281	0.000267596	0.0169879
ZK829.7	0.274353	0.0744479	0.000228548	0.0153726
rps-2	0.270844	0.0739414	0.000249324	0.0161917
C27A7.5	0.268242	0.081263	0.000963694	0.0432133
puf-11	0.262577	0.0786963	0.00084815	0.0399338
B0250.5	0.257044	0.0756598	0.000680389	0.0342714
pygl-1	0.252849	0.0758089	0.000851926	0.0399451
cpl-1	0.248307	0.062611	7.31282e-05	0.00630801
asb-2	0.245043	0.0752089	0.00112134	0.0471946
pqn-87	0.239736	0.0734181	0.00109327	0.0466188
puf-3	0.239082	0.0703736	0.000680484	0.0342714
attf-2	0.238942	0.0700942	0.000652328	0.0338133
rack-1	0.237959	0.056793	2.79032e-05	0.00297459
pod-1	0.237928	0.0729318	0.00110496	0.0467641
unc-54	0.230977	0.068246	0.00071314	0.0353054
cpg-2	0.2231	0.0606849	0.000236573	0.0156463
rpl-5	0.22014	0.065225	0.000737919	0.0356333
fat-2	0.217195	0.0600295	0.00029673	0.0182383
prmt-1	0.20738	0.0565342	0.000244239	0.0160459
act-5	0.206037	0.0598448	0.000575598	0.0309726

## Sheet: 5
gene	log2FoldChange	lfcSE	pvalue	padj
F33H12.7	-7.07316	1.26678	2.35645e-08	6.32253e-07
nhr-74	-4.49664	0.740731	1.27472e-09	3.97874e-08
C10C5.5	-4.10168	0.297892	3.91507e-43	8.27621e-41
F45D11.1	-4.05154	1.22695	0.000959539	0.00874658
B0244.4	-3.92294	1.26766	0.00197054	0.0157192
irg-1	-3.57216	0.520156	6.53524e-12	2.63525e-10
Y48E1B.8	-3.50528	0.33796	3.32907e-25	3.03577e-23
lon-1	-3.18392	0.174154	1.14711e-74	5.16275e-72
drd-10	-3.17621	0.488959	8.25573e-11	2.91605e-09
F49C12.10	-3.03543	0.736706	3.78426e-05	0.000548469
T20D4.3	-3.0088	0.894818	0.000772472	0.00735166
K12B6.11	-2.99282	0.619759	1.37209e-06	2.70006e-05
W08E12.8	-2.97769	0.888312	0.000802075	0.00759712
C25F9.11	-2.89671	0.745907	0.000102978	0.00130851
Y47D7A.6	-2.88721	0.306087	3.99929e-21	3.0325e-19
F57B1.1	-2.87941	1.02643	0.00502733	0.033353
Y49G5A.1	-2.76351	0.873114	0.00155019	0.0129047
C10C5.3	-2.70919	0.111748	7.69304e-130	8.25641e-127
cyp-29A3	-2.55083	0.610257	2.91604e-05	0.000431438
C47E12.9	-2.52771	0.927385	0.00641778	0.0402974
ugt-9	-2.45923	0.848782	0.00376317	0.0264103
ncx-6	-2.45126	0.439866	2.50759e-08	6.67671e-07
F54D8.10	-2.44282	0.338531	5.35648e-13	2.45028e-11
col-101	-2.4154	0.117555	8.18962e-94	5.71308e-91
D1022.3	-2.40657	0.506586	2.02853e-06	3.88231e-05
cyp-25A1	-2.36128	0.794071	0.00294288	0.0217474
C18A11.4	-2.34856	0.80664	0.00359666	0.0254983
Y82E9BL.18	-2.25261	0.690912	0.0011128	0.00984518
Y51B9A.6	-2.24284	0.688357	0.00112099	0.00989875
Y47D7A.7	-2.23876	0.630341	0.000382803	0.00409213
T20D4.5	-2.21961	0.526692	2.50616e-05	0.00037883
R08E5.1	-2.18145	0.223922	1.99532e-22	1.62799e-20
cyp-14A1	-2.16258	0.463288	3.04287e-06	5.638e-05
twk-16	-2.14006	0.67298	0.00147288	0.0123421
F01G10.9	-2.13665	0.322692	3.5598e-11	1.31392e-09
EEED8.15	-2.12608	0.63445	0.000805047	0.00762009
asp-17	-2.10344	0.387183	5.55141e-08	1.4006e-06
F19C7.4	-2.05502	0.772948	0.00784461	0.0471962
T13F3.6	-2.02295	0.0910913	2.88203e-109	2.68067e-106
T10B5.8	-2.01362	0.565097	0.00036619	0.00393409
sqrd-1	-1.9917	0.198629	1.15723e-23	9.96642e-22
F08G2.5	-1.98086	0.436028	5.54664e-06	9.60134e-05
F23D12.11	-1.94948	0.149235	5.34663e-39	9.44256e-37
F55G11.2	-1.93016	0.208343	1.96316e-20	1.45691e-18
F35F10.1	-1.92604	0.560353	0.000587764	0.00589115
Y94H6A.10	-1.84674	0.112404	1.17644e-60	4.3194e-58
ZK154.1	-1.82216	0.339738	8.16647e-08	2.0095e-06
clec-47	-1.8048	0.316615	1.19595e-08	3.32388e-07
Y71F9AM.9	-1.79233	0.453859	7.84521e-05	0.00102969
cdr-7	-1.79214	0.213367	4.49063e-17	2.67749e-15
grd-4	-1.78654	0.450656	7.36088e-05	0.000978085
comt-5	-1.77392	0.590755	0.00267502	0.0200656
col-110	-1.76076	0.354988	7.04733e-07	1.46099e-05
clec-3	-1.74859	0.365634	1.73246e-06	3.34782e-05
srp-2	-1.7466	0.154401	1.1434e-29	1.26609e-27
M153.2	-1.74601	0.301849	7.27825e-09	2.08943e-07
F33E2.4	-1.72597	0.5297	0.00112045	0.00989875
C34H4.1	-1.70099	0.235067	4.61503e-13	2.13367e-11
acdh-2	-1.67852	0.107546	6.47379e-55	2.05278e-52
asm-3	-1.66695	0.22419	1.04254e-13	5.10368e-12
dod-17	-1.66255	0.158921	1.29754e-25	1.2232e-23
his-40	-1.66076	0.373976	8.96226e-06	0.000148505
nlp-26	-1.64688	0.622701	0.00817536	0.0487031
his-38	-1.64675	0.296066	2.66579e-08	7.07094e-07
clec-70	-1.64497	0.611407	0.00713541	0.0435872
col-43	-1.59062	0.358897	9.33753e-06	0.00015381
F13E9.13	-1.58683	0.538097	0.00318835	0.023217
cysl-2	-1.57729	0.107529	1.02712e-48	2.70385e-46
mltn-10	-1.57505	0.350031	6.80344e-06	0.000116041
zipt-2.3	-1.54021	0.266507	7.50341e-09	2.14524e-07
F45D3.3	-1.53617	0.132511	4.48639e-31	5.17307e-29
dod-22	-1.52698	0.298872	3.23632e-07	7.09954e-06
R08E5.3	-1.51406	0.105766	1.76075e-46	4.38679e-44
col-143	-1.51358	0.12374	2.09691e-34	3.0161e-32
chil-19	-1.50938	0.459445	0.001019	0.00915456
clec-67	-1.5031	0.239833	3.67458e-10	1.2265e-08
gst-38	-1.50234	0.488718	0.00211183	0.0166842
T01G5.1	-1.50093	0.216341	3.9822e-12	1.66815e-10
fpn-1.2	-1.49533	0.342039	1.23225e-05	0.000199679
C18H7.11	-1.48861	0.389477	0.000132338	0.00163621
C08F11.1	-1.48146	0.42693	0.000520393	0.00529965
T24D3.2	-1.48067	0.447574	0.000938948	0.00861289
ZK512.7	-1.47224	0.105968	6.97064e-44	1.56862e-41
VB0395L.1	-1.45966	0.358571	4.68561e-05	0.000661676
R07E5.4	-1.45866	0.258337	1.63905e-08	4.49275e-07
kynu-1	-1.45681	0.0934623	8.89956e-55	2.75926e-52
acsd-1	-1.45414	0.325992	8.17089e-06	0.000136527
acp-6	-1.44287	0.0765948	3.7101e-79	1.91716e-76
Y41C4A.32	-1.43197	0.369837	0.000107995	0.0013648
K02E7.6	-1.43178	0.230611	5.34457e-10	1.74223e-08
B0280.2	-1.42747	0.541981	0.00844365	0.0498333
W10G11.3	-1.42527	0.165968	8.87845e-18	5.60507e-16
vit-3	-1.4224	0.0797239	3.3602e-71	1.37887e-68
T03F6.10	-1.41811	0.433895	0.00108188	0.00962654
C05D11.5	-1.405	0.257503	4.86325e-08	1.23795e-06
K08F8.15	-1.39992	0.486376	0.00399855	0.0277689
R193.2	-1.38668	0.151808	6.57321e-20	4.70305e-18
vit-4	-1.3775	0.0721449	2.86222e-81	1.53591e-78
Y50D4B.4	-1.36519	0.129107	3.92903e-26	3.72911e-24
spp-17	-1.35888	0.115242	4.31294e-32	5.37269e-30
Y69A2AR.25	-1.35461	0.348308	0.000100605	0.00127953
gcsh-1	-1.35347	0.187045	4.61847e-13	2.13367e-11
afmd-1	-1.35155	0.302487	7.89011e-06	0.000132692
ZC250.4	-1.34682	0.22538	2.28998e-09	6.87092e-08
Y69A2AR.12	-1.34457	0.354852	0.000151204	0.00184406
abhd-3.2	-1.34289	0.0969705	1.29987e-43	2.87869e-41
R10E8.3	-1.34102	0.41918	0.00137839	0.0117121
K10D3.6	-1.34031	0.222715	1.76542e-09	5.36625e-08
ugt-15	-1.3397	0.453582	0.0031409	0.0229674
B0205.13	-1.33323	0.297853	7.6013e-06	0.000128239
lgc-4	-1.31603	0.363631	0.000295575	0.00328072
cln-3.3	-1.30902	0.273589	1.71315e-06	3.32432e-05
E01G6.3	-1.29788	0.312061	3.19574e-05	0.000470326
DC2.5	-1.29414	0.260911	7.04658e-07	1.46099e-05
C26G2.2	-1.28732	0.181672	1.38087e-12	6.05844e-11
arf-1.1	-1.27943	0.348109	0.000237506	0.00273632
haly-1	-1.27244	0.0842157	1.40561e-51	3.92221e-49
ugt-16	-1.27231	0.342423	0.000202724	0.00237084
cyp-35C1	-1.27098	0.417496	0.00233238	0.0180685
F45D3.4	-1.26953	0.134348	3.40213e-21	2.5938e-19
M01G12.9	-1.26821	0.189465	2.17699e-11	8.1869e-10
C31H2.4	-1.26518	0.226243	2.2428e-08	6.02921e-07
R10D12.1	-1.26431	0.310783	4.73889e-05	0.000667848
Y22D7AL.11	-1.25748	0.262712	1.69694e-06	3.30204e-05
Y51H4A.7	-1.23894	0.127825	3.24478e-22	2.58693e-20
F13E9.15	-1.23687	0.455239	0.00658806	0.0411628
clec-1	-1.23305	0.100877	2.33444e-34	3.32348e-32
F58G6.9	-1.23104	0.184464	2.49592e-11	9.36103e-10
Y54G2A.41	-1.22777	0.460157	0.00762713	0.0462266
K01C8.1	-1.22158	0.0906315	2.09262e-41	4.05504e-39
ugt-4	-1.2004	0.188804	2.0449e-10	6.95866e-09
F59A7.5	-1.19612	0.388129	0.00205786	0.0163317
D1054.8	-1.18748	0.138269	8.83311e-18	5.6018e-16
fbxa-216	-1.18007	0.357375	0.000959791	0.00874658
spds-1	-1.17884	0.167274	1.82319e-12	7.89975e-11
C50D2.6	-1.16289	0.345113	0.000752806	0.00719394
ZC449.8	-1.16117	0.37381	0.00189443	0.0152875
kmo-1	-1.15123	0.19663	4.77554e-09	1.3852e-07
cyp-36A1	-1.14674	0.243378	2.45564e-06	4.62363e-05
T13C2.3	-1.14444	0.333125	0.000591522	0.00592456
nhr-210	-1.1431	0.371539	0.00209324	0.0165467
R04A9.9	-1.14155	0.303648	0.000170294	0.00203768
haao-1	-1.13613	0.123779	4.36333e-20	3.15426e-18
gstk-2	-1.11803	0.402894	0.00552033	0.0358022
nipi-4	-1.11485	0.363813	0.00218137	0.0170981
W02B3.4	-1.10626	0.316747	0.000478399	0.0049515
C44C10.3	-1.10062	0.287412	0.000128441	0.00159573
cln-3.1	-1.09743	0.245738	7.97456e-06	0.000133888
Y37H2A.14	-1.08338	0.353735	0.00219359	0.0171648
R13D7.2	-1.07773	0.236763	5.31575e-06	9.27375e-05
anmt-1	-1.07749	0.295368	0.000264342	0.00300434
ech-7	-1.07526	0.139201	1.12298e-14	5.93479e-13
col-8	-1.07343	0.189032	1.35845e-08	3.7531e-07
C01H6.8	-1.06826	0.296565	0.00031563	0.00347293
T05B11.1	-1.06813	0.201312	1.12142e-07	2.67911e-06
fbxc-42	-1.05754	0.389885	0.00667894	0.0415261
C52B11.5	-1.05519	0.149168	1.50667e-12	6.56908e-11
ugt-63	-1.05245	0.163724	1.2915e-10	4.46013e-09
acly-1	-1.04458	0.105423	3.82581e-23	3.23501e-21
C08E8.10	-1.03747	0.385563	0.00712833	0.0435821
R03E9.2	-1.02529	0.379544	0.00690571	0.042463
rhy-1	-1.02172	0.164536	5.30783e-10	1.7343e-08
asp-14	-1.01977	0.0828457	8.07597e-35	1.18606e-32
F42A8.1	-1.0166	0.102	2.13272e-23	1.81437e-21
nhr-114	-1.00848	0.0775865	1.25371e-38	2.15948e-36
ugt-45	-0.999069	0.221778	6.6432e-06	0.000113865
vglu-3	-0.998792	0.251067	6.94424e-05	0.000931596
fat-7	-0.997969	0.10227	1.70115e-22	1.39614e-20
R08F11.1	-0.997776	0.193057	2.36223e-07	5.34162e-06
C42D4.2	-0.969964	0.162326	2.29519e-09	6.87179e-08
pcp-4	-0.961391	0.163213	3.85215e-09	1.12673e-07
cyp-34A4	-0.956127	0.290199	0.000985182	0.00890118
pcbd-1	-0.955427	0.225201	2.20982e-05	0.000338064
tag-96	-0.953694	0.252263	0.000156482	0.0018945
F43C9.1	-0.945692	0.239131	7.66291e-05	0.00101069
gst-24	-0.94502	0.299221	0.0015871	0.013157
mtp-18	-0.939502	0.227318	3.58072e-05	0.000520941
ckb-2	-0.935973	0.205449	5.22026e-06	9.12694e-05
far-5	-0.929119	0.239573	0.000105223	0.0013346
T02G6.5	-0.922188	0.335496	0.00598263	0.0381314
elo-5	-0.922142	0.0825283	5.48812e-29	5.80077e-27
lap-1	-0.920346	0.074302	3.09042e-35	4.58697e-33
C02F5.14	-0.916486	0.313229	0.00343431	0.0245594
cyp-13A2	-0.913806	0.218199	2.81485e-05	0.000418686
col-153	-0.910276	0.192742	2.32652e-06	4.39831e-05
F26H9.5	-0.908736	0.0857191	2.9377e-26	2.80731e-24
C23H3.9	-0.902078	0.307886	0.00339059	0.0243216
fard-1	-0.899878	0.0876055	9.42872e-25	8.48706e-23
cyp-33C8	-0.898794	0.197004	5.05939e-06	8.89026e-05
vit-1	-0.896165	0.0683931	3.15852e-39	5.64969e-37
lact-1	-0.895063	0.220926	5.09082e-05	0.000710272
F41E6.15	-0.893089	0.210474	2.20336e-05	0.000337445
F56A8.9	-0.882438	0.328331	0.00719574	0.0438981
F58G6.7	-0.880884	0.149687	3.98432e-09	1.16053e-07
ugt-62	-0.875262	0.080953	3.02097e-27	3.01061e-25
upb-1	-0.869858	0.0721515	1.80333e-33	2.46668e-31
ugt-13	-0.868601	0.214161	4.99574e-05	0.000699834
scav-4	-0.860454	0.154506	2.56122e-08	6.80649e-07
F19B2.5	-0.860028	0.142345	1.52356e-09	4.68288e-08
C35C5.10	-0.854298	0.130972	6.90194e-11	2.46912e-09
C16E9.1	-0.852167	0.143078	2.5856e-09	7.69174e-08
poml-2	-0.843974	0.220823	0.000132403	0.00163621
T01C8.2	-0.8428	0.215294	9.05357e-05	0.00117067
C01F1.3	-0.841219	0.260171	0.00122354	0.0106096
C34C12.7	-0.838376	0.160965	1.90423e-07	4.3769e-06
F29C6.1	-0.834531	0.137896	1.4316e-09	4.44848e-08
elo-2	-0.829284	0.0741856	5.19565e-29	5.53357e-27
glp-4	-0.829267	0.0697186	1.26427e-32	1.66407e-30
C52D10.3	-0.824618	0.169271	1.10709e-06	2.21927e-05
ugt-21	-0.822612	0.23207	0.000393101	0.00417076
smd-1	-0.812544	0.0862862	4.64817e-21	3.50547e-19
acd-2	-0.812071	0.249042	0.00111104	0.00983584
sec-22	-0.811728	0.206569	8.50989e-05	0.00110652
dhs-25	-0.808296	0.120513	1.98466e-11	7.48377e-10
C44C10.11	-0.807339	0.260793	0.00196343	0.0156895
nit-1	-0.804667	0.195408	3.82358e-05	0.000552814
jmjc-1	-0.804584	0.236097	0.000654746	0.00642215
K08D8.5	-0.804522	0.263687	0.00228044	0.0177351
oatr-1	-0.803555	0.075004	8.79714e-27	8.6435e-25
ncx-7	-0.802937	0.167911	1.73624e-06	3.35048e-05
C01B4.6	-0.802331	0.280852	0.00427973	0.0292711
Y19D10A.16	-0.802331	0.280852	0.00427973	0.0292711
F07A11.5	-0.80058	0.143521	2.43098e-08	6.49752e-07
F40A3.2	-0.797971	0.132074	1.52381e-09	4.68288e-08
lgc-45	-0.795286	0.147968	7.66993e-08	1.89735e-06
M04C9.4	-0.794968	0.291521	0.00639199	0.0401536
dod-24	-0.786867	0.109256	5.93273e-13	2.6962e-11
pcyt-1	-0.785498	0.108746	5.07711e-13	2.33782e-11
ldp-1	-0.783755	0.0620746	1.51749e-36	2.46187e-34
K04C1.5	-0.782446	0.20499	0.000135087	0.00166496
hpd-1	-0.780813	0.0779184	1.23374e-23	1.05602e-21
C27C12.3	-0.780372	0.241935	0.00125736	0.0108355
nekl-2	-0.780203	0.219963	0.00038968	0.00414076
ugt-60	-0.774537	0.179452	1.58788e-05	0.000251465
acox-1.2	-0.773171	0.194701	7.15501e-05	0.00095528
Y39B6A.27	-0.772072	0.212425	0.000278458	0.00313563
B0222.5	-0.767553	0.150879	3.63374e-07	7.84797e-06
fkb-5	-0.765579	0.207557	0.000225562	0.00261166
fbxa-72	-0.763301	0.115204	3.45726e-11	1.28628e-09
pah-1	-0.762287	0.0890863	1.16117e-17	7.26484e-16
F22F7.8	-0.761998	0.221953	0.0005966	0.00596685
clec-139	-0.757248	0.284043	0.0076769	0.0464025
M04C9.3	-0.748867	0.271432	0.00579882	0.0371978
pdi-6	-0.747774	0.0934443	1.22058e-15	6.78469e-14
math-22	-0.744142	0.270868	0.00600981	0.0382347
fig-1	-0.743856	0.207432	0.000335772	0.0036542
ztf-26	-0.740507	0.228441	0.00118877	0.0103725
elo-6	-0.739436	0.0872381	2.32935e-17	1.4254e-15
T28C12.2	-0.738187	0.255242	0.00382666	0.026802
col-179	-0.732659	0.212291	0.000558077	0.00562954
ugt-41	-0.728264	0.145154	5.24358e-07	1.10846e-05
T14G8.3	-0.727849	0.10021	3.77951e-13	1.76952e-11
F55D12.2	-0.727469	0.141902	2.95096e-07	6.5352e-06
Y47G6A.19	-0.725394	0.0913461	2.00301e-15	1.10024e-13
meg-4	-0.724521	0.212337	0.000644597	0.00636305
ugt-39	-0.723844	0.264434	0.00619397	0.0391387
pmt-2	-0.72174	0.0614616	7.67596e-32	9.47744e-30
T11G6.3	-0.720325	0.16709	1.62521e-05	0.000256503
ugt-61	-0.719538	0.191325	0.000169366	0.00203181
T09B4.8	-0.717782	0.097986	2.38265e-13	1.13845e-11
F36G9.3	-0.717631	0.256808	0.00519921	0.0342328
D2045.9	-0.71746	0.219898	0.00110355	0.00978193
dhp-1	-0.713892	0.147463	1.29072e-06	2.55073e-05
erv-46	-0.71386	0.157996	6.23618e-06	0.000107416
H06H21.8	-0.703813	0.0986123	9.52711e-13	4.24672e-11
acy-3	-0.701526	0.206977	0.000700499	0.00676826
ifd-2	-0.700706	0.162031	1.52868e-05	0.000242642
prmt-6	-0.699914	0.185142	0.000156563	0.0018945
W09G12.9	-0.698584	0.230704	0.00246133	0.0187971
col-119	-0.695251	0.220256	0.00159645	0.013211
C09B8.4	-0.694507	0.176521	8.33984e-05	0.00108847
C34C12.8	-0.692235	0.10175	1.02237e-11	4.04082e-10
pgp-9	-0.692012	0.132854	1.90042e-07	4.37535e-06
mct-3	-0.691341	0.0819557	3.29645e-17	1.99966e-15
tsp-10	-0.691177	0.241462	0.00420359	0.0288909
vap-1	-0.68995	0.234534	0.00326315	0.0236752
R06C1.4	-0.681301	0.0899822	3.68928e-14	1.9064e-12
set-19	-0.680708	0.25844	0.00844091	0.0498333
sams-1	-0.680396	0.0757573	2.67685e-19	1.83075e-17
sur-5	-0.680235	0.0825649	1.73955e-16	1.0029e-14
cbl-1	-0.679906	0.13647	6.29023e-07	1.31379e-05
C33G8.2	-0.675297	0.148181	5.18313e-06	9.0848e-05
mpc-2	-0.675166	0.111071	1.21168e-09	3.79895e-08
hprt-1	-0.674884	0.104287	9.7075e-11	3.40079e-09
R07E3.4	-0.673659	0.169819	7.28071e-05	0.000971133
ncx-1	-0.67096	0.0901345	9.76889e-14	4.79914e-12
tre-2	-0.667847	0.0885901	4.74952e-14	2.43622e-12
cyp-34A8	-0.667398	0.148364	6.84702e-06	0.000116533
F40F8.4	-0.666968	0.224136	0.00292293	0.0216114
scav-5	-0.660011	0.2051	0.00129092	0.0110836
tmem-135	-0.659327	0.221819	0.00295515	0.0218034
grd-13	-0.655204	0.168242	9.84373e-05	0.00126
ZK228.3	-0.65448	0.174261	0.000172827	0.00206445
set-27	-0.650948	0.164429	7.53147e-05	0.000997902
dnj-7	-0.647092	0.112283	8.26213e-09	2.34772e-07
Y11D7A.3	-0.646734	0.113115	1.08114e-08	3.02286e-07
Y71H2AM.11	-0.640637	0.092707	4.83489e-12	1.99575e-10
Y43F8C.13	-0.640033	0.119915	9.43051e-08	2.28032e-06
gcc-1	-0.638345	0.204788	0.00182638	0.0147977
rft-1	-0.638283	0.211407	0.00253429	0.019227
mrps-31	-0.63664	0.12483	3.39565e-07	7.37945e-06
sqv-6	-0.634499	0.190899	0.000888198	0.00823398
ugt-46	-0.632499	0.102883	7.85835e-10	2.52045e-08
Y75B8A.6	-0.632328	0.214498	0.00319897	0.0232822
C49A9.6	-0.631949	0.190303	0.000897755	0.00829171
C03B1.13	-0.628064	0.210228	0.00281235	0.0209604
R04D3.3	-0.627884	0.109208	8.95441e-09	2.53411e-07
Y73B3A.18	-0.623841	0.191762	0.00114108	0.010038
Y37D8A.3	-0.623072	0.156386	6.77099e-05	0.000910982
nduo-3	-0.619184	0.225849	0.00611434	0.0387057
C15A11.7	-0.618855	0.135957	5.31752e-06	9.27375e-05
Y66D12A.9	-0.616367	0.107518	9.88624e-09	2.77531e-07
R02F2.8	-0.616219	0.233416	0.00829038	0.0491574
F17A9.5	-0.613825	0.153013	6.03133e-05	0.000823377
slc-25A21	-0.61198	0.20227	0.00248172	0.0189003
act-5	-0.610266	0.0599807	2.58057e-24	2.26441e-22
che-10	-0.609424	0.174483	0.000478085	0.0049515
crt-1	-0.608708	0.0843236	5.24815e-13	2.40862e-11
tomm-7	-0.607055	0.178643	0.000678444	0.00659168
aqp-11	-0.604794	0.0934564	9.70947e-11	3.40079e-09
sfxn-2	-0.604395	0.197927	0.00226094	0.0176129
mppa-1	-0.603231	0.10357	5.73189e-09	1.64889e-07
F54E2.1	-0.601767	0.105899	1.32788e-08	3.67591e-07
clec-66	-0.601312	0.216449	0.00546823	0.035518
T01H8.2	-0.601306	0.20745	0.00374883	0.0263229
T03G11.6	-0.600075	0.192692	0.00184461	0.0149367
F20D6.5	-0.599137	0.185173	0.00121409	0.0105474
R10E8.7	-0.598783	0.21164	0.0046656	0.0313557
nhr-14	-0.595506	0.178772	0.000865074	0.00809896
slc-17.5	-0.589664	0.223209	0.00824779	0.0489465
let-268	-0.58887	0.14717	6.30014e-05	0.000855054
lam-3	-0.587684	0.189595	0.00193735	0.0155434
T25B9.9	-0.586763	0.0743303	2.92652e-15	1.60121e-13
fitm-2	-0.586653	0.116101	4.35008e-07	9.28016e-06
bas-1	-0.586461	0.126999	3.87779e-06	7.00815e-05
R09B5.11	-0.585557	0.192473	0.00234799	0.0181291
cysl-3	-0.583725	0.106011	3.66562e-08	9.50609e-07
tsfm-1	-0.583626	0.103162	1.53721e-08	4.23022e-07
Y106G6D.6	-0.582835	0.213217	0.00626593	0.039504
VF13D12L.3	-0.581744	0.121561	1.70476e-06	3.31265e-05
pnk-4	-0.577367	0.165111	0.000470818	0.00488754
T24C12.3	-0.574246	0.13815	3.22895e-05	0.000474214
T06D4.1	-0.573131	0.172108	0.000868259	0.0081084
F19H6.4	-0.572909	0.205094	0.0052158	0.0343097
vit-5	-0.571718	0.0788617	4.17929e-13	1.95015e-11
vglu-2	-0.571278	0.119425	1.72212e-06	3.33709e-05
F02H6.2	-0.569178	0.210276	0.00679322	0.0419742
glb-1	-0.567467	0.15664	0.000291478	0.00324298
rnh-2	-0.563509	0.132073	1.98433e-05	0.000307273
ckc-1	-0.563448	0.136736	3.77712e-05	0.000548371
ampd-1	-0.562444	0.0802895	2.46644e-12	1.05558e-10
C43E11.9	-0.559691	0.10193	3.99837e-08	1.02546e-06
B0491.7	-0.558851	0.145632	0.00012433	0.00154786
npr-5	-0.556841	0.204027	0.00634781	0.0399119
grd-3	-0.555294	0.10033	3.11761e-08	8.20696e-07
T05H10.4	-0.554188	0.196964	0.00489828	0.0326851
ZK742.3	-0.552167	0.197279	0.00512749	0.0338565
F52H2.6	-0.551536	0.137179	5.8061e-05	0.000795744
tin-9.1	-0.550128	0.207447	0.00800403	0.0480311
eif-3.J	-0.548761	0.101996	7.4386e-08	1.84668e-06
Y50D4C.5	-0.548232	0.140315	9.33946e-05	0.00120096
atad-3	-0.545758	0.0804995	1.20476e-11	4.69522e-10
spin-4	-0.544446	0.159498	0.000641333	0.00633702
B0410.3	-0.54123	0.138791	9.63561e-05	0.00123449
txdc-12.2	-0.539121	0.150404	0.000337748	0.00367284
gly-8	-0.538184	0.136152	7.72358e-05	0.00101564
col-122	-0.536352	0.120414	8.41872e-06	0.000139998
F58B4.5	-0.536244	0.125959	2.0691e-05	0.000319337
Y17G7B.21	-0.53607	0.119072	6.72969e-06	0.000114924
adsl-1	-0.53503	0.0967179	3.16852e-08	8.32528e-07
T10D4.6	-0.533367	0.193337	0.00580238	0.0372035
ZK822.4	-0.532613	0.12016	9.3131e-06	0.000153589
dhs-20	-0.532543	0.191183	0.00534436	0.0349085
Y39E4B.5	-0.532128	0.11577	4.29816e-06	7.68819e-05
T21F4.1	-0.531674	0.132764	6.21092e-05	0.000844589
alh-12	-0.530362	0.100993	1.5088e-07	3.51431e-06
Y18D10A.23	-0.530271	0.1423	0.000194209	0.00228465
F54D10.7	-0.529518	0.19744	0.00732012	0.0445789
C29F7.3	-0.528157	0.0922039	1.01536e-08	2.84463e-07
C46C2.2	-0.527639	0.103329	3.28402e-07	7.18162e-06
R03D7.2	-0.526844	0.180688	0.0035482	0.0252424
hsp-3	-0.524563	0.0592846	8.8926e-19	5.85234e-17
cuc-1	-0.523636	0.140191	0.000187601	0.00222379
imb-3	-0.523494	0.0838261	4.23813e-10	1.40119e-08
C32D5.6	-0.523032	0.16249	0.00128702	0.0110638
unc-52	-0.522005	0.0791464	4.24023e-11	1.54464e-09
C06H5.6	-0.519325	0.103715	5.52182e-07	1.162e-05
dpyd-1	-0.517915	0.0760475	9.7319e-12	3.86836e-10
rab-6.2	-0.516832	0.17603	0.00332425	0.0239442
pho-13	-0.516636	0.141253	0.000254669	0.00291003
gcst-1	-0.515335	0.0802903	1.37713e-10	4.74414e-09
dnpp-1	-0.513445	0.0745682	5.75532e-12	2.3479e-10
col-124	-0.513173	0.110788	3.62111e-06	6.5698e-05
col-178	-0.510238	0.117659	1.44719e-05	0.000232083
rpc-11	-0.509914	0.192731	0.00815149	0.0485816
hex-5	-0.509397	0.192463	0.00812749	0.04848
ZK643.2	-0.507688	0.188828	0.00717463	0.0437885
ife-2	-0.506848	0.181004	0.00510712	0.0337379
C32E8.9	-0.505595	0.178172	0.00454417	0.0307023
T28D6.7	-0.505014	0.164775	0.00217764	0.0170976
Y17G7B.20	-0.501737	0.0871673	8.61214e-09	2.44221e-07
his-41	-0.500444	0.142112	0.000429141	0.00448808
tag-266	-0.500327	0.150869	0.000912165	0.00839481
col-140	-0.499048	0.111059	7.00553e-06	0.000118984
K11D9.3	-0.499002	0.129136	0.000111475	0.00140623
ugt-12	-0.498487	0.128053	9.90866e-05	0.00126563
C06A6.4	-0.497035	0.0770615	1.1196e-10	3.89544e-09
nas-37	-0.495156	0.124029	6.54449e-05	0.000883063
col-20	-0.49456	0.104523	2.22785e-06	4.23473e-05
C03H12.1	-0.492172	0.155757	0.00157841	0.0130991
ebp-1	-0.491911	0.141678	0.000516518	0.00527173
nid-1	-0.488371	0.0933075	1.65884e-07	3.83181e-06
cdkr-3	-0.488117	0.115761	2.48021e-05	0.00037572
F32A5.8	-0.487943	0.148508	0.00101756	0.00915343
T12F5.2	-0.484563	0.159622	0.00239991	0.0184279
C06G3.5	-0.484138	0.0934482	2.20914e-07	5.0445e-06
K11G12.6	-0.482616	0.163112	0.00308843	0.0226193
apa-2	-0.478554	0.125098	0.000130538	0.00161746
hmit-1.3	-0.477886	0.137435	0.000506699	0.0051905
idh-1	-0.477689	0.0562983	2.15798e-17	1.33222e-15
hsp-60	-0.477232	0.0763219	4.02931e-10	1.33532e-08
erfa-1	-0.476723	0.0653218	2.91917e-13	1.38062e-11
C44C1.1	-0.47595	0.126586	0.000169985	0.00203748
pck-1	-0.475586	0.0832498	1.11161e-08	3.10184e-07
F13H10.8	-0.475349	0.125692	0.000155661	0.00189016
mnat-1	-0.474593	0.11207	2.2875e-05	0.0003488
mpc-1	-0.472218	0.142956	0.000955775	0.0087415
Y32F6A.4	-0.470638	0.128336	0.000245191	0.00281325
rpoa-2	-0.46921	0.085571	4.17505e-08	1.06685e-06
suox-1	-0.468973	0.169454	0.00564786	0.0364304
gldc-1	-0.468475	0.0741009	2.57985e-10	8.71527e-09
nap-1	-0.467397	0.0597556	5.20704e-15	2.80497e-13
acl-1	-0.466993	0.124959	0.000186095	0.00220783
B0250.5	-0.465635	0.0758284	8.21884e-10	2.62401e-08
manf-1	-0.464108	0.116118	6.41897e-05	0.000867805
gop-2	-0.463729	0.116401	6.77904e-05	0.000911187
Y66D12A.10	-0.459658	0.160978	0.00429819	0.0293101
pept-1	-0.459631	0.072332	2.09151e-10	7.08271e-09
ZK795.3	-0.459556	0.109615	2.75957e-05	0.00041213
Y71H2AR.1	-0.459368	0.111492	3.78566e-05	0.000548469
H43I07.3	-0.457746	0.117323	9.55634e-05	0.00122659
tdo-2	-0.457595	0.0956767	1.72939e-06	3.34653e-05
elo-3	-0.457138	0.0817233	2.22247e-08	5.99766e-07
dpy-31	-0.45693	0.151713	0.00259698	0.0195749
tomm-70	-0.456581	0.085198	8.36545e-08	2.04763e-06
wdr-12	-0.455968	0.0994019	4.49423e-06	8.01836e-05
C29H12.2	-0.455784	0.0910462	5.55518e-07	1.16726e-05
rbm-39	-0.455662	0.0932831	1.03576e-06	2.08527e-05
C29E4.12	-0.45485	0.166245	0.00621885	0.0392604
nra-4	-0.454202	0.0844867	7.61518e-08	1.88716e-06
coq-8	-0.454003	0.0969078	2.80101e-06	5.23857e-05
tag-261	-0.45024	0.155113	0.00370015	0.0260467
txl-1	-0.449161	0.086986	2.42241e-07	5.46886e-06
B0035.15	-0.448599	0.143404	0.00175875	0.0143666
pdi-2	-0.446098	0.0689364	9.7256e-11	3.40079e-09
ahcy-1	-0.442715	0.0524056	2.96725e-17	1.80782e-15
meg-1	-0.440064	0.111523	7.94865e-05	0.00104229
lron-3	-0.440045	0.121108	0.000279602	0.00314091
Y53G8AR.6	-0.440018	0.131785	0.00084111	0.00791846
puf-5	-0.439226	0.0782141	1.95779e-08	5.31422e-07
K07F5.14	-0.438457	0.104587	2.76191e-05	0.00041213
chp-1	-0.438417	0.101103	1.4489e-05	0.00023209
Y75B8A.7	-0.437823	0.126788	0.000553998	0.00559289
mrpl-30	-0.437617	0.132658	0.000970862	0.00882667
mrpl-24	-0.436318	0.111014	8.48407e-05	0.00110523
pcp-3	-0.436148	0.0853574	3.22716e-07	7.09061e-06
K02F3.9	-0.435629	0.137946	0.00158871	0.0131625
mrps-28	-0.435155	0.127619	0.000650141	0.00639237
mrpl-34	-0.434185	0.131273	0.000941317	0.00862894
F55F8.3	-0.432935	0.103485	2.8697e-05	0.000425484
mcrs-1	-0.431859	0.12103	0.00035945	0.00387262
mpst-1	-0.43157	0.111806	0.000113383	0.00142643
cyn-10	-0.431497	0.138082	0.00177842	0.0145018
cri-3	-0.431004	0.0806495	9.08352e-08	2.2079e-06
mrps-15	-0.430779	0.114707	0.000173023	0.00206503
pole-2	-0.430723	0.135809	0.00151637	0.012667
mrpl-17	-0.430357	0.121633	0.000402919	0.00426519
pph-4.2	-0.428889	0.106194	5.37442e-05	0.00074168
Y95D11A.1	-0.428432	0.152405	0.0049366	0.0328761
aco-1	-0.427711	0.0711473	1.83669e-09	5.57075e-08
dct-6	-0.426636	0.122146	0.000477913	0.0049515
uggt-1	-0.424175	0.102199	3.31794e-05	0.00048575
C13F10.7	-0.422285	0.121143	0.000490619	0.00505922
hsp-1	-0.421588	0.0608968	4.42198e-12	1.83618e-10
mrpl-39	-0.420519	0.117605	0.000349291	0.00377191
erd-2	-0.420438	0.11936	0.00042762	0.0044791
F32D8.14	-0.420016	0.129404	0.00117129	0.0102521
let-767	-0.419918	0.0691602	1.26584e-09	3.95987e-08
coq-5	-0.419187	0.129466	0.00120446	0.0104898
elo-1	-0.41865	0.080914	2.29126e-07	5.198e-06
T06E6.1	-0.418624	0.125992	0.000891782	0.00825623
T22B7.7	-0.41861	0.120066	0.000489387	0.00505025
BE0003N10.1	-0.418519	0.109632	0.000134814	0.00166306
F47B7.2	-0.418088	0.128642	0.00115401	0.010139
F53F1.2	-0.417818	0.109217	0.00013046	0.00161746
cct-3	-0.417313	0.0795436	1.55147e-07	3.60769e-06
F09B12.3	-0.417168	0.106658	9.18128e-05	0.00118499
mrpl-15	-0.416102	0.117268	0.000387707	0.00413061
ZK512.2	-0.416084	0.0895952	3.41655e-06	6.24741e-05
sam-10	-0.415716	0.12317	0.0007378	0.00708411
pfd-2	-0.415484	0.128037	0.00117441	0.0102729
mrps-27	-0.415047	0.0942949	1.07463e-05	0.000175565
F57B10.8	-0.414856	0.146888	0.00473839	0.0317531
pro-3	-0.414459	0.105676	8.78317e-05	0.00113676
art-1	-0.414303	0.0818338	4.13268e-07	8.857e-06
pfd-3	-0.413547	0.107526	0.000120057	0.00150633
abtm-1	-0.41334	0.150009	0.00586132	0.0374609
pam-1	-0.412351	0.0753884	4.50834e-08	1.14991e-06
K07H8.10	-0.411651	0.0761298	6.40082e-08	1.59757e-06
ras-2	-0.411137	0.13314	0.0020151	0.0160381
eif-2alpha	-0.411068	0.0879425	2.94982e-06	5.48014e-05
eif-2Bbeta	-0.41062	0.12616	0.00113492	0.0100091
tald-1	-0.409109	0.0723253	1.54475e-08	4.24259e-07
dpy-11	-0.409036	0.0879901	3.34097e-06	6.14141e-05
dnj-9	-0.408963	0.109185	0.000179977	0.0021407
coq-1	-0.408402	0.0998972	4.34688e-05	0.000620753
C35D10.5	-0.407824	0.14502	0.00492046	0.0327842
cisd-3.1	-0.406201	0.126938	0.00137425	0.0116912
ubc-12	-0.405757	0.127386	0.00144633	0.0121489
mct-5	-0.40328	0.110189	0.000252318	0.00288552
ZK686.2	-0.402993	0.104794	0.000120271	0.00150766
nep-22	-0.402951	0.0988317	4.55925e-05	0.000645138
H06I04.3	-0.402554	0.0780615	2.51095e-07	5.65958e-06
K08A2.1	-0.399729	0.120344	0.000895146	0.00828188
sars-1	-0.399612	0.0732447	4.8739e-08	1.23795e-06
sec-61	-0.399283	0.062693	1.90437e-10	6.5122e-09
mboa-6	-0.399206	0.0904644	1.02016e-05	0.000167057
cpd-1	-0.398737	0.144002	0.00562331	0.0363056
gly-6	-0.398385	0.105355	0.000155977	0.0018907
mrp-4	-0.398185	0.0892567	8.15304e-06	0.000136392
mrpl-41	-0.39696	0.115942	0.000617571	0.006137
pdi-3	-0.396504	0.0586445	1.36912e-11	5.3061e-10
tut-2	-0.396302	0.132029	0.00268548	0.0201332
F32D8.5	-0.396191	0.132234	0.00273435	0.0204555
C04E6.11	-0.395741	0.108053	0.000249803	0.0028638
pbs-7	-0.395599	0.081914	1.36915e-06	2.6982e-05
fce-2	-0.395329	0.150133	0.00845859	0.0498934
ttr-31	-0.395171	0.119651	0.000957635	0.00874658
rpb-8	-0.3941	0.129471	0.00233518	0.0180702
denn-4	-0.393659	0.132511	0.00297069	0.0219009
bath-30	-0.393449	0.13774	0.00428408	0.0292711
dnj-10	-0.393263	0.098388	6.41326e-05	0.000867805
pabp-2	-0.392536	0.0993485	7.77936e-05	0.00102201
taco-1	-0.392225	0.116102	0.000729447	0.00701395
col-96	-0.391547	0.145048	0.00694569	0.0426616
daf-41	-0.390784	0.108854	0.00033071	0.00361038
W07E11.1	-0.390774	0.0975086	6.13438e-05	0.000834994
gars-1	-0.390027	0.0787425	7.30069e-07	1.50903e-05
sucl-2	-0.389899	0.104761	0.000197798	0.00232138
pal-1	-0.38963	0.1116	0.000480685	0.00497147
mrpl-2	-0.389592	0.118118	0.0009726	0.00883445
yop-1	-0.389059	0.0729713	9.73166e-08	2.34907e-06
snx-1	-0.389029	0.116717	0.000858872	0.00805308
Y45G12B.3	-0.38789	0.123031	0.00161715	0.0133427
F31C3.14	-0.387128	0.125667	0.00206595	0.0163774
dbt-1	-0.38698	0.0850566	5.37291e-06	9.34699e-05
hpo-29	-0.386085	0.0989305	9.51686e-05	0.00122264
C27A7.6	-0.385817	0.128304	0.00263786	0.0198508
mrpl-45	-0.384769	0.124244	0.00195576	0.0156461
ZK1236.5	-0.384296	0.132187	0.0036466	0.0257448
F25G6.8	-0.383901	0.116174	0.000951383	0.00870977
dnj-12	-0.383763	0.1077	0.000366284	0.00393409
nxt-1	-0.383627	0.136297	0.00488308	0.0326131
kars-1	-0.383574	0.0821071	2.98815e-06	5.54398e-05
K08D12.6	-0.381421	0.0753237	4.11062e-07	8.83689e-06
cct-1	-0.381311	0.0634341	1.84225e-09	5.5755e-08
enpl-1	-0.380641	0.0679039	2.07553e-08	5.62288e-07
clu-1	-0.380564	0.0919924	3.52015e-05	0.000513199
ncbp-1	-0.380556	0.100871	0.000161483	0.00194342
R148.3	-0.380532	0.0877474	1.44654e-05	0.000232083
dhs-3	-0.380462	0.121324	0.00171313	0.0140432
fbp-1	-0.380153	0.0847352	7.24486e-06	0.000122522
alg-2	-0.380007	0.109396	0.000513363	0.00524336
gale-1	-0.379739	0.0939491	5.30056e-05	0.000734393
Y71G12B.13	-0.379232	0.138345	0.00612136	0.0387325
toc-1	-0.378301	0.102334	0.000218385	0.00253486
pph-5	-0.377162	0.0969415	9.99892e-05	0.00127285
bud-31	-0.376907	0.113437	0.000891749	0.00825623
sco-1	-0.376816	0.109952	0.000610058	0.00607811
atgp-2	-0.376705	0.107062	0.000433888	0.00453114
top-1	-0.375742	0.0841955	8.09196e-06	0.000135533
ddx-17	-0.375676	0.0655119	9.7821e-09	2.75717e-07
F10E9.4	-0.375243	0.110605	0.00069224	0.00670703
Y54E10BR.5	-0.374831	0.103794	0.00030465	0.00336752
dys-1	-0.374404	0.112997	0.000921703	0.0084769
acs-5	-0.373925	0.0754816	7.27568e-07	1.50609e-05
F07A11.4	-0.373487	0.117348	0.00145891	0.0122398
far-8	-0.373219	0.0989298	0.000161581	0.00194342
map-1	-0.37319	0.103631	0.000316839	0.003478
F48E8.4	-0.372916	0.12836	0.00366977	0.0258719
F45G2.8	-0.372467	0.130407	0.00428762	0.0292809
cpz-1	-0.372459	0.133225	0.00517856	0.0341184
nra-2	-0.372007	0.0788184	2.36085e-06	4.45115e-05
C35A5.8	-0.37172	0.093141	6.58119e-05	0.000887157
F13B9.1	-0.371029	0.1025	0.000294831	0.00327506
hsp-90	-0.370977	0.0565151	5.23105e-11	1.89568e-09
Y23H5B.5	-0.370225	0.0909738	4.70973e-05	0.00066441
gspd-1	-0.369962	0.0915711	5.34146e-05	0.000737862
pcp-2	-0.369937	0.107012	0.000546306	0.00553929
Y69A2AR.16	-0.369343	0.101927	0.00029054	0.00323513
npl-4.2	-0.369112	0.0935674	7.98415e-05	0.00104596
mrps-9	-0.368753	0.10849	0.000676417	0.00657657
prpf-4	-0.366111	0.0854031	1.81218e-05	0.00028313
trd-1	-0.36597	0.100946	0.000288495	0.00322007
dnj-19	-0.365949	0.102241	0.000344565	0.00372954
C37H5.13	-0.365821	0.132251	0.00567288	0.0365749
C39D10.8	-0.365087	0.124452	0.00335094	0.0241058
mrpl-9	-0.36507	0.110809	0.000985688	0.00890118
inf-1	-0.364663	0.0756102	1.41462e-06	2.77592e-05
mtss-1	-0.364387	0.123112	0.00307853	0.0225942
slc-17.4	-0.364157	0.129047	0.00477412	0.0319619
F26E4.3	-0.363782	0.127279	0.00426134	0.0292015
Y32H12A.8	-0.363208	0.131669	0.0058068	0.0372148
D1054.3	-0.362971	0.122593	0.00306855	0.0225329
B0041.8	-0.362797	0.131664	0.00586065	0.0374609
C16C10.1	-0.362607	0.119243	0.00235873	0.0181818
rnf-113	-0.362426	0.128811	0.00489855	0.0326851
mrpl-46	-0.36158	0.122178	0.00308195	0.0226074
prdx-6	-0.361119	0.13408	0.00707463	0.0433107
Y65B4A.6	-0.361029	0.0864219	2.94711e-05	0.000435573
ttc-7	-0.360842	0.136275	0.00809943	0.0483696
F13H8.2	-0.359549	0.108324	0.000902799	0.00832509
dct-18	-0.359536	0.113013	0.00146575	0.0122897
pqn-20	-0.359411	0.103443	0.000511812	0.00523519
rpt-6	-0.359196	0.0908427	7.6841e-05	0.00101236
coa-4	-0.358955	0.109734	0.00107112	0.00954295
tkt-1	-0.358938	0.0645865	2.737e-08	7.23312e-07
F27D4.4	-0.358664	0.0847563	2.3192e-05	0.000353247
C35D10.10	-0.358618	0.125006	0.00412015	0.0284154
daf-31	-0.357787	0.109247	0.00105647	0.00944262
tra-3	-0.357393	0.134112	0.00770129	0.0464944
Y53C12B.1	-0.357233	0.107247	0.000865507	0.00809896
dmd-7	-0.357227	0.120723	0.00308584	0.0226122
R12C12.7	-0.356232	0.129839	0.00607625	0.038552
selt-1.1	-0.356017	0.109987	0.00120835	0.0105171
sec-24.2	-0.355929	0.0989954	0.000323885	0.00354698
C04B4.2	-0.355615	0.131293	0.00675754	0.0419006
clik-1	-0.355043	0.0645961	3.87722e-08	9.99908e-07
R02F2.7	-0.354738	0.121311	0.00345345	0.0246837
tag-335	-0.354497	0.106147	0.000838693	0.00790104
pfs-2	-0.354473	0.121322	0.00348058	0.0248267
hacd-1	-0.353672	0.0898109	8.21772e-05	0.00107454
mrps-34	-0.353555	0.119336	0.00304977	0.0224186
dnj-20	-0.35338	0.0627312	1.76849e-08	4.82857e-07
C49H3.9	-0.352932	0.101826	0.000528215	0.00537147
mct-6	-0.352185	0.0680653	2.28856e-07	5.198e-06
R74.7	-0.352024	0.0971267	0.000289653	0.00323041
dss-1	-0.351724	0.125022	0.00490354	0.0326926
aass-1	-0.351193	0.0781668	7.02713e-06	0.000118984
pbs-4	-0.351071	0.118908	0.0031525	0.0230171
slc-25A46	-0.350864	0.12283	0.00428339	0.0292711
timm-17B.1	-0.349747	0.109699	0.00143146	0.012053
tars-1	-0.348992	0.0761628	4.60152e-06	8.18786e-05
C10G8.8	-0.348936	0.127201	0.00608442	0.0385863
xdh-1	-0.348658	0.116604	0.00278884	0.0207963
nol-16	-0.347588	0.095584	0.000276409	0.00311759
tufm-2	-0.347477	0.119068	0.00351949	0.025053
F02E8.4	-0.347398	0.110121	0.00160669	0.0132721
rpn-5	-0.347172	0.0747899	3.45111e-06	6.30235e-05
orc-1	-0.346515	0.105044	0.000971111	0.00882667
nol-2	-0.345669	0.0769336	7.01998e-06	0.000118984
fah-1	-0.345542	0.0813057	2.13849e-05	0.000328955
C16C10.8	-0.345411	0.129584	0.00768674	0.0464266
eif-2beta	-0.344875	0.076021	5.71756e-06	9.88493e-05
gcn-1	-0.34358	0.0874462	8.52868e-05	0.00110793
hsp-110	-0.342531	0.0723453	2.19419e-06	4.17644e-05
lam-1	-0.342469	0.0843126	4.86758e-05	0.000683224
wdr-46	-0.341673	0.0903922	0.000156893	0.00189522
K10C3.4	-0.341444	0.107664	0.0015171	0.012667
hut-1	-0.341237	0.10587	0.00126781	0.0109121
abce-1	-0.340738	0.0697477	1.03272e-06	2.08215e-05
E01A2.1	-0.340471	0.118502	0.00406436	0.028114
alh-6	-0.340065	0.0809608	2.66484e-05	0.000400644
pmp-1	-0.339922	0.100525	0.000720976	0.00693728
F42A9.6	-0.338336	0.113533	0.0028818	0.0213866
F42A10.5	-0.338141	0.0906694	0.000191944	0.00226373
F33H2.2	-0.337974	0.120514	0.00504051	0.0334245
gfm-1	-0.337827	0.0728589	3.53977e-06	6.43897e-05
acs-19	-0.337807	0.0721509	2.8417e-06	5.30755e-05
stc-1	-0.337658	0.096	0.000436005	0.00454985
tag-72	-0.337607	0.121406	0.00542243	0.0353005
mrpl-37	-0.337423	0.0992679	0.000676034	0.00657657
gpi-1	-0.337022	0.0824864	4.39277e-05	0.000625527
F17C8.9	-0.336567	0.127508	0.00830114	0.0491585
sar-1	-0.335542	0.0756054	9.07684e-06	0.000150226
trap-2	-0.335072	0.0790439	2.2446e-05	0.000342633
acl-7	-0.334458	0.0995745	0.000782615	0.00742526
Y39B6A.33	-0.333958	0.0923542	0.000299123	0.00331219
Y54F10AL.1	-0.333491	0.110914	0.00264055	0.0198604
rrn-3.1	-0.333456	0.0923406	0.000304844	0.00336752
trap-4	-0.33279	0.0975849	0.000649003	0.00638568
cct-2	-0.332358	0.0627836	1.1986e-07	2.84888e-06
ssb-1	-0.332212	0.104026	0.00140539	0.0118632
rpn-7	-0.331898	0.0867845	0.000131093	0.0016229
vacl-14	-0.331793	0.122214	0.00663057	0.0413359
ahsa-1	-0.330984	0.0795361	3.16267e-05	0.000465951
lsm-8	-0.32912	0.124335	0.00811999	0.048456
yars-1	-0.329118	0.0773022	2.06686e-05	0.000319337
W02D3.4	-0.328835	0.109399	0.00264864	0.0199105
sek-1	-0.327527	0.114117	0.00410345	0.0283339
Y57E12AL.6	-0.327207	0.0929102	0.0004287	0.00448704
pgam-5	-0.326288	0.0849447	0.000122443	0.00152802
ent-1	-0.325943	0.0925215	0.000426876	0.00447466
elpc-3	-0.324712	0.10456	0.00189947	0.0153187
ppm-1.G	-0.324564	0.107882	0.00262542	0.0197785
Y45G5AL.1	-0.324098	0.10808	0.00271144	0.020306
mrps-18C	-0.324093	0.0957104	0.000708717	0.00683346
eif-3.C	-0.32401	0.0712275	5.39148e-06	9.35596e-05
del-6	-0.323943	0.0801301	5.28362e-05	0.000732775
dhs-22	-0.322753	0.111036	0.0036522	0.0257611
pas-2	-0.322542	0.0770364	2.8281e-05	0.000419763
tin-44	-0.322252	0.0958181	0.000770542	0.00733829
mrps-35	-0.322217	0.0913804	0.00042172	0.00443062
laf-1	-0.321766	0.0760729	2.33999e-05	0.000355637
ears-1	-0.321411	0.0703231	4.86565e-06	8.5857e-05
rpn-8	-0.321389	0.0835838	0.000120502	0.00150919
alh-9	-0.321081	0.0720207	8.26618e-06	0.000137954
hars-1	-0.321043	0.0825014	9.96805e-05	0.00127008
tag-10	-0.320843	0.113036	0.00453369	0.0306612
ima-2	-0.319863	0.062839	3.57677e-07	7.73691e-06
oma-2	-0.319742	0.079687	6.00869e-05	0.000821089
ztf-4	-0.319287	0.11768	0.00666409	0.0414522
uba-2	-0.318701	0.103795	0.00213702	0.016845
Y18D10A.11	-0.317923	0.0875826	0.000283443	0.00317639
exoc-8	-0.317901	0.0997703	0.00144091	0.0121106
tomm-22	-0.317118	0.100977	0.00168667	0.0138426
B0564.7	-0.316324	0.11522	0.0060439	0.0384166
F44G4.1	-0.316284	0.0894	0.000403401	0.00426706
Y61A9LA.10	-0.316249	0.0823237	0.000122269	0.00152721
dad-1	-0.315762	0.0987334	0.00138326	0.0117279
Y51F10.2	-0.315308	0.0917158	0.000586285	0.00588056
zhit-3	-0.314809	0.112216	0.00502559	0.033353
F54D5.7	-0.314622	0.0946448	0.000886594	0.00822514
snr-2	-0.314036	0.116035	0.00680173	0.0419751
skr-18	-0.313954	0.115659	0.0066381	0.0413644
mboa-3	-0.313754	0.107917	0.00364504	0.0257448
F19B6.1	-0.313689	0.077343	4.99595e-05	0.000699834
phb-1	-0.313404	0.0694614	6.42429e-06	0.000110384
cra-1	-0.313161	0.0894785	0.000465526	0.00484703
Y94H6A.5	-0.313099	0.0990294	0.00156861	0.0130347
mrpl-47	-0.313074	0.104869	0.00283225	0.0210917
F11E6.3	-0.313056	0.0839311	0.000191544	0.00226093
nol-14	-0.31289	0.0949037	0.000977518	0.00887287
emb-5	-0.312885	0.0772613	5.12834e-05	0.000714078
C18D11.3	-0.312784	0.0919574	0.000670424	0.00654109
nhr-68	-0.311763	0.114158	0.00631476	0.0397759
pyk-1	-0.311253	0.0628459	7.32126e-07	1.51104e-05
inx-8	-0.311137	0.101322	0.00213505	0.016839
mfap-1	-0.31058	0.0899962	0.000558435	0.00562954
Y60A3A.9	-0.310269	0.0971643	0.00140685	0.0118673
sna-1	-0.31017	0.114908	0.00694889	0.0426616
sgt-1	-0.309943	0.069318	7.77368e-06	0.000130988
rpoa-1	-0.309654	0.102691	0.00256653	0.0194082
mtr-4	-0.309416	0.101611	0.00232586	0.018028
mrpl-14	-0.309141	0.114792	0.00708034	0.0433267
Y39A1A.14	-0.308772	0.110687	0.00527746	0.0346174
Y45G12B.2	-0.308726	0.11043	0.00517939	0.0341184
cct-6	-0.308304	0.071928	1.81687e-05	0.000283546
eftu-2	-0.3082	0.0910987	0.000716621	0.00690013
Y48B6A.1	-0.307085	0.0902546	0.000667887	0.0065209
tcc-1	-0.307076	0.0810735	0.000152095	0.0018533
C02F5.3	-0.306981	0.100736	0.00230847	0.0179231
toe-1	-0.306625	0.0853878	0.000329453	0.00360129
pfd-5	-0.306076	0.0942962	0.00117078	0.0102521
zif-1	-0.306057	0.109823	0.00532299	0.0348178
tomm-40	-0.305827	0.0739543	3.54426e-05	0.000516174
cee-1	-0.305658	0.106696	0.00417325	0.0286965
rme-2	-0.305333	0.081797	0.00018935	0.00223882
catp-6	-0.305145	0.0945782	0.00125368	0.0108276
dim-1	-0.304161	0.0670865	5.79139e-06	0.000100002
gfat-2	-0.303764	0.0790153	0.000120866	0.0015124
T26E3.4	-0.303737	0.104675	0.00371119	0.0261112
tbh-1	-0.303478	0.0779614	9.91496e-05	0.00126563
tag-123	-0.303403	0.102947	0.003207	0.0233164
dis-3	-0.303264	0.0946761	0.00135923	0.0116058
rsp-3	-0.302515	0.0754661	6.10736e-05	0.000832128
pbs-6	-0.302024	0.0847914	0.00036809	0.00395046
moma-1	-0.301704	0.0867463	0.00050515	0.00518224
ZK418.5	-0.301627	0.101455	0.00294896	0.0217808
smg-2	-0.301592	0.103326	0.00351351	0.0250356
rpt-4	-0.301553	0.0691754	1.30505e-05	0.000210255
memi-3	-0.301544	0.106948	0.00480918	0.0321657
cif-1	-0.30152	0.0842197	0.000343381	0.00372109
tsn-1	-0.301188	0.071183	2.32468e-05	0.000353695
ddx-27	-0.301094	0.0895527	0.000773238	0.00735394
C18E9.2	-0.300922	0.10169	0.00308431	0.0226122
mig-22	-0.300903	0.0893272	0.00075566	0.00721627
tpp-2	-0.300827	0.0849047	0.000395439	0.00419237
tba-4	-0.300327	0.0936647	0.00134406	0.0114904
eif-3.F	-0.300204	0.074623	5.74736e-05	0.000788675
Y75B8A.24	-0.300199	0.090883	0.000956101	0.0087415
lcmt-1	-0.300155	0.113173	0.00799732	0.0480114
dlc-1	-0.300052	0.0822543	0.00026443	0.00300434
T14G10.5	-0.299942	0.101418	0.00310167	0.0227043
rpac-40	-0.299856	0.0953833	0.00166832	0.0137162
T07E3.3	-0.299852	0.11145	0.00713539	0.0435872
ran-4	-0.299427	0.0899534	0.000872571	0.00813777
lin-10	-0.298879	0.111864	0.00754451	0.0458055
tatn-1	-0.298791	0.0880013	0.00068553	0.00665589
D2092.4	-0.298637	0.113318	0.00840376	0.0496398
rpt-2	-0.298358	0.0689517	1.5111e-05	0.000240397
abcf-3	-0.298151	0.0815361	0.000255504	0.00291479
F35A5.1	-0.29792	0.103504	0.00399777	0.0277689
hpo-32	-0.297063	0.104504	0.00447492	0.0303373
haf-6	-0.296743	0.112325	0.00824573	0.0489465
pars-1	-0.295448	0.0702928	2.63283e-05	0.000396259
ccdc-47	-0.295104	0.0718696	4.02382e-05	0.000578171
chs-1	-0.294863	0.0994464	0.00302634	0.0222581
prp-31	-0.294654	0.0852777	0.000549823	0.00556
npp-2	-0.29463	0.0810809	0.000279301	0.00314006
nrfl-1	-0.29453	0.0920036	0.00136814	0.0116605
dnj-29	-0.294426	0.0811185	0.00028388	0.00317873
uri-1	-0.294207	0.111031	0.00805454	0.0481891
mars-1	-0.294081	0.0683071	1.66772e-05	0.000262322
oxa-1	-0.293961	0.0958656	0.00216663	0.0170592
F47G9.1	-0.293922	0.0845185	0.000505922	0.00518635
unc-59	-0.293849	0.0931257	0.00160279	0.0132477
act-2	-0.293524	0.0557319	1.38891e-07	3.2623e-06
rpn-12	-0.293126	0.0853773	0.000596287	0.00596685
T26G10.1	-0.29162	0.093246	0.00176347	0.0143883
let-630	-0.291396	0.0946345	0.00207574	0.0164363
eif-2gamma	-0.291256	0.0635629	4.60168e-06	8.18786e-05
ubc-13	-0.290768	0.0836283	0.000507225	0.00519208
T28C6.7	-0.290412	0.0947936	0.00218673	0.0171304
F53E2.2	-0.289523	0.0668456	1.48281e-05	0.000237249
cht-3	-0.289273	0.077956	0.000206665	0.00241288
ngp-1	-0.288979	0.0753272	0.000124895	0.00155307
fars-1	-0.288684	0.0744436	0.000105366	0.00133522
Y51H7C.1	-0.287677	0.100122	0.00406246	0.028114
F07F6.4	-0.28747	0.0917682	0.00173284	0.0141798
K02B12.7	-0.287344	0.108511	0.00809527	0.0483696
rpn-3	-0.287104	0.091069	0.00161823	0.0133437
C05D11.1	-0.285779	0.0838967	0.000658445	0.00644224
mdf-1	-0.285253	0.0931354	0.00219294	0.0171648
eif-3.L	-0.284418	0.0839638	0.000705609	0.0068082
eef-1B.2	-0.284076	0.104826	0.00672894	0.0417625
dap-3	-0.282763	0.0962576	0.00330801	0.0238626
W04A4.5	-0.282668	0.105228	0.00722635	0.0440656
rsp-4	-0.282626	0.103745	0.00644475	0.0404304
cogc-6	-0.28203	0.103322	0.00634062	0.0398847
cyb-3	-0.282016	0.0799759	0.00042147	0.00443062
T20H4.5	-0.281817	0.106085	0.00789481	0.0474777
eif-6	-0.281803	0.0731167	0.000116128	0.00145834
rpc-1	-0.281736	0.0989437	0.00440727	0.0299368
ribo-1	-0.281236	0.0900166	0.00178247	0.0145076
dlat-1	-0.28077	0.0756284	0.000205228	0.00239811
F21D5.1	-0.280668	0.0952746	0.00322035	0.0234012
C44B7.5	-0.280158	0.0866996	0.001232	0.0106697
B0464.6	-0.279718	0.0930057	0.00263375	0.0198306
ZK809.8	-0.279551	0.0822248	0.000674262	0.00656665
pcca-1	-0.279501	0.0858947	0.00113796	0.0100169
pas-3	-0.279328	0.0772244	0.000297931	0.00330162
kin-3	-0.278984	0.0721102	0.000109348	0.00138065
cth-2	-0.278729	0.0835527	0.000850023	0.00798965
B0238.11	-0.278642	0.0912065	0.00225014	0.0175385
usp-14	-0.278181	0.0843805	0.000978101	0.00887287
xpo-2	-0.277994	0.0811669	0.000614873	0.00611891
eif-3.E	-0.27777	0.0773548	0.000329594	0.00360129
nol-58	-0.277505	0.0689814	5.74887e-05	0.000788675
rsks-1	-0.277313	0.0759924	0.000263029	0.0029933
K05C4.5	-0.277067	0.0865789	0.00137349	0.0116912
pdhb-1	-0.2764	0.0696919	7.3082e-05	0.000973868
teg-4	-0.27636	0.0896296	0.00204684	0.0162536
vpr-1	-0.276193	0.100459	0.00597189	0.0380804
C18A3.3	-0.274893	0.0793346	0.000530267	0.00538449
let-60	-0.274734	0.0885784	0.00192483	0.0154518
ran-1	-0.274665	0.0724491	0.000149957	0.00183137
C05D11.9	-0.274661	0.101734	0.00693814	0.0426436
mog-5	-0.272934	0.0894331	0.00227454	0.017699
dpt-1	-0.272878	0.0854643	0.0014086	0.0118748
cbd-1	-0.271558	0.0772172	0.000436783	0.00455455
T28D6.6	-0.27143	0.100466	0.00689866	0.0424383
gfat-1	-0.271165	0.0861324	0.00164261	0.0135288
rbm-5	-0.270685	0.0970873	0.00530257	0.0347331
F19F10.9	-0.270642	0.0955803	0.00463203	0.0311451
cct-5	-0.270302	0.0627573	1.65414e-05	0.00026048
rpn-13	-0.269748	0.0913739	0.00315589	0.0230287
tofu-2	-0.269662	0.0917602	0.00329523	0.0238025
enol-1	-0.269553	0.0666592	5.26035e-05	0.000731
mrps-30	-0.269231	0.0961437	0.00510558	0.0337379
dnj-11	-0.269138	0.0727758	0.000217148	0.00252303
gly-10	-0.268976	0.0925053	0.00364125	0.0257359
nmt-1	-0.268755	0.0688923	9.5757e-05	0.00122794
hxk-2	-0.268743	0.0956948	0.00497987	0.0331326
cct-4	-0.268571	0.0807409	0.000879992	0.0081851
cchl-1	-0.26761	0.090167	0.0029981	0.022062
ctc-1	-0.266943	0.086004	0.00191023	0.0153611
ZK686.3	-0.2667	0.0988318	0.00696486	0.0427325
pas-6	-0.266264	0.0750405	0.000387773	0.00413061
arf-3	-0.265978	0.076328	0.000492742	0.00507361
Y105E8A.3	-0.265961	0.0948784	0.00506023	0.0335266
Y71H10B.1	-0.265916	0.0799614	0.000882442	0.00820241
F56A8.3	-0.265729	0.0906654	0.00338004	0.0242709
suca-1	-0.26485	0.0775195	0.000634174	0.00627518
ftn-2	-0.264438	0.0765383	0.000550341	0.00556
chdp-1	-0.264168	0.0755705	0.000472905	0.00490556
snr-4	-0.263562	0.0918323	0.00410427	0.0283339
aho-3	-0.26304	0.0906135	0.00369746	0.0260408
mans-2	-0.262973	0.0927691	0.00458676	0.0309152
eif-2A	-0.262623	0.0848876	0.00197632	0.0157564
nol-56	-0.262608	0.0599458	1.18265e-05	0.000192088
ubql-1	-0.262282	0.0836508	0.00171601	0.0140586
ubh-4	-0.26206	0.0894974	0.00341012	0.0244366
F11C1.5	-0.261419	0.0768753	0.000672496	0.00655672
F25E2.2	-0.261343	0.0885499	0.00316376	0.0230741
sqd-1	-0.261248	0.0588717	9.09734e-06	0.000150386
alp-1	-0.260988	0.0827941	0.00162014	0.0133516
prmt-1	-0.260531	0.056487	3.98361e-06	7.18078e-05
erfa-3	-0.260298	0.0793325	0.00103403	0.00927171
W09C5.7	-0.260001	0.0907325	0.00416251	0.0286509
W08E12.7	-0.259012	0.060909	2.1146e-05	0.000325639
rpn-6.1	-0.258778	0.0950035	0.00645194	0.0404573
fars-3	-0.25837	0.0896008	0.00393206	0.0273889
hpo-8	-0.258352	0.0818758	0.00160267	0.0132477
C16A3.6	-0.258107	0.0938378	0.00594928	0.0379535
T10B5.3	-0.255869	0.0894546	0.00423208	0.0290437
cct-7	-0.254983	0.0664469	0.000124344	0.00154786
rpn-9	-0.2547	0.0674359	0.000158779	0.00191468
ctps-1	-0.254171	0.0881352	0.0039281	0.0273751
rad-23	-0.254104	0.0691713	0.000239215	0.00275373
C28H8.4	-0.253858	0.0848239	0.00276457	0.0206484
C07D8.6	-0.253806	0.0760843	0.000850391	0.00798965
npp-10	-0.253059	0.0738382	0.00060981	0.00607811
uba-1	-0.252591	0.0716945	0.000426428	0.00447457
Y111B2A.3	-0.252438	0.0904879	0.00527494	0.0346171
prp-19	-0.251822	0.075322	0.000827973	0.00781589
gln-3	-0.251504	0.0684946	0.000240768	0.00276477
bckd-1B	-0.251221	0.0752219	0.000838586	0.00790104
ostb-1	-0.250409	0.0764683	0.00105785	0.00944887
plrg-1	-0.250385	0.0944629	0.00803432	0.0480888
eef-1A.2	-0.249778	0.064698	0.000113072	0.00142381
ZK550.3	-0.24866	0.0864918	0.0040409	0.0280212
hrde-1	-0.2484	0.080688	0.00208026	0.0164628
rmd-1	-0.248396	0.0857425	0.00376751	0.0264259
pges-2	-0.248358	0.0904449	0.00603354	0.0383683
K12H4.3	-0.247973	0.0930024	0.00766892	0.0463792
dars-1	-0.247658	0.0689695	0.000329619	0.00360129
aqp-7	-0.247589	0.0655171	0.000157464	0.00190046
pno-1	-0.24748	0.0780584	0.00152206	0.0127009
rae-1	-0.246999	0.0931675	0.00802233	0.0480582
aldo-1	-0.246619	0.0732488	0.000760257	0.0072552
R05H5.3	-0.245478	0.0743347	0.00095883	0.00874658
B0416.5	-0.245223	0.0888092	0.00575824	0.0370225
spg-7	-0.244754	0.0798302	0.00216991	0.0170718
gsy-1	-0.244334	0.0902859	0.00680532	0.0419751
Y48G8AL.5	-0.243859	0.0834537	0.0034769	0.0248131
dao-5	-0.243617	0.0912641	0.00759953	0.0460794
pqn-22	-0.243139	0.0710912	0.000625989	0.00620739
Y45F10D.7	-0.242116	0.0891728	0.00662498	0.0413359
kin-10	-0.24164	0.0788542	0.0021811	0.0170981
C05C10.3	-0.241514	0.0728962	0.000922624	0.0084769
mdh-2	-0.241391	0.0665543	0.000286761	0.00320328
Y54E10A.10	-0.241323	0.0874014	0.00576088	0.0370225
cyb-2.1	-0.241249	0.0867996	0.00544622	0.0354246
tct-1	-0.240921	0.0638241	0.000160154	0.00192959
rars-1	-0.239584	0.0823798	0.00363422	0.0257103
sel-10	-0.237988	0.0768762	0.00196327	0.0156895
ruvb-1	-0.237208	0.085484	0.00552224	0.0358022
egg-1	-0.237159	0.0786912	0.00258005	0.0194788
W08F4.3	-0.236921	0.0848001	0.00520806	0.034275
copd-1	-0.23683	0.0819988	0.00387445	0.0270823
lars-1	-0.236335	0.0624711	0.000154882	0.00188232
pdi-1	-0.234397	0.0764558	0.00217101	0.0170718
Y92H12BR.3	-0.234024	0.0853247	0.00609271	0.0386083
ola-1	-0.233985	0.0693857	0.00074562	0.00713994
pbs-3	-0.232817	0.0824282	0.0047357	0.0317503
gyg-1	-0.232722	0.0859297	0.0067632	0.0419006
iffb-1	-0.232251	0.0816561	0.0044515	0.0302078
T24H7.2	-0.2322	0.0773147	0.00267057	0.020043
ubc-20	-0.231414	0.0821448	0.00484523	0.0323913
rpt-1	-0.231124	0.0767377	0.00259644	0.0195749
ltah-1.2	-0.231046	0.0855975	0.00695024	0.0426616
rnr-2	-0.23082	0.0775663	0.00292251	0.0216114
sec-23	-0.230692	0.0784862	0.00328987	0.0237931
pas-4	-0.230455	0.0753992	0.00223966	0.0174666
lin-5	-0.230021	0.0852658	0.00698212	0.0428196
rsp-1	-0.229761	0.0824746	0.00533884	0.0348988
puf-12	-0.229297	0.0722378	0.0015025	0.0125752
sucg-1	-0.228868	0.0822853	0.00541257	0.035255
ile-1	-0.227974	0.076777	0.00298476	0.0219754
pbs-1	-0.227217	0.0778494	0.00351525	0.0250356
aars-2	-0.226803	0.0632777	0.000338058	0.00367335
cct-8	-0.224264	0.0681453	0.000998464	0.00900489
ctc-3	-0.223624	0.0847849	0.00835083	0.0493816
K01G5.5	-0.223521	0.061744	0.000294457	0.00327352
tiar-1	-0.222439	0.0775872	0.00414438	0.0285543
npp-14	-0.222248	0.0820311	0.00674236	0.0418272
pygl-1	-0.222146	0.075728	0.00335186	0.0241058
sao-1	-0.222007	0.0782528	0.00455319	0.0307344
vbh-1	-0.221724	0.0644074	0.000576316	0.00578889
rsp-7	-0.221677	0.0827479	0.00738547	0.0449181
T22D1.3	-0.221416	0.0716256	0.00199283	0.0158699
rpn-1	-0.221291	0.071499	0.001968	0.015717
copa-1	-0.221203	0.0658093	0.000775832	0.00737358
ubr-5	-0.221135	0.0803557	0.00592406	0.0378445
ufd-3	-0.220298	0.076186	0.00383306	0.0268334
glt-1	-0.216528	0.0760111	0.00439068	0.0298386
ogdh-2	-0.216423	0.0787568	0.00599624	0.0381776
npp-9	-0.215988	0.0647876	0.00085671	0.00803821
lbp-2	-0.215806	0.0675115	0.00139063	0.0117774
csr-1	-0.214311	0.0686345	0.00179323	0.0145714
ubc-7	-0.211701	0.0719975	0.00327795	0.0237582
sti-1	-0.211375	0.0777641	0.00656475	0.0410724
pfn-1	-0.211259	0.070571	0.00275741	0.020606
ifg-1	-0.211222	0.0642576	0.00101218	0.0091168
hpo-19	-0.208916	0.0771857	0.00679613	0.0419742
tcer-1	-0.207649	0.0779951	0.00776015	0.0467565
nuo-1	-0.205963	0.0761883	0.00686461	0.0422475
gsp-1	-0.205492	0.067862	0.002461	0.0187971
rpt-3	-0.204567	0.0745496	0.00606873	0.0385261
ddx-19	-0.203904	0.0745915	0.00626432	0.039504
hel-1	-0.201926	0.0692565	0.00354971	0.0252424
iars-1	-0.201724	0.0641033	0.00165034	0.0135844
chc-1	-0.198645	0.0750756	0.0081466	0.0485732
folt-2	-0.196895	0.0650275	0.00246285	0.0187974
Y71F9AL.9	-0.195909	0.0656316	0.00283601	0.0210917
spk-1	-0.195706	0.0719776	0.00654826	0.0409876
B0511.6	-0.194894	0.0737277	0.00820692	0.0488078
ima-3	-0.194146	0.0660557	0.00329133	0.0237931
tba-1	-0.188882	0.0659067	0.00415836	0.0286364
fat-1	-0.18765	0.0662587	0.00462449	0.0311094
atp-2	-0.187617	0.0596406	0.00165642	0.0136264
cgh-1	-0.184864	0.064	0.00387082	0.0270705
F32D1.5	-0.18378	0.0625649	0.0033095	0.0238626
rack-1	-0.183494	0.0567606	0.00122595	0.0106239
gpd-3	-0.173841	0.0648264	0.00732636	0.0445974
ndk-1	-0.160912	0.0586215	0.00605233	0.0384527
rps-5	-0.155016	0.0552154	0.00499312	0.0332049

## Sheet: 6
gene	log2FoldChange	lfcSE	pvalue	padj
catp-2	14.7716	1.18062	6.43747e-36	1.00916e-33
nhx-6	14.395	1.18071	3.43615e-34	4.84255e-32
C02E7.10	12.0027	1.18439	3.90034e-24	3.4011e-22
F07C6.6	8.66354	1.20286	5.91317e-13	2.69609e-11
F59A6.10	7.93218	1.25717	2.79811e-10	9.38444e-09
Y49F6B.12	6.99525	1.32656	1.34041e-07	3.15368e-06
ZK970.7	6.76628	0.258103	1.77071e-151	2.4705e-148
H23N18.6	6.76029	1.50153	6.72327e-06	0.000114924
nspe-6	6.69398	1.37703	1.16703e-06	2.32532e-05
T26H5.9	6.6263	0.886021	7.50539e-14	3.73983e-12
ilys-3	6.62271	0.884267	6.91383e-14	3.46985e-12
F14F9.3	6.51662	1.3937	2.92864e-06	5.45532e-05
dct-19	6.2868	1.29578	1.22372e-06	2.42863e-05
dod-3	6.27418	0.395356	1.02705e-56	3.39868e-54
K01A6.7	6.27231	1.42661	1.09933e-05	0.000179181
F02H6.6	6.16366	1.45126	2.16542e-05	0.000332365
col-44	5.92472	1.3111	6.21631e-06	0.000107206
C50F7.5	5.85227	1.01934	9.39879e-09	2.65449e-07
fipr-26	5.71608	1.13863	5.16376e-07	1.09324e-05
cnc-4	5.59832	0.875779	1.63307e-10	5.5982e-09
pitr-4	5.46237	1.14962	2.01942e-06	3.87018e-05
Y58A7A.4	5.41185	0.937368	7.76642e-09	2.21589e-07
fip-6	5.39944	0.397344	4.66566e-42	9.29933e-40
B0563.10	5.35337	1.16239	4.11506e-06	7.3891e-05
C54F6.12	5.05901	0.990423	3.25719e-07	7.13411e-06
T22B7.3	4.81195	0.49406	2.04345e-22	1.65757e-20
mltn-9	4.72747	0.243252	3.94527e-84	2.29352e-81
str-144	4.59404	0.929421	7.69654e-07	1.58381e-05
catp-3	4.53073	0.086631	0	0
C04G6.2	4.51562	1.21401	0.000199552	0.00233963
scl-2	4.46752	0.321412	6.36417e-44	1.47988e-41
C08F11.13	4.46166	0.148562	3.71519e-198	8.63905e-195
parg-2	4.28632	0.265361	1.08567e-58	3.7868e-56
ilys-2	4.20859	0.534606	3.48132e-15	1.88261e-13
cng-1	4.0768	0.403325	5.09276e-24	4.41331e-22
R07B1.13	4.03568	1.23093	0.00104337	0.00934283
C02E7.6	4.02296	0.760506	1.22421e-07	2.9048e-06
M03A1.8	4.01922	0.928868	1.51145e-05	0.000240397
str-7	4.01919	1.03274	9.95183e-05	0.00126918
mltn-12	3.99429	0.573869	3.39603e-12	1.44017e-10
C42D4.3	3.93808	0.160634	1.00144e-132	1.27018e-129
comt-4	3.89654	0.47223	1.56578e-16	9.06466e-15
cyp-14A5	3.89474	0.1132	2.07182e-259	1.4453e-255
grl-7	3.78579	0.545706	3.99343e-12	1.66815e-10
R05H10.1	3.73446	0.299581	1.15019e-35	1.76346e-33
F57A8.7	3.71471	0.859116	1.53315e-05	0.000243074
fipr-23	3.67783	1.27951	0.0040479	0.0280558
pitr-5	3.56496	0.160068	6.98565e-110	6.9617e-107
ghi-1	3.56025	0.285883	1.33801e-35	2.02911e-33
jmjd-3.3	3.50039	1.12979	0.00194657	0.0155994
col-113	3.47884	0.294033	2.6843e-32	3.40467e-30
tag-297	3.47005	0.33965	1.67176e-24	1.48563e-22
nspe-7	3.42995	0.501112	7.66468e-12	3.07292e-10
oac-14	3.38644	0.392104	5.79084e-18	3.70614e-16
K08F9.1	3.38505	1.05818	0.00137938	0.0117134
C29F3.3	3.36952	0.727148	3.58878e-06	6.51961e-05
T19C3.2	3.3648	1.07051	0.00167131	0.0137246
T01C3.11	3.35006	1.09422	0.0022016	0.0172125
far-3	3.33044	0.215842	1.02923e-53	2.93058e-51
jud-4	3.29282	0.73878	8.30731e-06	0.000138475
F14D7.10	3.29282	0.890374	0.000217098	0.00252303
K04C2.5	3.27805	0.9642	0.000674456	0.00656665
mec-10	3.27046	0.420503	7.39723e-15	3.96947e-13
argk-1	3.23951	0.173775	1.46805e-77	7.06283e-75
Y38E10A.28	3.18899	0.623764	3.17929e-07	6.99644e-06
grl-22	3.16915	0.712992	8.79485e-06	0.000145904
F53A9.8	3.12438	0.365103	1.15303e-17	7.24645e-16
pho-8	3.09032	0.232522	2.63093e-40	4.82983e-38
cyp-13B1	3.06814	0.855496	0.000335289	0.0036518
lgc-21	3.06671	0.44114	3.60689e-12	1.52034e-10
F13H8.5	3.06666	0.431821	1.23239e-12	5.44123e-11
E01G6.1	3.03241	0.83231	0.000269096	0.00304743
R02E4.3	3.02724	0.771199	8.65967e-05	0.00112286
F35B3.4	3.02369	0.29072	2.46118e-25	2.27406e-23
nas-10	3.00582	0.978275	0.00212226	0.0167571
grl-21	3.00193	0.185864	1.11281e-58	3.7868e-56
twk-45	2.96823	0.454235	6.37883e-11	2.29375e-09
F59E11.7	2.94761	0.428397	5.96166e-12	2.42347e-10
F14F9.4	2.93848	0.260811	1.9159e-29	2.08833e-27
nspb-12	2.92718	0.542886	6.97215e-08	1.73706e-06
F57H12.6	2.919	0.225135	1.91855e-38	3.26433e-36
col-169	2.88979	0.199806	2.07509e-47	5.26394e-45
T21C9.9	2.88616	0.281459	1.13197e-24	1.01239e-22
Y77E11A.14	2.86782	0.535455	8.51517e-08	2.08062e-06
smf-3	2.86651	0.239565	5.38983e-33	7.1618e-31
F58A4.12	2.84309	0.967782	0.00330616	0.0238626
best-5	2.83166	0.382123	1.25989e-13	6.08234e-12
his-9	2.82915	1.01494	0.0053115	0.034759
his-13	2.82915	1.01494	0.0053115	0.034759
F01D5.6	2.79537	1.00603	0.00545885	0.0354736
K02E11.10	2.79063	0.520493	8.25256e-08	2.02354e-06
Y45F10D.6	2.78027	0.238463	2.06147e-31	2.43743e-29
Y41G9A.10	2.7738	0.307544	1.89496e-19	1.31534e-17
H20E11.2	2.76831	0.807265	0.00060527	0.0060449
C54D10.9	2.76645	0.94912	0.00355976	0.0252752
col-104	2.74453	0.246202	7.36506e-29	7.72612e-27
C49G9.2	2.74078	0.375456	2.88027e-13	1.36686e-11
clec-52	2.74064	0.176013	1.15168e-54	3.4931e-52
C04A11.5	2.68853	0.616152	1.28047e-05	0.000207252
col-14	2.6594	0.190165	1.93304e-44	4.57114e-42
Y39B6A.1	2.63959	0.0787154	1.57383e-246	7.31938e-243
nhr-119	2.63865	0.155052	6.05637e-65	2.28374e-62
F56D5.3	2.63742	0.219104	2.26203e-33	3.06406e-31
col-109	2.63678	0.268512	9.23649e-23	7.6253e-21
kcc-2	2.63071	0.0944384	9.02347e-171	1.57369e-167
VZK822L.2	2.55783	0.764973	0.000826708	0.00780923
T12D8.5	2.55613	0.367496	3.51279e-12	1.48516e-10
trx-3	2.53927	0.388828	6.55166e-11	2.34984e-09
ZC513.14	2.52691	0.745462	0.000699642	0.00676466
T24C4.4	2.5182	0.490929	2.90577e-07	6.44536e-06
cpt-3	2.50885	0.754686	0.000886186	0.00822514
grl-5	2.49234	0.765805	0.00113579	0.0100105
nlp-62	2.49144	0.657196	0.000150033	0.00183137
thn-2	2.49071	0.130403	2.52036e-81	1.40656e-78
tts-1	2.48844	0.184176	1.34389e-41	2.64084e-39
F53A9.7	2.48068	0.335987	1.5444e-13	7.43018e-12
nas-30	2.47608	0.512705	1.36921e-06	2.6982e-05
hmit-1.1	2.47215	0.207854	1.27641e-32	1.66435e-30
Y47D7A.13	2.45497	0.171555	1.8918e-46	4.63059e-44
F44E2.4	2.45182	0.365313	1.92555e-11	7.30035e-10
nas-38	2.44409	0.369056	3.53084e-11	1.30771e-09
trhr-1	2.44047	0.403445	1.45676e-09	4.50659e-08
nlp-30	2.43468	0.603794	5.52316e-05	0.000761454
Y38E10A.14	2.42725	0.17161	2.03426e-45	4.89345e-43
igeg-2	2.4175	0.528242	4.72804e-06	8.36066e-05
ptr-4	2.41203	0.443059	5.20873e-08	1.31891e-06
F11E6.11	2.39721	0.61095	8.71823e-05	0.0011294
gmeb-3	2.39592	0.630199	0.000143624	0.0017624
ttr-26	2.38006	0.222482	1.04264e-26	1.01727e-24
M03F4.6	2.37514	0.431962	3.83047e-08	9.89679e-07
col-115	2.35938	0.773023	0.00227207	0.0176897
T12B3.1	2.35492	0.663078	0.00038305	0.00409213
col-97	2.33943	0.175313	1.27869e-40	2.3787e-38
cpr-4	2.32877	0.0763764	3.46148e-204	9.65891e-201
oac-20	2.32196	0.168372	2.90137e-43	6.22767e-41
cth-1	2.31438	0.0857713	2.32902e-160	3.6105e-157
dpy-5	2.31371	0.261194	8.13346e-19	5.37811e-17
lys-7	2.30864	0.107742	7.42279e-102	6.47268e-99
C02E7.7	2.30755	0.460528	5.42401e-07	1.14487e-05
F38B7.2	2.3036	0.213967	4.97407e-27	4.92186e-25
T10C6.15	2.28711	0.693984	0.000982016	0.00888368
R03C1.1	2.28666	0.649049	0.000426547	0.00447457
col-175	2.28272	0.238932	1.24958e-21	9.63209e-20
srr-4	2.27963	0.166308	9.19172e-43	1.91407e-40
C45B2.2	2.27672	0.542716	2.72819e-05	0.000408847
ttr-37	2.26472	0.394963	9.80845e-09	2.75902e-07
Y69H2.3	2.25821	0.0784062	2.06253e-182	4.11093e-179
Y45G12C.1	2.25606	0.30113	6.7847e-14	3.41734e-12
ugt-29	2.24707	0.110403	4.34455e-92	2.88644e-89
col-90	2.24078	0.664021	0.000739318	0.00708932
F26G1.5	2.22025	0.196812	1.62715e-29	1.78756e-27
K05F6.10	2.21802	0.746975	0.00298447	0.0219754
cpr-1	2.21257	0.0722602	6.72179e-206	2.34456e-202
cyp-32B1	2.20329	0.688034	0.00136336	0.0116269
col-79	2.19565	0.555019	7.62215e-05	0.00100705
pqn-13	2.19421	0.803791	0.00633685	0.039879
abu-1	2.19061	0.326512	1.95774e-11	7.40229e-10
M162.5	2.18871	0.222861	9.14535e-23	7.595e-21
H10E21.4	2.18853	0.355974	7.84638e-10	2.52045e-08
ora-1	2.18761	0.509747	1.77412e-05	0.000277806
B0403.5	2.17457	0.245063	7.0864e-19	4.70807e-17
Y58A7A.3	2.17408	0.137006	1.04747e-56	3.39868e-54
Y34F4.2	2.17087	0.727239	0.00283503	0.0210917
K11G9.1	2.16617	0.49124	1.03566e-05	0.000169396
F53F1.6	2.16012	0.380574	1.37916e-08	3.80276e-07
Y95B8A.2	2.15161	0.244477	1.35746e-18	8.89167e-17
T23B12.5	2.14842	0.781843	0.00599809	0.0381776
T19B10.2	2.14736	0.138461	3.02746e-54	8.98704e-52
dpy-13	2.14241	0.233389	4.32962e-20	3.14619e-18
F41E6.11	2.14032	0.436739	9.55023e-07	1.9367e-05
daao-1	2.1335	0.397462	7.96989e-08	1.96807e-06
C27B7.9	2.1284	0.158902	6.5172e-41	1.24559e-38
oac-6	2.11733	0.402423	1.42924e-07	3.34017e-06
abu-10	2.11412	0.384737	3.9078e-08	1.00593e-06
F56B6.6	2.11311	0.662836	0.00143266	0.0120558
F13A7.11	2.11264	0.469649	6.84901e-06	0.000116533
ugt-5	2.10981	0.346593	1.14847e-09	3.62522e-08
F26A1.8	2.10236	0.51137	3.93568e-05	0.000567845
K04F1.9	2.10079	0.231677	1.21511e-19	8.51917e-18
F41F3.3	2.09823	0.432975	1.25925e-06	2.49207e-05
F01D4.8	2.08257	0.572867	0.000277607	0.00312858
ctl-1	2.08246	0.111672	1.31175e-77	6.53624e-75
C06E8.5	2.07332	0.347537	2.43488e-09	7.25886e-08
swt-6	2.06918	0.389786	1.10532e-07	2.64519e-06
abu-15	2.06661	0.301457	7.1116e-12	2.8594e-10
M03A1.3	2.06468	0.376405	4.12865e-08	1.05693e-06
T08B1.1	2.0636	0.0846944	3.99222e-131	4.64163e-128
mlt-8	2.05771	0.355885	7.38332e-09	2.11524e-07
cup-16	2.05543	0.39202	1.57832e-07	3.65792e-06
fbxa-21	2.04935	0.661623	0.00195188	0.0156329
F45E4.5	2.04774	0.227618	2.33277e-19	1.60329e-17
ttr-29	2.04117	0.331412	7.31967e-10	2.36398e-08
gst-13	2.03897	0.117936	5.71574e-67	2.21517e-64
dhs-5	2.0303	0.181593	5.08132e-29	5.45343e-27
clh-2	2.02726	0.286953	1.60857e-12	6.99151e-11
pqn-32	2.02188	0.569832	0.00038786	0.00413061
dct-5	2.02117	0.495475	4.51775e-05	0.000640565
F47H4.2	2.01844	0.67783	0.00290332	0.0214892
clec-218	2.01348	0.109105	4.79948e-76	2.23208e-73
Y47D3B.6	2.00919	0.295884	1.11772e-11	4.39281e-10
W03F8.6	2.00641	0.467794	1.79402e-05	0.000280607
T06E4.8	1.99995	0.487182	4.04077e-05	0.000580008
ZK180.5	1.98862	0.223823	6.40433e-19	4.27527e-17
grd-6	1.98506	0.266529	9.48902e-14	4.67812e-12
T20D4.10	1.96996	0.611936	0.00128534	0.0110562
T06D8.10	1.9404	0.451506	1.72636e-05	0.000270631
rol-1	1.92858	0.205397	6.02774e-21	4.52145e-19
col-49	1.92803	0.259885	1.18206e-13	5.7264e-12
F15B9.8	1.92314	0.632552	0.00236355	0.0182089
tts-2	1.9217	0.229755	6.05616e-17	3.59555e-15
irg-2	1.91991	0.556743	0.00056377	0.00567921
col-126	1.91752	0.164187	1.63499e-31	1.94969e-29
col-127	1.91752	0.164187	1.63499e-31	1.94969e-29
catp-1	1.91622	0.127334	3.52211e-51	9.63538e-49
F47B8.2	1.90708	0.275953	4.81632e-12	1.99399e-10
max-1	1.90524	0.304329	3.83887e-10	1.27523e-08
srd-14	1.89989	0.477848	7.01046e-05	0.000938773
T05E12.3	1.89945	0.356282	9.75078e-08	2.34962e-06
Y43F8B.3	1.89816	0.580527	0.00107652	0.00958495
Y39A3A.4	1.89531	0.626981	0.00250351	0.0190349
R12E2.7	1.88082	0.347803	6.3837e-08	1.59615e-06
nhx-4	1.87814	0.151182	1.9605e-35	2.94117e-33
C06B3.7	1.86802	0.467084	6.35213e-05	0.000860437
abu-14	1.86318	0.289041	1.1479e-10	3.98396e-09
col-63	1.85976	0.27688	1.85695e-11	7.07873e-10
fipr-22	1.84988	0.238552	8.85901e-15	4.71759e-13
E01G4.6	1.84897	0.257944	7.60474e-13	3.42262e-11
clec-7	1.84636	0.199727	2.36532e-20	1.74608e-18
Y18H1A.9	1.84265	0.559142	0.000982477	0.00888368
ZK1307.2	1.83906	0.591184	0.00186576	0.0150992
Y37E11B.7	1.8339	0.279614	5.42804e-11	1.96197e-09
clec-54	1.8276	0.34222	9.27235e-08	2.24987e-06
C30B5.6	1.82554	0.670324	0.00646211	0.0405028
C18H9.6	1.8208	0.18968	8.04862e-22	6.27343e-20
col-73	1.82036	0.151322	2.48131e-33	3.32878e-31
col-111	1.81275	0.37853	1.6769e-06	3.26762e-05
col-91	1.80994	0.212564	1.66854e-17	1.03464e-15
rol-6	1.80262	0.529159	0.000657819	0.00644062
clec-43	1.79665	0.326248	3.65011e-08	9.48348e-07
R12E2.15	1.79223	0.658433	0.00648964	0.0406571
col-157	1.79002	0.377886	2.16973e-06	4.13553e-05
dpy-4	1.78886	0.233179	1.69808e-14	8.84014e-13
D1086.3	1.78841	0.199375	2.96303e-19	1.99711e-17
ctl-2	1.78839	0.090144	1.36598e-87	8.28616e-85
asns-2	1.78656	0.0885833	1.86668e-90	1.18381e-87
F56D2.5	1.78617	0.256524	3.33155e-12	1.41713e-10
K01D12.5	1.78524	0.634583	0.00490436	0.0326926
col-17	1.78396	0.347491	2.83933e-07	6.34844e-06
cut-2	1.77989	0.243748	2.83154e-13	1.34831e-11
clec-41	1.77846	0.101395	7.10056e-69	2.83049e-66
sqt-1	1.77696	0.385928	4.13681e-06	7.40909e-05
Y58A7A.5	1.77684	0.318637	2.45564e-08	6.55089e-07
pqn-71	1.77254	0.541483	0.00106227	0.00947617
col-48	1.76777	0.229277	1.25627e-14	6.58927e-13
C28C12.4	1.76672	0.430151	4.00476e-05	0.00057662
ttr-23	1.75613	0.453317	0.000107087	0.00135456
col-107	1.75283	0.213529	2.23273e-16	1.28193e-14
F07C6.2	1.74857	0.571144	0.00220214	0.0172125
col-58	1.74362	0.593332	0.00329604	0.0238025
ZK662.2	1.74105	0.415457	2.78124e-05	0.00041457
T19A5.3	1.73613	0.498569	0.000497284	0.00510906
grl-16	1.73372	0.190908	1.07142e-19	7.54969e-18
pqn-36	1.73228	0.311704	2.73731e-08	7.23312e-07
D2045.8	1.72842	0.325923	1.1382e-07	2.71455e-06
abu-11	1.72654	0.318598	5.98752e-08	1.50519e-06
K08B5.1	1.72372	0.342885	4.97955e-07	1.05745e-05
F21A3.11	1.71879	0.252504	9.96801e-12	3.95096e-10
col-138	1.71786	0.207846	1.39651e-16	8.15233e-15
M01A8.1	1.71693	0.466625	0.000233727	0.00269947
col-38	1.70786	0.164318	2.65079e-25	2.43315e-23
dos-1	1.70614	0.247014	4.94864e-12	2.03668e-10
col-65	1.70507	0.279469	1.05339e-09	3.33262e-08
C49G7.10	1.69864	0.286613	3.09236e-09	9.14082e-08
F32D8.7	1.69317	0.34116	6.94163e-07	1.44336e-05
fmo-1	1.67978	0.271208	5.87762e-10	1.90708e-08
C09F9.7	1.6771	0.501683	0.000828911	0.00781945
C42D4.1	1.67605	0.0809565	3.24568e-95	2.38335e-92
Y54G2A.11	1.67319	0.112978	1.26403e-49	3.39149e-47
nas-9	1.66854	0.121961	1.31989e-42	2.66885e-40
Y54G2A.52	1.66378	0.47039	0.000404657	0.00427711
K04H4.2	1.66308	0.545524	0.0022991	0.0178603
ZK180.6	1.65204	0.27923	3.2901e-09	9.68428e-08
pho-9	1.64967	0.231023	9.2846e-13	4.15188e-11
F54B8.4	1.64555	0.5148	0.00139113	0.0117774
clec-265	1.64555	0.131549	6.66393e-36	1.03306e-33
R07E3.7	1.64013	0.449776	0.000265788	0.00301731
K10H10.4	1.64008	0.328842	6.11829e-07	1.2798e-05
C10C5.2	1.63698	0.507585	0.00125959	0.010848
C16D9.1	1.62791	0.238825	9.33874e-12	3.72269e-10
ptr-1	1.62503	0.501564	0.00119561	0.0104257
F55G1.15	1.62499	0.320074	3.83618e-07	8.25962e-06
clec-150	1.61878	0.0772716	1.90929e-97	1.56696e-94
F28F5.6	1.61484	0.320537	4.70652e-07	1.00253e-05
col-71	1.61342	0.20008	7.3918e-16	4.15848e-14
F53B1.4	1.61337	0.444288	0.000281926	0.00316193
R09A1.3	1.61035	0.469905	0.000610337	0.00607811
C26F1.1	1.6017	0.287027	2.40096e-08	6.42959e-07
C05B5.5	1.59783	0.553617	0.00389976	0.0272047
T24C2.5	1.5973	0.257536	5.56646e-10	1.81033e-08
Y69H2.9	1.59651	0.461928	0.000547887	0.00555129
T06E4.9	1.58771	0.48652	0.00110085	0.00976415
T24B8.5	1.58196	0.384935	3.96208e-05	0.000571064
tre-5	1.58176	0.418096	0.000154801	0.00188232
Y48G8AL.12	1.58062	0.344047	4.34434e-06	7.76085e-05
col-145	1.57917	0.124189	4.82761e-37	7.92409e-35
F49F1.5	1.56621	0.477299	0.0010329	0.00926756
gst-9	1.56523	0.42353	0.000219308	0.00254135
erp-44.3	1.55954	0.320832	1.16832e-06	2.32532e-05
ets-9	1.55751	0.393591	7.58414e-05	0.00100298
F13D11.4	1.55461	0.295684	1.45898e-07	3.40396e-06
B0310.2	1.55424	0.285852	5.41144e-08	1.36776e-06
R05G6.10	1.55418	0.222093	2.59896e-12	1.10889e-10
ttr-30	1.54956	0.218009	1.17937e-12	5.22369e-11
C09B9.85	1.54772	0.587794	0.008461	0.0498934
lys-2	1.54598	0.116996	7.29286e-40	1.32143e-37
pqn-54	1.54329	0.287644	8.08143e-08	1.99209e-06
col-120	1.54072	0.205517	6.5407e-14	3.30637e-12
his-11	1.53976	0.450343	0.000628339	0.00622627
Y51B9A.9	1.53442	0.582882	0.00847658	0.0499431
acox-1.5	1.52995	0.110785	2.21324e-43	4.82486e-41
col-60	1.52962	0.17048	2.90058e-19	1.96451e-17
col-89	1.52864	0.345655	9.75833e-06	0.000160174
che-12	1.52739	0.414279	0.000227039	0.00262657
lys-4	1.52108	0.0835984	5.63835e-74	2.45832e-71
sul-3	1.51713	0.21644	2.39205e-12	1.03006e-10
cutl-24	1.51323	0.373403	5.06675e-05	0.000707621
col-77	1.51279	0.169952	5.5191e-19	3.70204e-17
fat-5	1.50821	0.155782	3.61183e-22	2.8632e-20
best-8	1.50587	0.494885	0.00234337	0.0181196
fkb-4	1.50351	0.538677	0.00525278	0.0345042
ugt-7	1.50297	0.249298	1.65186e-09	5.05412e-08
pbo-4	1.50144	0.155526	4.73044e-22	3.70782e-20
F44A6.5	1.50141	0.250723	2.12024e-09	6.38912e-08
F59A7.2	1.49734	0.291703	2.85017e-07	6.35234e-06
col-170	1.49589	0.229685	7.37762e-11	2.62583e-09
lipl-2	1.49225	0.369341	5.33813e-05	0.000737862
ins-7	1.49076	0.463974	0.00131343	0.0112561
ifc-1	1.48942	0.111542	1.13665e-40	2.14305e-38
acs-2	1.48795	0.118637	4.39393e-36	6.96638e-34
T25E4.1	1.48154	0.490744	0.00253637	0.0192323
W02A2.4	1.47819	0.501172	0.0031832	0.0231917
tep-1	1.47178	0.090548	2.08841e-59	7.47117e-57
T17H7.7	1.47142	0.380909	0.000112042	0.00141212
lrp-1	1.46864	0.107272	1.1529e-42	2.36549e-40
B0034.1	1.46807	0.247768	3.11949e-09	9.20149e-08
suro-1	1.46516	0.242179	1.44944e-09	4.4939e-08
Y47D7A.15	1.45666	0.399708	0.000268113	0.00303912
tyr-2	1.45526	0.112284	2.04991e-38	3.44582e-36
clec-48	1.45193	0.115396	2.6475e-36	4.24574e-34
nnt-1	1.4509	0.485211	0.0027875	0.0207963
F53F8.4	1.44435	0.135523	1.607e-26	1.54626e-24
F21C10.10	1.43949	0.182825	3.44572e-15	1.87061e-13
T06E4.14	1.43809	0.390929	0.000234483	0.00270596
ZC204.12	1.43599	0.292205	8.90926e-07	1.81198e-05
C05E7.2	1.4308	0.321851	8.76721e-06	0.000145619
F53E10.1	1.42062	0.252462	1.83331e-08	4.99577e-07
sqt-2	1.41151	0.399255	0.000407212	0.00430085
C34E7.4	1.41071	0.15717	2.81563e-19	1.91627e-17
abu-8	1.40861	0.275909	3.30226e-07	7.21018e-06
E04F6.15	1.40349	0.237459	3.41193e-09	1.00217e-07
ttr-49	1.39335	0.284051	9.32955e-07	1.8947e-05
F35E12.9	1.39327	0.201984	5.27696e-12	2.16542e-10
icl-1	1.39239	0.0668931	3.15472e-96	2.44526e-93
nspb-1	1.38998	0.285374	1.11178e-06	2.22547e-05
B0281.3	1.3822	0.23669	5.22938e-09	1.51057e-07
C18E9.5	1.38202	0.122841	2.30272e-29	2.49051e-27
C25H3.10	1.37971	0.203355	1.16314e-11	4.5457e-10
F10E9.12	1.37395	0.269507	3.43199e-07	7.44684e-06
ZK84.1	1.37069	0.16285	3.86612e-17	2.325e-15
T12A7.6	1.36799	0.317119	1.60465e-05	0.000253546
sago-2	1.36603	0.22189	7.44509e-10	2.39894e-08
col-167	1.36183	0.262912	2.22139e-07	5.06419e-06
C04E6.7	1.36172	0.221925	8.46416e-10	2.69616e-08
F13H10.6	1.36069	0.274037	6.8583e-07	1.42816e-05
F41E7.1	1.35688	0.232214	5.11975e-09	1.48197e-07
F22B7.9	1.35508	0.132953	2.14976e-24	1.89832e-22
W09G12.7	1.3508	0.435265	0.00191314	0.0153757
F23F12.12	1.35012	0.201118	1.90529e-11	7.2432e-10
col-146	1.34371	0.260769	2.56511e-07	5.77233e-06
col-88	1.34261	0.178363	5.17616e-14	2.64534e-12
hpo-26	1.34208	0.243447	3.53081e-08	9.20023e-07
T28H10.3	1.34184	0.140329	1.15368e-21	8.94227e-20
grl-4	1.33474	0.110221	9.37764e-34	1.29541e-31
F13B12.3	1.33223	0.287154	3.4934e-06	6.36292e-05
pqn-2	1.33096	0.325397	4.3089e-05	0.00061596
Y57G11C.42	1.32769	0.320539	3.44186e-05	0.000502836
C34F11.8	1.32619	0.263714	4.93267e-07	1.04909e-05
Y69A2AL.2	1.32554	0.207169	1.5708e-10	5.39798e-09
T01D1.4	1.32507	0.145871	1.04799e-19	7.4221e-18
Y73C8B.1	1.32389	0.388033	0.000645336	0.00636305
alh-13	1.32239	0.199683	3.53359e-11	1.30771e-09
ugt-51	1.31686	0.382394	0.00057375	0.00576726
ZK909.3	1.31636	0.165276	1.65693e-15	9.13736e-14
hsp-12.3	1.31545	0.344972	0.000137175	0.00168771
W01F3.2	1.3151	0.115269	3.77234e-30	4.2445e-28
F59B1.8	1.30711	0.249468	1.60923e-07	3.72338e-06
F47E1.2	1.30609	0.468122	0.00526985	0.0346
col-154	1.30459	0.15941	2.74829e-16	1.56507e-14
F56H11.2	1.30248	0.415833	0.00173497	0.0141889
R03H10.1	1.30148	0.302744	1.71614e-05	0.000269332
Y69H2.10	1.29847	0.462276	0.00497167	0.0330939
Y66D12A.13	1.29636	0.208112	4.68964e-10	1.54316e-08
Y47D9A.3	1.2962	0.397509	0.00111096	0.00983584
C44E12.1	1.29161	0.341059	0.000152448	0.00185598
T27E4.7	1.28765	0.267348	1.46197e-06	2.86078e-05
Y57A10A.14	1.28659	0.386462	0.000871101	0.0081295
dpy-6	1.28225	0.304831	2.59425e-05	0.000391297
F32A5.4	1.28198	0.111565	1.46555e-30	1.67602e-28
fozi-1	1.27697	0.269937	2.23829e-06	4.2488e-05
cutl-23	1.27407	0.393667	0.00121037	0.0105281
skr-3	1.27014	0.121844	1.92075e-25	1.78655e-23
F25E5.4	1.26805	0.326711	0.000103922	0.00131931
T06E4.12	1.26498	0.417453	0.00244368	0.0187125
linc-82	1.26371	0.408024	0.00195395	0.0156406
Y39D8A.1	1.25819	0.288567	1.29987e-05	0.000209662
nspb-6	1.25766	0.443908	0.00460901	0.0310352
R07B1.8	1.25716	0.433973	0.00376917	0.0264259
W02H3.1	1.2564	0.25675	9.90738e-07	2.0033e-05
pqn-60	1.25514	0.208864	1.8624e-09	5.62428e-08
col-162	1.25418	0.194757	1.19677e-10	4.14324e-09
F20D6.8	1.25187	0.431893	0.0037487	0.0263229
B0416.7	1.25101	0.235488	1.08186e-07	2.60243e-06
F14H3.12	1.24934	0.43188	0.00381822	0.0267563
T22F7.1	1.24876	0.218997	1.18293e-08	3.29427e-07
asp-13	1.24838	0.0690622	4.90584e-73	2.07413e-70
T25B9.2	1.248	0.466015	0.00740582	0.0450222
T27F6.8	1.24766	0.258398	1.37605e-06	2.70404e-05
Y48A6B.7	1.24646	0.446295	0.0052237	0.0343401
prk-2	1.23804	0.180903	7.71945e-12	3.08601e-10
kqt-3	1.23677	0.271867	5.38532e-06	9.35596e-05
fbxa-37	1.2362	0.410006	0.0025692	0.0194179
F26F12.3	1.23366	0.107578	1.91916e-30	2.17692e-28
tbb-6	1.23307	0.346354	0.000370645	0.00396872
rol-8	1.23089	0.35983	0.000624456	0.00619659
Y42A5A.3	1.22928	0.344276	0.000356112	0.0038426
Y51A2D.13	1.22878	0.110551	1.06015e-28	1.10382e-26
cbp-2	1.2249	0.238298	2.74463e-07	6.15644e-06
M163.1	1.22466	0.174047	1.97272e-12	8.52117e-11
nhr-202	1.2233	0.410537	0.00288488	0.0213981
F53F1.4	1.22209	0.370095	0.00095961	0.00874658
lgc-22	1.21935	0.164044	1.06077e-13	5.17479e-12
nhr-58	1.21786	0.366749	0.000897992	0.00829171
col-130	1.2148	0.22728	9.04396e-08	2.20212e-06
ptr-12	1.21469	0.254261	1.77643e-06	3.42084e-05
F25E5.5	1.21299	0.256747	2.30744e-06	4.36817e-05
C04C11.1	1.20854	0.359815	0.000782867	0.00742526
tyr-6	1.20749	0.156526	1.21662e-14	6.40539e-13
W05H9.1	1.20603	0.101424	1.31752e-32	1.70204e-30
endu-2	1.2058	0.0779361	5.3906e-54	1.56687e-51
T03E6.8	1.20496	0.344456	0.000468472	0.00487044
Y71F9B.9	1.20314	0.338703	0.00038202	0.00408738
acox-1.3	1.20232	0.294282	4.39644e-05	0.000625527
C05D12.7	1.20083	0.352326	0.000653688	0.00641819
E03A3.1	1.19994	0.422013	0.00446393	0.0302775
E04F6.8	1.19892	0.178119	1.68483e-11	6.45791e-10
nhr-44	1.19875	0.441823	0.00666382	0.0414522
ZK250.13	1.19774	0.385586	0.0018945	0.0152875
twk-34	1.19683	0.156569	2.10487e-14	1.09172e-12
btb-16	1.19532	0.427115	0.00513267	0.0338746
T27D12.1	1.19257	0.101037	3.75293e-32	4.71719e-30
ZK593.3	1.19164	0.146283	3.75683e-16	2.12207e-14
pqm-1	1.18731	0.122295	2.77174e-22	2.22249e-20
cnc-10	1.18692	0.336609	0.000421722	0.00443062
best-7	1.18673	0.157085	4.19721e-14	2.16087e-12
F08B12.4	1.18116	0.143072	1.5104e-16	8.78043e-15
tyr-1	1.17999	0.129539	8.30367e-20	5.91086e-18
clec-10	1.17122	0.100821	3.38749e-31	3.93853e-29
M04C3.1	1.16946	0.187433	4.39284e-10	1.44891e-08
C01B4.7	1.16792	0.273668	1.97545e-05	0.000306239
Y19D10A.4	1.16792	0.273668	1.97545e-05	0.000306239
F09F7.6	1.16585	0.386404	0.00255135	0.0193249
R08F11.4	1.16271	0.406945	0.00427429	0.0292711
T26C5.4	1.16079	0.362916	0.00138139	0.0117233
K09F5.6	1.16066	0.394731	0.00327799	0.0237582
best-12	1.15992	0.34239	0.000704746	0.00680458
abu-6	1.15903	0.413671	0.0050817	0.0336018
ugt-54	1.15586	0.275663	2.75267e-05	0.000411632
F15E6.3	1.15477	0.35104	0.00100341	0.00904368
slc-25A29	1.14764	0.377171	0.00234417	0.0181196
pqn-72	1.14374	0.155928	2.21613e-13	1.06252e-11
Y4C6B.2	1.14329	0.23222	8.50884e-07	1.73307e-05
ZK546.7	1.13768	0.329274	0.000550065	0.00556
Y42G9A.1	1.1369	0.337922	0.00076716	0.00731108
Y43C5A.3	1.13608	0.152267	8.57731e-14	4.24364e-12
tps-1	1.13346	0.141615	1.20633e-15	6.73228e-14
C05E7.1	1.13242	0.407765	0.00548384	0.0356029
nas-11	1.13063	0.0869543	1.18284e-38	2.06287e-36
let-653	1.13031	0.275876	4.18264e-05	0.00059914
dhc-4	1.12705	0.252467	8.03797e-06	0.000134791
K12C11.6	1.12515	0.391991	0.00410015	0.0283339
hmbx-1	1.12343	0.258636	1.40116e-05	0.000225219
C23H4.8	1.12127	0.382592	0.0033818	0.024271
C13C4.6	1.12075	0.400746	0.00516336	0.034045
F54C9.3	1.1192	0.24022	3.1768e-06	5.86279e-05
nas-7	1.11864	0.21632	2.32558e-07	5.26729e-06
acs-22	1.1172	0.128658	3.8369e-18	2.48988e-16
F52E1.14	1.1158	0.0802938	6.65748e-44	1.52271e-41
F26A10.2	1.11404	0.394594	0.00475404	0.0318427
Y105C5B.15	1.11308	0.0955664	2.37284e-31	2.782e-29
ZK783.6	1.11038	0.416908	0.00773625	0.0466852
E03H4.8	1.10951	0.227065	1.02755e-06	2.07473e-05
Y59H11AM.4	1.10585	0.360111	0.00213447	0.016839
C06H2.7	1.10121	0.269549	4.40065e-05	0.000625527
sulp-4	1.09775	0.276102	7.01119e-05	0.000938773
zipt-2.1	1.09539	0.157871	3.96326e-12	1.66552e-10
ZK1290.14	1.09523	0.307575	0.000369655	0.00396235
spp-23	1.09432	0.181566	1.66913e-09	5.09577e-08
F52E10.4	1.09322	0.334647	0.00108776	0.00966648
tsp-19	1.09171	0.408656	0.00755181	0.0458298
ttc-36	1.08725	0.137937	3.21742e-15	1.75349e-13
flr-4	1.08696	0.364896	0.00289367	0.0214291
Y54G2A.36	1.0859	0.307525	0.000413822	0.00436406
F56C11.6	1.08305	0.293006	0.000218716	0.00253659
lys-8	1.08225	0.0745856	1.045e-47	2.69996e-45
C33D9.3	1.07839	0.184738	5.30149e-09	1.52823e-07
ugt-26	1.07749	0.0918562	8.92591e-32	1.08291e-29
clec-84	1.0764	0.150652	9.00339e-13	4.03908e-11
F55B11.4	1.07513	0.15608	5.64644e-12	2.31024e-10
H06A10.1	1.07378	0.174831	8.16062e-10	2.6114e-08
amt-1	1.07196	0.254874	2.60128e-05	0.000391933
fipr-3	1.07053	0.405941	0.00836061	0.0494059
F53A9.6	1.06736	0.288397	0.000214756	0.00250315
C09F12.2	1.06504	0.312428	0.000652194	0.00640804
T06E4.5	1.06155	0.392658	0.00686118	0.042245
cah-3	1.06126	0.0966131	4.52965e-28	4.64688e-26
ZK673.1	1.06113	0.168076	2.72955e-10	9.17654e-09
dcar-1	1.05761	0.115459	5.18857e-20	3.73149e-18
C35C5.8	1.05755	0.283619	0.000192417	0.00226549
sqt-3	1.05283	0.236291	8.36504e-06	0.000139271
ikb-1	1.05169	0.225931	3.24111e-06	5.9657e-05
C28G1.10	1.05096	0.38115	0.00582756	0.0373306
Y32F6B.1	1.04249	0.160042	7.32467e-11	2.61365e-09
zipt-16	1.04174	0.276528	0.000165091	0.00198394
C06B3.6	1.04143	0.142852	3.09288e-13	1.45784e-11
far-7	1.04106	0.367156	0.00457589	0.0308569
col-13	1.04024	0.125283	1.01427e-16	5.97092e-15
Y38H8A.2	1.03942	0.342847	0.00243153	0.0186297
M153.1	1.0389	0.383704	0.00677802	0.0419148
clec-62	1.03828	0.156849	3.60182e-11	1.32592e-09
col-186	1.03738	0.223356	3.40854e-06	6.24095e-05
F38E9.1	1.03674	0.150683	5.97529e-12	2.42347e-10
nhr-97	1.03275	0.0987317	1.31683e-25	1.23305e-23
T14A8.2	1.03015	0.386131	0.00763325	0.0462436
hic-1	1.02902	0.379648	0.00671874	0.0417178
C54D10.10	1.02818	0.293077	0.000451096	0.0047003
C39E9.8	1.02663	0.0961474	1.29506e-26	1.25477e-24
col-76	1.02609	0.210826	1.13309e-06	2.26488e-05
kin-15	1.02151	0.185303	3.53449e-08	9.20023e-07
col-150	1.02069	0.16259	3.43642e-10	1.14976e-08
ugt-24	1.01846	0.332216	0.00217195	0.0170718
W02D9.10	1.01628	0.183401	3.00182e-08	7.91708e-07
T10E9.3	1.01482	0.277268	0.000252165	0.00288552
col-168	1.01169	0.159201	2.08738e-10	7.08271e-09
bus-19	1.01163	0.332886	0.00237388	0.0182682
ttr-18	1.0092	0.0859876	8.27911e-32	1.01325e-29
cnp-3	1.0073	0.19768	3.47556e-07	7.52966e-06
ZK596.1	1.00667	0.202595	6.73331e-07	1.40423e-05
F10D11.6	1.00636	0.181977	3.2003e-08	8.39297e-07
ZC443.3	1.00591	0.220794	5.21704e-06	9.12694e-05
F48E3.2	1.00054	0.335658	0.00287462	0.0213447
col-10	0.999837	0.110999	2.10565e-19	1.45436e-17
F52E1.9	0.99922	0.347688	0.00405444	0.0280839
abu-7	0.994263	0.326962	0.00235859	0.0181818
osm-7	0.993515	0.136727	3.69178e-13	1.73427e-11
ZK550.6	0.993188	0.166094	2.23597e-09	6.72332e-08
ugt-17	0.992256	0.177412	2.23238e-08	6.01276e-07
F13D12.3	0.990393	0.145679	1.05749e-11	4.16783e-10
hsp-43	0.988289	0.0813251	5.57588e-34	7.77947e-32
col-144	0.987985	0.127562	9.54925e-15	5.06582e-13
spp-1	0.985198	0.199722	8.10352e-07	1.66021e-05
W04A8.4	0.983956	0.353324	0.00535523	0.0349631
F01D5.1	0.983912	0.186365	1.2954e-07	3.05811e-06
bcc-1	0.983225	0.295476	0.000876	0.0081643
M02D8.6	0.982924	0.267614	0.000239795	0.00275814
F58A6.1	0.981975	0.263677	0.000195969	0.00230342
Y17G7B.8	0.981282	0.214195	4.62186e-06	8.19366e-05
B0238.12	0.976591	0.356068	0.00609343	0.0386083
B0393.4	0.974888	0.25616	0.000141357	0.00173763
abf-5	0.972589	0.301516	0.00125682	0.0108355
glc-1	0.97162	0.266615	0.000268145	0.00303912
T20B3.1	0.971239	0.299204	0.00117007	0.0102521
nlp-31	0.969094	0.330595	0.00337474	0.0242453
col-161	0.968994	0.33307	0.00362258	0.0256429
Y48A6B.9	0.968611	0.246477	8.5011e-05	0.00110641
ptr-8	0.966993	0.14773	5.92262e-11	2.1352e-09
C02D5.4	0.964353	0.118113	3.22295e-16	1.82791e-14
fmo-4	0.9639	0.116581	1.36141e-16	7.98081e-15
C25E10.8	0.959965	0.234983	4.40272e-05	0.000625527
C06G1.1	0.957983	0.274576	0.000484912	0.00501148
E04F6.6	0.957005	0.156602	9.89713e-10	3.13829e-08
ZK849.1	0.957001	0.332663	0.00401747	0.0278865
Y54G2A.45	0.955751	0.233612	4.29164e-05	0.000614123
K12D12.4	0.95551	0.349972	0.00632867	0.0398455
C46H11.2	0.949516	0.255506	0.00020223	0.00236704
C06E7.4	0.948686	0.31395	0.00251299	0.0190966
col-39	0.947366	0.126537	7.05293e-14	3.52697e-12
nhr-53	0.946818	0.342087	0.00564417	0.0364235
T20D4.11	0.946196	0.337201	0.00501555	0.0333065
lys-1	0.944775	0.0798059	2.47114e-32	3.16306e-30
Y54E2A.9	0.943961	0.174221	6.02069e-08	1.51067e-06
T10B10.8	0.943957	0.295395	0.00139553	0.0118074
tir-1	0.943799	0.155836	1.39225e-09	4.33586e-08
F01D5.5	0.943435	0.193987	1.15385e-06	2.30309e-05
Y44A6C.1	0.939594	0.175236	8.23542e-08	2.0229e-06
acd-5	0.938173	0.250429	0.000179484	0.00213848
R06C1.6	0.936678	0.265574	0.000420316	0.00442919
pgph-3	0.936465	0.0946986	4.65123e-23	3.90927e-21
clec-49	0.93634	0.139241	1.76058e-11	6.72977e-10
sulp-8	0.936161	0.239476	9.26005e-05	0.00119295
Y37A1A.3	0.934882	0.229967	4.79747e-05	0.000675082
hil-3	0.933083	0.329375	0.00461289	0.0310463
T22C8.6	0.932339	0.258808	0.000315241	0.00347139
clec-173	0.930645	0.204143	5.14508e-06	9.02945e-05
npa-1	0.92846	0.0954454	2.29844e-22	1.85363e-20
flp-7	0.926591	0.330554	0.00506071	0.0335266
F44A2.3	0.926137	0.227015	4.51088e-05	0.000640242
R06A10.4	0.922903	0.25357	0.000273022	0.00308188
E01G4.5	0.920967	0.333728	0.00578662	0.0371366
hrg-1	0.920103	0.322968	0.00438706	0.0298286
glo-3	0.91886	0.314257	0.00345663	0.0246937
fipr-6	0.918372	0.296091	0.00192441	0.0154518
alh-4	0.916242	0.0717531	2.4311e-37	4.03795e-35
rgs-7	0.913493	0.178038	2.88375e-07	6.40669e-06
M05B5.3	0.912186	0.26085	0.000470573	0.00488754
cyp-32A1	0.911115	0.262432	0.000516949	0.00527227
cyp-35A2	0.911111	0.316543	0.003998	0.0277689
W01B11.6	0.910432	0.122013	8.53712e-14	4.23879e-12
F42G4.5	0.906147	0.152683	2.94162e-09	8.7137e-08
hlh-33	0.905197	0.300069	0.00255601	0.0193393
zip-2	0.904832	0.0835042	2.33009e-27	2.33881e-25
col-125	0.904225	0.130399	4.08311e-12	1.70053e-10
col-3	0.902563	0.0875331	6.27725e-25	5.68702e-23
C15A11.4	0.902183	0.260489	0.000533346	0.00541182
43252	0.901663	0.149108	1.47512e-09	4.55328e-08
T08B6.9	0.900586	0.132726	1.15834e-11	4.53966e-10
F56D3.1	0.900299	0.316759	0.00448009	0.0303576
ctl-3	0.893557	0.195793	5.02422e-06	8.83958e-05
nspb-2	0.8928	0.311136	0.00411146	0.0283695
Y73F4A.3	0.892454	0.197577	6.27228e-06	0.000107905
jmjd-3.1	0.891816	0.205302	1.39965e-05	0.000225219
ztf-22	0.890712	0.169234	1.41584e-07	3.31439e-06
F13D12.8	0.887908	0.337236	0.00846611	0.0499025
K06A9.2	0.88626	0.33463	0.00808547	0.0483327
F59B1.2	0.881501	0.130405	1.3825e-11	5.33145e-10
clec-5	0.881261	0.125785	2.45053e-12	1.05199e-10
C14C6.5	0.875571	0.121685	6.22906e-13	2.82168e-11
R10H1.1	0.874158	0.29285	0.00283574	0.0210917
mef-2	0.873976	0.134424	7.94617e-11	2.82099e-09
C38C3.8	0.868491	0.298008	0.00356459	0.0252966
T28F3.8	0.867496	0.131776	4.60711e-11	1.67392e-09
C48E7.1	0.863488	0.079496	1.74817e-27	1.76742e-25
M7.12	0.862366	0.305672	0.00478426	0.0320144
nlp-59	0.860026	0.261297	0.000996993	0.00899744
F17C11.11	0.859685	0.129577	3.25535e-11	1.21766e-09
C25E10.5	0.859236	0.192307	7.89379e-06	0.000132692
Y50D4B.1	0.859158	0.221778	0.00010708	0.00135456
T07F12.4	0.854603	0.25663	0.000868149	0.0081084
ttr-33	0.854187	0.185288	4.02593e-06	7.24771e-05
nlp-37	0.853105	0.314213	0.00662653	0.0413359
nlp-8	0.852704	0.312892	0.00642564	0.0403286
F43C11.7	0.849255	0.264781	0.00133948	0.0114583
sod-4	0.848947	0.212075	6.25312e-05	0.000849498
F13H6.3	0.846602	0.16311	2.09882e-07	4.80044e-06
F14H12.3	0.846531	0.263755	0.0013295	0.0113799
wago-10	0.843791	0.231724	0.00027119	0.00306616
acox-1.6	0.842573	0.182884	4.08232e-06	7.33976e-05
nhr-156	0.841451	0.278634	0.00252848	0.0192038
ttr-17	0.841449	0.145999	8.2448e-09	2.34758e-07
col-98	0.840611	0.292872	0.00410175	0.0283339
Y45G5AM.3	0.840522	0.183905	4.86761e-06	8.5857e-05
vap-2	0.839072	0.109029	1.40509e-14	7.34227e-13
C45G9.4	0.838267	0.259839	0.00125489	0.0108276
dhs-21	0.83783	0.126714	3.79177e-11	1.38852e-09
feh-1	0.837449	0.197491	2.2309e-05	0.000340914
M60.4	0.837412	0.123884	1.3833e-11	5.33145e-10
nac-2	0.837127	0.304345	0.00594897	0.0379535
pho-11	0.83696	0.0885364	3.28376e-21	2.51731e-19
spe-49	0.836518	0.294575	0.004515	0.0305793
pbo-1	0.834771	0.137167	1.15924e-09	3.65095e-08
K10D6.2	0.834364	0.23517	0.000388287	0.00413061
Y4C6A.1	0.833682	0.270265	0.0020377	0.0161902
Y37D8A.16	0.833556	0.205656	5.05305e-05	0.000706414
fipr-8	0.832466	0.31269	0.00776147	0.0467565
C16D9.4	0.831861	0.302678	0.00598981	0.0381597
T10G3.3	0.831468	0.162922	3.33496e-07	7.25886e-06
acox-3	0.8299	0.152118	4.88012e-08	1.23795e-06
F45E1.1	0.826566	0.294442	0.00499695	0.0332146
B0524.2	0.82566	0.311398	0.00801439	0.0480519
srj-14	0.825409	0.276571	0.00284105	0.0211067
M04D5.3	0.824363	0.299001	0.00583239	0.0373444
C17F4.7	0.820891	0.0668124	1.07026e-34	1.55544e-32
F53C11.3	0.819644	0.123862	3.65641e-11	1.34248e-09
F28H1.1	0.81676	0.268321	0.00233481	0.0180702
nep-23	0.8162	0.192156	2.16072e-05	0.000332008
spl-2	0.814836	0.260464	0.00175763	0.0143658
C44H9.5	0.814615	0.269017	0.00246085	0.0187971
Y57G11A.4	0.812729	0.153832	1.26941e-07	3.00183e-06
T16A9.3	0.811179	0.243836	0.000878691	0.00818391
tpra-1	0.808713	0.176505	4.60957e-06	8.18786e-05
abf-6	0.806678	0.215365	0.000179935	0.0021407
gtl-2	0.806671	0.236717	0.000655011	0.00642215
F37B12.1	0.805926	0.266931	0.00253414	0.019227
phat-3	0.805896	0.243349	0.000927336	0.00851197
Y51A2D.21	0.803563	0.275794	0.00357244	0.0253395
ttr-44	0.801734	0.221745	0.000299687	0.00331581
ugt-66	0.800915	0.251332	0.00143918	0.0121033
nhr-41	0.798994	0.248903	0.00132705	0.0113658
F55G11.4	0.798603	0.157741	4.13235e-07	8.857e-06
pgp-10	0.797528	0.252383	0.00157775	0.0130991
kqt-2	0.797286	0.214415	0.000200468	0.00234839
crh-1	0.796095	0.17232	3.83993e-06	6.94874e-05
tag-260	0.795297	0.129971	9.41305e-10	2.99159e-08
sqst-1	0.793902	0.127521	4.79499e-10	1.57411e-08
F56D5.6	0.792911	0.148506	9.33354e-08	2.26079e-06
nep-1	0.791669	0.192794	4.02065e-05	0.000578171
clec-186	0.788776	0.110604	9.92475e-13	4.40988e-11
T19C4.5	0.787466	0.294789	0.00755605	0.0458357
aex-5	0.786921	0.165399	1.95812e-06	3.75786e-05
nhr-117	0.786831	0.283148	0.00545485	0.0354642
F31F7.1	0.786766	0.0935239	4.01491e-17	2.40412e-15
mlk-1	0.7846	0.160643	1.03893e-06	2.08564e-05
DH11.2	0.784551	0.131945	2.7471e-09	8.15481e-08
nkb-3	0.781902	0.0795864	8.82425e-23	7.37221e-21
Y42G9A.3	0.781372	0.147392	1.14962e-07	2.73711e-06
coel-1	0.781165	0.228975	0.000645903	0.00636416
sbp-1	0.779017	0.110116	1.50001e-12	6.56052e-11
T23B3.2	0.778669	0.173612	7.28776e-06	0.000123098
lec-8	0.772783	0.119354	9.50052e-11	3.34725e-09
B0303.11	0.772752	0.104138	1.16726e-13	5.67445e-12
lec-11	0.772725	0.188373	4.09404e-05	0.000587051
cdf-2	0.772213	0.280203	0.00585292	0.0374587
asah-1	0.765767	0.106601	6.79476e-13	3.06798e-11
C53D6.7	0.762904	0.149462	3.31942e-07	7.23634e-06
Y116F11B.8	0.761807	0.274956	0.00559438	0.0361523
F42G4.6	0.760165	0.15422	8.26085e-07	1.68502e-05
T16G1.6	0.759695	0.273754	0.00551852	0.0358022
C02F12.5	0.759245	0.209254	0.000285255	0.00318901
F43G6.4	0.759207	0.207394	0.000251531	0.00288124
E04F6.9	0.758122	0.16322	3.40443e-06	6.24095e-05
brp-1	0.757273	0.0666126	6.01405e-30	6.71264e-28
toh-1	0.757192	0.147575	2.88374e-07	6.40669e-06
hpo-15	0.756866	0.0861762	1.59494e-18	1.03984e-16
F27E5.3	0.755583	0.257026	0.00328516	0.0237781
col-42	0.755545	0.273393	0.00571709	0.0368259
Y53G8B.1	0.753388	0.261205	0.00392305	0.0273535
F59E11.5	0.752433	0.139592	7.03692e-08	1.75007e-06
Y43F8C.3	0.752304	0.256918	0.00340947	0.0244366
mua-6	0.751768	0.0777327	3.99688e-22	3.15054e-20
phat-4	0.751479	0.124763	1.70938e-09	5.20726e-08
D2030.2	0.749428	0.0940301	1.58561e-15	8.77872e-14
cysl-1	0.748897	0.117601	1.91325e-10	6.52658e-09
W08E3.4	0.748424	0.262675	0.00438239	0.0298114
gba-1	0.747978	0.174772	1.87111e-05	0.000291358
F46F2.3	0.747094	0.157663	2.15241e-06	4.10813e-05
Y75B8A.3	0.745738	0.226883	0.00101303	0.00911856
T01D3.6	0.745542	0.082236	1.236e-19	8.62231e-18
ZK973.8	0.74551	0.221464	0.000761902	0.00726593
npr-28	0.743638	0.262117	0.00455333	0.0307344
nhx-9	0.743445	0.184593	5.63791e-05	0.000775741
nhr-3	0.7425	0.234989	0.00157918	0.0130991
srsx-34	0.741396	0.177017	2.81092e-05	0.000418547
maoc-1	0.74012	0.141729	1.76916e-07	4.07989e-06
spp-2	0.739993	0.273285	0.00677372	0.0419148
clec-80	0.73957	0.176189	2.69773e-05	0.000404718
rhr-1	0.739434	0.0665831	1.18051e-28	1.22003e-26
dct-1	0.739058	0.222173	0.000879454	0.0081851
F36H9.4	0.739003	0.229992	0.0013128	0.0112561
F49B2.6	0.738431	0.257526	0.00413858	0.0285284
dml-1	0.737113	0.279478	0.00835296	0.0493816
C30F2.3	0.736802	0.193738	0.000142907	0.00175513
C05C8.7	0.733964	0.108541	1.36017e-11	5.28608e-10
col-95	0.73388	0.177283	3.47936e-05	0.000507782
tre-3	0.73365	0.146494	5.49814e-07	1.15876e-05
K10D11.5	0.732832	0.163102	7.01925e-06	0.000118984
T10H9.8	0.732336	0.270082	0.00669724	0.0416213
F20D1.3	0.730021	0.0860494	2.18067e-17	1.3403e-15
ttr-59	0.727248	0.100417	4.41258e-13	2.05215e-11
asp-12	0.726741	0.153164	2.08645e-06	3.98769e-05
acs-20	0.724351	0.238496	0.00238817	0.0183479
Y51H4A.24	0.722579	0.178533	5.18096e-05	0.000720686
C05D10.4	0.721141	0.154133	2.88719e-06	5.3853e-05
timp-1	0.72018	0.196117	0.000240468	0.0027636
Y37E11AM.3	0.719631	0.104755	6.43553e-12	2.60257e-10
drd-5	0.719211	0.170453	2.44928e-05	0.000371843
aex-1	0.718674	0.264307	0.00654619	0.0409876
hda-5	0.717683	0.240887	0.00288878	0.0214055
ubc-8	0.717407	0.221742	0.00121503	0.0105489
Y53F4B.45	0.716228	0.16642	1.67943e-05	0.000263867
ace-1	0.714196	0.230009	0.00190229	0.0153238
camt-1	0.713885	0.11838	1.63489e-09	5.01317e-08
tyr-4	0.7132	0.0772954	2.78478e-20	2.0449e-18
droe-4	0.713123	0.269928	0.0082443	0.0489465
C49C3.9	0.712656	0.164604	1.49443e-05	0.000238562
fipr-4	0.71181	0.262191	0.00663053	0.0413359
spp-18	0.707621	0.229642	0.00206022	0.0163412
C49A9.3	0.707292	0.208902	0.000709814	0.00683932
C01C4.3	0.706325	0.200307	0.000421535	0.00443062
H20E11.1	0.706318	0.227524	0.00190691	0.0153521
C34D10.2	0.705985	0.139478	4.15725e-07	8.88238e-06
hpo-28	0.705211	0.213378	0.000949809	0.00870107
W03D8.10	0.704484	0.209614	0.000777011	0.00737976
C18D11.1	0.701674	0.134916	1.9843e-07	4.55343e-06
cebp-1	0.701483	0.24002	0.00347115	0.0247848
ugt-44	0.700501	0.177847	8.18997e-05	0.00107192
lips-17	0.69945	0.205265	0.000655495	0.00642238
Y37A1A.2	0.697312	0.176326	7.66418e-05	0.00101069
ZK822.2	0.696554	0.145808	1.7776e-06	3.42084e-05
asp-6	0.694572	0.0633642	5.84598e-28	5.95351e-26
43161	0.693846	0.262858	0.00829978	0.0491585
F17C11.12	0.693355	0.222258	0.00181099	0.0146901
F18H3.4	0.693083	0.208047	0.000864166	0.00809727
F53C3.1	0.689781	0.250725	0.00593878	0.0379212
soc-2	0.689369	0.133864	2.60775e-07	5.85883e-06
oac-46	0.689038	0.141074	1.03834e-06	2.08564e-05
Y38H8A.3	0.687689	0.122763	2.1219e-08	5.73736e-07
fipr-7	0.685755	0.241655	0.00454339	0.0307023
C17H12.8	0.685274	0.112728	1.20929e-09	3.79895e-08
abt-5	0.685152	0.209841	0.00109423	0.00971781
H06I04.5	0.683051	0.189667	0.000316612	0.003478
irg-5	0.683041	0.236608	0.00389179	0.0271627
R07C12.2	0.681769	0.192532	0.000398517	0.0042218
F22B8.7	0.680063	0.149508	5.39878e-06	9.35699e-05
pqn-31	0.679884	0.123813	3.99193e-08	1.02546e-06
T02E1.7	0.678682	0.167349	5.00308e-05	0.000700131
tth-1	0.678128	0.189075	0.000335066	0.0036518
ivns-1	0.676851	0.0736902	4.11192e-20	3.00364e-18
klu-2	0.676304	0.238635	0.00459611	0.0309633
plc-2	0.675895	0.207651	0.00113411	0.0100083
ZC376.3	0.672319	0.254383	0.0082191	0.0488593
zip-12	0.669502	0.152236	1.09357e-05	0.00017845
W03F8.2	0.667957	0.253103	0.00831341	0.0492103
T28F4.5	0.667842	0.0829548	8.23437e-16	4.61389e-14
Y37A1B.5	0.666557	0.0812347	2.29983e-16	1.31505e-14
Y39G10AR.11	0.665341	0.120876	3.70591e-08	9.59275e-07
irg-4	0.664657	0.140816	2.35807e-06	4.45115e-05
icmt-1	0.664003	0.207338	0.00136237	0.0116256
C50A2.3	0.663115	0.246921	0.00724152	0.0441388
C50F4.1	0.662	0.144964	4.95558e-06	8.72984e-05
abts-4	0.660572	0.14657	6.5791e-06	0.000112905
F35E12.6	0.660235	0.117034	1.6869e-08	4.61484e-07
sym-1	0.658102	0.230718	0.00433897	0.0295592
Y1A5A.1	0.657254	0.186651	0.000429443	0.00448808
rcan-1	0.657144	0.150673	1.29233e-05	0.000208688
fshr-1	0.65643	0.139643	2.59196e-06	4.86716e-05
sup-26	0.65549	0.129068	3.80118e-07	8.19691e-06
wht-4	0.655371	0.217425	0.00257628	0.0194609
Y65B4A.9	0.654438	0.188852	0.000529549	0.00538111
C05C12.4	0.654114	0.160907	4.7999e-05	0.000675082
F57H12.5	0.651461	0.195185	0.000844845	0.00794827
cnp-2	0.649245	0.123781	1.56201e-07	3.62615e-06
ZK1073.1	0.648258	0.117513	3.45826e-08	9.03551e-07
ttr-8	0.647054	0.164621	8.47474e-05	0.00110504
nlp-16	0.647038	0.200559	0.00125456	0.0108276
T05A7.1	0.644436	0.155078	3.24498e-05	0.000476066
doxa-1	0.643802	0.182259	0.000411875	0.00434681
F10D7.3	0.643342	0.226583	0.00452104	0.0306053
T21C9.6	0.641873	0.154829	3.38801e-05	0.000495488
cpr-3	0.641496	0.226004	0.00453368	0.0306612
T07A5.1	0.640251	0.147969	1.51205e-05	0.000240397
col-12	0.639999	0.129602	7.88526e-07	1.62025e-05
fbxa-156	0.638969	0.231178	0.00571021	0.0367985
endu-1	0.638598	0.151665	2.54702e-05	0.000384589
pho-7	0.637284	0.175411	0.000280038	0.00314328
ttr-21	0.635569	0.234749	0.00678051	0.0419148
Y49E10.10	0.633464	0.144093	1.10152e-05	0.000179329
pqn-75	0.632958	0.169643	0.000190634	0.0022521
W02D7.4	0.631565	0.215187	0.00333584	0.0240153
ZC581.7	0.630883	0.182582	0.000549582	0.00556
atg-2	0.630701	0.134073	2.54928e-06	4.79347e-05
fkh-7	0.629482	0.186515	0.000738266	0.00708411
ZK6.11	0.628116	0.0745804	3.70101e-17	2.23535e-15
F43G6.8	0.627781	0.23539	0.00765352	0.0463262
Y8A9A.2	0.627682	0.211148	0.00295187	0.0217907
F17H10.2	0.627467	0.12684	7.53968e-07	1.55382e-05
clec-63	0.626626	0.067575	1.80903e-20	1.34971e-18
C36F7.5	0.626512	0.160223	9.21972e-05	0.00118885
R01H2.2	0.624501	0.231519	0.00698807	0.0428372
amx-2	0.624467	0.134118	3.22243e-06	5.93915e-05
vpat-1	0.624041	0.163331	0.000133063	0.00164292
F13D2.1	0.623903	0.189041	0.000965636	0.00878836
clec-119	0.623233	0.154598	5.54694e-05	0.000763977
clec-83	0.622814	0.118048	1.32083e-07	3.11288e-06
fbxa-60	0.622802	0.194621	0.00137393	0.0116912
R05D7.5	0.622295	0.18247	0.000648675	0.00638568
mop-25.1	0.62065	0.0961415	1.078e-10	3.76005e-09
ttr-34	0.619407	0.133295	3.36976e-06	6.18617e-05
spe-6	0.617024	0.147152	2.75141e-05	0.000411632
dgat-2	0.616971	0.185863	0.000901823	0.00832158
C15H9.11	0.613387	0.225999	0.00664527	0.0413721
F18G5.6	0.612763	0.147413	3.22758e-05	0.000474214
yap-1	0.610795	0.146627	3.10495e-05	0.000457931
skr-4	0.610532	0.210167	0.00367268	0.0258794
faah-2	0.609269	0.117655	2.23742e-07	5.09241e-06
abts-1	0.607369	0.0916447	3.41593e-11	1.27431e-09
igcm-3	0.606075	0.15224	6.861e-05	0.000921316
rop-1	0.604706	0.0895371	1.44129e-11	5.53964e-10
plc-3	0.603751	0.144178	2.82002e-05	0.000419009
acy-4	0.603224	0.207501	0.00364805	0.0257448
col-166	0.602666	0.219819	0.0061133	0.0387057
flp-24	0.601535	0.159132	0.000156761	0.00189522
ZK550.2	0.601101	0.145924	3.8006e-05	0.000550062
lgg-2	0.59897	0.0956204	3.75128e-10	1.24911e-08
sma-5	0.59816	0.151908	8.22864e-05	0.00107496
col-34	0.596125	0.198379	0.00265593	0.0199438
aakg-4	0.594698	0.201893	0.00322315	0.0234094
M117.4	0.593493	0.183684	0.00123332	0.0106745
snf-11	0.592043	0.190453	0.00187972	0.0151858
fbxl-1	0.591723	0.135649	1.2878e-05	0.000208197
M05D6.1	0.591472	0.203943	0.0037294	0.0262261
spp-10	0.589993	0.0999261	3.54172e-09	1.03811e-07
B0334.3	0.589725	0.0785391	5.97247e-14	3.04117e-12
Y37E11AM.4	0.587484	0.157361	0.000188954	0.00223604
irld-8	0.585819	0.217675	0.00711849	0.0435411
asm-1	0.585723	0.214249	0.00625992	0.0395018
ifb-2	0.5856	0.0674469	3.87561e-18	2.50336e-16
acs-17	0.583818	0.109954	1.09837e-07	2.63308e-06
lgg-1	0.583814	0.0700368	7.69618e-17	4.54987e-15
acdh-10	0.582904	0.127225	4.61271e-06	8.18786e-05
gpdh-2	0.581503	0.0920284	2.63718e-10	8.88743e-09
tag-344	0.581225	0.209624	0.00555931	0.036009
F54D5.3	0.58103	0.107243	6.03097e-08	1.51067e-06
T16G1.7	0.580817	0.216608	0.007331	0.0446062
R13H9.5	0.580702	0.155188	0.000182626	0.00216851
B0304.4	0.579833	0.200559	0.00383907	0.0268619
D1081.5	0.578909	0.17299	0.000818442	0.00773638
Y57G11C.36	0.578297	0.157223	0.000234884	0.00270835
M05B5.4	0.574649	0.165565	0.000518823	0.00528753
dhrs-4	0.574012	0.184602	0.00187429	0.0151507
dod-23	0.573922	0.132643	1.51282e-05	0.000240397
inx-7	0.57382	0.177618	0.00123515	0.0106837
pgph-2	0.573595	0.140804	4.62684e-05	0.000654039
H01G02.1	0.572608	0.122781	3.10649e-06	5.74825e-05
unc-23	0.572383	0.103719	3.41779e-08	8.94653e-07
haf-7	0.566664	0.196856	0.00399475	0.0277689
F37A4.5	0.566218	0.157233	0.000316826	0.003478
ZK632.4	0.565816	0.0857449	4.14418e-11	1.5136e-09
C44C10.9	0.565129	0.130529	1.49434e-05	0.000238562
rimb-1	0.564955	0.162356	0.000501906	0.00515276
nlp-13	0.564428	0.197306	0.00422739	0.0290401
ZK899.2	0.563464	0.142176	7.39662e-05	0.0009819
gst-36	0.562219	0.111848	4.99219e-07	1.05853e-05
F22F7.7	0.560448	0.169165	0.000922908	0.0084769
F26A3.5	0.559767	0.140492	6.76701e-05	0.000910982
mlt-7	0.557665	0.111744	6.02094e-07	1.26132e-05
R07E5.6	0.557279	0.169089	0.000981521	0.00888368
irld-1	0.55714	0.201814	0.00576839	0.0370537
B0454.6	0.557033	0.142417	9.18063e-05	0.00118499
pho-4	0.556819	0.140077	7.03518e-05	0.000941081
T25G12.6	0.556724	0.183445	0.00240668	0.0184596
fer-1	0.556018	0.201245	0.00572916	0.0368526
asp-5	0.555637	0.0643193	5.6837e-18	3.65433e-16
gsto-3	0.554761	0.209098	0.00797532	0.0479206
C52A10.1	0.554199	0.164139	0.000734422	0.00705693
pqn-74	0.552672	0.144467	0.000130461	0.00161746
lea-1	0.552276	0.0648569	1.66161e-17	1.03464e-15
Y15E3A.4	0.551277	0.0939861	4.4773e-09	1.3014e-07
lec-6	0.549191	0.113283	1.24735e-06	2.47203e-05
K09F6.3	0.549115	0.137268	6.32582e-05	0.000857704
C36H8.1	0.548695	0.11386	1.44268e-06	2.827e-05
tbc-7	0.547481	0.138351	7.58355e-05	0.00100298
ZK863.8	0.547136	0.188139	0.00363579	0.0257103
ogr-2	0.54613	0.195861	0.00529756	0.0347197
nac-3	0.544738	0.119707	5.34935e-06	9.31763e-05
ugt-2	0.544036	0.171727	0.00153473	0.0127913
zmp-3	0.543302	0.110942	9.72164e-07	1.9686e-05
pqn-94	0.543197	0.150682	0.000312246	0.00344384
dhs-18	0.542465	0.16615	0.00109502	0.00971867
T08G3.4	0.542385	0.171475	0.00156127	0.0129815
C11H1.9	0.541085	0.181288	0.00283883	0.0211014
Y66H1A.5	0.540295	0.144158	0.000178288	0.00212605
VC5.2	0.538645	0.145653	0.000217185	0.00252303
acl-12	0.538584	0.15179	0.000387849	0.00413061
asp-2	0.538207	0.0717091	6.12278e-14	3.10636e-12
T19C3.5	0.538178	0.18976	0.00456689	0.030811
Y48G9A.9	0.537543	0.115337	3.15247e-06	5.82559e-05
R08C7.12	0.536974	0.189875	0.00468334	0.0314446
cyp-43A1	0.536147	0.163457	0.00103792	0.00930061
Y66D12A.24	0.53426	0.2021	0.00820433	0.0488078
dhs-14	0.533834	0.200156	0.00765113	0.0463262
Y52B11A.8	0.533779	0.156805	0.000663855	0.00648607
T25F10.3	0.531932	0.176998	0.00265313	0.0199335
Y47G6A.3	0.531846	0.190119	0.00515107	0.03398
svh-2	0.531389	0.109364	1.18042e-06	2.34605e-05
Y43E12A.2	0.53093	0.165943	0.00137684	0.0117061
M176.4	0.530104	0.145612	0.000272075	0.00307367
C53B7.3	0.529149	0.109932	1.48372e-06	2.89522e-05
ant-1.4	0.528655	0.14354	0.00023053	0.00266475
Y53H1B.2	0.528607	0.126843	3.08088e-05	0.000454862
F21D12.3	0.528129	0.14895	0.000391599	0.00415798
acdh-7	0.528059	0.1252	2.46792e-05	0.000374266
ceh-91	0.528006	0.189059	0.00522535	0.0343401
F48D6.4	0.527263	0.112234	2.6284e-06	4.92895e-05
Y47G6A.21	0.527031	0.134828	9.27148e-05	0.00119332
pqn-92	0.526611	0.163127	0.00124556	0.0107671
ges-1	0.526566	0.156257	0.000752031	0.00719394
ttr-32	0.526372	0.188952	0.00534038	0.0348988
math-27	0.525315	0.164722	0.00142716	0.012024
sst-20	0.524799	0.167528	0.00173261	0.0141798
flp-1	0.524103	0.15442	0.000688775	0.0066781
ugt-23	0.522906	0.157447	0.000896483	0.00828876
clec-85	0.52163	0.169354	0.00206913	0.0163932
C24A11.1	0.520701	0.159058	0.00106166	0.00947617
hlh-11	0.52048	0.0913218	1.20226e-08	3.33478e-07
C05D12.3	0.520305	0.0984148	1.24436e-07	2.94759e-06
W09D6.5	0.519987	0.122255	2.10635e-05	0.000324727
epg-9	0.519364	0.15166	0.000615866	0.00612442
mboa-4	0.518578	0.17789	0.00355505	0.0252674
mpst-4	0.518281	0.149374	0.000521069	0.00530267
F09C3.2	0.518037	0.194741	0.00781104	0.0470145
C46G7.1	0.517903	0.134963	0.000124366	0.00154786
B0546.4	0.517402	0.170484	0.00240622	0.0184596
T23F6.3	0.517098	0.185451	0.00529804	0.0347197
C30F12.5	0.516975	0.12875	5.93608e-05	0.000811962
snf-2	0.516908	0.185664	0.0053676	0.0350275
T21H3.1	0.515286	0.0792739	8.02804e-11	2.84282e-09
F02D8.4	0.514668	0.0977738	1.41062e-07	3.30774e-06
F07F6.1	0.514262	0.164717	0.00179567	0.0145828
R03G8.6	0.513761	0.122338	2.67461e-05	0.000401681
C34D4.2	0.513647	0.165166	0.00187165	0.0151381
lec-4	0.513194	0.112126	4.71869e-06	8.35472e-05
nlp-21	0.511933	0.184818	0.0056069	0.0362164
cpt-1	0.510782	0.0719378	1.24457e-12	5.47769e-11
F21D5.3	0.509772	0.110714	4.13661e-06	7.40909e-05
ida-1	0.509292	0.128569	7.45672e-05	0.000988937
acs-6	0.508493	0.139607	0.00027019	0.00305733
trpp-12	0.506458	0.175413	0.00388651	0.0271394
F15A4.6	0.506017	0.16197	0.00178329	0.0145076
fkh-9	0.504949	0.11782	1.82109e-05	0.000283886
F25F2.1	0.504888	0.176613	0.00425356	0.0291625
sod-1	0.503814	0.102195	8.2264e-07	1.68045e-05
R155.3	0.503796	0.186154	0.00680291	0.0419751
spch-2	0.503711	0.126742	7.059e-05	0.000943363
C18E9.8	0.503689	0.153639	0.00104397	0.00934283
C01B10.6	0.503402	0.100642	5.67605e-07	1.19086e-05
T23B12.11	0.501731	0.189243	0.00801935	0.0480582
F01G10.5	0.501488	0.183035	0.00614674	0.0388755
F36A4.4	0.500594	0.184874	0.00677414	0.0419148
sipa-1	0.499612	0.155914	0.00135338	0.011563
asp-3	0.499547	0.0580898	8.00172e-18	5.09772e-16
T27C4.1	0.498705	0.146059	0.000639211	0.00632054
eppl-1	0.498325	0.0846781	3.98204e-09	1.16053e-07
F59A6.4	0.496636	0.153568	0.0012208	0.0105924
MTCE.33	0.496099	0.135646	0.000254885	0.00291011
Y73B6BL.31	0.494842	0.173332	0.00430522	0.0293437
Y48G1BR.1	0.494394	0.163322	0.00246902	0.0188342
ZK930.2	0.494236	0.176375	0.00507576	0.0335784
gpx-5	0.493562	0.0999931	7.9758e-07	1.63645e-05
T05E12.6	0.493093	0.0962774	3.02983e-07	6.69925e-06
T04F3.3	0.492804	0.154313	0.00140541	0.0118632
lim-8	0.492716	0.124275	7.34823e-05	0.000977336
Y57G11C.6	0.489195	0.185034	0.00819801	0.0487964
rnf-145	0.488866	0.164087	0.00288894	0.0214055
tag-196	0.488643	0.110163	9.18027e-06	0.000151578
lips-10	0.487723	0.175397	0.00542461	0.0353005
ssp-35	0.487371	0.142842	0.000644967	0.00636305
C05D2.8	0.486821	0.111339	1.22883e-05	0.000199356
F46G10.2	0.486743	0.179541	0.00670722	0.0416648
pqn-44	0.486263	0.0915541	1.08898e-07	2.61505e-06
W06B4.2	0.486102	0.159986	0.00237836	0.0182927
BE10.1	0.485673	0.165959	0.00342834	0.0245293
K07C11.7	0.485565	0.113686	1.94519e-05	0.000302219
T22C1.8	0.485512	0.119497	4.84558e-05	0.000680821
lbp-7	0.484537	0.169392	0.00423049	0.0290437
F21F3.6	0.483513	0.0903267	8.65399e-08	2.11085e-06
ptr-23	0.48091	0.13002	0.000216674	0.00252303
pfk-1.2	0.480668	0.173961	0.00572578	0.0368478
Y119D3B.13	0.480123	0.133033	0.000307304	0.00339201
vab-19	0.478596	0.172665	0.00557448	0.0360906
hphd-1	0.477668	0.061589	8.78342e-15	4.69526e-13
T24B8.4	0.475948	0.118239	5.69017e-05	0.00078216
cpg-8	0.474266	0.132858	0.000357356	0.00385303
cTel55X.1	0.47218	0.159764	0.00312177	0.0228395
cpi-2	0.471709	0.156617	0.00259644	0.0195749
F18C5.10	0.47078	0.140296	0.000791881	0.00750566
ZC581.3	0.470682	0.137499	0.000618958	0.00614641
mrp-3	0.469986	0.153763	0.00223885	0.0174666
snf-3	0.468046	0.0924629	4.14917e-07	8.87872e-06
T10B10.4	0.466951	0.131138	0.000369766	0.00396235
ZK484.7	0.466113	0.170323	0.00620689	0.0392026
Y55B1BL.1	0.464208	0.142644	0.00113666	0.0100118
lem-3	0.463776	0.121532	0.000135579	0.00166955
nex-3	0.463364	0.122538	0.000155954	0.0018907
T19H5.4	0.463339	0.150529	0.00208347	0.0164788
C04G2.3	0.462949	0.116747	7.32707e-05	0.000975451
dgk-2	0.462685	0.128646	0.000322413	0.00353363
T27A3.5	0.462262	0.127766	0.00029683	0.00329203
C09D4.3	0.462012	0.129026	0.000342572	0.00371662
T12B3.3	0.461355	0.0897812	2.76702e-07	6.1967e-06
C06A1.3	0.460441	0.127051	0.000289996	0.00323165
clh-3	0.459791	0.152419	0.00255603	0.0193393
aqp-8	0.45905	0.088387	2.06231e-07	4.72469e-06
gln-1	0.45903	0.166583	0.00585919	0.0374609
add-2	0.458422	0.165438	0.00558929	0.0361523
clec-151	0.45713	0.145422	0.00166961	0.0137187
nep-17	0.45515	0.073791	6.91193e-10	2.23748e-08
comp-1	0.454463	0.151503	0.00270254	0.0202502
Y25C1A.13	0.454443	0.140318	0.00120094	0.0104657
C08F8.6	0.452321	0.159986	0.00469485	0.0315067
Y44A6D.5	0.451724	0.1491	0.00244813	0.0187364
spe-26	0.449165	0.131406	0.00063052	0.00624345
tos-1	0.448087	0.0872908	2.84748e-07	6.35234e-06
F13D12.9	0.44719	0.113108	7.69643e-05	0.00101302
hda-4	0.446637	0.144773	0.002035	0.0161872
dct-11	0.446458	0.14597	0.00222402	0.017364
F32D8.12	0.445716	0.0925545	1.46673e-06	2.86608e-05
T28H11.7	0.445582	0.127895	0.000494028	0.00508309
daf-5	0.443233	0.110993	6.51476e-05	0.000879903
K06G5.1	0.443146	0.0947896	2.93888e-06	5.4671e-05
crm-1	0.441982	0.150516	0.00331997	0.0239257
clec-79	0.441204	0.143795	0.00215289	0.0169606
bcl-11	0.440844	0.11845	0.00019783	0.00232138
ant-1.3	0.440441	0.102069	1.59511e-05	0.000252324
ZK637.12	0.44041	0.139468	0.00158973	0.0131632
F27C8.5	0.440383	0.13689	0.00129515	0.0111132
pgal-1	0.440287	0.132684	0.000905596	0.00834536
cbp-3	0.440285	0.135105	0.00111865	0.00989066
ZK822.5	0.438659	0.109372	6.05397e-05	0.00082566
F47D12.7	0.438048	0.137168	0.00140552	0.0118632
ZK121.2	0.436719	0.147918	0.00315264	0.0230171
dpf-2	0.436622	0.105143	3.28646e-05	0.000481646
H27A22.1	0.435373	0.132106	0.000981988	0.00888368
acdh-4	0.434902	0.158742	0.00614988	0.0388777
F35G12.5	0.434855	0.157568	0.00578387	0.037136
scrm-5	0.434679	0.163378	0.00780096	0.0469741
B0280.11	0.434658	0.163867	0.00798974	0.0479866
C08F11.10	0.434618	0.143972	0.00253808	0.0192348
Y38F1A.1	0.432174	0.138632	0.0018244	0.0147902
myrf-2	0.432121	0.139704	0.00198063	0.0157817
R11E3.1	0.431075	0.132882	0.00117848	0.0103021
B0379.2	0.430996	0.154849	0.00538045	0.0350949
F40G12.10	0.430623	0.157631	0.00629806	0.0396886
aagr-1	0.429066	0.114226	0.000172449	0.0020617
ccch-1	0.428399	0.119777	0.000348054	0.00376146
H34I24.2	0.428384	0.0951485	6.72329e-06	0.000114924
ZC328.3	0.428072	0.162241	0.0083277	0.049274
mca-2	0.425931	0.0997059	1.93832e-05	0.000301488
cpi-1	0.425678	0.104406	4.55924e-05	0.000645138
T24B8.3	0.425654	0.146798	0.00373653	0.026263
dod-19	0.425073	0.0969641	1.16616e-05	0.000189629
Y105C5A.8	0.425009	0.13982	0.00236826	0.0182351
gon-2	0.423969	0.122032	0.000512307	0.00523642
dlg-1	0.422587	0.139558	0.00246145	0.0187971
cat-4	0.422087	0.100962	2.90683e-05	0.000430532
Y97E10C.1	0.421729	0.117578	0.000334768	0.0036518
tat-4	0.419981	0.109307	0.000121936	0.00152442
F42A10.6	0.41995	0.1117	0.000170164	0.00203768
T03F7.7	0.419711	0.158122	0.00794624	0.0477665
C24B9.3	0.419391	0.0886983	2.2642e-06	4.29213e-05
C33F10.11	0.418929	0.12689	0.000961691	0.00875817
obr-2	0.41825	0.116785	0.000341818	0.00371132
egl-13	0.416021	0.155477	0.00745589	0.0453068
slrp-1	0.41433	0.0971586	2.00381e-05	0.000309946
Y92H12A.2	0.413359	0.126319	0.00106659	0.00950871
C50F2.5	0.412981	0.139876	0.0031524	0.0230171
marg-1	0.412264	0.118189	0.000486303	0.00502213
msp-142	0.411263	0.15443	0.00774233	0.0467017
F45E1.4	0.410518	0.141013	0.00360034	0.0255114
Y105E8A.27	0.410377	0.151573	0.00678026	0.0419148
F54C8.1	0.410158	0.143576	0.00428032	0.0292711
K07A3.3	0.406501	0.141452	0.00405599	0.0280839
B0353.1	0.406371	0.14956	0.00658533	0.0411628
sup-1	0.404035	0.136972	0.00318016	0.0231816
C35E7.10	0.403602	0.140883	0.00417264	0.0286965
ZK1320.2	0.403394	0.0981067	3.92617e-05	0.000567059
T02C5.1	0.403064	0.0844924	1.83847e-06	3.5331e-05
smp-1	0.402688	0.136966	0.00328141	0.0237706
lron-7	0.402189	0.0866699	3.47619e-06	6.33985e-05
nhr-88	0.401345	0.111517	0.000319477	0.0035042
asm-2	0.39938	0.127929	0.00179696	0.0145847
F54D1.6	0.399091	0.143448	0.00540022	0.035191
fos-1	0.398681	0.144277	0.00572201	0.0368405
Y69E1A.5	0.398551	0.121974	0.00108496	0.00964779
Y17G7B.10	0.398367	0.0985322	5.27685e-05	0.000732564
T19C3.4	0.396697	0.148315	0.00747991	0.045433
R11D1.1	0.395629	0.129772	0.00229882	0.0178603
aman-1	0.394266	0.103956	0.000149058	0.0018234
asp-1	0.393976	0.0659592	2.32887e-09	6.95767e-08
C01B10.3	0.393634	0.132507	0.00297151	0.0219009
ogt-1	0.39239	0.0968681	5.10494e-05	0.00071153
nduo-6	0.392079	0.129549	0.00247414	0.018863
C55C3.3	0.392026	0.133953	0.00342703	0.0245293
B0205.10	0.391853	0.11554	0.000695107	0.00673014
Y73F4A.2	0.391287	0.123161	0.00148792	0.0124607
ZK673.2	0.391139	0.0908039	1.65102e-05	0.000260282
C17H11.6	0.389446	0.143935	0.00681609	0.0420045
C43E11.5	0.389201	0.138878	0.00507133	0.0335784
cpl-1	0.387986	0.0623813	4.98454e-10	1.63249e-08
kel-10	0.387874	0.12533	0.00196933	0.0157186
msa-1	0.385283	0.145511	0.00810205	0.0483696
F16A11.1	0.384991	0.107978	0.000363217	0.00391019
tbc-14	0.384757	0.118417	0.00115745	0.0101629
cblc-1	0.384506	0.128543	0.00277827	0.0207397
F42A10.7	0.384286	0.102136	0.000168238	0.00202001
F13D12.6	0.381378	0.0677814	1.83802e-08	4.99884e-07
unc-51	0.379625	0.122257	0.00190186	0.0153238
F57F4.1	0.379583	0.142387	0.00767942	0.0464025
col-149	0.378567	0.0972163	9.85772e-05	0.00126063
upp-1	0.376641	0.093722	5.85187e-05	0.000801229
somi-1	0.37645	0.13372	0.00487443	0.0325709
sea-2	0.376123	0.109708	0.000607151	0.00605935
C05B5.2	0.37457	0.0986944	0.000147497	0.00180674
C34F11.5	0.374005	0.118171	0.00155116	0.012905
pezo-1	0.371959	0.102354	0.000279006	0.00313926
F17H10.1	0.371927	0.0996213	0.000188909	0.00223604
T28B8.1	0.371248	0.107724	0.000568316	0.00572089
C35B1.5	0.369832	0.127065	0.00360771	0.0255507
Y59E9AL.2	0.369099	0.0973226	0.000149118	0.0018234
Y43F8A.2	0.368562	0.110663	0.000866956	0.00810708
msp-38	0.368186	0.100862	0.000261851	0.00298232
Y62E10A.13	0.367913	0.106798	0.000571182	0.00574559
lact-3	0.367133	0.120668	0.00234623	0.0181255
T22B11.4	0.366386	0.130524	0.00500009	0.0332197
gska-3	0.366136	0.119438	0.00217314	0.0170718
lfe-2	0.363713	0.111888	0.00115132	0.0101217
F56C9.7	0.36303	0.107733	0.000752433	0.00719394
snt-4	0.361452	0.132498	0.00637242	0.0400486
W09C3.7	0.360811	0.115482	0.00178177	0.0145076
R13H4.2	0.360464	0.103005	0.000466155	0.00484996
F58G1.3	0.358665	0.135733	0.00823143	0.0489118
ppw-2	0.357931	0.080924	9.73174e-06	0.000159926
F58D2.2	0.357521	0.10544	0.000697023	0.00674401
ZK228.4	0.355787	0.123707	0.00402681	0.0279374
F28B4.3	0.354169	0.0840217	2.49551e-05	0.000377628
egl-21	0.353095	0.101304	0.000491194	0.0050614
zmp-4	0.352498	0.117689	0.002743	0.0205093
R105.1	0.352441	0.111761	0.00161313	0.0133174
F37C4.5	0.351955	0.0688166	3.14758e-07	6.93761e-06
ddo-2	0.351917	0.0963436	0.000259469	0.00295761
pfas-1	0.351267	0.11547	0.00234957	0.0181312
C50E10.1	0.350208	0.106595	0.00101839	0.00915456
sbt-1	0.349384	0.1261	0.00559389	0.0361523
W02B12.12	0.348873	0.101729	0.000604848	0.0060449
decr-1.1	0.347939	0.130479	0.00766176	0.046356
hlh-30	0.347323	0.108758	0.0014054	0.0118632
pcyt-2.1	0.34521	0.1133	0.00231241	0.0179437
dlk-1	0.34465	0.103874	0.00090681	0.00835103
T12B3.2	0.344262	0.12546	0.00606941	0.0385261
pqn-52	0.343014	0.0889409	0.000114954	0.0014449
clik-3	0.342696	0.107158	0.00138361	0.0117279
F35E12.10	0.342106	0.107422	0.001449	0.012164
dhs-28	0.341577	0.0773206	9.97675e-06	0.000163567
K02D7.1	0.341427	0.0804278	2.18464e-05	0.000334946
alg-4	0.339338	0.109487	0.00193945	0.0155513
F32B5.6	0.338565	0.0950061	0.000365792	0.00393409
spch-1	0.338216	0.0820127	3.72439e-05	0.000541278
allo-1	0.337498	0.0969186	0.000497167	0.00510906
Y38C1AA.7	0.337271	0.0718993	2.72029e-06	5.09443e-05
tank-1	0.334748	0.113045	0.00306439	0.0225141
metr-1	0.331823	0.0672796	8.13901e-07	1.66504e-05
F55H12.4	0.33175	0.088965	0.000192242	0.00226534
B0261.6	0.331498	0.11373	0.00355945	0.0252752
R08E3.1	0.33145	0.0989634	0.000810392	0.00766548
papl-1	0.327568	0.0915529	0.000346354	0.00374599
myo-5	0.326357	0.107436	0.00238396	0.0183256
K07E3.4	0.324301	0.0866086	0.000180798	0.00214863
mib-1	0.32214	0.119533	0.00703894	0.0431302
K12C11.1	0.322033	0.0991305	0.00115985	0.0101775
pyk-2	0.320644	0.0865605	0.000211995	0.00247304
snb-1	0.318761	0.102066	0.00178958	0.0145502
myo-2	0.318459	0.0690302	3.96285e-06	7.15261e-05
uda-1	0.318345	0.0883655	0.000315055	0.00347139
nex-1	0.317443	0.0685461	3.63758e-06	6.59111e-05
xbp-1	0.314983	0.0770898	4.39011e-05	0.000625527
C30E1.9	0.313987	0.079921	8.54019e-05	0.0011084
aqp-2	0.31377	0.0951905	0.000979919	0.00888358
tnt-3	0.310267	0.0817332	0.00014699	0.00180211
catp-4	0.310128	0.0854683	0.000284991	0.00318861
aqp-1	0.30663	0.115743	0.00806776	0.0482475
M01H9.3	0.304867	0.0886583	0.000584572	0.00586759
F19C7.1	0.303925	0.104108	0.00350795	0.0250091
ccg-1	0.303327	0.10504	0.00388022	0.0271091
cpz-2	0.302821	0.102742	0.0032047	0.0233118
egl-3	0.301428	0.0903654	0.000850962	0.00798965
dhs-6	0.299941	0.112658	0.00775839	0.0467565
pqn-83	0.299922	0.0980502	0.0022218	0.0173564
Y69E1A.1	0.298604	0.0739055	5.33706e-05	0.000737862
pck-2	0.296191	0.0545962	5.79145e-08	1.45853e-06
alx-1	0.294931	0.103637	0.00442999	0.0300765
Y34B4A.6	0.294489	0.0867612	0.000688164	0.00667682
alh-8	0.294101	0.0574826	3.115e-07	6.87665e-06
afd-1	0.293108	0.103605	0.00466821	0.0313581
spch-3	0.290158	0.0991091	0.00341525	0.0244608
msp-40	0.289079	0.109052	0.00802895	0.0480772
gcp-2.1	0.288345	0.0895951	0.0012895	0.0110783
ncs-2	0.288262	0.0879736	0.00105031	0.00939353
ifc-2	0.285544	0.064434	9.35469e-06	0.000153911
mnk-1	0.283613	0.093116	0.0023206	0.0179972
clik-2	0.282574	0.0934008	0.0024831	0.0189003
did-2	0.282264	0.104342	0.00682655	0.0420503
T08B6.4	0.282238	0.0836531	0.00074108	0.00710134
anp-1	0.281731	0.090176	0.00178267	0.0145076
spe-15	0.279317	0.0850879	0.00102824	0.00923163
F26A3.4	0.278631	0.100133	0.00539241	0.0351565
msp-77	0.278607	0.0946257	0.00323682	0.0234964
scav-2	0.275976	0.0966389	0.00429359	0.0292933
B0379.7	0.272981	0.0931071	0.00336893	0.024216
zig-11	0.269827	0.0830861	0.00116398	0.0102073
C33F10.1	0.269162	0.0830208	0.00118648	0.0103656
vha-14	0.268465	0.0870296	0.00203716	0.0161902
vha-10	0.267405	0.092766	0.00394436	0.0274609
Y51F10.7	0.266399	0.0942404	0.00470156	0.0315366
cab-1	0.262208	0.080884	0.00118784	0.010371
F22D6.2	0.261305	0.0786063	0.000886655	0.00822514
gsp-3	0.260726	0.0833577	0.00176123	0.0143784
T04H1.2	0.260452	0.0903612	0.00394725	0.0274674
ttr-14	0.26027	0.0860377	0.00248573	0.01891
ape-1	0.254676	0.0941255	0.00681594	0.0420045
W10C8.5	0.25459	0.0711135	0.000343518	0.00372109
snf-5	0.254444	0.0892232	0.00434767	0.029604
ZK370.4	0.251919	0.0898988	0.00507476	0.0335784
ppm-2	0.249525	0.0824741	0.00248228	0.0189003
chat-1	0.241041	0.0868743	0.00552698	0.0358162
vha-15	0.23843	0.0753066	0.00154484	0.0128678
vha-17	0.237798	0.0793645	0.00273301	0.0204555
vha-6	0.236436	0.0666427	0.000388429	0.00413061
cpn-1	0.236202	0.0744551	0.00151179	0.0126416
mca-3	0.234726	0.0725404	0.00121301	0.0105445
apl-1	0.233633	0.0818118	0.00429363	0.0292933
cgp-1	0.230876	0.0809862	0.00436083	0.0296792
bcat-1	0.230542	0.0677126	0.000662312	0.00647553
F28H7.3	0.230125	0.078283	0.00328585	0.0237781
eat-6	0.230103	0.0849584	0.00676051	0.0419006
irg-7	0.226084	0.084056	0.007152	0.0436695
T10E9.4	0.223856	0.0721219	0.00191019	0.0153611
pcp-1	0.22137	0.0821764	0.0070634	0.043261
ifa-1	0.220525	0.072721	0.0024255	0.0185937
F21H7.5	0.220232	0.0794732	0.00558587	0.0361475
C04G2.9	0.215683	0.0680602	0.00152965	0.0127565
ZK938.1	0.215193	0.0792848	0.00664398	0.0413721
kin-1	0.21493	0.0813952	0.0082765	0.049096
msp-81	0.210696	0.0794578	0.00800935	0.0480423
F27C1.1	0.209697	0.0794368	0.00829568	0.0491585
F25B5.3	0.208149	0.0679185	0.00217901	0.0170981
pod-1	0.20719	0.0724588	0.00424422	0.0291128
lec-2	0.206029	0.0649459	0.00151224	0.0126416
acs-1	0.196011	0.0624194	0.00168819	0.0138469
lec-5	0.191943	0.0725802	0.00817955	0.0487072
ech-1.2	0.180492	0.0664636	0.00661462	0.0413103
fln-1	0.168955	0.0629195	0.00724735	0.0441551
acdh-1	0.145119	0.0533942	0.00657	0.0410868

## Sheet: 7
gene	Concise description
catp-2	NA
nhx-6	nhx-6 encodes a sodium/proton exchanger expressed mainly in the basolateral plasma membranes of the most posterior and anterior cells of the intestine, but mainly in the apical surface of medial intestinal cells; nhx-6 has no obvious phenotype in mass RNAi screens; NHX-6 is thought to prevent intracellular acidification by catalysing the electroneutral exchange of extracellular sodium for an intr…
C02E7.10	NA
ilys-3	NA
F07C6.6	NA
dod-3	NA
F59A6.10	NA
Y58A7A.4	NA
fipr-26	NA
C54F6.12	NA
dct-19	NA
B0563.10	NA
Y49F6B.12	NA
ZK970.7	ZK970.7 encodes, along with C06A8.3, one of two C. elegans proteins with similarity to the Onchocerca volvulus Ov17 hypodermal antigen; ZK970.7 expression increases in lin-35; slr-2 doubly mutant animals and in response to stressors such as ionizing radiation and bacterial infection.
nspe-6	NA
T26H5.9	NA
F14F9.3	NA
K01A6.7	NA
nas-10	nas-10 encodes an astacin-like metalloprotease.
F02H6.6	NA
mltn-12	NA
cnc-4	cnc-4 encodes one of eleven C. elegans caenacin peptides; cnc-4 expression is strongly induced after infection by the fungus Drechmeria coniospora, suggesting that it functions as a secreted antimicrobial peptide in the innate immune response.
C50F7.5	NA
H23N18.6	NA
scl-2	scl-2 encodes a predicted extracellular protein that is a member of the C. elegans family of SCP/TAPS (sperm coating protein/Tpx-1/Ag5/PR-1/Sc7) domain-containing proteins; an scl-2 deletion mutation, tm2428, is reported to be homozygous viable.
catp-3	NA
str-144	NA
pitr-4	NA
F26A1.8	NA
mltn-9	NA
grl-7	grl-7 encodes a hedgehog-like protein, with an N-terminal signalsequence, a central low-complexity region, and a C-terminal Ground-like(Grl) domain; GRL-7 is expressed in intestine, hypodermis, and seamcells; the Grl domain is predicted to form a cysteine-crosslinkedprotein involved in intercellular signalling, and it has subtlesimilarity to the N-terminal Hedge domain of HEDGEHOG proteins.
comt-4	NA
fip-6	NA
parg-2	parg-2 (formerly known as pme-4) encodes a poly(ADP-ribose) glycohydrolase (PARG) orthologous to human PARG (OMIM:603501) and paralogous to PARG-1; PARG-2 exhibits poly(ADP-ribose) glycohydrolase activity in vitro, and is required in vivo for normal resistance to ionizing radiation; PARG-2 is primarily expressed in the cytoplasm of nerve cells in the head and tail, and also in embryos; neuronal e…
C08F11.13	NA
jud-4	jud-4 encodes an unfamiliar protein, putatively secreted, that isrequired both for normal sensitivity to ethanol and for survival afterfreezing and thawing; JUD-4 is expressed in hypodermis and vulvalmuscles; JUD-4 is orthologous to Brugia malayi Bm1_40315, but lacksobvious orthologies to non-nematode proteins; JUD-4's C-terminal domainhas possible similarity to F40E10.5, and to proteins such as …
R05H10.1	NA
C29F3.3	NA
T22B7.3	NA
T10C6.15	NA
C06B3.7	NA
pitr-5	NA
cyp-14A5	cyp-14A5 encodes one of ~80 C. elegans cytochrome P450s: membrane-associated, heme-containing NADPH-dependent monooxygenases that catalyze the oxidative metabolism of a variety of exogenous compounds and endogenous substrates; cyp-14A5 expression is upregulated in response to stressors such as ionizing radiation and bacterial infection.
fipr-23	NA
best-5	NA
his-9	his-9 encodes an H3 histone; by homology, HIS-9 is predicted to function as a nucleosome component required for packaging of DNA into chromatin; his-9 is a replication-dependent histone locus that resides in the HIS3 cluster on chromosome II.
his-13	his-13 encodes an H3 histone; his-13 is contained within the histone gene cluster HIS3.
cng-1	NA
F01D5.6	NA
cyp-32B1	NA
trx-3	NA
twk-45	NA
M03A1.8	NA
ilys-2	NA
K02E11.10	NA
Y34F4.2	NA
far-3	NA
tag-297	NA
F53A9.7	NA
cpt-3	NA
Y77E11A.14	NA
col-79	NA
pho-8	NA
nlp-62	NA
gst-13	NA
Y45F10D.6	NA
Y39A3A.4	NA
col-113	NA
ghi-1	ghi-1 encodes a secreted protein that is a member of a family of lipid and lipopolysaccharide-binding proteins; in conjunction with flr-2, which encodes the sole c. elegans glycoprotein hormone alpha subunit, ghi-1 activity is required for regulation of defecation cycle periods; GHI-1 physically interacts with FLR-2; ghi-1 is expressed in body wall muscles and the posterior intestine.
oac-14	NA
col-44	col-44 encodes a cuticle collagen.
F56D5.3	NA
C49G9.2	NA
Y37E11B.7	NA
col-169	NA
tts-1	NA
Y69H2.3	NA
fipr-22	NA
F57A8.7	NA
C42D4.3	NA
F38B7.2	NA
T12B3.1	NA
mec-10	The mec-10 gene encodes an amiloride-sensitive Na+ channel protein (degenerin) required to sense gentle mechanical stimuli (e.g. touch) along the body wall; it is paralogous to mec-4, which has similar function in vivo.
daao-1	daao-1 encodes a D-amino acid oxidase (DAAO); recombinant DAOO-1 has DAAO activity on neutral and basic D-amino acid substrates (e.g., D-alanine or D-methionine, and D-arginine), with highest catalytic efficiency on D-arginine; since the C-terminal residues of DAAO-1 match the PTS1 consensus sequence, DAAO-1 is predicted to be peroxisomal.
nhr-119	NA
col-109	col-109 encodes a cuticular collagen; loss of col-109 via large-scale RNAi screens results in no obvious defects.
K08F9.1	NA
T23B12.5	NA
ora-1	NA
T24C2.5	NA
Y41G9A.10	NA
kcc-2	kcc-2 encodes a potassium chloride cotransporter; in C. elegans, kcc-2 acts partially redundantly with the sodium-driven chloride-bicarbonate transporter, abts-1, for effecting GABA-receptor mediated inhibitory neurotransmission in the HSNs (hermaphrodite-specific neurons) that control egg-laying and in body wall muscle to control body length and movement; neuronal expression studies indicate tha…
F53A9.8	NA
smf-3	smf-3 encodes one of three C. elegans divalent-metal ion transporters (DMTs) orthologous to the mammalian DMT1 transporters and Saccharomyces cerevisiae Smf proteins; in C. elegans, SMF-3 functions as the main manganese uptake transporter; mutations in smf-3 display an increased tolerance to manganese exposure; SMF-3 is broadly expressed fromlate embryogenesis through adulthood, with strongest ex…
Y39B6A.1	NA
clec-52	NA
T06D8.10	NA
K01D12.5	NA
col-104	NA
F53F1.6	NA
M03A1.3	M03A1.3 encodes a protein with ~10 predicted transmembrane sequences; it has an internal repeat (in residues 74-351 and 377-668), with some similarity in these repeated domains to worm C05D12.1 and C13B4.1, and to mammalian stromal cell derived factor receptor 2.
lys-7	lys-7 encodes an enzyme homologous to an antimicrobial lysozyme encoded by the LYS4 gene of the protozoan parasite Entamoeba histolytica; LYS-7 functions in the innate immune response as an antimicrobial enzyme that, by homology, hydrolyzes the 1,4-beta-linkages between N-acetyl-D-glucosamine and N-acetylmuramic acid in peptidoglycan heteropolymers of prokaryotic cell walls; loss of lys-7 activit…
F14F9.4	NA
fat-5	fat-5 encodes a delta-9 fatty acid desaturase that is predicted to be mitochondrial; when expressed heterologously in S. cerevisiae, FAT-5 rescues the fatty acid auxotrophy of the yeast delta-9 desaturase mutant ole1.
T24B8.5	T24B8.5 encodes an ShK-like toxin peptide containing a domain rich in cysteine residues found in the sea anemone potassium channel inhibitor ShK; T24B8.5 expression is regulated by the PMK-1/p38 MAPK signaling pathway and the ATF-7 transcription factor, which is a downstream target of PMK-1.
ZC513.14	NA
T19B10.2	NA
D1086.3	NA
F57H12.6	NA
ttr-26	NA
T12D8.5	NA
oac-20	NA
D2045.8	NA
C45B2.2	NA
str-7	NA
K11G9.1	NA
ctl-1	ctl-1 encodes one of three C. elegans catalases; CTL-1 exhibits catalase activity in vitro, and thus likely functions in vivo as an antioxidant enzyme that protects cells from reactive oxygen species; ctl-1 activity contributes to the extended lifespan seen in daf-2 mutant animals; in addition, ctl-1 expression is negatively regulated by DAF-2-mediated insulin signaling; as CTL-1 does not possess…
F59E11.7	NA
grl-22	grl-22 encodes a hedgehog-like protein, with an N-terminal signalsequence, a central proline-rich low-complexity region, and a C-terminalGround-like (Grl) domain; the Grl domain is predicted to form acysteine-crosslinked protein involved in intercellular signalling, andit has subtle similarity to the N-terminal Hedge domain of HEDGEHOGproteins.
col-97	col-97 encodes a cuticular collagen; loss of col-97 activity via large-scale RNAi screens results in defects in body morphology and locomotion.
M03F4.6	NA
VZK822L.2	NA
clec-7	NA
clh-2	clh-2 encodes a chloride channel protein that is required for embryonic viability; may have two transcripts transcribed from alternative promoters, and the two transcripts might be expressed in different cell types.
grl-21	grl-21 encodes a hedgehog-like protein, with an N-terminal signalsequence, a central proline-rich low-complexity region, and a C-terminalGround-like (Grl) domain; GRL-21 is expressed in arcade cells andhypodermis; the Grl domain is predicted to form a cysteine-crosslinkedprotein involved in intercellular signalling, and it has subtlesimilarity to the N-terminal Hedge domain of HEDGEHOG proteins.
F44E2.4	NA
Y54G2A.11	NA
mlt-8	mlt-8 encodes a novel protein; during development, mlt-8 activity is required for molting; a mlt-8::gfp reporter is expressed in hypodermal cells and in a single posterior neuron.
lgc-21	NA
F21C10.10	NA
col-14	col-14 encodes a collagen protein that affects vulval morphology in a large-scale RNAi screen; mRNA expressed in embryos and transcript levels peak during each larval stage.
catp-1	catp-1 encodes an alpha subunit of the Na+/K+- and H+/K+-pump P-type ATPase family; catp-1 was identified in screens for animals resistant to developmental defects seen in larvae treated with the nicotinic agonist DMPP; genetic analyses indicate that catp-1 likely functions together with the let-60/Ras and daf-2/insulin-like receptor signaling pathways to regulate L2 larval developmental timing a…
ugt-29	NA
H20E11.2	NA
Y58A7A.3	NA
F41F3.3	NA
F13H8.5	F13H8.5 encodes a protein with a domain of unknown function (DB; IPR002602) that is found in several worm proteins, and a glutamine/asparagine-rich domain.
F13A7.11	NA
rol-6	The rol-6 gene encodes a cuticle collagen related to human collagen alpha 1 (III) chain precursor (OMIM:120180), and is required for normal cuticular morphology; ROL-6 interacts with SQT-1, a closely related cuticle collagen, and is expressed at all stages from L2 to adult with transcripts detected at each of the molts preceding these stages.
cut-2	cut-2 encodes a secreted protein which is a component of cuticlin, the insoluble residue of nematode cuticles; CUT-2 is expressed during all developmental stages and contributes to the external cortical layer of the cuticle of all larval stages.
nspe-7	NA
F26G1.5	NA
F35B3.4	NA
ZK180.5	NA
nas-30	nas-30 encodes an astacin family zinc metalloprotease with a single EGF domain and a CUB domain; nas-30 is expressed in the intestine and hypodermis.
col-115	NA
T08B1.1	NA
ptr-4	ptr-4 encodes a nematode-specific member of the sterol sensing domain(SSD) proteins, distantly paralogous to Drosophila PATCHED (PTC) andhuman PTCH (OMIM:601309, mutated in basal cell nevus syndrome); PTR-4 isstrongly required for normal molting from L4 to adult stages male taildevelopment (a role conserved in C. briggsae); PTR-4 is also requiredfor normal endocytosis of yolk by oocytes, adult al…
trhr-1	NA
grl-5	grl-5 encodes a hedgehog-like protein, with an N-terminal signalsequence, a central proline-rich low-complexity region, and a C-terminalGround-like (Grl) domain; the Grl domain is predicted to form acysteine-crosslinked protein involved in intercellular signalling, andit has subtle similarity to the N-terminal Hedge domain of HEDGEHOGproteins.
F54B8.4	The F54B8.4 gene encodes a homolog of Death Associated Protein 1 (DAP-1) protein that may be involved in apoptosis.
T19A5.3	NA
Y38E10A.14	Y38E10A.14 encodes a novel protein.
kin-15	kin-15 encodes a novel receptor protein tyrosine kinase; like kin-16, with which it is cotranscribed, kin-15 encodes a protein that displays some unusual features, including a very small extracellular domain (50 amino acids) that lacks a cysteine-rich region typical of ligand-binding domains of known receptor tyrosine kinases, an unusual amino acid substitution in the subdomain VI motif, and a la…
pqn-32	The protein product of this gene is predicted to contain a glutamine/asparagine (Q/N)-rich ('prion') domain, by the algorithm of Michelitsch and Weissman (as of the WS77 release of WormBase, i.e., in wormpep77).
W09G12.7	NA
Y45G12C.1	NA
Y47D7A.13	NA
K04H4.2	K04H4.2 encodes, by alternative splicing, three proteins ranging from628 to 1446 residues in length; K04H4.2 proteins are predicted to besecreted, with an N-terminal chitin-binding peritrophin-A domainfollowed by up to 15 cysteine-rich domains; the general organization ofK04H4.2 protein resembles that of T10E10.4; in mass RNAi assays, K04H4.2is required for larval growth and locomotion; K04H4.2 t…
E01G4.6	NA
F15E6.3	NA
F45E4.5	NA
C04A11.5	NA
F17C11.11	NA
F35E12.9	NA
F11E6.11	NA
cpr-1	cpr-1 encodes a cysteine protease of the cathepsin B-like cysteine protease family; cpr-1 appears to be required for embryogenesis; cpr-1 is specifically expressed in the gut of all stages except the embryo and around developing embryos in the gonad; expression of cpr-1 is regulated by three promoter GATA motifs.
Y69H2.9	NA
dpy-4	dpy-4 encodes a cuticle collagen; dpy-4 activity is required for normal body morphology, locomotion, and larval development.
lys-2	lys-2 is one of ten C. elegans lysozyme genes; as such, lys-2 can be predicted to have a role in lysozymal function including immune function.
argk-1	NA
clec-41	NA
R12E2.7	NA
nnt-1	nnt-1 encodes a proton-pumping nicotinamide nucleotide transhydrogenase predicted to be mitochondrial.
hsp-12.3	hsp-12.3 encodes a small heat-shock protein that forms heterotetramerswith HSP-12.2 and has no chaperone-like activity; structurally, HSP-12.3is mostly a beta-sheet; at least one HSP-12 (which may or may not beHSP-12.2) is ubiquitously expressed in L1 larvae, and later expressed inadult spermatids (and perhaps spermatocytes), and some adult vulvalcells; hsp-12.3 is upregulated in daf-2 mutants, s…
col-48	col-48 encodes a cuticle collagen.
Y95B8A.2	NA
Y38E10A.28	NA
F25E5.4	NA
C26F1.1	NA
col-17	col-17 encodes a collagen which is expressed in all developmental stages except eggs, like col-15, col-16, and col-20; collagen genes with this expression pattern may be used for synthesis of cuticles after the L1 stage (e.g., the L4 cuticle).
tbb-6	NA
tre-5	NA
F44A6.5	F44A6.5 encodes a novel protein conserved amongst nematodes.
Y57A10A.14	NA
clec-54	NA
srr-4	NA
clec-150	NA
nhx-4	nhx-4 encodes two isoforms of a sodium/proton exchanger expressed in the plasma membrane of nearly all cells and cell types; in polarized epithelial cells, NHX-4::GFP appears specifically located in the basolateral membrane, like human SLC9A1 ('NHE1'; OMIM:107310); nhx-4 has no reported mutant or RNAi phenotype, but, given its ubiquitous expression, may represent a housekeeping exchanger generall…
Y43C5A.3	NA
dpy-13	dpy-13 encodes a member of the collagen superfamily containing 20 copies of the collagen triple helix repeat; transcipt levels oscillate, peaking once during each larval stage.
ZK1307.2	NA
rol-8	rol-8 encodes a collagen that is enriched in dauer larvae; mutations cause adults to become left-handed rollers.
lipl-2	NA
cpr-4	cpr-4 encodes a cathepsin B-like cysteine protease expressed at all life stages.
ttr-23	NA
asns-2	NA
ctl-2	ctl-2 encodes one of three C. elegans catalases; CTL-2 exhibits catalase and peroxidase activity in vitro, and thus likely functions in vivo as an antioxidant enzyme that protects cells from reactive oxygen species; ctl-2 activity is required for normal lifespan as well as for the extended lifespan seen in daf-2 mutant animals; in addition, ctl-2 is required for normal egg-laying capacity and for…
F13D11.4	NA
col-71	NA
K04F1.9	NA
thn-2	NA
sqt-1	sqt-1 encodes a cuticle collagen; during larval and adult development, sqt-1 activity is required, likely redundantly, for normal cuticle, and hence organismal, morphology; sqt-1 mRNA abundance oscillates during larval development, peaking at one point during each larval stage and peaking again in adults; sqt-1 transcripts are also detected in animals at the L1-L2d molt; in the temporally distinc…
B0403.5	NA
F28F5.6	NA
T21C9.9	NA
C42D4.1	NA
F21A3.11	NA
ugt-5	NA
clec-43	NA
fmo-1	fmo-1 encodes a flavin-containing monoxygenase homologous to human FMO1, FMO2, and FMO3 (OMIM:602079, mutated in trimethylaminuria).
clec-218	NA
nas-9	nas-9 encodes an astacin-like metalloprotease; loss of nas-9 activity via RNAi results in low levels (6%) of embryonic lethality; a nas-9::GFP promoter fusion is expressed in embryos and in the hypodermis of larvae and adults.
K06A9.2	This gene encodes a protein containing an F-box, a motif predicted to mediate protein-protein interactions either with homologs of yeast Skp-1p or with other proteins.
M162.5	NA
col-58	NA
tep-1	NA
F22B7.9	F22B7.9 encodes a predicted methyltransferase; F22B7.9 reporter fusions are expressed in the intestine.
C06B3.6	NA
alh-13	NA
nas-38	nas-38 encodes an astacin-like metalloprotease; loss of nas-38 activity via RNAi in an rrf-3 mutant background results in an extended life span.
dhs-5	dhs-5 encodes a possible steroid dehydrogenase; DHS-5 generally resembles short chain-type alcohol/other dehydrogenases, but has two predicted N-terminal transmembrane sequences, and its closest relatives in vertebrates are known or putative steroid dehydrogenases such as hydroxysteroid (17-beta) dehydrogenase 12 from mouse (also known as KIK-I or DHBK_MOUSE).
F53B1.4	NA
F01D5.5	NA
hpo-26	NA
ZK84.1	NA
F23F12.12	NA
T27D12.1	NA
T05E12.3	NA
C27B7.9	NA
R08F11.4	NA
pho-9	NA
T24C4.4	NA
sqt-2	NA
col-63	NA
C06H2.7	NA
rol-1	rol-1 encodes a nematode cuticular collagen required for normal body morphology at the adult stage of development; rol-1 expression is under the control of the heterochronic pathway, as heterochronic mutants that synthesize adult cuticle early produce animals that roll as larvae, while heterochronic mutants that fail to execute normal adult development never display the roller phenotype.
W01F3.2	NA
ttr-37	NA
tyr-6	tyr-6 is orthologous to the human gene tyrosinase (TYR), which is involved in the conversion of tyrosine to melanin.
hmbx-1	hmbx-1 is an ortholog of human HMBOX1 (homeobox containing 1); it belongs to the HNF class of homeobox genes, which encodes an HNF domain and an atypical homeodomain; hmbx-1 is predicted to have DNA binding activity, based on protein domain information; hmbx-1 is expressed in the anal depressor muscle, intestine, anal sphincter muscle, body wall musculature, vulval muscle, ventral nerve cord, and…
ttr-29	NA
Y58A7A.5	NA
C04E6.7	NA
grl-16	grl-16 encodes, by alternative splicing, two hedgehog-like proteins withan N-terminal signal sequence, a central proline-rich low-complexityregion, and a C-terminal Ground-like (Grl) domain; the Grl domain ispredicted to form a cysteine-crosslinked protein involved inintercellular signalling, and it has subtle similarity to the N-terminalHedge domain of HEDGEHOG proteins.
tts-2	NA
C28C12.4	NA
dpy-5	dpy-5 encodes a Group I cuticle procollagen; dpy-5 activity is required for wild-type body length, cuticle structure (width of the annuli), postembryonic growth rates, and reproduction; dpy-5 is described as an intermediate collagen gene, as its mRNA, which is present in all larval stages, adults, and dauer larvae, increases in abudance two hours prior to the secretion of each new cuticle; a dpy-…
F42G4.5	NA
col-111	NA
F59B1.8	NA
Y69H2.10	NA
ZK909.3	NA
ZK180.6	NA
swt-6	NA
fbxa-37	This gene encodes a protein containing an F-box, a motif predicted to mediate protein-protein interactions either with homologs of yeast Skp-1p or with other proteins; this gene's encoded protein also contains an FTH/DUF38 motif, which may also mediate protein-protein interaction.
col-157	NA
Y44A6C.1	NA
oac-6	NA
F55G1.15	NA
ifc-1	ifc-1 encodes a nonessential intermediate filament protein; IFC-1 is predicted to function as a structural component of the cytoskeleton; IFC-1 has no function in RNAi assays.
Y51A2D.13	NA
hlh-33	NA
F47E1.2	NA
Y48A6B.7	Y48A6B.7 encodes a cytidine deaminase; by homology the product of Y48A6B.7 is predicted to function in deamination of cytidine to uracil.
C18H9.6	NA
F41E7.1	NA
C15A11.4	NA
F31F7.1	NA
lrp-1	lrp-1 encodes a low-density lipoprotein (LDL) receptor-like protein most closely related to the vertebrate gp330/megalin/LRP-2 proteins; during development, lrp-1 activity is required in the hyp7 syncytium for completion of molting and for growth beyond the third larval stage; LRP-1 is expressed on the apical surface of the hyp6 and hyp7 syncytia in hermaphrodites and males from hatching through …
col-138	NA
clec-48	NA
col-73	NA
sqt-3	sqt-3 encodes a cuticle collagen; during development, sqt-3 activity is essential for viability and normal body morphology; genetic and expression studies indicate that SQT-3 is a cuticle component at all stages of development and that SQT-3 likely forms higher order cuticular structures with the DPY-17 cuticular collagen, both of which are candidate substrates for the DPY-31 procollagen C-protei…
F10E9.12	NA
srd-14	NA
E04F6.8	NA
pqn-71	The protein product of this gene is predicted to contain a glutamine/asparagine (Q/N)-rich ('prion') domain, by the algorithm of Michelitsch and Weissman (as of the WS77 release of WormBase, i.e., in wormpep77).
C49G7.10	NA
che-12	che-12 encodes a conserved protein orthologous to the mammalian protein Crescerin1 encoded by the gene FAM179B (KIAA0423); CHE-12 activity is required continuously in sensory neurons for formation of distal ciliary segments and thus, for normal sensory cilium morphology and function and chemotaxis to a subset of attractants, including sodium chloride; CHE-12 contains four TOG domains whose tubuli…
col-65	NA
col-89	NA
col-49	col-49 encodes a cuticle collagen.
F32D8.7	NA
F53E10.1	NA
pqn-36	The protein product of this gene is predicted to contain a glutamine/asparagine (Q/N)-rich ('prion') domain, by the algorithm of Michelitsch and Weissman (as of the WS77 release of WormBase, i.e., in wormpep77).
E04F6.15	NA
acs-22	acs-22 encodes a protein homologous to the mammalian FATP1 and FATP4 fatty acid transport proteins (FATP)/very long chain fatty acid acyl-CoA synthetases; acs-22 functions redundantly with acs-20 to regulate formation of the cuticle surface barrier that prevents penetration of small molecules; acs-22 may affect cuticle development via its role in incorporation of very long chain fatty acids, but …
C16D9.4	NA
T12A7.6	NA
F01D5.1	NA
nas-11	nas-11 encodes an astacin-like metalloprotease; loss of nas-11 activity via RNAi has been reported to result in slow growth; large-scale expression studies reveal that a nas-11::GFP promoter fusion is expressed in the hypodermis and the nervous system.
dpy-6	dpy-6 encodes a novel, conserved protein that has similarity to human MUC2, a component of mucus layers; dpy-6 activity is required for normal body morphology; DPY-6 binds bovine calmodulin in vitro in a calcium-dependent manner.
cup-16	NA
erp-44.3	NA
best-8	NA
dhc-4	NA
E01G4.5	NA
abf-5	The abf-5 gene encodes a homolog of the antibacterial factor ASABF from Ascaris suum.
nhr-156	NA
linc-82	NA
acox-1.5	NA
cth-1	cth-1 encodes a putative cystathionine gamma-lyase; CTH-1 is orthologous to human CTH (OMIM:607657, mutated in cystathioninuria), extremely similar to its paralog CTH-2, and also paralogous to CBL-1; either CTH-1, or CTH-2, or both proteins weakly inhibitDHC-1 in vivo.
F13B12.3	NA
H10E21.4	NA
C25H3.10	NA
endu-2	NA
ugt-51	NA
cutl-24	NA
F53F8.4	NA
col-175	NA
T06E4.8	NA
tyr-1	C02C2.1 encodes a tyrosinase homolog with a glutamine/asparagine-rich domain.
Y71F9B.9	NA
clec-265	NA
F53F1.4	NA
Y47D3B.6	NA
fozi-1	fozi-1 encodes an unusual zinc-finger protein that has two C2H2 zinc-finger motifs that probably mediate transcriptional regulation along with a glutamine-rich region and a vestigial formin homology 2 (FH2) domain that has lost its ability to polymerize actin but retained its ability to dimerize; during postembryonic development, FOZI-1 acts with MAB-5 and redundantly with HLH-1/CeMyoD to autonom…
col-91	col-91 encodes a cuticle collagen; loss of col-91 via large-scale RNAi results in no obvious defects.
max-1	max-1 encodes a novel, conserved PH/MyTH4/FERM domain-containing protein; max-1 activityis required cell-autonomously in motor neurons for UNC-6-mediated, dorsally directed axon guidance, proper axon extension and axon fasciculation in the nerve cords, and fully normal backward locomotion; genetic analyses indicate that max-1 likely acts downstream of unc-6 and unc-5, and in parallel to unc-40 an…
ins-7	ins-7 encodes an insulin/IGF-1-like peptide; INS-7 is one of 40 insulin-like peptides in C. elegans; INS-7 likely functions as an agonist for the DAF-2 insulin/IGF-1 receptor, as loss of ins-7 activity via RNAi results in: 1) a significantly increased lifespan that is not further extended in long-lived daf-2 mutant animals, and 2) an increased frequency of dauer formation in animals containing an…
ztf-22	NA
ttr-30	NA
F59A7.2	NA
Y51A2D.21	NA
F56D2.5	NA
C34E7.4	NA
col-167	NA
Y105C5B.15	NA
R09A1.3	NA
C34F11.8	NA
M163.1	NA
kqt-3	kqt-3 encodes one of three C. elegans KCNQ-like potassium channel subunits and, with respect to humans, is most similar to the KCNQ1 channel protein which when mutated leads to inherited long QT syndrome (OMIM:607542); although loss of KQT-3 activity via large-scale RNAi screens results in no obvious abnormalities, KQT-3 likely functions to regulate cellular excitability as expression of KQT-3 in…
col-126	NA
col-127	NA
R07E3.7	NA
best-7	NA
F26F12.3	NA
F49F1.5	NA
C06E7.4	NA
W03F8.6	NA
crh-1	crh-1 encodes a homolog of the cyclic AMP-response element binding protein (CREB); crh-1 is involved in the transcription of CRE-sequence dependant genes activated by a CaM kinase cascade; crh-1 is required in the bilateral thermosensory neuron AFD, for a memory-related behaviour and for response to tap (nonlocalized mechanosensory stimulation) and tap habituation; crh-1 appears to be ubiquitousl…
M7.12	NA
igeg-2	NA
T07F12.4	NA
dct-1	dct-1 encodes a protein with similarity to the mammalian BNIP3 proteins that interact with Bcl-2 and the Adenovirus E1B 19kDa protein and that have been shown to have pro-apoptotic activity; loss of dct-1 activity via RNAi in daf-2 mutants and in gld-1; daf-2 doubly mutant animals indicates that dct-1 can function to regulate both lifespan and tumor cell proliferation; when expressed in mammalian…
C14C6.5	C14C6.5 encodes a protein that contains a Metridin-like ShK toxin domain; C14C6.5 is involved in the transcriptional, innate immune response towards several different bacterial pathogens.
nhr-58	NA
cnc-10	cnc-10 encodes one of eleven C. elegans caenacin peptides.
Y66D12A.13	NA
lys-4	NA
lys-1	lys-1 encodes a putative lysozyme, whose overexpression increasesresistance to infection by Serratia marcescens; lys-1(RNAi) animals havenormal resistance to S. marcescens, perhaps because of geneticredundancy with the LYS-1 paralogs LYS-2 to -8 and LYS-10; in uninfectedanimals, LYS-1 is expressed in the intestine and in IL1/IL2 neurons,along with a few unidentified head neurons; in intestinal ce…
asp-13	NA
C17H12.8	NA
F13H10.6	NA
T17H7.7	NA
cbp-2	NA
acl-12	NA
skr-3	skr-3 encodes a homolog of Skp1 in S. cerevisiae; skr-3 transcripts are upregulated in response to pathogenic bacteria, and skr-3(RNAi) results in enhanced susceptibility to infection.
gst-9	gst-9 encodes a predicted glutathione S-transferase; by homology, GST-9 is predicted to play a role in the detoxification of environmental toxins and xenobiotics by transferring glutathione to reactive electrophilic compounds; however, as loss of gst-9 activity via large-scale RNAi screens does not result in any obvious abnormalities, the precise role of GST-9 in C. elegans development and/or beh…
cebp-1	cebp-1 encodes a bZip domain-containing protein that is a member of the CCAAT/enhancer-binding proteins (C/EBP) subfamily of bZip proteins; in C. elegans, CEBP-1 functions together with a DLK-1 signaling pathway to effect axon regeneration after laser axotomy in adult neurons; cebp-1 protein and mRNA are located in synapses and axons, and translation of axonal cebp-1 mRNA is upregulated via the D…
suro-1	NA
E04F6.6	NA
col-98	NA
C02E7.7	NA
pqn-60	pqn-60 encodes a 154-residue, glutamine/asparagine (Q/N)-rich('prion'-like) protein, predicted to have coiled-coil structure, withmany paralogs in nematodes but no obvious non-nematode orthologs; PQN-60inhibits CEP-1- and HUS-1-dependent germline apoptosis, as do BMK-1,RAD-50, and RAD-51.
abu-15	The protein product of this gene is predicted to contain a glutamine/asparagine (Q/N)-rich ('prion') domain, by the algorithm of Michelitsch and Weissman (as of the WS77 release of WormBase, i.e., in wormpep77).
pbo-4	pbo-4 encodes a Na+/H+ ion exchanger (NHE) most closely related to mammalian NHE1 that promotes extracellular acidification (and intracellular alkalinization) by catalyzing the electroneutral exchange of one extracellular Na+ ion for one intracellular H+ ion; in C. elegans, PBO-4 functions cell autonomously in the intestine to regulate normal posterior body wall muscle contractions (pBoc) during …
col-186	NA
T05A7.1	NA
zip-2	zip-2 encodes a bZIP transcription factor; ZIP-2 activity is required for regulating one branch of the immune response pathway that responds to infection by virulent strains of the bacterial pathogen Pseudomonas aeruginosa; specifically, ZIP-2 is required for inducing expression of a subset of infection response genes, including irg-1 and irg-2, and for full resistance to P. aeruginosa infection.
F08B12.4	NA
clec-10	NA
C44H9.5	NA
T28H10.3	NA
abu-11	abu-11 encodes a transmembrane protein with a predicted signal sequence, a glutamine/asparagine-rich domain and multiple cysteine-rich repeats (DUF139); abu-11 expression is induced by blockage of the unfolded-protein response in the endoplasmic reticulum, and ABU-11 may help protect the organism from damage by improperly folded nascent protein.
F55B11.4	NA
nspb-1	NA
acox-1.3	NA
T22F7.1	NA
F13D12.3	NA
K08B5.1	NA
B0281.3	NA
Y69A2AL.2	NA
Y54G2A.36	NA
R05G6.10	NA
nlp-31	nlp-31 encodes five predicted neuropeptide-like proteins; in C. elegans, nlp-31 is part of the YGGWamide neuropeptide family that also contains nlp-24, nlp-25, and nlp-27-32; nlp-31 is expressed in the hypodermis, and its expression is also detected in precomma-stage embryos; nlp-31 expression is upregulated in response to fungal infection and, when synthesized in vitro, demonstrates antifungal a…
dcar-1	NA
ugt-66	NA
E03H4.8	E03H4.8 encodes one of two C. elegans proteins with similarity to the beta' coat protein of the COPI vesicular coat; by homology, E03H4.8 is required for retrograde trafficking from the cis-Golgi to the endoplasmic reticulum and trafficking within the Golgi stack; in C. elegans, RNAi experiments indicate that E03H4.8 is required for proper germ cell development and reproduction; about 10% to 20% …
icl-1	icl-1 encodes a predicted isocitrate lyase/malate synthase, an enzyme known to function in the glyoxylate cycle; ICL-1 was identified in a screen for proteins that interact with GEX-3, a homolog of human HEM-2 which is required for embryonic development; ICL-1 appears to act downstream of DAF-16 to influence lifespan.
Y37E11AM.4	NA
F47B8.2	NA
acs-2	acs-2 encodes an acyl-CoA synthetase; by homology, ACS-2 is predicted to catalyze conversion of a fatty acid to Acyl-CoA for subsequent beta oxidation; accordingly, loss of acs-2 activity via RNAi results in defects in fat metabolism; an ACS-2::GFP reporter fusion protein is widely expressed and appears to localize to mitochondria; acs-2 expression is positively regulated by the NHR-49 nuclear ho…
W01B11.6	NA
nhr-202	NA
T01D1.4	NA
ttc-36	NA
let-653	let-653 encodes a mucin-like protein similar to the highly glycosylated mucins secreted by the apical surface of epithelia and believed to provide a protective barrier to exposed cellular surfaces; LET-653 is required for viability, locomotion, and for maintaining the tubular epithelial structure of the excretory cell canals.
glc-1	glc-1 encodes the alpha subunit of a glutamate-gated chloride channel and forms a functional channel in Xenopus oocytes; mutations genetically interact with avr-14 and avr-15 mutations such that triple mutants exhibit high level resistance to ivermectin.
grl-4	grl-4 encodes a hedgehog-like protein, with an N-terminal signalsequence, a central proline-rich low-complexity region, and a C-terminalGround-like (Grl) domain; GRL-4 is expressed in pharynx, reproductivesystem, vulva, larval neurons, and larval rectal epithelium; the Grldomain is predicted to form a cysteine-crosslinked protein involved inintercellular signalling, and it has subtle similarity t…
ZK550.6	The ZK550.6 gene encodes an ortholog of the human gene PHYTANOYL-COA HYDROXYLASE (PHYH; PAHX; OMIM:602026), which when mutated leads to Refsum disease (OMIM:266500).
F25E5.5	This gene encodes a protein containing an F-box, a motif predicted to mediate protein-protein interactions either with homologs of yeast Skp-1p or with other proteins.
ugt-7	NA
B0034.1	NA
ZC443.3	NA
hrg-1	hrg-1 encodes a transmembrane protein that is orthologous to vertebrate heme transporters;in C. elegans, hrg-1 functions to mediate heme homeostasis, likely by regulatingintracellular heme availability from endosomal or lysosomal-like compartments; HRG-1 exhibits pH-dependent heme binding in vitro and when expressed in Xenopus oocytes, can stimulate heme-dependent currents; an hrg-1::gfp promoter…
Y37E11AM.3	Y37E11AM.3 encodes an ortholog of Rpp14, a protein subunit of theendoribonuclease RNAse P, which cleaves tRNA precursors to producetheir mature 5' end.
col-107	NA
T19C4.5	NA
W02D9.10	NA
cpr-3	NA
clec-84	NA
W05H9.1	NA
gtl-2	gtl-2 encodes a predicted receptor-activated calcium channel and represents a family of calcium channels, the other two family members being gtl-1 and gon-2.
M153.1	NA
F09F7.6	NA
F43C11.7	NA
hic-1	T28B4.4 encodes a claudin homolog that may be required for normal cohesion of apical junctions in epithelia; T28B4.4 is worm-specific, weakly similar to CLC-1; T28B4.4 has no obvious function in mass RNAi assays; claudins are integral membrane proteins with four transmembrane sequences that are found in mammalian tight junctions (TJs), induce TJs when transgenically expressed in cells normally la…
col-42	NA
clec-173	NA
epg-9	epg-9 encodes the C. elegans homolog of mammalian ATG101 (AuTophaGy101); in C. elegans, epg-9 is required for autophagic degradation of protein aggregates and for normal survival rates under conditions of food deprivation; EPG-9 physically interacts with ATG-13, the C. elegans homolog of ATG13, and UNC-51, the C. elegans homolog of ATG1; an EPG-9::GFP reporter fusion is ubiquitously expressed dur…
col-170	NA
cah-3	cah-3 encodes a putative carbonic anhydrase, closely similar to itsparalog CAH-5; cah-3 is expressed in intestine and head (includingneurons) of L3 larvae through adults, and its transcription ismoderately stimulated by DBL-1 and SMA-2; CAH-3 is bound by CKU-80 intwo-hybrid assays, but has no obvious function in mass RNAi assays.
C44E12.1	NA
Y57G11C.42	NA
C18E9.5	NA
srsx-34	NA
mef-2	mef-2 encodes a transcription factor that is the sole C. elegans member of the MEF2 subgroup of MADS box transcription factors; loss of mef-2 activity does not result in a strong visible phenotype, although mef-2 mutant adults are slightly dumpy (Dpy); in vitro, MEF-2 is able to bind a consensus MEF2 DNA binding site and interact with the class II histone deacetylase encoded by C10E2.3 (hda-4/hda…
pqm-1	pqm-1 encodes a C2H2-type zinc finger and leucine zipper-containing protein that is upregulated in response to oxidative stress induced by paraquat treatment; PQM-1 may function as a stress-responsive transcription factor.
ubc-8	NA
C16D9.1	NA
F49B2.6	NA
hsp-43	hsp-43 encodes a member of the hsp20 family.
ZC204.12	NA
F32A5.4	NA
Y37A1A.2	NA
B0303.11	NA
lec-6	lec-6 encodes a 'proto' type galectin (beta-galactosyl-binding lectin) containing a single carbohydrate recognition domain; by homology, LEC-6 may play roles in cell adhesion and aggregation, proliferation, or programmed cell death, but as loss of lec-6 activity via large-scale RNAi screens does not result in obvious abnormalities, the precise role of LEC-6 in C. elegans development and/or behavi…
col-154	NA
B0416.7	NA
DH11.2	NA
ctl-3	ctl-3 encodes one of three C. elegans catalases; CTL-3 is predicted to function as an antioxidant enzyme that protects cells from reactive oxygen species; a ctl-3 promoter gfp fusion construct is expressed in pharyngeal muscles and neuronal cell bodies; loss of ctl-3 activity via RNAi results in no obvious abnormalities.
tyr-2	NA
asp-6	aspartic protease.
lgc-22	NA
tir-1	tir-1 encodes a Toll-Interleukin 1 Receptor (TIR) domain adaptor protein that is the C. elegans ortholog of human SARM (sterile alpha and armadillo repeats); tir-1 is required for innate immunity, as loss of tir-1 activity results in increased susceptibility to infection; tir-1 also functions in a lateral signaling pathway that specifies neuronal identity and is required for proper localization o…
C38C3.8	NA
M04C3.1	NA
cdf-2	cdf-2 encodes a protein similar to members of the cation diffusion facilitator (CDF) family of transmembrane proteins and is most similar to vertebrate ZnT-2; two other elegans CDF proteins, cdf-1 and sur-7 have also been identified; CDF proteins regulate the transport of heavy metal ions like zinc; cdf-2 responds to dietary zinc as cdf-2 transcript levels can be correlated with dietary zinc conc…
sul-3	sul-3 is orthologous to the human gene ARYLSULFATASE B (ARSB; OMIM:253200), which when mutated leads to mucopolysaccharidosis type VI.
T10B10.8	NA
ugt-54	NA
ZK596.1	NA
F59B1.2	NA
zipt-2.1	NA
twk-34	NA
D2030.2	NA
vap-2	NA
F53A9.6	NA
clec-49	clec-49 encodes a protein containing two calcium-dependent (C-type) lectin domains; by sequence analysis, CLEC-49 is predicted to be a secreted protein that binds carbohydrates; the Toxocara canis (canine roundworm) TES-32 protein, for which CLEC-49 is one of the most closely related C. elegans proteins, has been shown to reside in the parasite epicuticle and, in vitro, binds both galactose- and …
F56C11.6	NA
cpg-8	cpg-8 encodes, by alternative splicing, two putatively secreted smallproteins of 115 and 99 residues; the large CPG-8 isoform has 6 potentialchondroitin attachment sites, 5 of them verified by mass spectrometry;CPG-8 has no obvious function in mass RNAi assays.
F13H6.3	NA
col-38	col-38 encodes a member of the collagen superfamily containing collagen triple helix repeats (20 copies) required for normal body morphology.
ZK593.3	NA
ptr-12	ptr-12 encodes a nematode-specific member of the sterol sensing domain(SSD) proteins, distantly paralogous to Drosophila PATCHED (PTC) andhuman PTCH (OMIM:601309, mutated in basal cell nevus syndrome); PTR-12is weakly required for normal molting from L4 to adult stages growth tofull size; PTR-12 is also required for normal locomotion.
ttr-18	NA
ivns-1	NA
F43G6.8	NA
alh-4	NA
npa-1	npa-1 encodes a large polyprotein precursor that is posttranslationally cleaved to multiple units of ~14.5kDa, each of which is a strong binding protein for fatty acids and retinol (Vitamin A); the lipid binding sites of NPA-1-derived peptides are unusually apolar; NPA-1-derived peptides probably are carrier proteins that enable distribution of these lipids within nematodes; NPA-1-derived peptide…
clec-85	NA
zipt-16	NA
K10H10.4	NA
clec-62	NA
R06C1.6	NA
Y54G2A.45	NA
daf-5	daf-5 is an ortholog of human SKOR1 (SKI family transcriptional corepressor 1) and SKOR2 (SKI family transcriptional corepressor 2); daf-5 is involved in dauer entry, determination of adult lifespan, lipid storage, negative regulation of transcription from RNA polymerase II promoter, positive regulation of dauer larval development and transforming growth factor beta receptor signaling pathway; da…
ugt-24	NA
F38E9.1	NA
acox-1.6	NA
sago-2	sago-2 encodes an Argonaute homolog that is partially required for theamplification phase of RNAi responses; a multiply mutant strain (MAGO),consisting of ppw-1(tm914), sago-1(tm1195), sago-2(tm894),F58G1.1(tm1019), C06A1.4(tm887), and M03D4.6(tm1144) alleles, iscompletely resistant to both germline and somatic RNAi; sago-2 isgenetically redundant with ppw-1 and sago-1, with any one of these gene…
C25E10.8	C25E10.8 encodes a putative secreted TIL-domain protease inhibitorparalogous to SWM-1, ISL-1, and the products of 11 other C. elegansgenes; C25E10.8 and its relatives are collectively similar to otherTIL-domain protease inhibitors from nematodes, insects, and vertebrates;despite both swm-1 and C25E10.8 being mutated by the swm-1(ok1193)deletion, transgenic rescue of swm-1(ok1193) by SWM-1 alone l…
F20D1.3	NA
C02D5.4	NA
T28B8.1	NA
pgp-10	pgp-10 encodes an ATP-binding protein that is a member of the P-glycoprotein subclass of the ATP-binding cassette (ABC) transporter superfamily; PGP-10 is predicted to function as a transmembrane protein that couples energy to transport of various molecules across membranes, but as loss of pgp-10 activity via RNAi results in no obvious defects, the exact role of pgp-10 in C. elegans development a…
ZK822.2	NA
C01B4.7	NA
Y19D10A.4	NA
lys-8	lys-8 encodes a putative lysozyme required for normal longevity,probably because it prevents killing of C. elegans by bacteria infectingits gut; LYS-8 is expressed in intestine up to the terminal bulb of thepharynx, as well as in g1 and g2 pharyngeal gland cells; LYS-8expression is induced by infection with Serratia marcescens, Pseudomonasaeruginosa, or (weakly) by Microbacterium nematophilum; LY…
C39E9.8	NA
spp-23	NA
rgs-7	rgs-7 encodes three isoforms of an atypical regulator of G protein signaling (RGS) protein that contains both a C2 and an RGS domain, and that binds EGL-30 via both domains, similar in organization to mammalian PDZ-RGS3; the RGS domain has GTPase activator protein (GAP) activity in vitro on mammalian G[alphai]3; RGS-7 thus may stably bind EGL-30 at all stages of EGL-30's GTPase cycle, might organ…
timp-1	NA
Y39D8A.1	NA
clec-5	NA
fmo-4	fmo-4 encodes a flavin-containing monoxygenase homologous to human FMO1, FMO2, and FMO3 (OMIM:602079, mutated in trimethylaminuria).
W03D8.10	NA
T20B3.1	NA
nhr-41	nhr-41 encodes a nuclear receptor of the NR2D1 subfamily that is orthologous to the Drosophila DHR78 nuclear receptor essential for the onset of metamorphosis, and the mammalian TR2 and TR4 receptors which are expressed in androgen-sensitive organs and brain tissue, respectively; by homology, NHR-41 likely functions as a transcription factor that, based upon RNAi experiments, plays a role in the …
C36F7.5	NA
hpo-15	NA
T01D3.6	NA
C35C5.8	NA
F53C11.3	NA
Y53F4B.45	NA
M05B5.4	The M05B5.4 gene encodes an ortholog of the human gene LECITHIN-CHOLESTEROL ACYLTRANSFERASE (LCAT; OMIM:606967), which when mutated leads to lecithin-cholesterol acyltransferase deficiency (OMIM:245900).
nhr-97	NA
sod-4	sod-4 encodes an extracellular Cu2+/Zn2+ superoxide dismutase (SOD) that is one of five C. elegans SOD enzymes; genetic analyses indicates that sod-4 is required for redox regulation of a number of processes including axon pathfinding in the PVQ interneurons, insulin/IGF-1 signaling, and vulval development; large-scale expression studies indicate that sod-4 is expressed in the nervous system, int…
F14H12.3	NA
C09F12.2	NA
C33D9.3	NA
F54C9.3	NA
acdh-7	NA
dhs-21	dhs-21 encodes a member of the short-chain dehydrogenases/reductases family (SDR) expressed in the intestine, hypodermis, uterus, and spermatheca.
col-77	col-77 encodes a cuticular collagen; as loss of col-77 activity via RNAi screens results in no obvious defects, the precise role of col-77 in C. elegans development and/or behavior is not yet known.
nhx-9	NA
ugt-26	NA
acox-3	NA
ZK1073.1	NA
Y43F8C.3	NA
F37B12.1	NA
vpat-1	NA
F48D6.4	NA
pqn-54	The protein product of this gene is predicted to contain a glutamine/asparagine (Q/N)-rich ('prion') domain, by the algorithm of Michelitsch and Weissman (as of the WS77 release of WormBase, i.e., in wormpep77).
F18G5.6	NA
B0546.4	NA
Y32F6B.1	NA
lec-8	lec-8 encodes a glycolipid-binding galectin; LEC-8 binds glycolipids and can inhibit Bacillus thuringiensis Cry5B from binding glycolipids; lec-8 mutants are more susceptible to Cry5B; lec-8 is expressed in the pharyngeal-intestinal valve, the intestinal-rectal valve, and in some vesicles of the intestine; lec-8 expression in the intestine is induced in response to bacterial infection and Cry5B, …
H06A10.1	NA
E04F6.9	NA
C48E7.1	NA
col-13	col-13 encodes a collagen which is expressed in all stages of development, like sqt-3 (col-1), col-3, col-10, col-11, col-12, and col-14; collagen genes with this expression profile may be specifically required to construct the L1 cuticle (and, perhaps, less specifically required for cuticles at other stages); the amino- and carboxyl-terminal cysteine-rich regions of COL-13 are most closely relat…
cnp-3	NA
C02F12.5	C02F12.5 encodes a putatively secreted protein with a Kunitz/bovine pancreatic trypsin inhibitor domain; C02F12.5 has no obvious function in mass RNAi assays.
nhr-88	NA
Y51H4A.24	NA
F45E1.4	NA
cpt-1	Y46G5A.17 is orthologous to the human gene SIMILAR TO CARNITINE PALMITOYLTRANSFERASE I, LIVER (CPT1A; OMIM:600528), which when mutated leads to disease.
prk-2	NA
abu-14	The protein product of abu-14 is predicted to contain a glutamine/asparagine (Q/N)-rich ('prion') domain; abu-14 is transcriptionally up-regulated during times of cuticle synthesis, such as in late embryogenesis and in the molts; it is localized to the pharyngeal cuticle and is required for the function of the pharyngeal grinder.
camt-1	T05C1.4 encodes, by alternative splicing, two members of the CAMTAfamily of calmodulin-binding transcriptional activators that arerequired for embryonic development; CAMTA proteins are conserved inanimals and plants but absent from unicellular eukaryotes, and may thusrepresent a transcriptional activator specific to multicellularorganisms; the common organization of CAMTA proteins is to have twoN…
pbo-1	pbo-1 encodes a calcium binding protein with homology to calcineurin; pbo-1 was identified in screens for mutations that disrupt the normal defecation cycle; a pbo-1 mutation results in weak or absent posterior body contractions, the first step in the defecation cycle; pbo-1 mutant animals are also slow growing and constipated.
pqn-72	The protein product of this gene is predicted to contain a glutamine/asparagine (Q/N)-rich ('prion') domain, by the algorithm of Michelitsch and Weissman (as of the WS77 release of WormBase, i.e., in wormpep77).
spp-1	spp-1 encodes a caenopore, a saposin (B) domain-containing protein that is a member of the saposin-like protein (SAPLIP) superfamily containing mammalian NK-lysin and granulysin and the protozoan amoebapore-like proteins; SPP-1 exhibits antibacterial activity in vitro and its expression in vivo is regulated by the DAF-2/insulin receptor signaling pathway and by the presence of bacterial pathogens…
mlk-1	NA
R05D7.5	NA
Y45G5AM.3	NA
jmjd-3.1	jmjd-3.1 encodes, by alternative splicing, two isoforms of a histone H3 trimethyllysine-27 (H3K27me3) demethylase that is required for normal gonad migration and organization; JMJD-3.1 demethylates H3K27me3 in vitro; JMJD-3.1 contains an N-terminal TonB domain and a C-terminal JmjC domain, and is homologous to human JMJD3, UTX (OMIM:300128), and UTY (OMIM:400009); null jmjd-3.1(gk384) and jmjd-3.…
tpra-1	NA
F28H1.1	NA
Y39G10AR.11	NA
F42G4.6	F42G4.6 encodes a nematode-specific sperm protein; F42G4.6 has no obvious non-nematode homologs, but does have a putative central coiled-coil domain, and is is paralogous to four other C. elegans proteins (B0207.11, F42G4.6, F44F4.10, T08G11.2, and Y81G3A.1); F42G4.6(RNAi) animals exhibit aldicarb resistance; F42G4.6 expression is enriched in spermatogenesis.
mop-25.1	mop-25.1 encodes a protein orthologous to fission yeast Mo25p, budding yeast Hym1p, Aspergillus nidulans HymA, human CAB39, and human CAB39L; MOP-25.1 is paralogous to MOP-25.2 and (more distantly) MOP-25.3; MOP-25.1 shares a redundant function with MOP-25.2 in fertility and embryonic viability.
nhr-117	NA
T27E4.7	NA
B0310.2	NA
grd-6	grd-6 encodes a hedgehog-like protein, with an N-terminal signalsequence, a central low-complexity proline-rich domain, and a C-terminalGround domain; GRD-6 is expressed in hypodermis and in various neurons,in both head and tail, and the PVT interneuron; the Ground domain ispredicted to form a cysteine-crosslinked protein involved inintercellular signalling, and it has subtle similarity to the N-…
Y57G11A.4	NA
spch-2	spch-2 encodes one of three C. elegans small, highly basic proteins that have similarity to mouse testis-specific histone H1, the human nucleotide-binding and splicing-associated protein SON, and the mollusk protamine-like SNBPs (sperm nuclear basic proteins); SPCH-2 associates specifically with spermatogenic meiotic and mature sperm chromatin.
srj-14	NA
T21H3.1	NA
T10G3.3	NA
K10D6.2	K10D6.2 encodes three isoforms of a claudin homolog that may be required for normal cohesion of apical junctions in epithelia; K10D6.2A-C are worm-specific, with obvious homologs only in C. elegans; K10D6.2A-C are required for embryonic viability in mass RNAi assays; claudins are integral membrane proteins with four transmembrane sequences that are found in mammalian tight junctions (TJs), induce…
brp-1	brp-1 encodes a glutamine-rich protein that is conserved in nematodes, but that has no known homologies or sequence motifs; BRP-1 is able to bypass the need for the S. cerevisiae mating pheromone MAP kinase cascade to activate the mating pheromone-responsive gene FUSl.
col-166	NA
T28F4.5	The T28F4.5 gene encodes a homolog of Death Associated Protein 1 (DAP-1) protein that may be involved in apoptosis.
F37C4.5	NA
spp-2	spp-2 encodes an antimicrobial peptide that belongs to the SPP-protein family, called caenopores, with structural similarity to saposin-like proteins (SAPLIPs), the amoebapores and the mammalian NK-lysin and granulysin; caenopores are part of the worm's innate immune system and interact with and eliminate bacteria via membrane pore-forming activity; C. elegans has at least 33 putative SPP protein…
Y4C6B.2	NA
ptr-8	ptr-8 encodes a nematode-specific member of the sterol sensing domain(SSD) proteins, distantly paralogous to Drosophila PATCHED (PTC) andhuman PTCH (OMIM:601309, mutated in basal cell nevus syndrome); PTR-8 isweakly required for normal molting from L4 to adult stages; PTR-8 isalso required for normal growth to full size and locomotion; PTR-8 isexpressed in hypodermis.
Y8A9A.2	NA
abf-6	abf-6 encodes a homolog of the antibacterial factor ASABF from Ascaris suum; ABF-6 may play a role in innate immunity, though at present the only evidence for its having an antimicrobial humoral function is its sequence similarity.
F10D11.6	NA
T28F3.8	NA
drd-5	NA
clec-186	NA
C17F4.7	NA
nep-1	ZK20.6 encodes a neprilysin; neprilysins are thermolysin-like zinc metallopeptidases, found on the outer surface of animal cells, that negatively regulate small signalling peptides (e.g., enkephalin, tachykinin, insulin, and natriuretic peptides) by cleaving them; ZK20.6 is closely paralogous to F18A12.8, and orthologous to CG9761 in Drosophila melanogaster; more generally, ZK20.6 falls into a gr…
sod-1	sod-1 encodes the copper/zinc superoxide dismustase, an enzyme that is known to protect cells from oxidative damage; superoxide dismutase activity can be detected in worm extracts; sod-1 activity has been implicated in the increased life-span of dauer larvae where this enzyme demonstrates the highest activity compared to other life-stages as well as in the increased life span of age-1 mutants and…
atg-2	atg-2 encodes a large (2,275-residue) protein orthologous to theautophagic budding yeast protein Atg2p, and to human ATG2A and ATG2B;ATG-2 is expressed in larval and adult pharynx, intestine, body wall muscles, and neurons, as well as adult reproductive system; ATG-2 has noobvious phenotype in mass RNAi assays.
wago-10	NA
mnk-1	mnk-1 encodes the C. elegans ortholog of the Mnk MAP kinase-interacting kinase
ZK673.1	NA
aex-5	an ortholog of calcium-dependent serine endoproteinases, the kex2/subtilisin-like proprotein convertase that affects defecation cycle and anterior body contractions; and is expressed in all muscle cells except pharyngeal muscles.
sbp-1	sbp-1 encodes a basic helix-loop-helix (bHLH) transcription factor homologous to the mammalian Sterol Regulatory Element Binding Proteins (SREBPs, OMIM:184756, overexpression of nuclear form of SREBP-1c is associated with insulin resistance and features of congenital generalized lipodystrophy); in C. elegans, SBP-1 activity is required for normal lipid metabolism and wild-type levels of lipogenic…
clec-63	NA
col-145	NA
tos-1	NA
sulp-4	sulp-4 encodes one of eight C. elegans members of the sulfate permease family of anion transporters; by homology, SULP-4 is predicted to function as an anion transporter that regulates cellular pH and volume via transmembrane movement of electrolytes and fluids and when expressed in Xenopus oocytes, SULP-4 exhibits robust transport of sulfate and more modest transport of chloride ions and oxalate…
pqn-75	The protein product of this gene is predicted to contain a glutamine/asparagine (Q/N)-rich ('prion') domain, by the algorithm of Michelitsch and Weissman (as of the WS77 release of WormBase, i.e., in wormpep77).
Y17G7B.8	NA
spl-2	NA
M05D6.1	NA
unc-51	unc-51 encodes a serine/threonine protein kinase orthologous to Saccharomyces cerevisiae autophagy protein Atg1p and the vertebrate ULK proteins; unc-51 is required for axon outgrowth along the anterior-posterior axis and sex myoblast migration; in regulating axon outgrowth, UNC-51 functions together with the VAB-8 kinesin-like protein and UNC-14, both of which physically interact with, and are p…
C34D10.2	NA
col-10	NA
rhr-1	rhr-1 encodes an ortholog of human Rhesus blood-group associated glycoprotein (RHAG; OMIM:180297, mutated in chronic hemolytic anemia), a member of the ammonium transporter family, and affects general levels of mRNA transcripts, and embryonic viability in a large-scale RNAi screen.
col-60	NA
asp-12	NA
dod-19	NA
sqst-1	sqst-1 encodes a protein with similarity to mammalian sequestosome 1(SQSTM1)/p62, a signal transduction or adaptor protein involved in receptor-mediated signalling pathways; SQST-1 is weakly expressed in embryos and exhibits a diffuse, cytoplasmic localization; SQST-1 is selectively removed by autophagy during embryogenesis.
T27F6.8	This gene encodes a protein containing an F-box, a motif predicted to mediate protein-protein interactions either with homologs of yeast Skp-1p or with other proteins.
tyr-4	NA
sea-2	sea-2 encodes a zinc finger protein; SEA-2 is an autosomal signal element (ASE) that functions to interpret the X:A chromosomal ratio; in addition, SEA-2 functions autonomously in the intestine to regulate adult lifespan and autonomously in seam cells to regulate larval developmental timing; in regulating lifespan and developmental timing, SEA-2 functions as a post-transcriptional negative regula…
col-95	col-95 encodes a collagen.
col-168	NA
cpi-2	NA
F52E1.14	NA
mua-6	mua-6 encodes an essential intermediate filament protein (MUA-6/IFA-2) that is coexpressed with the essential IF protein IFB-1; MUA-6 is required for hypodermal integrity and for lasting attachment of muscles to the body wall; MUA-6 is also required for normal positioning of excretory canals and muscles; MUA-6 forms heteropolymeric intermediate filaments in vitro with an equimolar mixture of IFB-…
add-2	add-2 encodes a protein containing an alpha-adducin-like head domain that while highly similar in sequence to the head domain of vertebrate and Drosophila adducins, atypically resides at the C-, rather than N-, terminus of the protein; by homology, ADD-2 is predicted to be a cell membrane-associated cytoskeletal protein that mediates cytoskeletal rearrangements in response to activation of signal…
F21D12.3	NA
cysl-1	cysl-1 encodes a homolog of sulfhydrylases/cysteine synthases; CYSL-1 functions in neurons to transduce signals from H2S (hydrogen sulfide), which accumulates during hypoxia, to the EGL-9 proline hydroxylase to regulate O2-dependent behavioral plasticity in C. elegans via neuronal activation of the HIF-1 hypoxia-inducible transcription factor.; specifically, CYSL-1 physically interacts with EGL-9…
tps-1	NA
gba-1	NA
Y38H8A.3	NA
col-34	col-34 encodes a cuticle collagen protein and is a critical component of male tail cuticle organization affecting ray morphology.
irg-5	NA
Y37A1A.3	NA
toh-1	toh-1 encodes an astacin-like metalloprotease; TOH-1 is predicted to function as a secreted protease; experiments that specifically assessed toh-1's role in molting indicate that toh-1(RNAi) causes no abnormal phenotypes.
Y48A6B.9	NA
B0454.6	NA
sym-1	sym-1 encodes a protein containing 15 contiguous leucine-rich repeats (LRRs) that functionally overlaps with sym-5 and interacts with mec-8 with respect to embryonic viability and attachment of body muscle to the extracellular cuticle; expression begins at the time of embryonic elongation and SYM-1 is secreted from the apical hypodermal surface of the embryo; microarray analyses indicate that sym…
Y15E3A.4	NA
faah-2	NA
endu-1	NA
maoc-1	maoc-1 encodes an ortholog of human HSD17B4 (OMIM:601860, mutated in D-bifunctional protein deficiency); MAOC-1 contains a MaoC-like domain found in diverse enzymes (HSD17B4, peroxisomal hydratase-dehydrogenase-epimerase, and the fatty acid synthase beta subunit) and by homology, is predicted to function in peroxisomal fatty acid beta-oxidation; loss of maoc-1 activity via RNAi results in lifespa…
lea-1	The lea-1 gene encodes a protein that is predicted to be hydrophilic and heat-resistant, and that might participate in anhydrobiosis.
lgg-2	lgg-2 encodes an ortholog of the autophagic budding yeast protein Atg8p;LGG-2 is also homologous the light chain 3 (LC3) subunit of themicrotubule-associated proteins 1A and 1B (MAP1A and MAP1B); LGG-2 is predicted to associate with MAP1A and MAP1B and with microtubules and toperhaps play a role in regulating the microtubule-binding activity ofMAP1A and MAP1B; LGG-2 has no obvious function in RNA…
dgat-2	NA
acs-17	NA
F32B5.6	NA
Y52B11A.8	NA
Y50D4B.1	NA
col-130	NA
col-88	NA
lgg-1	lgg-1 encodes the C. elegans ortholog of Saccharomyces cerevisiae Atg8p and mammalian MAP-LC3; by homology, LGG-1 is predicted to be required for the degradation of cellular components by autophagy; loss of lgg-1 function via RNAi indicates that, like several other C. elegans genes involved in autophagy, lgg-1 is essential for normal dauer morphogenesis and life-span extension; a GFP::LGG-1 repor…
Y37D8A.16	NA
C53D6.7	NA
ttr-32	R13A5.3 encodes a protein containing a predicted signal sequence followed by a transthyretin-like domain; although the product of R13A5.3 belongs to a family of apparently nematode-specific proteins whose function is not yet known, loss of R13A5.3 activity via RNAi has been reported to result in hyperactive locomotion.
rimb-1	rimb-1 encodes the C. elegans ortholog of the vertebrate RIM-BP2 RIM (Rab3-interacting protein) binding proteins; rimb-1 is expressed pan-neuronally.
C05D10.4	NA
dhrs-4	dhrs-4 encodes a member of the short-chain dehydrogenase/reductase (SDR) family; by orthology to human DHRS4, C. elegans DHRS-4 is predicted to function as a tetrameric, peroxisomal NADPH-dependent carbonyl-reductase that acts on a large and diverse set of small molecule substrates.
cpl-1	cpl-1 encodes a member of the cathepsin L-like cysteine protease family required for embryonic viability and normal growth; expressed in eggshells and throughout early embryos, accumulates in intestinal cells during late embryogenesis, and expressed in the cuticle, gonad, and pharynx later in development.
soc-2	soc-2 encodes a leucine-rich repeat protein; soc-2 functions downstream in the let-60/Ras and egl-15/FGF receptor signaling pathways to positively and negatively regulate signaling through these pathways, respectively, and thus affect such processes as vulval development, osmoregulation, and muscle membrane extension; consistent with its role in regulating Ras-mediated signal transduction, SOC-2 …
sup-26	sup-26 encodes an RRM domain-containing protein; SUP-26 functions in somatic sex determination via negative regulation of tra-2 translation; SUP-26 binds the tra-2 28-nucleotide repeat element known as the TRA-2/GLI element (TGE), which is located in tra-2 3';untranslated region (UTR); SUP-26 physically interacts with the poly(A)-binding protein PAB-1, suggesting that it may control tra-2 transla…
Y119D3B.13	NA
F56D5.6	NA
tbc-7	NA
col-3	col-3 encodes a collagen protein that affects body morphogenesis, larval viability, and locomotion in large scale RNAi screens; mRNA is expressed during all developmental stages examined (in embryos, during the L2 to dauer molt, during the dauer to L4 larval molt, and during the L4 to adult molt).
col-120	NA
sulp-8	sulp-8 encodes one of eight C. elegans members of the sulfate permease family of anion transporters; by homology, SULP-8 is predicted to function as an anion transporter that regulates cellular pH and volume via transmembrane movement of electrolytes and fluids; a SULP-8::GFP fusion is expressed in the basolateral membrane of the excretory cell, intestine, and rectal gland cells.
icmt-1	NA
col-125	NA
asp-5	NA
wht-4	NA
Y53H1B.2	NA
dlk-1	dlk-1 encodes a mitogen-activated protein kinase kinase kinase (MAPKKK) that is the C. elegans ortholog of the dual-leucine zipper MAPKKK; in C. elegans, dlk-1 functions with mkk-4 and pmk-3 in a MAPK signaling pathway that regulates presynaptic development; dlk-1 is also essential for neuron regeneration; DLK-1 abundance is negatively regulated by the RPM-1 E3 ubiquitin ligase which can stimulat…
C30E1.9	NA
lec-4	lec-4 encodes a predicted galectin that exhibits sugar binding properties in vitro.
dod-23	NA
pqn-83	The protein product of this gene is predicted to contain a glutamine/asparagine (Q/N)-rich ('prion') domain, by the algorithm of Michelitsch and Weissman (as of the WS77 release of WormBase, i.e., in wormpep77).
C25E10.5	NA
Y48G1BR.1	NA
ttr-44	NA
clec-80	NA
43252	jun-1 encodes a basic-leucine zipper (bZIP) transcription factor that is the C. elegans JUN homolog; jun-1 activity is essential for regulation of ovulation, and thus normal levels of fertility; in regulating ovulation, JUN-1 functions with FOS-1 to regulate expression of plc-1 which encodes a phospholipase C essential for IP3 production and ovulation; in addition, JUN-1 interacts with FOS-1 in v…
B0334.3	NA
F09C3.2	NA
vab-19	vab-19 encodes an ankyrin repeat-containing protein that is a member of a conserved family of proteins that includes human Kank, a predicted tumor suppressor; during embryonic morphogenesis, vab-19 activity is essential for epidermal elongation and proper attachment of muscle to the epidermis, specifically the localization of attachment structures to muscle-adjacent regions of epidermal cells and…
nkb-3	NA
ptr-23	ptr-23 encodes a nematode-specific member of the sterol sensing domain (SSD) proteins, distantly paralogous to Drosophila PATCHED (PTC) and human PTCH (OMIM:601309, mutated in basal cell nevus syndrome); PTR-23 is strongly required for normal molting from L4 to adult stages (a role conserved in C. briggsae); PTR_23 also functions in a pathway with the mucin-like protein OSM-8 to regulate the osmo…
mca-2	mca-2 encodes a calcium-transporting ATPase; large-scale RNAi screens indicate that mca-2 activity is required for locomotion and normal rates of postembryonic growth.
Y92H12A.2	NA
pfas-1	NA
T16G1.7	NA
col-76	NA
scrm-5	scrm-5 encodes a putative phospholipid scramblase homologous to humanPLSCR1-5, and paralogous to other C. elegans SCRMs (e.g., SCRM-1);scrm-5(RNAi) animals have no obvious phenotype.
pho-7	NA
M176.4	NA
acdh-10	T08G2.3 is orthologous to the human gene ACYL-CoA DEHYDROGENASE, MEDIUM-CHAIN (ACADM; OMIM:607008), which when mutated leads to MCAD deficiency.
C05C8.7	NA
ZK6.11	NA
C49C3.9	NA
F26A3.4	NA
feh-1	feh-1 encodes the single C. elegans member of the Fe65 protein family that affects embryonic and larval viability and pharyngeal pumping; the PTB2 domain binds to cytosolic domain of C. elegans APL-1 in vitro; expressed in the neuromuscular structures of the pharynx and in a subset of neurons.
lem-3	lem-3 encodes a protein containing ankyrin repeats, a LEM (LAP2-emerin-MAN1) domain and a GIY-YIG nuclease domain; C. elegans has three LEM domain proteins, EMR-1, LEM-2 and LEM-3, also conserved in mammals; the LEM domain binds to a conserved metazoan chromatin protein BAF (Barrier to Autointegration Factor); EMR-1 and LEM-2 bind LMN-1/lamin and BAF-1 and require lamin for their nuclear envelope…
ges-1	ges-1 encodes a gut-specific type B carboxylesterase; by homology, GES-1 hydrolyzes carboxylic ester substrates to yield an alcohol and a carboxylic anion, however, loss of GES-1 activity via mutation or RNAi does not result in any obvious abnormalities; GES-1 is expressed solely in the intestinal, or E, lineage from the 4 E-cell stage of gut development through adulthood; GES-1 contains a C-term…
zmp-3	NA
F19C7.1	NA
nep-23	Y116A8C.4 encodes a neprilysin; neprilysins are thermolysin-like zinc metallopeptidases, found on the outer surface of animal cells, that negatively regulate small signalling peptides (e.g., enkephalin, tachykinin, insulin, and natriuretic peptides) by cleaving them; Y116A8C.4 has no clear orthologs in other organisms.
ugt-44	NA
tag-260	NA
igcm-3	igcm-3 encodes protein containing an immunoglobulin-like domain; loss of igcm-3 activity via RNAi results in a moderate increase in fat content, suggesting that igcm-3 may play a role in regulating lipid metabolism.
B0304.4	NA
W06B4.2	NA
C52A10.1	NA
pho-11	NA
M117.4	NA
rcan-1	NA
hda-4	hda-4 encodes a class II histone deacetylase that contains a putative MEF-2 DNA binding domain, a nuclear localization signal domain, and a single catalytic domain and may affect locomotion, body morphology, and growth; interacts with MEF-2 in in vitro assays and is expressed in body-wall muscle, neurons, and hypodermal seam cells
F17H10.2	NA
Y48G9A.9	NA
Y73F4A.3	NA
F15A4.6	NA
H34I24.2	NA
hlh-30	hlh-30 encodes a predicted basic helix-loop-helix (bHLH) transcription factor, one of 42 such genes in the C. elegans genome, it is spliced to give 18 different transcripts; it is orthologous to human microphthalmia-associated transcription factor (HGNC:MITF); loss of hlh-30 activity via RNAi results in reduced fat storage; HLH-30 demonstrates sequence-specific DNA binding for the E box sequence …
asp-3	asp-3 encodes an aspartyl protease homolog that is required, in parallel with ASP-4 but downstream of CLP-1 and TRA-3, for degenerative (necrotic-like) cell death in neurons induced by mutations such as mec-4(d), deg-3(d), or gsa-1(gf).
hmit-1.1	hmit-1.1 encodes one of three C. elegans proton (H+)-dependent myo-inositol transporters; loss of hmit-1.1 activity via large-scale RNAi result in no obvious abnormalities but by homology, HMIT-1.1 is predicted to function as a plasma membrane protein required for the regulated uptake of myo-inositol and thus potentially for regulation of cell signaling and intracellular osmolarity.
W09D6.5	NA
spp-10	spp-10 encodes two protein isoforms that are orthologous to the human gene PROSAPOSIN (PSAP; OMIM:176801, mutated in Gaucher disease and metachromatic leukodystrophy); SPP-10A and -10B are predicted to have 3 and 4 embedded saposin sequences, that are likely to be split into individual saposin peptides by proteolysis; in mammals, saposins activate the enzymes sphingomyelinphosphodiesterase and be…
pqn-74	pqn-74 encodes a protein with two chitin-binding peritrophin-A domains,separated by a glutamine/asparagine (Q/N)-rich ('prion') domain; likeCEJ-1 and CPG-2, PQN-74 might participate in eggshell synthesis andearly embryonic development, and PQN-74's peritrophin-A domains mightenable mechanical cross-linking of chitin.
C05D12.3	NA
asp-1	asp-1 encodes a homolog of cathepsin D aspartic protease; it is transcribed exclusively in intestinal cells of the late embryo and early larvae and is not observed in older larvae or adults; ASP-1 is dispensable for neuronal degeneration.
nep-17	nep-17 encodes a neprilysin; neprilysins are thermolysin-like zinc metallopeptidases, found on the outer surface of animal cells, that negatively regulate small signalling peptides (e.g., enkephalin, tachykinin, insulin, and natriuretic peptides) by cleaving them; NEP-17 has no clear orthologs in other organisms.
T12B3.3	NA
fbxl-1	fbxl-1 encodes the sole C. elegans leucine-rich repeat (LRR)-type F-box protein that is equally related to mammalian FBXL2 and FBXL20; fbxl-1(RNAi) results in animals with altered defecation rhythm and decreased dauer formation upon treatment with dauer pheromone (daumone); an fbxl-1 promoter::gfp fusion is expressed in the anterior and posterior regions of the worm, specifically around the amphi…
ida-1	ida-1 encodes a protein tyrosine phosphatase-like receptor, orthologous to the mammalian type I diabetes autoantigens IA-2 and phogrin that are expressed in dense core vesicles of neuroendocrine tissue and involved in regulated protein secretion; in C. elegans, IDA-1 appears to be required for regulating presynaptic neurotransmission and in particular, for the neuropeptidergic control of egg-layi…
ZK484.7	NA
T27C4.1	NA
Y1A5A.1	NA
Y54E2A.9	NA
dhs-18	dhs-18 encodes a predicted short-chain dehydrogenase.
rop-1	rop-1 encodes an RNAi-binding protein that is orthologous to the vertebrate 60-kDa Ro autoantigen that is the protein component of the Ro ribonucleoprotein (RNP) complex; ROP-1 binds the single C. elegans Ro RNP RNA component, YRN-1 (Y RNA) in vivo and although loss of rop-1 activity via mutation results in no obvious visible phenotypes, it does result in a dramatic decrease in YRN-1 levels, indi…
fkh-7	fkh-7 encodes one of 15 forkhead transcriptional regulators encoded by the C. elegans genome; by homology, FKH-7 is predicted to function as a transcription factor that regulates gene expression during development; however, as loss of fkh-7 activity via RNA-mediated interference (RNAi) does not result in any obvious abnormalities, the precise role of FKH-7 in C. elegans development and/or behavio…
afd-1	NA
Y25C1A.13	NA
F18C5.10	NA
col-39	col-39 encodes a collagen that is individually dispensable for viability and gross morphology in mass RNAi screens; the amino- and carboxyl-terminal cysteine-rich regions of COL-39 are most closely related to those of COL-8, COL-19, and COL-35.
tth-1	tth-1 encodes a thymosin beta ortholog that contains four functionally distinct thymosin beta repeats; in vitro, TTH-1 binds multiple actin monomers as well as filamentous actin suggesting that, as its homology predicts, TTH-1 plays a direct role in regulating actin polymerization and cytoskeletal organization in C. elegans; consistent with this, loss of tth-1 activity via a deletion mutation tha…
asah-1	NA
F46G10.2	NA
Y47G6A.21	NA
Y66H1A.5	NA
hlh-11	NA
mboa-4	mboa-4 encodes a putative transmembrane O-acyl transferase (MBOAT) orthologous to human MBOAT1 (OMIM:611732), and paralogous to C54G7.2 and ZK550.1; MBOA-4 has no obvious function in mass RNAi assays, and mboa-4(RNAi) animals incorporate exogenous arachidonic acid into phosphatidylcholine (PC), phosphatidylserine (PS) and phosphatidylethanolamine (PE) normally.
F36A4.4	NA
ZK673.2	NA
ttr-34	NA
pho-4	NA
gst-36	NA
aqp-1	aqp-1 encodes, by alternative splicing, two isoforms of an aquaglyceroporin required for normally short lifespan; AQP-1 expression is upregulated under daf-2(-) conditions, and loss of AQP-1 function in daf-2 mutant animals results in reduced lifespan; AQP-1 increases glycerol permeability five- to seven-fold when expressed in Xenopus oocytes; AQP-1::GFP fusion proteins are expressed predominantl…
K07C11.7	K07C11.7 encodes one of three C. elegans metallophoshopesterase that are related to human 239FB, which is encoded by a gene in the 11p13-p14 chromosomal region associated with various tumors and WAGR (Wilms' tumor, aniridia, genitourinary anomalies, and mental retardation) syndrome.
F22B8.7	NA
F55G11.4	F55G11.4 encodes a protein containing a CUB-like domain conserved amongst nematodes; F55G11.4 expression is increased in response to bacterial infection, suggesting that it plays a role in the defense response.
tbc-14	NA
F35E12.6	NA
oac-46	T14D7.2 encodes an acyltransferase; large-scale RNAi experiments indicate that T14D7.2 activity is required for egg laying, coordination locomotion, and normal vulval morphology.
metr-1	metr-1 encodes a protein orthologous to the human gene Methionine synthase (MTR), which is involved in the conversion of homocysteine to form methionine.
col-144	NA
C55C3.3	NA
ZK228.4	NA
abts-1	abts-1 encodes a sodium-driven chloride-bicarbonate transporter; when expressed in Xenopus oocytes, ABTS-1 exhibits robust chloride transport, as well as chloride/bicarbonate exchange activity; abts-1 responds to arsenite in the environment with an increase in mRNA levels and is required for protection against toxicity of arsenite; abts-1 is involved in cholinergic signaling as abts-1 mutant worm…
M01H9.3	NA
F54D5.3	NA
C18D11.1	NA
clec-119	NA
tag-196	NA
cat-4	NA
M60.4	NA
F40G12.10	NA
ZK1320.2	NA
nac-3	nac-3 encodes a high affinity, sodium-coupled dicarboxylate transporter that is one of four C. elegans proteins related to Drosophila Indy and the mammalian NaDC1 and NaDC3 transporters; when expressed in a heterologous system, NAC-3 exhibits high affinity sodium/succinate cotransporter activity indicating that, functionally, NAC-3 is more closely related to mammalian NaDC3 than NaDC1; nac-3 mRNA…
col-150	NA
snt-4	NA
F16A11.1	NA
C17H11.6	NA
C18E9.8	C18E9.8 is orthologous to the human gene JOINED TO JAZF1 (JJAZ1; OMIM:606245), which when mutated leads to disease.
F42A10.7	NA
K12C11.1	The K12C11.1 gene encodes an ortholog of the human gene PEPTIDASE D (PEPD), which when mutated leads to prolidase deficiency (OMIM:170100).
plc-3	plc-3 encodes a phospholipase C gamma homolog; PLC-3 activity is required for regulation of a number of biological processes, including ovulatory sheath contractions, nose touch, behavioral quiescence, oscillatory Ca2+ signaling in the intestine, innate immunity, and response to wounding; plc-3 reporter fusions are expressed in sheath cells and the spermatheca, the intestine, embryonic cells incl…
F22F7.7	NA
phat-4	NA
mrp-3	NA
W02B12.12	NA
ttr-59	NA
clec-83	NA
pod-1	The pod-1 gene encodes a coronin-like protein required for asymmetry along the anterior-posterior axis at the beginning of embryonic development.
dlg-1	dlg-1 encodes a MAGUK protein, orthologous to Drosophila Discs large; DLG-1 is physically located at apical adherens junctions in all epithelia and is required for organization of the embryonic gut epithelium into a coherent tube.
irg-4	F08G5.6 encodes a CUB-like domain-containing protein; F08G5.6 is involved in the transcriptional, innate immune response towards several different bacterial pathogens; an F08G5.6::gfp promoter fusion is expressed in the intestine and in head neurons; F08G5.6 expression is positively regulated in the intestine by the ELT-2 GATA transcription factor.
C34D4.2	NA
sipa-1	T27F2.2 encodes a homolog of human SIPA1/EHBP1L1 (OMIM:602180) and itsparalogs.
smp-1	smp-1 encodes a semaphorin; smp-1 activity is required for vulval morphogenesis, specifically for the movement of homologous pairs of vulval cells towards the vulval midline prior to cell fusion; smp-1 expression in vulval cells is regulated by the VAB-23 zinc-finger domain protein which binds smp-1 regulatory sequence in vivo.
msp-38	msp-38 encodes a member of the major sperm protein family; msp-38 has a C. briggsae homolog as predicted by the Wobble Bulk Aware Bulk Aligner (WABA).
Y17G7B.10	NA
ZK632.4	ZK632.4 is orthologous to the human gene PHOSPHOMANNOSE ISOMERASE (MPI; OMIM:154550), which when mutated leads to disease.
pqn-94	The protein product of this gene is predicted to contain a glutamine/asparagine (Q/N)-rich ('prion') domain, by the algorithm of Michelitsch and Weissman (as of the WS77 release of WormBase, i.e., in wormpep77).
cTel55X.1	NA
ZK550.2	NA
scav-2	Y76A2B.6 encodes a ortholog of human CD36 antigen (OMIM:173510, mutated in platelet glycoprotein IV deficiency); Y76A2B.6 is needed for cell corpse engulfment in the germline and in the three-fold embryo, and for migration of the anterior arm of the gonad.
Y49E10.10	NA
mpst-4	NA
ZK899.2	NA
dgk-2	dgk-2 encodes a putative diacylglycerol kinase.
cgp-1	NA
F58G1.3	NA
W10C8.5	NA
F21F3.6	NA
yap-1	yap-1 encodes a protein with sequence similarity to YAP (yes-associated protein) in its N-terminal TEAD-binding domain and WW domain; YAP-1 plays a role in the response to heat and in determination of adult life span; YAP-1 physically interacts with EGL-44, a transcription enhancer factor of the TEA domain (TEAD) class, and when co-expressed, the two proteins are able to activate a TEAD reporter;…
pqn-52	pqn-52 encodes, by alternative splicing, three proteins withglutamine/asparagine (Q/N)-rich ('prion') domains; at least one of theseisoforms bound KLC-2 in a mass yeast two-hybrid screen; PQN-52 proteinsare predicted to be secreted, and have no obvious homologs outside ofthe nematodes (e.g., Brugia malayi 14952.m01392).
cnp-2	NA
C05D2.8	NA
C53B7.3	NA
abts-4	abts-4 encodes an anion transporter; ABTS-4::GFP fusion proteins are expressed solely in the intestine, with highest levels seen in the most anterior and posterior gut cells and subcellular localization restricted to the basolateral membrane.
slrp-1	NA
nduo-6	The nduo-6 gene resides on the mitochondrial chromosome, and encodes the protein NADH-ubiquinone oxidoreductase chain 6; this is the C. elegans homolog of the core MT-ND6 of mitochondrial NADH:ubiquinone oxidoreductase (Complex I).
asp-2	asp-2 encodes aspartic protease.
obr-2	NA
sup-1	sup-1 encodes a novel, single-pass transmembrane protein; sup-1 was identified as an allele-specific dominant suppressor of unc-17(e245); unc-17 encodes a synaptic vesicle acetylcholine transporter and the e245 missense mutation results in substitution of arginine for glycine in the ninth transmembrane domain and reduced levels of UNC-17 protein; sup-1 is defined by several alleles that all behav…
T08B6.9	NA
mib-1	NA
ant-1.4	ant-1.4 encodes an ortholog of the human adenine nucleotide translocase ANT genes, the other ANT genes in C. elegans include ant-1.1, ant-1.2 and ant-1.3; phylogenetic analysis indicates that ant-1.4 is specific to C. elegans, resulting from a recent duplication following the speciation of the common ancestor of C. elegans, C. briggsae, and C. remanei; by homology, ANT-1.4 is predicted to mediate…
Y62E10A.13	NA
osm-7	osm-7 encodes a protein required for normal osmosensation, osmotic resistance, and defecation rhythm, and for fully normal growth rate; OSM-7 has no clear orthologs outside of nematodes, but is paralogous to DOS-1, OSM-11, and K02F3.7; OSM-7 is expressed in the hypodermis, has a predicted signal sequence with 12 conserved cysteine residues, and may be secreted; osm-7 mutants have abnormally high …
C36H8.1	NA
xbp-1	xbp-1 encodes a bZIP transcription factor orthologous to yeast Hac1 and mammalian X box-binding protein 1 (XBP-1, OMIM:194355); XBP-1 is required for the unfolded protein response (UPR) that counteracts cellular stress induced by accumulation of unfolded proteins in the endoplasmic reticulum (ER); xbp-1 mRNA is spliced by the IRE-1 endoribonuclease to promote translation of transcriptionally acti…
aman-1	aman-1 encodes an ortholog of human lysosomal mannosidase (MAN2B1;OMIM:609458, mutated in alpha-mannosidosis); AMAN-1 is predicted to helpdigest glycoproteins by removing mannose residues from their N-linkedoligosaccharides; AMAN-1 has seven predicted N-glycosylation sites;AMAN-1 is biochemically active in vitro, has optimal activity at pH4-4.5, and is unaffected by Co(II); however, AMAN-1 expres…
tat-4	tat-4 encodes one of six C. elegans subfamily IV P-type ATPase that, by sequence similarity, is proposed to function as an aminophospholipid translocase (flippase); loss of tat-4 function via RNAi or deletion mutation results in no obvious developmental or morphological defects, however tat-4 deletion mutants are hypersensitive to sterol deprivation and this hypersensitivity is enhanced by a muta…
K02D7.1	K02D7.1 is orthologous to the human gene PURINE NUCLEOSIDE PHOSPHORYLASE (NP; OMIM:164050), which when mutated leads to disease.
fshr-1	fshr-1 encodes a putative neuropeptide receptor required for normalacetylcholine secretion by synapses; FSHR-1 is orthologous to humanfollicle-stimulating hormone receptor (OMIM:136435; mutated in ovariandysgenesis), thyrotropin receptor (OMIM:603372; mutated inhyperthyroidism), and luteinizing hormone receptor (OMIM:152790, mutatedin precocious puberty); fshr-1 mutants have abnormally many GFP::…
ant-1.3	ant-1.3 encodes an ortholog of the human adenine nucleotide translocase ANT genes, the other ANT genes in C. elegans include ant-1.1, ant-1.2 and ant-1.4; by homology, ANT-1.3 is predicted to mediate the exchange of ATP generated in the mitochondria for cytosolic ADP; ANT-1.3 GFP fusion protein is expressed in the intestine and the anterior of the elongating embryo, and in a pair of head neurons …
F35E12.10	F35E12.5 encodes a CUB-like domain-containing protein; F35E12.5 is involved in the transcriptional, innate immune response towards several different bacterial pathogens.
mca-3	mca-3 encodes one of three C. elegans plasma membrane Ca2+ ATPases (PMCAs); by homology, MCA-3 is predicted to function as a molecular pump that couples ATP hydrolysis to extrusion of cytosolic Ca2+; mca-3 activity is required for coelomoycte endocytosis, normal coordinated locomotion, and embryonic and larval development; in regulating endocytosis, MCA-3 is required specifically in the early sta…
T08B6.4	NA
ppw-2	NA
spe-26	spe-26 encodes a Kelch motif-containing protein similar to the Drosophila proteins kelch and diablo and the Limulus (horseshoe crab) actin-bundling protein scruin; SPE-26 activity is required for several processes including embryogenesis, spermatogenesis, thermotolerance, and regulation of lifespan; SPE-26 mRNA is detected in spermatogonial cells and spermatocytes, but not in spermatids.
C35B1.5	NA
ifb-2	ifb-2 encodes an intermediate filament protein; IFB-2 is expressed exclusively in the intestine and functions as a structural component of the intestinal terminal web; within the terminal web, IFB-2 localizes to a discrete substructure known as the endotube.
F02D8.4	NA
F13D12.6	F13D12.6 is orthologous to the human gene SIMILAR TO PROTECTIVE PROTEIN FOR BETA-GALACTOSIDASE (GALACTOSIALIDOSIS) (PPGB; OMIM:256540), which when mutated leads to disease.
pgal-1	NA
ccg-1	NA
pcyt-2.1	NA
myo-2	myo-2 encodes a muscle-type specific myosin heavy chain isoform; myo-2 is expressed in pharyngeal muscle.
R11D1.1	NA
lim-8	lim-8 encodes proteins containing one PDZ and one LIM domain; in vitro binding and yeast two-hybrid assays indicate that LIM-8 can physically interact with myosin heavy chain A (MYO-3) as well as with UNC-96 and UNC-97, suggesting that LIM-8 is part of a structural component that links membrane attachment proteins to myosin thick filaments; lim-8(RNAi) in a hypersensitive rrf-3 background results…
T22C1.8	NA
pezo-1	NA
lact-3	lact-3 encodes a beta-lactamase domain-containing protein that contains a predicted signal sequence; loss of lact-3 activity via RNAi has been reported to result in reduced fat content.
T04H1.2	NA
R08E3.1	NA
F42A10.6	NA
eppl-1	NA
zig-11	NA
uda-1	NA
allo-1	NA
F17H10.1	NA
K06G5.1	NA
snf-3	NA
egl-21	egl-21 encodes a putative carboxypeptidase (whose homologs include humanenkephalin convertase/carboxypeptidase E); EGL-21 is expressedthroughout the nervous system; EGL-21 is required for normal synthesisof FMRFamide-like (FLP) and neuropeptide-like (NLP) peptides, and for normal egg-laying, locomotion, and defecation; EGL-21 promotes acetylcholine release at neuromuscular junctions; egl-21 mutan…
mlt-7	mlt-7 encodes an animal heme peroxidase; MLT-7 is required for formation of the C. elegans cuticle and normal molting; specifically, MLT-7 functions in combination with BLI-3/DUOX for proper cross-linking of cuticular collagens; when expressed in vitro, MLT-7 exhibits peroxidase activity; MLT-7 is expressed in the hypodermis, which synthesizes the cuticle, at each larval molt.
C01B10.6	NA
Y59E9AL.2	NA
msp-40	msp-40 encodes a protein that belongs to a family of proteins called the Major Sperm Proteins (MSPs) that is conserved in nematodes; this family consists of closely related, small, basic proteins that make up 15% of sperm protein; this multigene family consists of over fifty genes, including many pseudogenes; MSPs are involved in both extracellular signaling and cytoskeletal functions during repr…
spch-3	spch-3 encodes one of three C. elegans small, highly basic proteins that have similarity to mouse testis-specific histone H1, the human nucleotide binding and splicing-associated protein SON, and the mollusk protamine-like SNBPs (sperm nuclear basic proteins); SPCH-3 associates specifically with spermatogenic meiotic and mature sperm chromatin.
cpn-1	cpn-1 encodes a calponin homolog, more closely related to calponin per se than to its paralogs transgelin (SM22 alpha) or neuronal protein NP25, that is is dispensable for viability and gross morphology in mass RNAi screens, and that has no obvious mutant phenotype in a rearrangement that probably disrupts cpn-1.
dhs-28	dhs-28 encodes an ortholog of human 17-BETA-HYDROXYSTEROID DEHYDROGENASE 4 (HSD17B4; OMIM:601860, mutated in D-bifunctional protein deficiency), which contains a C-terminal SCP-2 sterol transfer domain; the deletion allele dhs-28(ok450) is superficially wild-type.
dhs-6	The dhs-6 locus is predicted to encode four transcripts derived from alternative splicing and alternative transcriptional initiation sites; the longest transcript is predicted to encode a member of the eukaryotic translation initiation factor family within its amino-terminal end, and is a member of both the SCP-2 sterol transfer family and short-chain dehydrogenase-reductase families within its c…
tnt-3	tnt-3 is orthologous to the human gene TROPONIN T (TNNT2; OMIM:191045), which when mutated leads to disease.
apl-1	apl-1 encodes two almost identical isoforms orthologous to human Amyloid precursor protein (APP); although native APL-1 is predicted to be membrane-bound until proteolytically cleaved, neuronal expression of a partial N-terminal extracellular region of APL-1 alone, containing either the E1 or the E2 domain, is sufficient for APL-1's normal functions in vivo (molting and morphogenesis, pharyngeal …
chat-1	NA
svh-2	NA
ape-1	ape-1 encodes an ortholog of inhibitory p53-interacting protein (iASPP);APE-1 binds CEP-1 in vitro, and shares 38% amino-acid identity in itsankyrin repeats and SH3 domain to iASPP, with many iASPP residuescontacting p53 being conserved; RNAi of ape-1 induces CEP-1- andHUS-1-dependent apoptosis in the germline, consistent with inhibition ofthe CEP-1/HUS-1 DNA damage checkpoint by APE-1 in the ger…
F58D2.2	NA
Y34B4A.6	NA
lron-7	NA
spch-1	spch-1 encodes one of three C. elegans small, highly basic proteins that have similarity to mouse testis-specific histone H1, the human nucleotide binding and splicing-associated protein SON, and the mollusk protamine-like SNBPs (sperm nuclear basic proteins); spch-1(RNAi) has been reported to result in low penetrance male meiosis defects; SPCH-1 associates specifically with spermatogenic meiotic…
kin-1	kin-1 encodes multiple isoforms of a serine/threonine protein kinase that is orthologous to cAMP-dependent protein kinase (protein kinase A or PKA) catalytic subunits; KIN-1 is able to phosphorylate histone H2B in vitro and is associated with both particulate (~65%) and cytosolic (35%) cellular fractions; KIN-1 is expressed at low levels during embryogenesis, but its expression level increases in…
C50E10.1	NA
dpf-2	NA
snb-1	The snb-1 gene encodes synaptobrevin, a synaptic vesicle protein orthologous to human vesicle-associated membrane protein 1 (VAMP1 OMIM:185880) and 2 (VAMP2 OMIM:185881), and is required for viability and synaptic transmission; SNB-1 is likely to play a role in vesicle docking and/or fusion and is expressed in neurons where it colocalizes with synaptic vesicle proteins RAB-3 and synaptotagmin.
hphd-1	NA
K07E3.4	NA
vha-6	vha-6 encodes an ortholog of subunit a of the membrane-bound (V0) domainof vacuolar proton-translocating ATPase (V-ATPase); VHA-6 is orthologousto human ATP6N1A (OMIM:192130), ATP6V0A2, ATP6V0A4 (OMIM:605239, mutatedin distal renal tubular acidosis), and TCIRG1 (OMIM:604592, mutated inosteopetrosis); VHA-6 is expressed in germline (P2 through Z3 cellsuntil the comma stage), on the apical surface …
fln-1	fln-1 encodes three protein isoforms, a full length filamin (fln-1a) orthologous to human filamin A, alpha (FLNA; OMIM:300017), of 2257 amino acids containing a well conserved N-terminal ABD and 20 Ig-like repeats and two trans-sliced versions with C- and N- terminal truncations are 1084 and 836 amino-acids respectively; expression of full-length filamin in hermaphrodites is required for normal b…
F22D6.2	NA
ZK370.4	NA
nex-1	nex-1 encodes an annexin, a member of a family of calcium-dependent phospholipid binding proteins; NEX-1 is required for efficient engulfment of apoptotic cell corpses in the pharynx, and may also function in other membrane fusion events, such as exocytosis; NEX-1 in vitro can bind phosphatidylserine, phosphatidylinositol, heparin, heparan sulfate, and chondroitin sulfate; NEX-1 is expressed in t…
Y69E1A.1	NA
F28B4.3	NA
vha-14	vha-14 encodes an ortholog of subunit D of the cytoplasmic (V1) domainof vacuolar proton-translocating ATPase (V-ATPase); VHA-14 is apredicted cytosolic rotor (stalk) component.
alh-8	alh-8 is orthologous to the human gene METHYLMALONATE-SEMIALDEHYDE DEHYDROGENASE (ALDH6A1; OMIM:603178), which when mutated leads to MMSDH deficiency.
ifc-2	ifc-2 encodes three isoforms of an intermediate filament protein dispensable for viability but required for normal movement, growth rate, body size, body shape, and cuticle strength; IFC-2 is present in the cytoplasm of intestinal cells, and at the desmosomes of intestinal and pharyngeal cells.
C04G2.9	NA
vha-15	vha-15 encodes an ortholog of subunit H of the cytoplasmic (V1) domainof vacuolar proton-translocating ATPase (V-ATPase); VHA-15 and VHA-18are co-orthologs; VHA-15, along with VHA-2 and probably all V-ATPasesubunits, is required for systemic RNAi, probably during endocytoticRNAi uptake; VHA-15 is a predicted cytosolic stator (stalk) component;neurons).
F21H7.5	NA
lec-2	lec-2 encodes a 'tandem repeat' type galectin (beta-galactosyl-binding lectin) containing two, tandemly arranged carbohydrate recognition domains; by homology, LEC-2 may play roles in cell adhesion and aggregation, proliferation, or programmed cell death.
pck-2	pck-2 is one of three C. elegans genes that encode proteins with similarity to phosphoenolpyruvate carboxykinase (PEPCK); by similarity, the products of pck-2 are predicted to function in gluconeogenesis.
F25B5.3	F25B5.3 is orthologous to the human gene NUCLEOTIDASE, 5-PRIME, CYTOSOLIC III (NT5C3; OMIM:606224), which when mutated leads to hemolytic anemia due to UMPH1 deficiency
bcat-1	bcat-1 encodes a branched-chain amino acid aminotransferase that, by homology, is predicted to catalyze the first reaction in the catabolism of essential branched-chain amino acids such as leucine, isoleucine, and valine; in C. elegans, large-scale RNA-mediated interference (RNAi) screens indicate that bcat-1 activity is required for embryonic and larval development.

## Sheet: 8
gene	Concise description
eif-2gamma	NA
copa-1	Y71F9AL.17 encodes an alpha subunit of the coatomer (COPI) complex; in mass RNAi assays, Y71F9AL.17 is required for embryonic viability, fertility, normal locomotion, and normally rapid growth.
cct-6	cct-6 encodes, by alternative splicing, two isoforms of a putative zeta subunit of the eukaryotic cytosolic ('T complex') chaperonin, orthologous to human CCT6A (OMIM:104613); CCT-6 represses SKN-1-dependent transcription of gst-4; CCT-6 is expressed in a few cells of pre-comma stage embryos; in mass RNAi assays, CCT-6 is required for normally short life span, and for normal transgene subcellular…
yop-1	NA
gsp-1	NA
tkt-1	tkt-1 encodes an ortholog of the human gene TRANSKETOLASE (TKT; OMIM:606781), which when mutated leads to Wernicke-Korsakoff syndrome (OMIM:277730).
rpn-5	NA
rpt-1	rpt-1 encodes a predicted ATPase subunit of the 19S regulatory complex of the proteasome that affects fertility and embryonic viability.
tars-1	NA
rpt-3	rpt-3 encodes a triple A ATPase subunit of the 26S proteasome's 19S regulatory particle (RP) base subcomplex; RPT-3 is required for embryonic, larval, and germline development and by homology, is predicted to function in unfolding protein substrates and translocating them into the core proteolytic particle (CP) of the proteasome.
B0250.5	NA
arf-3	arf-3 encodes a member of the ADP-ribosylation factor related protein family; likely expressed in touch receptors and regulated by MEC-3.
nmt-1	nmt-1 encodes an N-myristoyl transferase; by homology, NMT-1 is predicted to catalyze the cotranslational attachment of myristate from CoA to the N-terminal glycine residue of proteins; in C. elegans, nmt-1 is widely expressed and required for a number of diverse processes, including development, locomotion, and apoptosis.
gln-3	NA
rpn-9	rpn-9 is predicted to encode a non-ATPase subunit of the 19S regulatory complex of the proteasome that that affects body morphology, embryonic viability, locomotion, larval viability, fertility, and growth; interacts with RPN-11 in yeast two-hybrid assays.
cct-2	cct-2 encodes a putative beta subunit of the eukaryotic cytosolic ('T complex') chaperonin, orthologous to human CCT2 (OMIM:605139); CCT-2 is expressed in most, if not all, tissues; CCT-2 represses SKN-1-dependent transcription of gst-4; CCT-2 is expressed in touch receptor neurons in a MEC-3-dependent fashion; in mass RNAi assays, CCT-2 is required for normal transgene repression and subcellular…
tbh-1	tbh-1 encodes a tyramine beta-hydroxylase orthologous to human DBH (OMIM:609312, mutated in dopamine beta-hydroxylase deficiency); TBH-1 activity is required for biosynthesis of the octopamine neurotransmitter.
sgt-1	NA
sec-61	NA
uba-1	uba-1 encodes the only known ubiquitin-activating enzyme in C. elegans and is orthologous to Saccharomyces cerevisiae UBA1 and human UBE1; UBA-1 is essential for embryogenesis and larval development and is required for proper formation of the male tail, sperm fertility, proper body size, meiotic progression in the embryo and germline development; by homology, UBA-1 is predicted to function in an …
sqd-1	NA
sao-1	sao-1 encodes a novel GYF domain-containing protein that is conserved amongst nematodes; maternally provided SAO-1 functions together with SEL-10, a component of an E3 ubiquitin ligase with which it physically interacts, to negatively regulate the Notch receptor signaling pathway in the early embryo; mutations in sao-1 also suppress early cytokinesis defects in rfl-1 mutant embryos (rfl-1 encodes…
pas-6	pas-6 encodes a type 1 alpha subunit of the 26S proteasome's 20S protease core particle (CP); PAS-6 is required for embryonic, larval, and germline development and by homology, is predicted to comprise the outer rings of the proteasome and to play a role in selective degradation of ubiquitinated proteins during development; in vitro, PAS-6 interacts with BRP-1, a glutamine/asparagine (Q/N)-rich d…
pdi-2	pdi-2 encodes a protein disulfide isomerase beta subunit; by homology, PDI-2 is predicted to function in oxidative protein folding in the endoplasmic reticulum (ER); PDI-2 activity is required for several organismal processes including body morphology, locomotion, fertility, molting, and collagen deposition; pdi-2 transcript levels are increased in response to ER stress; pdi-2 is expressed in the…
hel-1	hel-1 encodes an ortholog of human 56-kD U2AF65 associated protein (UAP56)that is required for exporting mRNAs from the nucleus; unlike animals withRNAi against several other splicing factors, hel-1(RNAi) animals fail toexport transgenic GFP mRNA from the nucleus; conversely, hel-1overexpression is lethal, with failed transgene expression as well.
ZK809.8	NA
rad-23	rad-23 encodes a protein containing ubiquitin-like (UBL) and ubiquitin-associated (UBA) domains that is a member of the Radiation Sensitivity 23 (RAD23) family of proteasomal ubiquitin receptors; in C. elegans, rad-23 activity is required for normal axon branching; rad-23 displays genetic interactions with png-1, which encodes a peptide-N-glycanase, also required for proper axon branching during …
act-2	act-2 encodes one of five C. elegans actins; act-2 functions redundantly in early embryonic cortical microfilaments with act-1 and act-3, and dominant mutations in act-2 result in uncoordinated locomotion; an ACT-2::GFP reporter fusion is expressed in the cytoplasm of embryonic cells and is also found in contractile filaments in adult muscle cells.
pdi-1	pdi-1 encodes a protein disulfide isomerase; loss of function mutations in pdi-1 result in no obvious abnormalities, but animals triply mutant for three C. elegans PDI's, encoded by pdi-1, pdi-2, and pdi-3, display embryonic lethality characterized by loss of vermiform morphology after elongation, suggesting that the pdi genes function redundantly in embryonic morphogenesis; PDI-1 exhibits protei…
hpo-19	The T05H4.5 gene encodes an ortholog of the human gene NADH-CYTOCHROME B5 REDUCTASE (DIA1), which when mutated leads to methemoglobinemia (OMIM:250800).
ogdh-2	NA
rmd-1	NA
gpi-1	gpi-1 encodes two isoforms of a putative glucose 6-phosphate isomeraseorthologous to human GPI (OMIM:172400, mutated in chronic hemolyticanemia); gpi-1 is required both for embryonic viability and(paradoxically) for normally short lifespan; gpi-1 is expressed inneurons and intestine.
enol-1	enol-1 is orthologous to human ENOLASE 1 (also CRYSTALLIN, TAU; ENO1; OMIM:172430), which when mutated leads to spherocytic red cell enolase deficiency.
lbp-2	lbp-2 encodes a homolog of the novel fatty acid binding protein, As-p18, found in the parasitic nematode Ascaris suum; As-p18 is a member of a family of small intracellular fatty acid binding proteins (iFABPs); the expression pattern of lpb-2 is consistent with it being secreted into the perienteric fluid where it may play a role in lipid transport beween the intestine and body wall; a lbp-2 prom…
Y18D10A.11	NA
cct-5	cct-5 encodes, by alternative splicing, two isoforms of a putative epsilon subunit of the eukaryotic cytosolic ('T complex') chaperonin, orthologous to human CCT5 (OMIM:610150, mutated in sensory neuropathy with spastic paraplegia); CCT-5 represses SKN-1-dependent transcription of gst-4; in mass RNAi assays, cct-5 is required for normal embryonic osmotic integrity, transgene subcellular localizat…
ruvb-1	ruvb-1 encodes a AAA+ ATPase orthologous to the RUVBL1 family of ATPases; ruvb-1 functions as a component of the TOR signaling pathway that promotes localization of the box C/D snoRNP complex to nucleoli, thus enabling robust protein synthesis; ruvb-1 mutations strongly suppress pha-4 mutations, suggesting that pha-4 and the CeTOR pathway antagonize one another to regulate larval development and …
ubc-13	ubc-13 encodes an E2 ubiquitin-conjugating enzyme; by homology, UBC-13 is predicted to function in the covalent attachment of ubiquitin molecules to protein substrates, via its association with an E3 ubiquitin-protein ligase; UBC-13 physically interacts with the UEV-1 ubiquitin-conjugating enzyme variant, and like UEV-1, ubc-13 mutations result in defects in GLR-1 glutamate receptor trafficking a…
glt-1	glt-1 encodes a predicted plasma membrane glutamate transporter that is functional when expressed in Xenopus oocytes; expressed in the M3 pharyngeal neuron, the male tail, some anterior hypodermal cells, and in cells in the terminal bulb of the pharynx.
dars-1	drs-1 encodes a putative aspartyl(D) tRNA synthetase
sucg-1	NA
hsp-60	hsp-60 encodes a nuclear-encoded mitochondrion-specific chaperone that is a member of the GroE/Hsp10/60 superfamily of molecular chaperones; hsp-60 is involved in the mitochondrial unfolded protein response, as hsp-60 expression, normally broadly detected during development, is greatly increased in response to treatments that disrupt mitochondrial protein handling; loss of hsp-60 activity via RNA…
ran-4	ran-4 encodes a ortholog of NUCLEAR TRANSPORT FACTOR 2 (NTF2) from S. cerevisiae and metazoa, which is predicted to interact with nucleoporins and to promote transport of RAN-1(+GDP) into the nucleus; RAN-4/NTF2 proteins are paralogous to the N-terminal domain of RasGAP SH3 binding proteins such as Drosophila RASPUTIN, and to delta-5-3-ketosteroid isomerases, while having no homology to Ran prote…
fah-1	fah-1 encodes a putative fumarylacetoacetate hydrolase, orthologous to human FAH (OMIM:276700, mutated in type I tyrosinemia), that is required for tyrosine metabolism, resistance to oxidative and protein-folding stresses, and more generally for normally rapid growth, normal locomotion, fertility, and viability; fah-1 is expressed in hypodermis and intestine; the intestines of fah-1(RNAi) animals…
abce-1	NA
B0238.11	NA
ubql-1	NA
gale-1	gale-1 encodes a putative UDP-galactose-4-epimerase, orthologous tohuman GALE (OMIM:606953, mutated in galactose epimerase deficiency);GALE-1 is thought to interconvert UDP-N-acetylglucosamine andUDP-N-acetylgalactosamine at the end of the hexosamine pathway; gale-1is expressed in neurons, intestine and the developing reproductivesystem, but has no observed function in mass RNAi assays.
dnj-29	This gene encodes a protein containing a DnaJ ('J') domain.
eif-2alpha	NA
F53E2.2	NA
K12H4.3	NA
wdr-46	NA
ftn-2	ftn-2 encodes one of two C. elegans ferritin heavy chain homologs; loss of ftn-2 activity via deletion mutation results in slightly lower brood sizes and, under iron stress conditions, slightly faster growth from the L4 to adult stage of development, and slightly reduced lifespan; an ftn-2::gfp reporter fusion is expressed in diverse tissues, including the pharynx, intestine, and hypodermis, and …
pfd-5	pfd-5 encodes a putative prefoldin 5 subunit, orthologous to human PFDN5 (OMIM:604899), that is required for normal microtubule growth, embryonic and larval viability, fertility, vulval development, and locomotion; PFD-5 is expressed in most, if not all, tissues; pfd-5(RNAi) animals show sterile progeny, larval arrest or lethality, uncoordination, and abnormal body shapes, and pfd-5(RNAi) embryos…
cct-1	cct-1 encodes a putative alpha subunit of the eukaryotic cytosolic ('T complex') chaperonin, orthologous to human TCP1 (OMIM:186980), and required for normal pronuclear-centrosome rotation, positioning of the mitotic spindle, meiosis, and distal tip cell migration; CCT-1 is also required to repress SKN-1-dependent transcription of gst-4, and for fertility and viability; CCT-1 is expressed in larv…
dad-1	dad-1 encodes an ortholog of human DAD1 (OMIM:600243) that inhibits cell death and can functionally complement the hamster protein in cultured cells.
tomm-40	NA
C16A3.6	NA
rpn-6.1	rpn-6.1 encodes a non-ATPase subunit of the 19S regulatory complex of the proteasome that affects adult viability, larval viability, embryonic viability, fertility, and osmoregulation.
nra-2	NA
F19F10.9	The F19F10.9 gene encodes a homolog of the human SART1 gene, which encodes a protein recognised by IgE that may be involved in atopic disease.
Y61A9LA.10	NA
rpt-4	rpt-4 encodes a predicted ATPase subunit of the 19S regulatory complex of the proteasome that affects body morphology, embryonic viability, growth, movement, and fertility; interacts with itself in yeast two-hybrid assays.
pbs-6	The pbs-6 gene encodes a homolog of mammalian PSMB1.
Y94H6A.5	Y94H6A.5 encodes a DEAD-box helicase; loss of Y94H6A.5 activity via RNAi indicates that Y94H6A.5 activity is required for positive regulation of growth rate and larval development.
ddx-27	ddx-27 encodes a putative DEAD-box helicase, orthologous to human DDX27 and Drosophila Rs1, that is required for larval development and normally rapid growth.
toe-1	NA
ola-1	NA
F56A8.3	NA
puf-5	puf-5 encodes a Pumilio protein; PUF-5 is required, redundantly with PUF-6/7, for translational repression of glp-1 mRNA in oocytes (via specific elements in the 3' UTR site), and for normal oocyte maturation (growth, organization, nuclear enlargement, yolk uptake, and localization of RME-2 to the plasma membrane) and early embryogenesis (cell divisions and eggshell formation); since glp-1 mutati…
nol-2	NA
mars-1	mars-1 encodes a predicted cytoplasmic methionyl-tRNA synthetase (MetRS), a class I aminoacyl-tRNA synthetase that catalyzes the attachment of methionine to its cognate tRNA and is thus required for protein biosynthesis; MARS-1 is essential for embryogenesis and required also for a normal rate of postembryonic growth.
W08E12.7	NA
C05D11.1	NA
alh-6	alh-6 is orthologous to the human gene ALDEHYDE DEHYDROGENASE 4 FAMILY, MEMBER A1 (ALDH4A1; OMIM:606811), which when mutated leads to hyperprolinemia type II.
pqn-22	The protein product of this gene is predicted to contain a glutamine/asparagine (Q/N)-rich ('prion') domain, by the algorithm of Michelitsch and Weissman (as of the WS77 release of WormBase, i.e., in wormpep77).
K05C4.5	NA
lars-1	lrs-1 encodes a predicted cytoplasmic leucyl-tRNA synthetase (LeuRS), a class I aminoacyl-tRNA synthetase that catalyzes the attachment of leucine to its cognate tRNA and is thus required for protein biosynthesis; LRS-1 activity is required for embryonic, larval, and germline development, as well as normal body morphology and rates of postembryonic growth.
C05D11.9	C05D11.9 encodes an ortholog of Pop1, a protein subunit shared by theendoribonucleases RNase MRP and RNAse P; RNAse MRP cleavesmitochondrial RNA in mitochondrial DNA synthesis, nucleolar pre-rRNA inribosome synthesis, and at least one mRNA (CLB2) involved in cell-cycleregulation; RNAse P cleaves tRNA precursors to produce their mature 5'end; C05D11.9 is evolutionarily ubiquitous among eukaryotes.
mig-22	NA
hpo-8	NA
mrps-18C	NA
Y39B6A.33	Y39B6A.33 encodes the C. elegans ortholog of mammalian GLTSCR2/PICT1 (GLioma Tumor Suppressor Candidate Region gene 2/Protein Interacting with the C Terminus-1); loss of Y39B6A.33 activity via RNAi results in lower oxygen consumption rates, suggesting that Y39B6A.33 plays a role in positively regulating mitochondrial respiration rates; in body wall muscle cells, Y39B6A.33 localizes to the nucleol…
hsp-110	C30C11.4 encodes a member of the Hsp70 family of heat shock proteins; loss of C30C11.4 activity via large-scale RNAi screens results in a variety of defects including embryonic and larval lethality, slow growth rates, and locomotory and morphological defects; in addition loss of C30C11.4 has been reported to result in a small but reproducible reduction in adult lifespan in otherwise long-lived an…
ctps-1	NA
top-1	top-1 encodes the C. elegans DNA topoisomerase I ortholog; TOP-1 exhibits DNA topoisomerase I activity in vitro and in vivo, this activity is required for normal gonad, germline, and embryonic development; top-1 mRNA is expressed throughout the gonad and during early embryogenesis, with mRNA levels nearly gone by hatching; TOP-1 protein levels are highest in embryos and L1 larvae, decrease by the…
mdf-1	mdf-1 encodes a coiled-coil domain-containing protein that is orthologous to the Saccharomyces cerevisiae mitotic spindle checkpoint protein Mad1p; consistent with a role as a checkpoint protein, MDF-1 is required in C. elegans for mitotic genome stability and hence, long-term survival and fertility; in vitro, MDF-1 interacts with MDF-2, the C. elegans Mad2p ortholog.
pgam-5	pgam-5 encodes a phosphoglycerate mutase that uses alternate catalytic activity as a protein serine/threonine phosphatase; PGAM-5 physically interacts with the SKN-1 transcription factor in a directed yeast two-hybrid assay as well as in vitro coimmunoprecipitation studies; based on sequence similarity, PGAM-5 is predicted to be a mitochondrial outer membrane protein.
orc-1	Y39A1A.12 encodes a homolog of origin recognition complex 1, which is also a distant paralog of CDC-6; both Y39A1A.12 and CDC-6 encode homologs of the origin complex which, in yeast, controls the start of DNA replication; whether either Y39A1A.12 or CDC-6 are required for this function in C. elegans, individually or in parallel, is unknown.
rpt-2	NA
T24H7.2	T24H7.2 encodes an ortholog of hypoxia-upregulated vertebrate proteins such as human HYOU1; T24H7.2, its C. elegans paralog T14G8.3, and HYOU1 are ER resident hsp70 family molecular chaperone homologs; the grp (glucose regulated protein) 170 family is a collection of related large hsp70 chaperones confined to the ER; members of this family are present in all eukaryotes, participating in a wide ra…
eif-3.F	NA
hsp-90	daf-21 encodes a member of the Hsp90 family of molecular chaperones; DAF-21 activity is required for larval development, negative regulation of dauer larva formation, and a number of specific chemosensory behaviors, such as the response to chemicals and odorants detected by the ASE and AWC sensory neurons; a daf-21 sensory defect can be rescued by a cyclic GMP analogue, suggesting that, in regula…
bckd-1B	NA
F07F6.4	NA
gfm-1	gfm-1 encodes the C. elegans ortholog of mitochondrial translation elongation factor G1 (EFG1), a GTP-binding protein essential for the elongation phase of protein synthesis; loss of gfm-1 activity via RNAi in wild-type and various mutant backgrounds results primarily in embryonic lethality with additional defects seen in reproduction, growth rate, larval development, body morphology, and endocyt…
Y45F10D.7	Y45F10D.7 encodes a WD40 repeat-containing protein that is the C. elegans ortholog of human WDR36, mutations in which cause primary open angle glaucoma type 1G (GLC1G, OMIM:609887); large-scale RNAi experiments indicate that Y45F10D.7 activity is required for embryonic and larval development; the Saccharomyces cerevisiae homolog of WDR36, Utp21, is a component of the small-subunit (SSU) processom…
ile-1	ile-1 is orthologous to the human gene human ERGIC-53, which when mutated leads to deficiency of coagulation factors V/VIII (OMIM:227300).
F19B6.1	NA
pdi-3	pdi-3 encodes a protein disulfide isomerase (PDI) required for normal cuticle collagen deposition and, subliminally, for maintenance of normal body shape; PDI-3 has both PDI and calcium-dependent transglutaminase activity in vitro, crosslinking proteins through a gamma-glutamyl epsilon-lysine dual residue; PDI-3 is homologous to the human PDI ERp60, as well as a homolog in the dog heartworm Dirof…
oxa-1	NA
dlc-1	dlc-1 encodes a dynein light chain 1, required for viability, that inhibits DHC-1 in vivo; DLC-1 is 92-95% identical to its orthologs human DYNLL1 (OMIM:601562) and DYNLL2 (OMIM:608942); DLC-1 is paralogous to DLC-2/-6; DLC-1 is expressed in adult body wall muscle, and in larval and adult pharynx, posterior intestine, and nervous system (e.g., ventral nerve cord, head neurons, and tail neurons); …
vpr-1	vpr-1 encodes the C. elegans VAP (VAMP-associated protein) ortholog, a transmembrane protein containing an N-terminal extracellular major sperm protein (MSP) domain; loss of vpr-1 function during development indicates that vpr-1 is required, both in vab-1-dependent and vab-1-independent pathways, for proper distal tip cell migration during somatic gonad development, ventral hypodermal cell migrat…
nra-4	NA
ubh-4	NA
rsp-7	rsp-7 encodes the C. elegans ortholog of the vertebrate p54 splicing factor and member of the SR protein family of nuclear phosphoproteins that are required for constitutive splicing and influence alternative splicing regulation.
C49H3.9	NA
lam-1	lam-1 encodes a laminin beta that affects degenerin-induced cell death and is required redundantly with lam-2 for morphogenesis.
rbm-39	NA
rpt-6	rpt-6 encodes a triple A ATPase that is a subunit of the 26S proteasome 19S regulatory particle (RP) base subcomplex; RPT-6 is required for embryonic and larval development and by homology, is predicted to function in unfolding protein substrates and translocating them into the core proteolytic particle (CP) of the proteasome.
T10B5.3	NA
moma-1	NA
cchl-1	cchl-1 encodes a cytochrome C-type heme lyase; by homology, CCHL-1 is predicted to covalently attach heme to cytochrome c; loss of cchl-1 activity results in longer lifespan.
art-1	a protein similar to synaptic glycoprotein SC2 from mammals.
dao-5	dao-5 encodes a predicted nucleolar phosphoprotein related to Saccharomyces cerevisiae SRP40 and the vertebrate Nopp140 proteins that may play a role in rRNA gene transcription and nucleolar structural organization; dao-5 expression is negatively regulated by the DAF-2/insulin-like receptor and positively regulated by the DAF-16/fork-head transcription factor, suggesting that dao-5 may be involve…
nol-56	NA
mtr-4	mtr-4 encodes the C. elegans homolog of Saccharomyces cerevisiae Mtr4p, an RNA helicase that functions as part of the TRAMP complex that regulates polyadenylation of mRNAs destined for decay or exosomal trimming; loss of mtr-4 activity results in a variety of defects, including defects in germ line development; MTR-4 can be phosphorylated by murine ERK2 in vitro, suggesting that it is a substrate…
lin-10	lin-10 encodes a PDZ and PTB domain-containing protein that is homologous to mammalian Munc interacting proteins (Mint1, OMIM:602414) and is required for polarized protein localization; LIN-10 is required for proper localization of the LET-23 EGF receptor to the basolateral membrane of the vulval precursor cells and for proper postsynaptic localization of GLR-1, an AMPA-type glutamate receptor in…
cogc-6	cogc-6 encodes an ortholog of mammalian COG-6, a subunit of lobe B ofthe conserved oligomeric Golgi complex (COGC); COGC-6 is weakly requiredfor normal gonadal distal tip cell migration, a process that alsorequires seven other orthologs of COGC subunits; like other lobe Bsubunits in both C. elegans and S. cerevisiae, COGC-6 is only partiallyrequired for normal function, while lobe A subunits are …
npl-4.2	NA
elo-3	The elo-3 gene encodes a paralog of elo-1 and elo-2, each of which encodes a polyunsaturated fatty acid (PUFA) elongase; ELO-3 may be required for normally rapid growth.
mpst-1	NA
Y71H10B.1	NA
plrg-1	NA
acl-7	acl-7 is an ortholog of human GNPAT (glyceronephosphate O-acyltransferase); ACL-7 is required for the biosynthesis of ether lipids.
T26E3.4	NA
col-178	NA
H43I07.3	NA
pmp-1	pmp-1 encodes an ATP-binding cassette (ABC) transporter most closely related to the peroxisomal membrane proteins; pmp-1 activity is required for efficient RNA interference (RNAi) of a germline-expressed target, pop-1.
snx-1	snx-1 encodes a PX and BAR domain-containing protein that is the C. elegans ortholog of the Vps5/SNX1 subunit of the core retromer complex; in C. elegans, SNX-1 functions as a component of the retromer complex that, along with RME-8 and HSP-1, regulates retrograde endosome-to-Golgi transport through control of endosomal clathrin dynamics; SNX-1 binds RME-8 in vitro; SNX-1 is expressed in several …
ears-1	ers-2 encodes a predicted mitochondrial glutamyl-tRNA synthetase (GluRS), a class I aminoacyl-tRNA synthetase that catalyzes the attachment of glutamate to its cognate tRNA and is thus required for protein biosynthesis; ERS-2 contains, at its C-terminus, six tandemly repeated WHEP-TRS domains that have been predicted to function as general RNA-binding domains that may act as cis tRNA-binding cofa…
unc-52	The unc-52 gene encodes perlecan, a protein orthologous to human basement membrane-specific heparan sulfate proteoglycan core protein (HSPG2; OMIM:142461, which when mutated leads to Schwartz-Jampel syndrome or dyssegmental dysplasia); UNC-52 plays essential roles in muscle structure development and regulation of growth factor-like signaling pathways; UNC-52 is synthesized by the hypodermis and l…
nol-58	NA
dct-18	NA
let-630	let-630 was identified in screens for ethyl methanesulfonate (EMS)-induced lethal mutations on the left arm of chromosome I; let-630 is defined by two mutations that result in adult sterility.
pas-4	pas-4 encodes a proteasome alpha-type seven subunit of the core 20S proteasome subcomplex; loss of pas-4 activity via RNAi results in a wide variety of defects including embryonic and larval lethality, sterility, abnormal locomotion, slow growth, and abnormal transgene expression and subcellular localization; loss of pas-4 activity also results in activation of SKN-1, a transcription factor requi…
F13B9.1	F13B9.1 encodes two proteins by alternative splicing which contain both an immunoglobulin/MHC-like domain and a glutamine/asparagine-rich domain.
hsp-1	hsp-1 encodes hsp70A, a member of the heat shock family of proteins; hsp70A is closely related to the Drosophila heat inducible hsp70s and the S. cerevisiae SSA hsp70 subfamily; the hsp-1 gene is normally expressed throughout development and upon heat-shock the hsp-1 mRNA is enhanced 2-6 fold; down-regulation of hsp-1 via RNA interference results in a small reduction in the life-span of an age-1 …
pas-2	pas-2 encodes a proteasome subunit with highest similarity to vertebrate proteasome alpha 2 subunits.
pyk-1	pyk-1 encodes one of two C. elegans pyruvate kinases; large-scale RNAi experiments indicate that pyk-1 is essential for embryonic development and specifically, for normal cortical activity in the AB blastomere; large-scale expression studies show that pyk-1 is expressed in body wall muscle in larvae and in body wall and vulval muscle, as well as in the reproductive system, in adults.
ctc-1	The ctc-1 gene resides on the mitochondrial chromosome, and encodes the protein cytochrome c oxidase subunit 1; CTC-1 functions as the catalytic subunit of the cytochrome c oxidase complex (also known as Complex IV) that is the terminal member of the electron transport chain that catalyzes the reduction of oxygen to water.
T14G10.5	T14G10.5 encodes a gamma subunit of the coatomer (COPI) complex; in mass RNAi assays, T14G10.5 is required for locomotion, fertility, normally rapid growth, and general health.
grd-3	grd-3 encodes a hedgehog-like protein, with an N-terminal signalsequence and a C-terminal Ground domain; GRD-3 is expressed in adultanterior and posterior seam cells, overlapping GRD-5 expression; GRD-3is also strongly expressed upon infection with the gram-negativebacterium Serratia marcescens, indicating that GRD-3 may be part of C.elegans' innate immunity response; the Ground domain is predict…
abcf-3	abcf-3 encodes a protein with sequence similarity to AAA ATPases that is the C. elegans ortholog of the S. cerevisiae ribosome-association protein Gcn20p; ABCF-3, along with GCN-1, is required for maintaining the steady-state levels of phosphorylated eIF2alpha, and thus for the translational control of a number of mRNAs; ABCF-3 activity is required, in parallel to, or downstream of, the canonical…
ccdc-47	NA
del-6	NA
aqp-7	aqp-7 encodes an aquaglyceroporin whose expression in Xenopus oocytes increases either water or glycerol permeability five- to seven-fold; AQP-7 has no function in mass RNAi assays, perhaps reflecting genetic redundancy with its several paralogs; AQP-7 is expressed in muscle punctae (perhaps focal adhesions).
pbs-7	pbs-7 encodes a B-type subunit of the 26S proteasome's 20S protease core particle; by homology, PBS-7 is predicted to function in ATP/ubiquitin-dependent nonlysosomal protein degradation; loss of pbs-7 activity via large-scale RNAi screens indicates that, in C. elegans, PBS-7 is required for normal movement and for embryonic, germline, and larval development.
rars-1	rrt-1 encodes an arginyl-tRNA synthetase that affects embryonic viability and fertility
eif-3.L	NA
cif-1	NA
teg-4	teg-4 encodes a SAP130 pre-mRNA splicing factor orthologous to human splicing factor 3b, subunit 3 (HGNC:SF3B3); teg-4 activity is required for proper regulation of the balance between proliferation and differentiation in the germ line; in regulating germline proliferation, teg-4 functions downstream of the GLP-1/Notch signaling pathway.
emb-5	emb-5 encodes the C. elegans ortholog of the Spt6 family of RNA polymerase II transcription elongation factors; first identified in screens for temperature-sensitive embryonic lethal mutations, emb-5 is required for the correct timing of the second E (endoderm)-cell division in the early embryo and thus, for normal embryonic gastrulation; in addition, emb-5 activity is required postembryonically …
daf-31	daf-31 encodes an ortholog of the ARrest-Defective-1 protein (ARD1) that is the catalytic subunit of the major N alpha-AcetylTransferase (NatA), a heterodimeric complex that is responsible for the cotranslational N-terminal acetylation of protein substrates; loss of daf-31 activity results in constitutive formation of dauer-like larvae and fat accumulation, indicating that DAF-31 is required for …
dys-1	The dys-1 gene encodes an ortholog of human DMD, which when mutated leads to Duchenne muscular dystrophy (OMIM:310200).
C05C10.3	C05C10.3 is orthologous to the human gene 3-OXOACID COA TRANSFERASE (also called succinyl-CoA:3-ketoacid CoA transferase; OXCT; OMIM:245050), which when mutated leads to episodic ketoacidosis.
puf-12	NA
mrpl-47	NA
mog-5	NA
gars-1	grs-1 encodes a member of the glycyl-tRNA synthetase family that affects embryonic viability and spindle maintenance during anaphase.
ribo-1	NA
nas-37	nas-37 encodes a Astacin-class metalloprotease required for full ecdysisthat is expressed in hypodermal cells 4 hours before each ecdysis; NAS-37protein has an N-terminal signal sequence followed by an Astacin proteasedomain and three protein-binding domains (EGF-like, CUB, andthrombospondin); NAS-37 accumulates in anterior cuticle, being shed withit after ecdysis; nas-37 mutants fail to complete…
tag-123	NA
pabp-2	pabp-2 encodes the C. elegans PABPN1 (polyadenylate-binding protein, nuclear 1) ortholog; by homology, PABP-2 is predicted to function as a poly(A)-binding protein involved in several aspects of pre-mRNA processing; large-scale RNAi screens indicate that pabp-2 activity is essential for embryonic and larval development, as well as normal rates of growth and locomotion; in humans, expansion of a p…
inx-8	inx-8 encodes an innexin; that affects fertility; inx-8 is expressed in a variety of tissues, including the gonadal sheath cells.
timm-17B.1	NA
dnj-11	dnj-11 encodes a protein containing DnaJ and Myb domains that is orthologousto the mammalian ZRF1/MIDA1/MPP11/DNAJC2 family of ribosome-associated molecular chaperones; in C. elegans, dnj-11 functions to regulate asymmetriccell division and mitotic spindle orientation in the NSM neuroblast andsubsequently the apoptotic death of the NSM sister cell; in regulatingNSM sister cell death, DNJ-11 funct…
ddx-17	NA
fars-3	NA
atgp-2	atgp-2 encodes an amino acid transporter glycoprotein subunit; when co-expressed in Xenopus oocytes with either the AAT-1 or AAT-3 catalytic subunit, ATGP-2 facilitates amino acid uptake and exchange, showing a relatively high affinity for small and some large neutral amino acids; when co-expressed with AAT-9, ATGP-2 is able to enhance the activity of this catalytic subunit; ATGP-2 can covalently…
tba-4	tba-4 encodes a member of the alpha tubulin family that also includes tba-1, tba-2, and tba-3, and affects embryonic viability.
F35A5.1	The F35A5.1 gene encodes a homolog of human FMR2, which when mutated leads to fragile site mental retardation, type 2 (OMIM:309548).
ltah-1.2	ZC416.6 encodes a protein with similarity to bifunctional leukotriene A4 hydrolases/aminopeptidases; loss of ZC416.6 activity via RNAi results in decreased intestinal dipeptide transport, increased fat storage, and increased free fatty acid uptake, a phenotype that mimics loss-of-function mutations in the PEPT-1 intestinal peptide transporter; the product of ZC416.6 is predicted to regulate PEPT-…
T28C6.7	NA
yars-1	NA
cct-4	cct-4 encodes a putative delta subunit of the eukaryotic cytosolic ('T complex') chaperonin, orthologous to human CCT4 (OMIM:605142); CCT-4 represses SKN-1-dependent transcription of gst-4; CCT-4 is expressed in pharynx, pharyngeal gland cells, intestine, renal gland cells, and neurons; CCT-4 is expressed in touch receptor neurons in a MEC-3-dependent fashion.
asp-14	asp-14 encodes an aspartyl protease.
dnj-9	This gene encodes a protein containing a DnaJ ('J') domain.
ahcy-1	ahcy-1 encodes the C. elegans S-adenosylhomocysteine hydrolase (SAHH) ortholog; by homology, AHCY-1 is predicted to catalyze the hydrolysis of S-adenosyl-L-homocysteine to adenosine and L-homocysteine; loss of ahcy-1 activity via RNAi results in embryonic and larval lethality, abnormal body morphology, sick animals, and uncoordinated locomotion; Northern blot analyses indicate the ahcy-1 mRNA is …
eif-3.C	eif-3.C encodes a putative c subunit of translation initiation factor 3 that is required for fertility and for embryonic osmotic integrity; eif-3.C is orthologous to human EIF3S8 (OMIM:603916) and budding yeast NIP1.
rpn-3	NA
mrps-35	NA
ngp-1	NA
tpp-2	F21H12.6 encodes the C. elegans tripeptidyl peptidase II ortholog; loss of F21H12.6 activity via RNAi indicates that the product of F21H12.6 promotes fat formation; an F21H12.6::GFP reporter fusion is expressed in the intestine, the site of fat storage, and in a subset of nerve ring neurons.
C35A5.8	NA
Y53C12B.1	NA
cct-3	cct-3 encodes a putative gamma subunit of the eukaryotic cytosolic ('T complex') chaperonin, orthologous to human CCT3 (OMIM:600114); in early embryos, CCT-3 is required for normally fast microtubule elongation; CCT-3 is also required to repress SKN-1-dependent transcription of gst-4; in mass RNAi assays, CCT-3 is required for normal embryonic and larval viability, and for fertility.
gly-6	NA
ctc-3	The ctc-3 gene resides on the mitochondrial chromosome, and encodes the protein cytochrome c oxidase subunit 3; cytochrome c oxidase is the component of the respiratory chain that catalyzes the reduction of oxygen to water; CTC-3 is one of the 3 subunits (1-3) that forms the functional core of the enzyme complex.
tald-1	Y24D9A.8 is orthologous to the human gene Transaldolase 1 (TALDO1), a key enzyme in the pentose phosphate pathway, which provides ribose-5-phosphate for nucleic acid synthesis and NADPH for lipid biosynthesis.
R02F2.7	NA
C06H5.6	NA
C16C10.8	NA
folt-2	folt-2 encodes a putative folate transporter; FOLT-2 is orthologous to the human folate transporters SLC19A1, SLC19A2, and SLC19A3 (Solute Carrier Family 19 (thiamine transporter), Member 1, 2 or 3); heterologously expressed FOLT-2 does not significantly transport folate; FOLT-2 does not seem to have any obvious function, perhaps because of genetic redundancy with its paralogs, FOLT-1 and FOLT-3.
pges-2	NA
hpo-29	NA
W04A4.5	NA
mans-2	mans-2 is an ortholog of human MAN1A1 (mannosidase, alpha1A, member 1), MAN1C1 (mannosidase, alpha1C, member 1) and MAN1A2 (mannosidase, alpha1A, member 2); mans-2 has a calcium ion dependent mannosyl-oligosaccharide 1,2-alpha-mannosidase activity, based on enzymatic assay, with Man6GlcNAc2 as a final product.
tag-335	NA
cisd-3.1	NA
col-140	NA
ent-1	ent-1 encodes a predicted equilibrative nucleoside transporter 1 that affects growth.
C18A3.3	NA
eif-2beta	NA
tut-2	NA
B0041.8	NA
rpn-7	rpn-7 is predicted to encode a non-ATPase subunit of the 19S regulatory complex of the proteasome that affects fertility and embryonic viability.
mrps-27	NA
C04E6.11	NA
let-767	let-767 encodes a steroid dehydrogenase required for embryogenesis, molting, and female reproduction; LET-767 is orthologous to human HSD17B3 (OMIM:605573, mutated in pseudohermaphroditism), HSD17B12 (OMIM:609574), and HSDL1; in vitro, LET-767 catalytically converts androstenedione and estrone into testosterone and estradiol, and in vivo probably catalyzes the synthesis of endogeneous steroid hor…
ZK1236.5	ZK1236.5 encodes a protein with no obvious non-nematode homologs; eitherZK1236.9, or ZK1236.5, or both proteins weakly inhibit DHC-1 in vivo;likewise, either ZK1236.5, or ZK1236.9, or both proteins are required inmass RNAi assays for normal osmoregulation and normally rapid growth.
rpc-1	NA
gcst-1	gcst-1 is orthologous to the human gene GLYCINE CLEAVAGE SYSTEM T-PROTEIN (AMT; OMIM:238310), which when mutated leads to glycine encephalopathy.
rpn-8	NA
clik-1	NA
B0564.7	NA
C29H12.2	NA
cra-1	NA
nid-1	nid-1 encodes the single C.elegans homolog of the nidogen (entactin) protein; members of the nidogen protein family are structural components of basement membranes and are believed to connect laminin and collagen IV networks together; in C. elegans, nid-1 is not required for basement membrane assembly, however, nid-1 is required for the proper positioning of the longitudinal neurons and to direct…
kars-1	NA
nap-1	D2096.8 encodes a protein related in sequence to the conserved NAP (Nucleosome Assembly Protein) family of proteins involved in chromatin remodeling; loss of D2096.8 activity in wild-type and various mutant backgrounds suggests that, in C. elegans, the product of D2096.8 is required for proper transcriptional regulation that affects a number of biological processes including embryonic and larval …
T06E6.1	NA
F02E8.4	NA
ttr-31	NA
nrfl-1	nrfl-1encodes, by alternative splicing, five isoforms of an ortholog of Drosophila SIP1 that maintains epithelial integrity via regulation of Moesin activity, and of the human SLC9A3R1 (OMIM:604990), SLC9A3R2 (OMIM:606553), PDZK1 (OMIM:603831), and PDZD3(OMIM:607146) proteins that regulate plasma membrane exchanger activity; in C. elegans, nrfl-1 is required for normally short lifespan and for no…
uggt-1	uggt-1 encodes one of two C. elegans homologs of UDP-Glc:glycoprotein glucosyltransferase (UGGT), an endoplasmic reticulum enzyme involved in quality control of glycoprotein folding; expression of uggt-1 in S. pombe cells lacking functional UGGT activity indicates that UGGT-1 displays UDP-Glc:glycoprotein glucosyltransferase activity; loss of uggt-1 activity via RNAi results in larval development…
hut-1	hut-1 encodes a nucleotide sugar transporter that is related to members of the solute carrier 35B1 (SLC35B1) subfamily of SLC35 transporters; HUT-1 activity is required for proper organization of the endoplasmic reticulum and for normal larval development; in the intestine, HUT-1 localizes to the endoplasmic reticulum and the Golgi apparatus.
tsfm-1	F55C5.5 encodes a translational elongation factor Ts (EF-Ts) that binds two different EF-Tu proteins (EF-TU1/Y71H2AM.23 and EF-TU2/C43E11.4) in vitro, stimulating guanine-nucleotide exchange and mRNA translation; F55C5.5 is predicted to be mitochondrial and has a putative N-terminal transit peptide sequence; F55C5.5 is required in mass RNAi assays for normally rapid growth and for maintenance of …
txl-1	txl-1 encodes a C. elegans thioredoxin-like protein orthologous to mammalian TXNL1.
F44G4.1	NA
act-5	act-5 encodes an ortholog of human cytoplasmic actin; act-5 is required for formation of the terminal web and microvilli on the apical surface of intestinal cells; act-5 also plays a role in mediating non-lytic exit of intracellular parasites from the intestine; act-5 is expressed only in intestinal cells and in the excretory cell; in the intestine, ACT-5 localizes to microvilli and the terminal …
pcp-2	pcp-2 encodes a prolyl carboxypeptidase.
catp-6	catp-6 encodes a predicted lysosomal P-type transmembrane cation transporting ATPase orthologous to human ATP13A2/PARK9 and yeast Ypk9; catp-6 is an essential gene: loss-of-function catp-6 mutations result in embryonic lethality at the one-cell stage and maternal sterility; catp-6 mutation can also result in nicotine hypersensitivity and catp-6 interacts genetically with human alpha-synuclein; wh…
sna-1	sna-1 encodes an snRNP-binding protein (SNA-1/SL21p) orthologous toAscaris SL30p (SL 30kd) and Brugia 13258.m00169, and paralogous toBrugia 14704.m00455; SNA-1 is found in the Sm snRNP SL1, but not in SL2;in snRNP SL1, SNA-1 associates with the SNA-2/SL75p protein, while beingreplaced by SUT-1/SL26p (a paralog of SNA-1) in snRNP Y; sna-1(RNAi)animals, like sut-1(bk79) mutants, have cold-sensitive…
Y95D11A.1	NA
C44C1.1	NA
uri-1	uri-1 encodes a molecular chaperone orthologous to the unconventional prefoldin RPB5 (RNA polymerase subunit 5) interactor, URI; in C.elegans, URI-1 activity is required for suppressing endogenous genotoxic DNA damage and thus, is essential for maintenance of genome integrity (DNA stability) and progression through the mitotic and meiotic cell cycles, particularly during germ cell development; UR…
ncbp-1	ncbp-1 encodes a putative nuclear cap-binding complex subunit ('CBP80') orthologous to budding yeast STO1 and human NCBP1 (OMIM:600469); in RNAi assays, ncbp-1 is required for embryonic and vulval development, normal locomotion, and general viability; by orthology to NCBP1, NCBP-1 is expected to participate in nonsense-mediated mRNA decay via a pioneerround of translation; ncbp-1(RNAi) induces ex…
C37H5.13	NA
mct-6	NA
mrpl-34	NA
ZK686.3	ZK686.3 is orthologous to the putative tumor suppressor candidate 3 (TUSC3); TUSC3 is involved in plasma membrane magnesium ion transport; ZK686.3 is also orthologous to the S. cerevisiae dolichyl-diphosphooligosaccharide-protein glycotransferase gamma chain (34-kD) subunit, OST3.
rnh-2	rnh-2 encodes the C. elegans ortholog of the large subunit of ribonuclease H2 (RNase H2).
mrps-31	NA
inf-1	inf-1 encodes a protein with high similarity to eukaryotic initiation factor 4A.
adsl-1	The R06C7.5 gene encodes an ortholog of the human gene ADSL, which when mutated leads to adenylosuccinate lyase deficiency (OMIM:103050).
aco-1	aco-1 encodes an aconitase that is homologous to mammalian iron regulatory protein-1 (IRP1); aco-1 activity is required for normal brood sizes and, under iron stress conditions, for normal lifespan and L4-to-adult growth rates; ACO-1 physically interacts with GEX-3; like IRP1, ACO-1 has aconitase activity and is post-translationally regulated by iron, but, unlike IRP1, it lacks RNA-binding activi…
F47B7.2	NA
Y43F8C.13	NA
far-8	NA
cri-3	NA
col-20	col-20 encodes a collagen; its expression pattern and mutant phenotypes are unknown.
mrpl-9	NA
F42A9.6	NA
K07H8.10	NA
his-41	his-41 encodes an H2B histone.
imb-3	imb-3 encodes an importin-beta-like protein orthologous to Drosophila, vertebrate, and yeast importin/karyopherin-beta3; IMB-3 is predicted to function as a nuclear transport factor that, with the RAN-1 GTPase, regulates nuclear import of ribosomal proteins; in C. elegans, IMB-3 is essential for embryogenesis and germline development, and may also be required for normal postembryonic growth rates.
mppa-1	NA
vglu-2	NA
F13H8.2	NA
gldc-1	R12C12.1 is orthologous to human GLYCINE DECARBOXYLASE (GLDC; OMIM:238300), which when mutated leads to glycine encephalopathy.
wdr-12	NA
VF13D12L.3	VF13D12L.3 is orthologous to the human gene ARGININOSUCCINATE SYNTHETASE (ASS; OMIM:603470), which when mutated leads to classic citrullinemia.
alh-9	NA
T26G10.1	NA
sars-1	srs-2 encodes a predicted cytoplasmic seryl-tRNA synthetase (SerRS), a class II aminoacyl-tRNA synthetase that catalyzes the attachment of serine to its cognate tRNA and is thus required for protein biosynthesis; in C. elegans, SRS-2 activity is required for embryonic and germline development and normal postembryonic growth rates.
hsp-3	hsp-3 encodes one of two C. elegans heat shock response 70 (hsp70) proteins homologous to mammalian grp78/BiP (glucose regulated protein 78/immunoglobulin heavy chain-binding protein, OMIM:138120); HSP-3 likely functions as a molecular chaperone, and is expressed constitutively (expression is not heat inducible) throughout development with greatest abundance during the L1 larval stage; hsp-3 tran…
K11D9.3	NA
dbt-1	ZK669.4 is orthologous to the human gene DIHYDROLIPOAMIDE BRANCHED CHAIN TRANSACYLASE (E2 COMPONENT OF BRANCHED CHAIN KETO ACID DEHYDROGENASE COMPLEX; (DBT), which when mutated leads to maple syrup urine disease, type II (OMIM:248610); the ZK669.4 protein is predicted to be mitochondrial with 68% accuracy.
Y39E4B.5	NA
H06I04.3	NA
B0464.6	NA
R04D3.3	NA
Y18D10A.23	NA
K07F5.14	NA
enpl-1	enpl-1 encodes the C. elegans ortholog of the Hsp90 family member and endoplasmic reticulum (ER) chaperone GRP94/GP96; loss of enpl-1 activity via RNAi results in slow growth, larval arrest, uncoordinated locomotion, and weak endocytosis defects; in addition, loss of enpl-1 expression results in an increase in hsp-4 expression, revealing compensatory regulation amongst ER chaperones; an enpl-1::g…
C03H12.1	NA
cpd-1	F59A3.1 encodes one of two C. elegans carboxypeptidase D homologs; loss of F59A3.1 activity via large-scale RNAi screens in a sensitized, rrf-3 mutant background results in larval lethality, abnormal locomotion, and abnormal morphogenesis of the vulval epithelium resulting in rupture; high-throughput expression studies report F59A3.1 expression in the pharynx only.
elo-1	elo-1 encodes a component of C-18 polyunsaturated fatty acid (PUFA) elongase that is required for normal elongation of n-6 and n-3 20-carbon PUFA in vivo; ELO-1 is a condensing enzyme that elongates n-6 and n-7 (and, with less efficiency, n-3) series C18 PUFAs.
F11C1.5	NA
chp-1	chp-1 encodes a protein containing two CHORD domains that is required for embryonic polarity, germline development, and vulval development.
apa-2	apa-2 encodes an adaptin: specifically, it encodes an ortholog of the alpha subunit of adaptor protein complex 2 (AP2); loss of apa-2 activity via RNAi results in defects in receptor-mediated yolk endocytosis and thus, embryonic lethality.
nhr-68	NA
D1054.3	NA
dnj-20	NA
nep-22	nep-22 encodes two isoforms of a neprilysin; neprilysins are thermolysin-like zinc metallopeptidases, found on the outer surface of animal cells, that negatively regulate small signalling peptides (e.g., enkephalin, tachykinin, insulin, and natriuretic peptides) by cleaving them; NEP-22 is orthologous to Ac-mep-1, a gut luminal neprilysin which is specifically expressed in the adult life stage of…
dis-3	NA
dnj-10	This gene encodes a protein containing a DnaJ ('J') domain that is predicted to be mitochondrial.
dpy-11	NA
R12C12.7	NA
mnat-1	NA
Y23H5B.5	NA
mrps-9	NA
gspd-1	gspd-1 encodes a protein orthologous to human GLUCOSE-6-PHOSPHATE DEHYDROGENASE (G6PD; OMIM:305900), which when mutated leads to disease.
C29E4.12	NA
mfap-1	mfap-1 encodes the C. elegans ortholog of the highly conserved mammalian microfibrillar-association protein1 (MFAP1); in C. elegans, MFAP-1 regulates alternative splicing and is essential for development; targets of MFAP-1 regulation include tos-1; MFAP-1 interacts with a number of protein in yeast two-hybrid screens including the products of K04G7.11 and D1054.14 that also encode presumptive spl…
B0035.15	NA
rpn-12	rpn-12 is predicted to encode a non-ATPase subunit of the 19S regulatory complex of the proteasome that interacts with NHR-6 in yeast two-hybrid assays.
gop-2	gop-2 encodes a member of the conserved hypothetical ATP binding protein family that affects embryonic viability, growth, and fertility.
pam-1	pam-1 encodes a metalloprotease that is the C. elegans puromycin-sensitive aminopeptidase (PSA) ortholog; in the one-cell embryo, PAM-1 is required for timely exit from meiosis II proper centrosome positioning, proper localization of polarity and cell fate determinants, and formation of the anteroposterior axis; genetic studies indicate that cyb-3, which encodes a B-type cyclin, is required for p…
C18E9.2	NA
rpoa-2	NA
let-268	let-268 encodes a procollagen lysyl hydroxylase that processes type IV collagen, a collagen secreted and incorporated into the basement membrane during embryogenesis (and encoded partly by emb-9); LET-268 activity is essential for type IV collagen processing and secretion and for the stability, but not the formation of, the basement membrane that provides mechanical support to body wall muscle on…
pcp-3	NA
C52D10.3	NA
C44B7.5	NA
C06G3.5	C06G3.5 is orthologous to human ADENOSINE DEAMINASE (ADA; OMIM:102700), which when mutated leads to severe combined immunodeficiency; in C. elegans, C06G3.5 is an essential gene; C06G3.5 is broadly expressed; about 2% to 6% of C06G3.5a transcripts are RNA edited to change A to G resulting in a change to residue 59 from a D to a G.
dct-6	NA
tin-44	NA
lron-3	NA
txdc-12.2	NA
ZK686.2	ZK686.2 encodes a DEAD-box helicase; loss of ZK686.2 activity via RNAi indicates that ZK686.2 activity is required for positive regulation of growth rate and larval development.
erd-2	erd-2 encodes a protein with homology to human ER lumen protein retaining receptor 1.
slc-17.4	NA
eif-3.J	NA
ZK512.2	NA
F09B12.3	NA
C43E11.9	NA
C35D10.5	C35D10.5 encodes the C. elegans homolog of vertebrate and budding yeast CBP3, a ubiquinol-cytochrome c reductase complex chaperone; by homology, the product of C35D10.5 is predicted to function as a mitochondrial enzyme-specific chaperone that is required for the assembly of ubiquinol-cytochrome c reductase; loss of C35D10.5 activity via RNAi results in embryos that contain a short pharynx and ro…
cee-1	NA
F13H10.8	NA
T28D6.7	NA
F17A9.5	NA
eif-2Bbeta	Y47H9C.7 is orthologous to the human gene EUKARYOTIC TRANSLATION INITIATION FACTOR 2B, SUBUNIT 2 (BETA, 39KD) (EIF2B2; OMIM:606454), which when mutated leads to disease.
T25B9.9	NA
ncx-1	ncx-1 encodes, by alternative splicing, two isoforms of a putative 3Na[+]/1Ca[2+] exchanger, orthologous to human SLC8A1-3 and paralogous to NCX-2/-3; NCX-1 is predicted to export free cytoplasmic Ca[2+] with low affinity but high capacity, being complemented by low-capacity/high-affinity Ca[2+] ATPase pumps such as MCA-1/-3; NCX-3 has tandem Calx-alpha and Calx-beta domains predicted to carry ou…
crt-1	crt-1 encodes an ortholog of calreticulin (a calcium-binding molecularchaperone of the endoplasmic reticulum); crt-1 is dispensable forviability, but required for normal sperm development, male matingefficiency, some forms of necrotic cell death, and hermaphrodite fertilityat high temperatures (which may reflect a stress response); crt-1expression is induced by stress; CRT-1 protein binds Ca(2+) …
alh-12	NA
vit-5	vit-5 encodes a vitellogenin, a lipid-binding protein precursor related to vertebrate vitellogenins and mammalian ApoB-100, a core LDL particle constituent; by homology, VIT-5 is predicted to function as a lipid transport protein; loss of vit-5 activity via large-scale RNA-mediated interference (RNAi) screens indicates that VIT-5 is required for embryogenesis and normal rates of postembryonic gro…
pro-3	NA
F57B10.8	NA
ifd-2	ifd-2 encodes a nonessential intermediate filament protein; IFD-2 is predicted to function as a structural component of the cytoskeleton; IFD-2 has no obvious function in RNAi assays.
pcp-4	NA
[truncated: 301 more rows]

## Sheet: 9
gene	log2FoldChange	lfcSE	pvalue	padj
Shisal1	6.69663	1.32433	4.26726e-07	4.78411e-06
[truncated: 2,344 more rows]

[truncated: 6 more sheets: 10, 11, 12, 13, 14, 15]
